# Supplementary material for: The Agassiz’s desert tortoise genome provides a resource for the conservation of a threatened species
Source: PLoS One. 2017 May 31;12(5):e0177708. doi: 10.1371/journal.pone.0177708 (PMC5451010; doi:10.1371/journal.pone.0177708)
Supplement: S3 Dataset — (XLS) [file pone.0177708.s017.xls]

## Sheet: gopaga-galgal.RBH.out
gopAga1_00004004-RA	ENSGALP00000017724
gopAga1_00009937-RA	ENSGALP00000024341
gopAga1_00010932-RA	ENSGALP00000012903
gopAga1_00000875-RA	ENSGALP00000021905
gopAga1_00010837-RA	ENSGALP00000043043
gopAga1_00002532-RA	ENSGALP00000030468
gopAga1_00002598-RA	ENSGALP00000012092
gopAga1_00003647-RA	ENSGALP00000023677
gopAga1_00016418-RA	ENSGALP00000035573
gopAga1_00007271-RA	ENSGALP00000013729
gopAga1_00010823-RA	ENSGALP00000025128
gopAga1_00016410-RC	ENSGALP00000027191
gopAga1_00000702-RA	ENSGALP00000015277
gopAga1_00019194-RA	ENSGALP00000040685
gopAga1_00016142-RD	ENSGALP00000014621
gopAga1_00005287-RA	ENSGALP00000022075
gopAga1_00014437-RA	ENSGALP00000008350
gopAga1_00010956-RA	ENSGALP00000018675
gopAga1_00013680-RA	ENSGALP00000002505
gopAga1_00013286-RB	ENSGALP00000001306
gopAga1_00003171-RA	ENSGALP00000024151
gopAga1_00013820-RA	ENSGALP00000016685
gopAga1_00015661-RA	ENSGALP00000004601
gopAga1_00005843-RA	ENSGALP00000025450
gopAga1_00002436-RA	ENSGALP00000041391
gopAga1_00006700-RB	ENSGALP00000009015
gopAga1_00001607-RA	ENSGALP00000034037
gopAga1_00004154-RA	ENSGALP00000009003
gopAga1_00000109-RA	ENSGALP00000012992
gopAga1_00010077-RA	ENSGALP00000022091
gopAga1_00008115-RA	ENSGALP00000007694
gopAga1_00001794-RB	ENSGALP00000005453
gopAga1_00012402-RA	ENSGALP00000032931
gopAga1_00015363-RA	ENSGALP00000041755
gopAga1_00012570-RA	ENSGALP00000005171
gopAga1_00008182-RA	ENSGALP00000019859
gopAga1_00000842-RA	ENSGALP00000002121
gopAga1_00005265-RA	ENSGALP00000023295
gopAga1_00005421-RA	ENSGALP00000041968
gopAga1_00005897-RA	ENSGALP00000027173
gopAga1_00007827-RA	ENSGALP00000023380
gopAga1_00005377-RA	ENSGALP00000006003
gopAga1_00016698-RA	ENSGALP00000039722
gopAga1_00001379-RA	ENSGALP00000014878
gopAga1_00018497-RA	ENSGALP00000040533
gopAga1_00009369-RA	ENSGALP00000013334
gopAga1_00003335-RA	ENSGALP00000009512
gopAga1_00010047-RB	ENSGALP00000042975
gopAga1_00010213-RA	ENSGALP00000024916
gopAga1_00012328-RA	ENSGALP00000014047
gopAga1_00002780-RA	ENSGALP00000014011
gopAga1_00016343-RA	ENSGALP00000025162
gopAga1_00010962-RA	ENSGALP00000026794
gopAga1_00004967-RA	ENSGALP00000014967
gopAga1_00005153-RA	ENSGALP00000001713
gopAga1_00015531-RA	ENSGALP00000026337
gopAga1_00002625-RA	ENSGALP00000011924
gopAga1_00009600-RA	ENSGALP00000034153
gopAga1_00007122-RA	ENSGALP00000020805
gopAga1_00007900-RA	ENSGALP00000012644
gopAga1_00004581-RE	ENSGALP00000011601
gopAga1_00007622-RA	ENSGALP00000043439
gopAga1_00002998-RA	ENSGALP00000021030
gopAga1_00000097-RA	ENSGALP00000006925
gopAga1_00003387-RA	ENSGALP00000012503
gopAga1_00003621-RA	ENSGALP00000041843
gopAga1_00017941-RB	ENSGALP00000024018
gopAga1_00011889-RA	ENSGALP00000009681
gopAga1_00004422-RA	ENSGALP00000025439
gopAga1_00000067-RA	ENSGALP00000042546
gopAga1_00004043-RA	ENSGALP00000008398
gopAga1_00000103-RB	ENSGALP00000033775
gopAga1_00009128-RA	ENSGALP00000013575
gopAga1_00009006-RA	ENSGALP00000000297
gopAga1_00011618-RA	ENSGALP00000018902
gopAga1_00018424-RA	ENSGALP00000022928
gopAga1_00019521-RA	ENSGALP00000019810
gopAga1_00004331-RA	ENSGALP00000042479
gopAga1_00018670-RA	ENSGALP00000043299
gopAga1_00015280-RA	ENSGALP00000042321
gopAga1_00002690-RA	ENSGALP00000034255
gopAga1_00000013-RA	ENSGALP00000013717
gopAga1_00010265-RA	ENSGALP00000014356
gopAga1_00018753-RA	ENSGALP00000003760
gopAga1_00012196-RA	ENSGALP00000001210
gopAga1_00004688-RA	ENSGALP00000025547
gopAga1_00013800-RA	ENSGALP00000015453
gopAga1_00018382-RA	ENSGALP00000014398
gopAga1_00005881-RA	ENSGALP00000010404
gopAga1_00001561-RA	ENSGALP00000004130
gopAga1_00014422-RA	ENSGALP00000023887
gopAga1_00016724-RA	ENSGALP00000016155
gopAga1_00002748-RA	ENSGALP00000010165
gopAga1_00008075-RA	ENSGALP00000019248
gopAga1_00011765-RA	ENSGALP00000004190
gopAga1_00002814-RA	ENSGALP00000009453
gopAga1_00008273-RA	ENSGALP00000024805
gopAga1_00011500-RA	ENSGALP00000021613
gopAga1_00008076-RA	ENSGALP00000032692
gopAga1_00010383-RA	ENSGALP00000023943
gopAga1_00014718-RA	ENSGALP00000036770
gopAga1_00013857-RA	ENSGALP00000022481
gopAga1_00008357-RA	ENSGALP00000027760
gopAga1_00008990-RA	ENSGALP00000037931
gopAga1_00016500-RA	ENSGALP00000001751
gopAga1_00013242-RA	ENSGALP00000019719
gopAga1_00000832-RA	ENSGALP00000009460
gopAga1_00015563-RA	ENSGALP00000042885
gopAga1_00013945-RA	ENSGALP00000026304
gopAga1_00017364-RA	ENSGALP00000006765
gopAga1_00018711-RA	ENSGALP00000016631
gopAga1_00012539-RA	ENSGALP00000025633
gopAga1_00014157-RB	ENSGALP00000025637
gopAga1_00002010-RA	ENSGALP00000021353
gopAga1_00009834-RA	ENSGALP00000020275
gopAga1_00009194-RA	ENSGALP00000001472
gopAga1_00011946-RA	ENSGALP00000041129
gopAga1_00015680-RA	ENSGALP00000018109
gopAga1_00016578-RA	ENSGALP00000040720
gopAga1_00009412-RA	ENSGALP00000019244
gopAga1_00005688-RA	ENSGALP00000036138
gopAga1_00001076-RA	ENSGALP00000015101
gopAga1_00014533-RA	ENSGALP00000018278
gopAga1_00007055-RA	ENSGALP00000029511
gopAga1_00003109-RD	ENSGALP00000005918
gopAga1_00008082-RA	ENSGALP00000005298
gopAga1_00001780-RA	ENSGALP00000006090
gopAga1_00001800-RA	ENSGALP00000005317
gopAga1_00011219-RA	ENSGALP00000012203
gopAga1_00008695-RB	ENSGALP00000043019
gopAga1_00003267-RA	ENSGALP00000036339
gopAga1_00007224-RC	ENSGALP00000019231
gopAga1_00008242-RA	ENSGALP00000013598
gopAga1_00007156-RA	ENSGALP00000005343
gopAga1_00019571-RA	ENSGALP00000042426
gopAga1_00002255-RA	ENSGALP00000011629
gopAga1_00015178-RB	ENSGALP00000020888
gopAga1_00008186-RA	ENSGALP00000004301
gopAga1_00004262-RA	ENSGALP00000004249
gopAga1_00017905-RA	ENSGALP00000043460
gopAga1_00010402-RA	ENSGALP00000021608
gopAga1_00011400-RA	ENSGALP00000013068
gopAga1_00002573-RA	ENSGALP00000026433
gopAga1_00008620-RA	ENSGALP00000024627
gopAga1_00001954-RA	ENSGALP00000042507
gopAga1_00014117-RA	ENSGALP00000036643
gopAga1_00012466-RA	ENSGALP00000001151
gopAga1_00010070-RA	ENSGALP00000039384
gopAga1_00016487-RA	ENSGALP00000024312
gopAga1_00010521-RA	ENSGALP00000022861
gopAga1_00010262-RA	ENSGALP00000014372
gopAga1_00011184-RA	ENSGALP00000042776
gopAga1_00004979-RA	ENSGALP00000040065
gopAga1_00018729-RA	ENSGALP00000020749
gopAga1_00002445-RA	ENSGALP00000020947
gopAga1_00014081-RA	ENSGALP00000005232
gopAga1_00001732-RA	ENSGALP00000041462
gopAga1_00002384-RA	ENSGALP00000042579
gopAga1_00011342-RA	ENSGALP00000004465
gopAga1_00011690-RB	ENSGALP00000002656
gopAga1_00012793-RA	ENSGALP00000036794
gopAga1_00018183-RB	ENSGALP00000001129
gopAga1_00015506-RA	ENSGALP00000000864
gopAga1_00012180-RB	ENSGALP00000009666
gopAga1_00001850-RA	ENSGALP00000017399
gopAga1_00000010-RA	ENSGALP00000013683
gopAga1_00009520-RA	ENSGALP00000040376
gopAga1_00013444-RA	ENSGALP00000025622
gopAga1_00012135-RA	ENSGALP00000039522
gopAga1_00012371-RA	ENSGALP00000022452
gopAga1_00011981-RA	ENSGALP00000003934
gopAga1_00015211-RA	ENSGALP00000017016
gopAga1_00014511-RA	ENSGALP00000010750
gopAga1_00001795-RA	ENSGALP00000041419
gopAga1_00003179-RA	ENSGALP00000019758
gopAga1_00000110-RA	ENSGALP00000038052
gopAga1_00019964-RA	ENSGALP00000041247
gopAga1_00003759-RA	ENSGALP00000028328
gopAga1_00011298-RA	ENSGALP00000041000
gopAga1_00001872-RA	ENSGALP00000042126
gopAga1_00007325-RA	ENSGALP00000017360
gopAga1_00019663-RA	ENSGALP00000014282
gopAga1_00008156-RA	ENSGALP00000002859
gopAga1_00000375-RA	ENSGALP00000033570
gopAga1_00012063-RA	ENSGALP00000009724
gopAga1_00001994-RA	ENSGALP00000000960
gopAga1_00019697-RA	ENSGALP00000041151
gopAga1_00015802-RA	ENSGALP00000011876
gopAga1_00002746-RA	ENSGALP00000009265
gopAga1_00011759-RA	ENSGALP00000027647
gopAga1_00017294-RB	ENSGALP00000039637
gopAga1_00002508-RA	ENSGALP00000001804
gopAga1_00018897-RA	ENSGALP00000024825
gopAga1_00006855-RA	ENSGALP00000012607
gopAga1_00008438-RA	ENSGALP00000001234
gopAga1_00006370-RA	ENSGALP00000003634
gopAga1_00007756-RA	ENSGALP00000032101
gopAga1_00003743-RA	ENSGALP00000010328
gopAga1_00005326-RA	ENSGALP00000007774
gopAga1_00017117-RA	ENSGALP00000023838
gopAga1_00014812-RA	ENSGALP00000023447
gopAga1_00006328-RA	ENSGALP00000024531
gopAga1_00006925-RA	ENSGALP00000041880
gopAga1_00002097-RA	ENSGALP00000009594
gopAga1_00017533-RA	ENSGALP00000041285
gopAga1_00012235-RA	ENSGALP00000026942
gopAga1_00003030-RA	ENSGALP00000004475
gopAga1_00014899-RA	ENSGALP00000014504
gopAga1_00005724-RA	ENSGALP00000040671
gopAga1_00004097-RA	ENSGALP00000041992
gopAga1_00006178-RA	ENSGALP00000014623
gopAga1_00000346-RA	ENSGALP00000012353
gopAga1_00003078-RA	ENSGALP00000009098
gopAga1_00003131-RD	ENSGALP00000001443
gopAga1_00008951-RA	ENSGALP00000024798
gopAga1_00014806-RA	ENSGALP00000039943
gopAga1_00012352-RA	ENSGALP00000020014
gopAga1_00013659-RA	ENSGALP00000042521
gopAga1_00018807-RA	ENSGALP00000022405
gopAga1_00007128-RB	ENSGALP00000032649
gopAga1_00005915-RB	ENSGALP00000022235
gopAga1_00010178-RB	ENSGALP00000007580
gopAga1_00003133-RA	ENSGALP00000001446
gopAga1_00005552-RA	ENSGALP00000000945
gopAga1_00000551-RA	ENSGALP00000041455
gopAga1_00015924-RA	ENSGALP00000017899
gopAga1_00009762-RA	ENSGALP00000027075
gopAga1_00015109-RA	ENSGALP00000006445
gopAga1_00010576-RC	ENSGALP00000016419
gopAga1_00011136-RA	ENSGALP00000000056
gopAga1_00004686-RA	ENSGALP00000025563
gopAga1_00003943-RA	ENSGALP00000022199
gopAga1_00000741-RA	ENSGALP00000015527
gopAga1_00015364-RA	ENSGALP00000042813
gopAga1_00016284-RB	ENSGALP00000011538
gopAga1_00010893-RA	ENSGALP00000042322
gopAga1_00003228-RA	ENSGALP00000024060
gopAga1_00007389-RA	ENSGALP00000038922
gopAga1_00004485-RA	ENSGALP00000031771
gopAga1_00016126-RA	ENSGALP00000022521
gopAga1_00009713-RA	ENSGALP00000004660
gopAga1_00003159-RF	ENSGALP00000010697
gopAga1_00010952-RA	ENSGALP00000041259
gopAga1_00000577-RA	ENSGALP00000017570
gopAga1_00002486-RA	ENSGALP00000025054
gopAga1_00004640-RA	ENSGALP00000016831
gopAga1_00002303-RA	ENSGALP00000029363
gopAga1_00016615-RA	ENSGALP00000010874
gopAga1_00008161-RA	ENSGALP00000009487
gopAga1_00014925-RD	ENSGALP00000024123
gopAga1_00004252-RA	ENSGALP00000003828
gopAga1_00005585-RA	ENSGALP00000003437
gopAga1_00013396-RA	ENSGALP00000012608
gopAga1_00005525-RA	ENSGALP00000008695
gopAga1_00019126-RA	ENSGALP00000001521
gopAga1_00011222-RA	ENSGALP00000042289
gopAga1_00004538-RA	ENSGALP00000003909
gopAga1_00007154-RC	ENSGALP00000005311
gopAga1_00001458-RA	ENSGALP00000042727
gopAga1_00006116-RA	ENSGALP00000007941
gopAga1_00004386-RA	ENSGALP00000011025
gopAga1_00001239-RA	ENSGALP00000028424
gopAga1_00000465-RA	ENSGALP00000042178
gopAga1_00004199-RA	ENSGALP00000012395
gopAga1_00017599-RA	ENSGALP00000019572
gopAga1_00015457-RA	ENSGALP00000031837
gopAga1_00012463-RA	ENSGALP00000022544
gopAga1_00013352-RA	ENSGALP00000003395
gopAga1_00015442-RA	ENSGALP00000035505
gopAga1_00011448-RA	ENSGALP00000012293
gopAga1_00000319-RA	ENSGALP00000034416
gopAga1_00016864-RA	ENSGALP00000031118
gopAga1_00013328-RA	ENSGALP00000025820
gopAga1_00015462-RA	ENSGALP00000043213
gopAga1_00004197-RA	ENSGALP00000038691
gopAga1_00014356-RA	ENSGALP00000019399
gopAga1_00009524-RA	ENSGALP00000042709
gopAga1_00020049-RA	ENSGALP00000042282
gopAga1_00007249-RA	ENSGALP00000017421
gopAga1_00008999-RA	ENSGALP00000024926
gopAga1_00013134-RA	ENSGALP00000000837
gopAga1_00003385-RA	ENSGALP00000034026
gopAga1_00007426-RA	ENSGALP00000011510
gopAga1_00001255-RA	ENSGALP00000002244
gopAga1_00011847-RA	ENSGALP00000027781
gopAga1_00018284-RA	ENSGALP00000008637
gopAga1_00010693-RA	ENSGALP00000012854
gopAga1_00003252-RA	ENSGALP00000021524
gopAga1_00009698-RA	ENSGALP00000019907
gopAga1_00009097-RA	ENSGALP00000016263
gopAga1_00000589-RA	ENSGALP00000013458
gopAga1_00010721-RA	ENSGALP00000025663
gopAga1_00012427-RA	ENSGALP00000001352
gopAga1_00006629-RA	ENSGALP00000041833
gopAga1_00014089-RA	ENSGALP00000008879
gopAga1_00013949-RA	ENSGALP00000004483
gopAga1_00008452-RA	ENSGALP00000025177
gopAga1_00014711-RA	ENSGALP00000030606
gopAga1_00002259-RA	ENSGALP00000039286
gopAga1_00011011-RA	ENSGALP00000042374
gopAga1_00010079-RA	ENSGALP00000042467
gopAga1_00009858-RA	ENSGALP00000026739
gopAga1_00017519-RA	ENSGALP00000006639
gopAga1_00012094-RA	ENSGALP00000019423
gopAga1_00014802-RA	ENSGALP00000025005
gopAga1_00001101-RA	ENSGALP00000008111
gopAga1_00013911-RA	ENSGALP00000042531
gopAga1_00005024-RA	ENSGALP00000017568
gopAga1_00015416-RA	ENSGALP00000003060
gopAga1_00004462-RA	ENSGALP00000009333
gopAga1_00005598-RA	ENSGALP00000031018
gopAga1_00000814-RA	ENSGALP00000001832
gopAga1_00011028-RA	ENSGALP00000025198
gopAga1_00009377-RA	ENSGALP00000001923
gopAga1_00005640-RA	ENSGALP00000024544
gopAga1_00011965-RA	ENSGALP00000008236
gopAga1_00004641-RA	ENSGALP00000031922
gopAga1_00011792-RA	ENSGALP00000032152
gopAga1_00010666-RB	ENSGALP00000021854
gopAga1_00001532-RA	ENSGALP00000010522
gopAga1_00010666-RD	ENSGALP00000021848
gopAga1_00012800-RA	ENSGALP00000020830
gopAga1_00004713-RA	ENSGALP00000014752
gopAga1_00014673-RA	ENSGALP00000026289
gopAga1_00008272-RA	ENSGALP00000024806
gopAga1_00003030-RD	ENSGALP00000004458
gopAga1_00015991-RA	ENSGALP00000036135
gopAga1_00005454-RA	ENSGALP00000014517
gopAga1_00000073-RA	ENSGALP00000019808
gopAga1_00007970-RA	ENSGALP00000019761
gopAga1_00009365-RA	ENSGALP00000036433
gopAga1_00012654-RA	ENSGALP00000007897
gopAga1_00017416-RA	ENSGALP00000024495
gopAga1_00014328-RA	ENSGALP00000016441
gopAga1_00014513-RA	ENSGALP00000041387
gopAga1_00007077-RA	ENSGALP00000011626
gopAga1_00008873-RA	ENSGALP00000027180
gopAga1_00018404-RA	ENSGALP00000019903
gopAga1_00009800-RA	ENSGALP00000018561
gopAga1_00008713-RA	ENSGALP00000004775
gopAga1_00012825-RA	ENSGALP00000014301
gopAga1_00006663-RA	ENSGALP00000018259
gopAga1_00004905-RA	ENSGALP00000003288
gopAga1_00011346-RA	ENSGALP00000038966
gopAga1_00012462-RC	ENSGALP00000022545
gopAga1_00002966-RA	ENSGALP00000042456
gopAga1_00005885-RA	ENSGALP00000020739
gopAga1_00009017-RA	ENSGALP00000021293
gopAga1_00014957-RA	ENSGALP00000025604
gopAga1_00013623-RA	ENSGALP00000012027
gopAga1_00018191-RB	ENSGALP00000042085
gopAga1_00018443-RA	ENSGALP00000042570
gopAga1_00014852-RA	ENSGALP00000012772
gopAga1_00013146-RA	ENSGALP00000043243
gopAga1_00003972-RB	ENSGALP00000006589
gopAga1_00006941-RA	ENSGALP00000036463
gopAga1_00005670-RB	ENSGALP00000041109
gopAga1_00003342-RA	ENSGALP00000009830
gopAga1_00000257-RA	ENSGALP00000009813
gopAga1_00004388-RA	ENSGALP00000003823
gopAga1_00003830-RB	ENSGALP00000007181
gopAga1_00006859-RA	ENSGALP00000008508
gopAga1_00004212-RA	ENSGALP00000018050
gopAga1_00010503-RA	ENSGALP00000023610
gopAga1_00008203-RA	ENSGALP00000041120
gopAga1_00007763-RA	ENSGALP00000010596
gopAga1_00005837-RA	ENSGALP00000000419
gopAga1_00007496-RA	ENSGALP00000023805
gopAga1_00008755-RA	ENSGALP00000003317
gopAga1_00002606-RA	ENSGALP00000012090
gopAga1_00008166-RC	ENSGALP00000012233
gopAga1_00005413-RB	ENSGALP00000003717
gopAga1_00009657-RA	ENSGALP00000024699
gopAga1_00017627-RA	ENSGALP00000011632
gopAga1_00000868-RA	ENSGALP00000042894
gopAga1_00018365-RA	ENSGALP00000040588
gopAga1_00004051-RA	ENSGALP00000022662
gopAga1_00010096-RB	ENSGALP00000020184
gopAga1_00014822-RB	ENSGALP00000013720
gopAga1_00005101-RA	ENSGALP00000008503
gopAga1_00018527-RA	ENSGALP00000036997
gopAga1_00006851-RA	ENSGALP00000036326
gopAga1_00013362-RA	ENSGALP00000026855
gopAga1_00013234-RA	ENSGALP00000027063
gopAga1_00005045-RA	ENSGALP00000009844
gopAga1_00012415-RA	ENSGALP00000027828
gopAga1_00015527-RA	ENSGALP00000040443
gopAga1_00011611-RA	ENSGALP00000022961
gopAga1_00006331-RA	ENSGALP00000003479
gopAga1_00004221-RA	ENSGALP00000003315
gopAga1_00015883-RC	ENSGALP00000016527
gopAga1_00010915-RA	ENSGALP00000011298
gopAga1_00017336-RA	ENSGALP00000042491
gopAga1_00004738-RA	ENSGALP00000024696
gopAga1_00004861-RA	ENSGALP00000023110
gopAga1_00007687-RA	ENSGALP00000026711
gopAga1_00007738-RA	ENSGALP00000038829
gopAga1_00013398-RA	ENSGALP00000015506
gopAga1_00006306-RA	ENSGALP00000014349
gopAga1_00010216-RA	ENSGALP00000024927
gopAga1_00011999-RA	ENSGALP00000001531
gopAga1_00013138-RA	ENSGALP00000023027
gopAga1_00013287-RC	ENSGALP00000001235
gopAga1_00009824-RA	ENSGALP00000009964
gopAga1_00006633-RA	ENSGALP00000002654
gopAga1_00006199-RA	ENSGALP00000027769
gopAga1_00010832-RA	ENSGALP00000009449
gopAga1_00000185-RA	ENSGALP00000036715
gopAga1_00011762-RA	ENSGALP00000011213
gopAga1_00012212-RA	ENSGALP00000012703
gopAga1_00008483-RA	ENSGALP00000002563
gopAga1_00001286-RA	ENSGALP00000006947
gopAga1_00008689-RA	ENSGALP00000019359
gopAga1_00000633-RA	ENSGALP00000010621
gopAga1_00019798-RA	ENSGALP00000027196
gopAga1_00009209-RA	ENSGALP00000021117
gopAga1_00010697-RA	ENSGALP00000041515
gopAga1_00018564-RA	ENSGALP00000023564
gopAga1_00011093-RB	ENSGALP00000004827
gopAga1_00012349-RA	ENSGALP00000035841
gopAga1_00008332-RA	ENSGALP00000006259
gopAga1_00002985-RA	ENSGALP00000037940
gopAga1_00017314-RA	ENSGALP00000038150
gopAga1_00005941-RA	ENSGALP00000021842
gopAga1_00004506-RA	ENSGALP00000021488
gopAga1_00015713-RA	ENSGALP00000002847
gopAga1_00015313-RA	ENSGALP00000018669
gopAga1_00006114-RA	ENSGALP00000009035
gopAga1_00012975-RC	ENSGALP00000037222
gopAga1_00004425-RA	ENSGALP00000042872
gopAga1_00010086-RA	ENSGALP00000042223
gopAga1_00000573-RA	ENSGALP00000034654
gopAga1_00005903-RA	ENSGALP00000037069
gopAga1_00006248-RA	ENSGALP00000042420
gopAga1_00017033-RA	ENSGALP00000010060
gopAga1_00015560-RA	ENSGALP00000023574
gopAga1_00000617-RB	ENSGALP00000039158
gopAga1_00000398-RA	ENSGALP00000005541
gopAga1_00017670-RA	ENSGALP00000014665
gopAga1_00015754-RB	ENSGALP00000007692
gopAga1_00012054-RA	ENSGALP00000042448
gopAga1_00019903-RA	ENSGALP00000040895
gopAga1_00018152-RA	ENSGALP00000041804
gopAga1_00009804-RA	ENSGALP00000018519
gopAga1_00012986-RC	ENSGALP00000018472
gopAga1_00017513-RA	ENSGALP00000041745
gopAga1_00004423-RA	ENSGALP00000025442
gopAga1_00014276-RA	ENSGALP00000015922
gopAga1_00002809-RA	ENSGALP00000008830
gopAga1_00011264-RA	ENSGALP00000012646
gopAga1_00010649-RA	ENSGALP00000037382
gopAga1_00006227-RA	ENSGALP00000006372
gopAga1_00015694-RA	ENSGALP00000008677
gopAga1_00016044-RA	ENSGALP00000031442
gopAga1_00002553-RA	ENSGALP00000007436
gopAga1_00009547-RA	ENSGALP00000010397
gopAga1_00017757-RA	ENSGALP00000014485
gopAga1_00006562-RA	ENSGALP00000039492
gopAga1_00000329-RB	ENSGALP00000038022
gopAga1_00017999-RA	ENSGALP00000039786
gopAga1_00017656-RA	ENSGALP00000014824
gopAga1_00004559-RA	ENSGALP00000018878
gopAga1_00007979-RA	ENSGALP00000000409
gopAga1_00001706-RA	ENSGALP00000006684
gopAga1_00013456-RA	ENSGALP00000027628
gopAga1_00008792-RA	ENSGALP00000005391
gopAga1_00010800-RA	ENSGALP00000018816
gopAga1_00004547-RA	ENSGALP00000015723
gopAga1_00015624-RB	ENSGALP00000037460
gopAga1_00012425-RA	ENSGALP00000040597
gopAga1_00005694-RA	ENSGALP00000018780
gopAga1_00002323-RA	ENSGALP00000038231
gopAga1_00007206-RA	ENSGALP00000011610
gopAga1_00012894-RA	ENSGALP00000036816
gopAga1_00000245-RB	ENSGALP00000009544
gopAga1_00007289-RA	ENSGALP00000017404
gopAga1_00014413-RA	ENSGALP00000011060
gopAga1_00014175-RA	ENSGALP00000036843
gopAga1_00004289-RA	ENSGALP00000035514
gopAga1_00003931-RA	ENSGALP00000006891
gopAga1_00008235-RA	ENSGALP00000039107
gopAga1_00019669-RA	ENSGALP00000038405
gopAga1_00001036-RA	ENSGALP00000009094
gopAga1_00010304-RA	ENSGALP00000005598
gopAga1_00014080-RA	ENSGALP00000005435
gopAga1_00009850-RA	ENSGALP00000026322
gopAga1_00001417-RA	ENSGALP00000013486
gopAga1_00000386-RA	ENSGALP00000005047
gopAga1_00003039-RA	ENSGALP00000032574
gopAga1_00014125-RA	ENSGALP00000007480
gopAga1_00010164-RA	ENSGALP00000031029
gopAga1_00000835-RA	ENSGALP00000009447
gopAga1_00001805-RA	ENSGALP00000005284
gopAga1_00012007-RB	ENSGALP00000040649
gopAga1_00010929-RA	ENSGALP00000037374
gopAga1_00011969-RB	ENSGALP00000017577
gopAga1_00004458-RA	ENSGALP00000039023
gopAga1_00016244-RA	ENSGALP00000005645
gopAga1_00010653-RA	ENSGALP00000008606
gopAga1_00007405-RA	ENSGALP00000032121
gopAga1_00004995-RA	ENSGALP00000016585
gopAga1_00009068-RA	ENSGALP00000012509
gopAga1_00002060-RA	ENSGALP00000010242
gopAga1_00004106-RA	ENSGALP00000017330
gopAga1_00004381-RA	ENSGALP00000021704
gopAga1_00005865-RA	ENSGALP00000012304
gopAga1_00016892-RA	ENSGALP00000020344
gopAga1_00002172-RA	ENSGALP00000021103
gopAga1_00012722-RA	ENSGALP00000024083
gopAga1_00016367-RA	ENSGALP00000042669
gopAga1_00000008-RA	ENSGALP00000013622
gopAga1_00010623-RA	ENSGALP00000031778
gopAga1_00011238-RA	ENSGALP00000007365
gopAga1_00008818-RA	ENSGALP00000016464
gopAga1_00007715-RB	ENSGALP00000006706
gopAga1_00012026-RA	ENSGALP00000004550
gopAga1_00005064-RA	ENSGALP00000005427
gopAga1_00011877-RA	ENSGALP00000034077
gopAga1_00015818-RA	ENSGALP00000036802
gopAga1_00007329-RA	ENSGALP00000017852
gopAga1_00014190-RA	ENSGALP00000003126
gopAga1_00002668-RA	ENSGALP00000041784
gopAga1_00001176-RA	ENSGALP00000043136
gopAga1_00008599-RA	ENSGALP00000022737
gopAga1_00004954-RA	ENSGALP00000012743
gopAga1_00018385-RB	ENSGALP00000004037
gopAga1_00007226-RA	ENSGALP00000019233
gopAga1_00000018-RA	ENSGALP00000013741
gopAga1_00011061-RA	ENSGALP00000005607
gopAga1_00007115-RA	ENSGALP00000000478
gopAga1_00014048-RA	ENSGALP00000042166
gopAga1_00011536-RA	ENSGALP00000006959
gopAga1_00002418-RA	ENSGALP00000000223
gopAga1_00004304-RB	ENSGALP00000003004
gopAga1_00014739-RD	ENSGALP00000008467
gopAga1_00010283-RB	ENSGALP00000038626
gopAga1_00015626-RA	ENSGALP00000022963
gopAga1_00008972-RA	ENSGALP00000015273
gopAga1_00007647-RA	ENSGALP00000029877
gopAga1_00008325-RA	ENSGALP00000006041
gopAga1_00014497-RA	ENSGALP00000027380
gopAga1_00010608-RA	ENSGALP00000013714
gopAga1_00003958-RA	ENSGALP00000013682
gopAga1_00011056-RA	ENSGALP00000025525
gopAga1_00011207-RA	ENSGALP00000014239
gopAga1_00014264-RA	ENSGALP00000043134
gopAga1_00011743-RA	ENSGALP00000029046
gopAga1_00004663-RA	ENSGALP00000010375
gopAga1_00018975-RA	ENSGALP00000001725
gopAga1_00000473-RA	ENSGALP00000004390
gopAga1_00001937-RB	ENSGALP00000009752
gopAga1_00004829-RA	ENSGALP00000038432
gopAga1_00006525-RA	ENSGALP00000010407
gopAga1_00004779-RA	ENSGALP00000043007
gopAga1_00006544-RA	ENSGALP00000042390
gopAga1_00005855-RA	ENSGALP00000040770
gopAga1_00010397-RA	ENSGALP00000015440
gopAga1_00019000-RA	ENSGALP00000027462
gopAga1_00014862-RA	ENSGALP00000022465
gopAga1_00015948-RA	ENSGALP00000002242
gopAga1_00011643-RA	ENSGALP00000009567
gopAga1_00008360-RA	ENSGALP00000018854
gopAga1_00000469-RA	ENSGALP00000005780
gopAga1_00000904-RA	ENSGALP00000007864
gopAga1_00003069-RA	ENSGALP00000034226
gopAga1_00004721-RA	ENSGALP00000027479
gopAga1_00018441-RA	ENSGALP00000004453
gopAga1_00012929-RA	ENSGALP00000035808
gopAga1_00002767-RA	ENSGALP00000017467
gopAga1_00013555-RA	ENSGALP00000024075
gopAga1_00013803-RB	ENSGALP00000013618
gopAga1_00005321-RC	ENSGALP00000023897
gopAga1_00015312-RA	ENSGALP00000025057
gopAga1_00019808-RA	ENSGALP00000016401
gopAga1_00009653-RA	ENSGALP00000025877
gopAga1_00006068-RA	ENSGALP00000027710
gopAga1_00017191-RA	ENSGALP00000000495
gopAga1_00007894-RA	ENSGALP00000017191
gopAga1_00007775-RB	ENSGALP00000011634
gopAga1_00012833-RA	ENSGALP00000017465
gopAga1_00016885-RA	ENSGALP00000024253
gopAga1_00001035-RC	ENSGALP00000009080
gopAga1_00005369-RA	ENSGALP00000016380
gopAga1_00001913-RA	ENSGALP00000007330
gopAga1_00009712-RA	ENSGALP00000042926
gopAga1_00017502-RA	ENSGALP00000021835
gopAga1_00004942-RA	ENSGALP00000006178
gopAga1_00005626-RA	ENSGALP00000018410
gopAga1_00012162-RA	ENSGALP00000039767
gopAga1_00010898-RA	ENSGALP00000041157
gopAga1_00005498-RA	ENSGALP00000006304
gopAga1_00017042-RA	ENSGALP00000042424
gopAga1_00001129-RA	ENSGALP00000004529
gopAga1_00006917-RA	ENSGALP00000025837
gopAga1_00002594-RA	ENSGALP00000038787
gopAga1_00014813-RA	ENSGALP00000023450
gopAga1_00015939-RA	ENSGALP00000026293
gopAga1_00001957-RA	ENSGALP00000005026
gopAga1_00013845-RA	ENSGALP00000019405
gopAga1_00015674-RA	ENSGALP00000019012
gopAga1_00002455-RC	ENSGALP00000005991
gopAga1_00011232-RA	ENSGALP00000013132
gopAga1_00014484-RA	ENSGALP00000004803
gopAga1_00012815-RA	ENSGALP00000031205
gopAga1_00001013-RA	ENSGALP00000025509
gopAga1_00002450-RA	ENSGALP00000020966
gopAga1_00010809-RA	ENSGALP00000019862
gopAga1_00007613-RA	ENSGALP00000043264
gopAga1_00012216-RB	ENSGALP00000016630
gopAga1_00004993-RB	ENSGALP00000016566
gopAga1_00004459-RA	ENSGALP00000005794
gopAga1_00001131-RC	ENSGALP00000004515
gopAga1_00017320-RA	ENSGALP00000026353
gopAga1_00005702-RA	ENSGALP00000004833
gopAga1_00015561-RA	ENSGALP00000020445
gopAga1_00017071-RA	ENSGALP00000026938
gopAga1_00004138-RB	ENSGALP00000025124
gopAga1_00017114-RA	ENSGALP00000009182
gopAga1_00009441-RA	ENSGALP00000010009
gopAga1_00012959-RA	ENSGALP00000002513
gopAga1_00000181-RA	ENSGALP00000012540
gopAga1_00009161-RA	ENSGALP00000008818
gopAga1_00006717-RA	ENSGALP00000023091
gopAga1_00014035-RA	ENSGALP00000025714
gopAga1_00011681-RA	ENSGALP00000016845
gopAga1_00016075-RA	ENSGALP00000017260
gopAga1_00014369-RA	ENSGALP00000002998
gopAga1_00002929-RA	ENSGALP00000002490
gopAga1_00009471-RA	ENSGALP00000042345
gopAga1_00007297-RA	ENSGALP00000008533
gopAga1_00006401-RA	ENSGALP00000013052
gopAga1_00006095-RA	ENSGALP00000027138
gopAga1_00003722-RD	ENSGALP00000000011
gopAga1_00005592-RA	ENSGALP00000018501
gopAga1_00003890-RA	ENSGALP00000018070
gopAga1_00013528-RA	ENSGALP00000038678
gopAga1_00015158-RA	ENSGALP00000027620
gopAga1_00003018-RA	ENSGALP00000041628
gopAga1_00000597-RA	ENSGALP00000017699
gopAga1_00010755-RA	ENSGALP00000009709
gopAga1_00008451-RA	ENSGALP00000043303
gopAga1_00015150-RA	ENSGALP00000023923
gopAga1_00013256-RA	ENSGALP00000023145
gopAga1_00015884-RA	ENSGALP00000016520
gopAga1_00017082-RA	ENSGALP00000027959
gopAga1_00015622-RA	ENSGALP00000012547
gopAga1_00018381-RA	ENSGALP00000011866
gopAga1_00001637-RA	ENSGALP00000010032
gopAga1_00017796-RA	ENSGALP00000003142
gopAga1_00017178-RA	ENSGALP00000029812
gopAga1_00010625-RA	ENSGALP00000006542
gopAga1_00018004-RA	ENSGALP00000034538
gopAga1_00000916-RA	ENSGALP00000007617
gopAga1_00001083-RA	ENSGALP00000037713
gopAga1_00002786-RB	ENSGALP00000019086
gopAga1_00012397-RA	ENSGALP00000020055
gopAga1_00013002-RA	ENSGALP00000039697
gopAga1_00015798-RA	ENSGALP00000004520
gopAga1_00002519-RB	ENSGALP00000026180
gopAga1_00007039-RA	ENSGALP00000042131
gopAga1_00012911-RA	ENSGALP00000004573
gopAga1_00004407-RA	ENSGALP00000022492
gopAga1_00000980-RA	ENSGALP00000012838
gopAga1_00017168-RA	ENSGALP00000016601
gopAga1_00007884-RA	ENSGALP00000042044
gopAga1_00009386-RA	ENSGALP00000016182
gopAga1_00015545-RA	ENSGALP00000026689
gopAga1_00015056-RA	ENSGALP00000020696
gopAga1_00016651-RA	ENSGALP00000024258
gopAga1_00003918-RA	ENSGALP00000024966
gopAga1_00006538-RA	ENSGALP00000015329
gopAga1_00007697-RA	ENSGALP00000043427
gopAga1_00017688-RA	ENSGALP00000000205
gopAga1_00008772-RA	ENSGALP00000041853
gopAga1_00009795-RA	ENSGALP00000023172
gopAga1_00014978-RA	ENSGALP00000014143
gopAga1_00015749-RA	ENSGALP00000020617
gopAga1_00007771-RA	ENSGALP00000011525
gopAga1_00012586-RA	ENSGALP00000001468
gopAga1_00001539-RA	ENSGALP00000010570
gopAga1_00010387-RA	ENSGALP00000042246
gopAga1_00001342-RA	ENSGALP00000004889
gopAga1_00016441-RA	ENSGALP00000024939
gopAga1_00009525-RA	ENSGALP00000013273
gopAga1_00007409-RA	ENSGALP00000024333
gopAga1_00003540-RA	ENSGALP00000042414
gopAga1_00019166-RC	ENSGALP00000015875
gopAga1_00008912-RA	ENSGALP00000024224
gopAga1_00004133-RA	ENSGALP00000013191
gopAga1_00007171-RA	ENSGALP00000013157
gopAga1_00003312-RA	ENSGALP00000009477
gopAga1_00001905-RA	ENSGALP00000005301
gopAga1_00005122-RB	ENSGALP00000018821
gopAga1_00000951-RA	ENSGALP00000021230
gopAga1_00015958-RB	ENSGALP00000002495
gopAga1_00017106-RA	ENSGALP00000002894
gopAga1_00012979-RA	ENSGALP00000026260
gopAga1_00016677-RA	ENSGALP00000025470
gopAga1_00003853-RA	ENSGALP00000025400
gopAga1_00014386-RA	ENSGALP00000032339
gopAga1_00014403-RA	ENSGALP00000038340
gopAga1_00014699-RA	ENSGALP00000025802
gopAga1_00013882-RA	ENSGALP00000041139
gopAga1_00010598-RA	ENSGALP00000033591
gopAga1_00007401-RB	ENSGALP00000003512
gopAga1_00012152-RA	ENSGALP00000009583
gopAga1_00002398-RA	ENSGALP00000040716
gopAga1_00010548-RC	ENSGALP00000008354
gopAga1_00006342-RA	ENSGALP00000038105
gopAga1_00008633-RA	ENSGALP00000018646
gopAga1_00017401-RA	ENSGALP00000026474
gopAga1_00010157-RA	ENSGALP00000001882
gopAga1_00014334-RA	ENSGALP00000041013
gopAga1_00018043-RA	ENSGALP00000021740
gopAga1_00011158-RA	ENSGALP00000037167
gopAga1_00015264-RA	ENSGALP00000002394
gopAga1_00002644-RA	ENSGALP00000008000
gopAga1_00014825-RA	ENSGALP00000022444
gopAga1_00002860-RB	ENSGALP00000011221
gopAga1_00016765-RA	ENSGALP00000011699
gopAga1_00012299-RA	ENSGALP00000011485
gopAga1_00012299-RC	ENSGALP00000011475
gopAga1_00000540-RB	ENSGALP00000028320
gopAga1_00000092-RA	ENSGALP00000013432
gopAga1_00015937-RA	ENSGALP00000025413
gopAga1_00003746-RA	ENSGALP00000010311
gopAga1_00004168-RA	ENSGALP00000042276
gopAga1_00002016-RA	ENSGALP00000042222
gopAga1_00013626-RA	ENSGALP00000016032
gopAga1_00011763-RA	ENSGALP00000011309
gopAga1_00001544-RA	ENSGALP00000015365
gopAga1_00016019-RA	ENSGALP00000017930
gopAga1_00002689-RA	ENSGALP00000002055
gopAga1_00010862-RA	ENSGALP00000002744
gopAga1_00008932-RC	ENSGALP00000007701
gopAga1_00016867-RA	ENSGALP00000042852
gopAga1_00012297-RA	ENSGALP00000042808
gopAga1_00007188-RA	ENSGALP00000004246
gopAga1_00017389-RA	ENSGALP00000026627
gopAga1_00010045-RA	ENSGALP00000043431
gopAga1_00009950-RA	ENSGALP00000010688
gopAga1_00016968-RA	ENSGALP00000025655
gopAga1_00000039-RA	ENSGALP00000007139
gopAga1_00013749-RB	ENSGALP00000042850
gopAga1_00011884-RA	ENSGALP00000033262
gopAga1_00013126-RA	ENSGALP00000027241
gopAga1_00002723-RA	ENSGALP00000018537
gopAga1_00003353-RC	ENSGALP00000005105
gopAga1_00015038-RA	ENSGALP00000030943
gopAga1_00004433-RA	ENSGALP00000021784
gopAga1_00002284-RA	ENSGALP00000028022
gopAga1_00002604-RA	ENSGALP00000024037
gopAga1_00001829-RA	ENSGALP00000037700
gopAga1_00009096-RA	ENSGALP00000016237
gopAga1_00019398-RA	ENSGALP00000021208
gopAga1_00017214-RA	ENSGALP00000025121
gopAga1_00013304-RA	ENSGALP00000027143
gopAga1_00004667-RA	ENSGALP00000026386
gopAga1_00014999-RA	ENSGALP00000016865
gopAga1_00017251-RA	ENSGALP00000003788
gopAga1_00002972-RA	ENSGALP00000012765
gopAga1_00001647-RB	ENSGALP00000003321
gopAga1_00014559-RA	ENSGALP00000036811
gopAga1_00008475-RA	ENSGALP00000016934
gopAga1_00004532-RA	ENSGALP00000040695
gopAga1_00003452-RA	ENSGALP00000036991
gopAga1_00009338-RA	ENSGALP00000003301
gopAga1_00007391-RA	ENSGALP00000005670
gopAga1_00017209-RA	ENSGALP00000041427
gopAga1_00001990-RA	ENSGALP00000025135
gopAga1_00013932-RA	ENSGALP00000005473
gopAga1_00003910-RA	ENSGALP00000019596
gopAga1_00001357-RA	ENSGALP00000017138
gopAga1_00015354-RA	ENSGALP00000019451
gopAga1_00013279-RA	ENSGALP00000018523
gopAga1_00008664-RA	ENSGALP00000004267
gopAga1_00008944-RF	ENSGALP00000000749
gopAga1_00001757-RB	ENSGALP00000018616
gopAga1_00017048-RA	ENSGALP00000010799
gopAga1_00007196-RA	ENSGALP00000005271
gopAga1_00016567-RA	ENSGALP00000042717
gopAga1_00010069-RA	ENSGALP00000002420
gopAga1_00001119-RA	ENSGALP00000025647
gopAga1_00002272-RA	ENSGALP00000018279
gopAga1_00006556-RB	ENSGALP00000039500
gopAga1_00009643-RA	ENSGALP00000032081
gopAga1_00009210-RA	ENSGALP00000014641
gopAga1_00012042-RD	ENSGALP00000009881
gopAga1_00000805-RA	ENSGALP00000016253
gopAga1_00014257-RA	ENSGALP00000005535
gopAga1_00010685-RA	ENSGALP00000012928
gopAga1_00003001-RA	ENSGALP00000035994
gopAga1_00007123-RA	ENSGALP00000020807
gopAga1_00012811-RB	ENSGALP00000036925
gopAga1_00001017-RF	ENSGALP00000006931
gopAga1_00000409-RA	ENSGALP00000005824
gopAga1_00001405-RB	ENSGALP00000002205
gopAga1_00017750-RA	ENSGALP00000011522
gopAga1_00000658-RA	ENSGALP00000009992
gopAga1_00016068-RA	ENSGALP00000015045
gopAga1_00002189-RA	ENSGALP00000037959
gopAga1_00012950-RA	ENSGALP00000023364
gopAga1_00011268-RA	ENSGALP00000001890
gopAga1_00002921-RA	ENSGALP00000002442
gopAga1_00013967-RA	ENSGALP00000013889
gopAga1_00005327-RA	ENSGALP00000007768
gopAga1_00015480-RA	ENSGALP00000042666
gopAga1_00000998-RA	ENSGALP00000042244
gopAga1_00008574-RA	ENSGALP00000001955
gopAga1_00016409-RA	ENSGALP00000043092
gopAga1_00005491-RA	ENSGALP00000018247
gopAga1_00000116-RA	ENSGALP00000012954
gopAga1_00012088-RA	ENSGALP00000018712
gopAga1_00010759-RA	ENSGALP00000022497
gopAga1_00014819-RA	ENSGALP00000039872
gopAga1_00017080-RA	ENSGALP00000006403
gopAga1_00011634-RA	ENSGALP00000013913
gopAga1_00013263-RA	ENSGALP00000005601
gopAga1_00018484-RA	ENSGALP00000012916
gopAga1_00013196-RA	ENSGALP00000010409
gopAga1_00013502-RA	ENSGALP00000032107
gopAga1_00008028-RA	ENSGALP00000002606
gopAga1_00013998-RA	ENSGALP00000036265
gopAga1_00003742-RA	ENSGALP00000010332
gopAga1_00012012-RA	ENSGALP00000005320
gopAga1_00008162-RA	ENSGALP00000030109
gopAga1_00003911-RA	ENSGALP00000019576
gopAga1_00011281-RA	ENSGALP00000003937
gopAga1_00017651-RA	ENSGALP00000003470
gopAga1_00011673-RA	ENSGALP00000020999
gopAga1_00010097-RA	ENSGALP00000020194
gopAga1_00008572-RA	ENSGALP00000001750
gopAga1_00012351-RA	ENSGALP00000026550
gopAga1_00019094-RA	ENSGALP00000024275
gopAga1_00000142-RA	ENSGALP00000003116
gopAga1_00010751-RA	ENSGALP00000019587
gopAga1_00008193-RA	ENSGALP00000003371
gopAga1_00003638-RA	ENSGALP00000007511
gopAga1_00009769-RA	ENSGALP00000019213
gopAga1_00010534-RA	ENSGALP00000016269
gopAga1_00011152-RA	ENSGALP00000041159
gopAga1_00011980-RB	ENSGALP00000010585
gopAga1_00015492-RA	ENSGALP00000008837
gopAga1_00003670-RA	ENSGALP00000009272
gopAga1_00016392-RA	ENSGALP00000041080
gopAga1_00012998-RA	ENSGALP00000020615
gopAga1_00015226-RA	ENSGALP00000012273
gopAga1_00018852-RA	ENSGALP00000025949
gopAga1_00006596-RA	ENSGALP00000010447
gopAga1_00000623-RA	ENSGALP00000016337
gopAga1_00017610-RA	ENSGALP00000036509
gopAga1_00004218-RB	ENSGALP00000003374
gopAga1_00014676-RA	ENSGALP00000006468
gopAga1_00004277-RA	ENSGALP00000043400
gopAga1_00013387-RA	ENSGALP00000024360
gopAga1_00013238-RA	ENSGALP00000026488
gopAga1_00005859-RA	ENSGALP00000013250
gopAga1_00000790-RA	ENSGALP00000014189
gopAga1_00015126-RA	ENSGALP00000015826
gopAga1_00006321-RA	ENSGALP00000019401
gopAga1_00010933-RA	ENSGALP00000027665
gopAga1_00015779-RA	ENSGALP00000013183
gopAga1_00016285-RA	ENSGALP00000011520
gopAga1_00008514-RA	ENSGALP00000008988
gopAga1_00011470-RC	ENSGALP00000004091
gopAga1_00016533-RA	ENSGALP00000037343
gopAga1_00000646-RA	ENSGALP00000010059
gopAga1_00005549-RA	ENSGALP00000041791
gopAga1_00014296-RA	ENSGALP00000006184
gopAga1_00003456-RA	ENSGALP00000036962
gopAga1_00005691-RA	ENSGALP00000026414
gopAga1_00003888-RA	ENSGALP00000018082
gopAga1_00018669-RA	ENSGALP00000014375
gopAga1_00005906-RA	ENSGALP00000004606
gopAga1_00011179-RA	ENSGALP00000004054
gopAga1_00015473-RA	ENSGALP00000042058
gopAga1_00009166-RA	ENSGALP00000015447
gopAga1_00006645-RA	ENSGALP00000001994
gopAga1_00007175-RA	ENSGALP00000025719
gopAga1_00001039-RA	ENSGALP00000006699
gopAga1_00013543-RA	ENSGALP00000040481
gopAga1_00002924-RA	ENSGALP00000038429
gopAga1_00016389-RA	ENSGALP00000025600
gopAga1_00004628-RA	ENSGALP00000023879
gopAga1_00002642-RA	ENSGALP00000039859
gopAga1_00008591-RA	ENSGALP00000017674
gopAga1_00003197-RA	ENSGALP00000014745
gopAga1_00012725-RA	ENSGALP00000003997
gopAga1_00003656-RA	ENSGALP00000002701
gopAga1_00013757-RA	ENSGALP00000022972
gopAga1_00016803-RA	ENSGALP00000021829
gopAga1_00009718-RA	ENSGALP00000001091
gopAga1_00015981-RA	ENSGALP00000026843
gopAga1_00010330-RA	ENSGALP00000017123
gopAga1_00002869-RA	ENSGALP00000014154
gopAga1_00005002-RA	ENSGALP00000041711
gopAga1_00013862-RA	ENSGALP00000042674
gopAga1_00002391-RA	ENSGALP00000040836
gopAga1_00002364-RA	ENSGALP00000006412
gopAga1_00002949-RA	ENSGALP00000007534
gopAga1_00002579-RA	ENSGALP00000026457
gopAga1_00015299-RA	ENSGALP00000013803
gopAga1_00004958-RA	ENSGALP00000009255
gopAga1_00012723-RA	ENSGALP00000024084
gopAga1_00007727-RA	ENSGALP00000014582
gopAga1_00003416-RA	ENSGALP00000008766
gopAga1_00000009-RA	ENSGALP00000039221
gopAga1_00006870-RA	ENSGALP00000041812
gopAga1_00004728-RA	ENSGALP00000025356
gopAga1_00003883-RA	ENSGALP00000015217
gopAga1_00000801-RA	ENSGALP00000032884
gopAga1_00005307-RA	ENSGALP00000007232
gopAga1_00006960-RB	ENSGALP00000020735
gopAga1_00019047-RA	ENSGALP00000041541
gopAga1_00003557-RA	ENSGALP00000018654
gopAga1_00016029-RA	ENSGALP00000006162
gopAga1_00015302-RA	ENSGALP00000025249
gopAga1_00011888-RA	ENSGALP00000009665
gopAga1_00000492-RA	ENSGALP00000027213
gopAga1_00000510-RB	ENSGALP00000002297
gopAga1_00012659-RB	ENSGALP00000004244
gopAga1_00009143-RA	ENSGALP00000006182
gopAga1_00004223-RA	ENSGALP00000003261
gopAga1_00011206-RA	ENSGALP00000002888
gopAga1_00006725-RA	ENSGALP00000011130
gopAga1_00004369-RA	ENSGALP00000004298
gopAga1_00008688-RA	ENSGALP00000019361
gopAga1_00003392-RA	ENSGALP00000013522
gopAga1_00014423-RA	ENSGALP00000031115
gopAga1_00013706-RA	ENSGALP00000020057
gopAga1_00013789-RA	ENSGALP00000027065
gopAga1_00001622-RA	ENSGALP00000012171
gopAga1_00004842-RA	ENSGALP00000026865
gopAga1_00001111-RA	ENSGALP00000022811
gopAga1_00001032-RA	ENSGALP00000039717
gopAga1_00003693-RB	ENSGALP00000013420
gopAga1_00007967-RA	ENSGALP00000005469
gopAga1_00019558-RA	ENSGALP00000026472
gopAga1_00017478-RA	ENSGALP00000000823
gopAga1_00008866-RA	ENSGALP00000010335
gopAga1_00011117-RA	ENSGALP00000043211
gopAga1_00011445-RB	ENSGALP00000039481
gopAga1_00019626-RB	ENSGALP00000021646
gopAga1_00016951-RB	ENSGALP00000005308
gopAga1_00008274-RA	ENSGALP00000023266
gopAga1_00000850-RC	ENSGALP00000040617
gopAga1_00006909-RA	ENSGALP00000040446
gopAga1_00017756-RB	ENSGALP00000026123
gopAga1_00014768-RA	ENSGALP00000027932
gopAga1_00013105-RA	ENSGALP00000016366
gopAga1_00006714-RA	ENSGALP00000013669
gopAga1_00014760-RA	ENSGALP00000010097
gopAga1_00012081-RA	ENSGALP00000006256
gopAga1_00002072-RA	ENSGALP00000041264
gopAga1_00009504-RA	ENSGALP00000026271
gopAga1_00010530-RA	ENSGALP00000016181
gopAga1_00015575-RA	ENSGALP00000005087
gopAga1_00013215-RA	ENSGALP00000026313
gopAga1_00009257-RA	ENSGALP00000014100
gopAga1_00017292-RA	ENSGALP00000000742
gopAga1_00009531-RA	ENSGALP00000029403
gopAga1_00008737-RA	ENSGALP00000024707
gopAga1_00002513-RA	ENSGALP00000003758
gopAga1_00003329-RA	ENSGALP00000009468
gopAga1_00001159-RA	ENSGALP00000010742
gopAga1_00013708-RA	ENSGALP00000029955
gopAga1_00002320-RD	ENSGALP00000003718
gopAga1_00014120-RA	ENSGALP00000024468
gopAga1_00018189-RA	ENSGALP00000000727
gopAga1_00006103-RA	ENSGALP00000041218
gopAga1_00014375-RB	ENSGALP00000006720
gopAga1_00005441-RA	ENSGALP00000008415
gopAga1_00008668-RA	ENSGALP00000004248
gopAga1_00018947-RA	ENSGALP00000039261
gopAga1_00008062-RB	ENSGALP00000007644
gopAga1_00002228-RA	ENSGALP00000003710
gopAga1_00008809-RA	ENSGALP00000014124
gopAga1_00001915-RA	ENSGALP00000034287
gopAga1_00009542-RA	ENSGALP00000027441
gopAga1_00013347-RA	ENSGALP00000004028
gopAga1_00000746-RA	ENSGALP00000015593
gopAga1_00008595-RA	ENSGALP00000004581
gopAga1_00012789-RA	ENSGALP00000017453
gopAga1_00008692-RA	ENSGALP00000043221
gopAga1_00006369-RA	ENSGALP00000003582
gopAga1_00002454-RA	ENSGALP00000005827
gopAga1_00006213-RA	ENSGALP00000004671
gopAga1_00012563-RA	ENSGALP00000025948
gopAga1_00016773-RA	ENSGALP00000032704
gopAga1_00003041-RA	ENSGALP00000012558
gopAga1_00014474-RA	ENSGALP00000041877
gopAga1_00005665-RA	ENSGALP00000042434
gopAga1_00002366-RA	ENSGALP00000041858
gopAga1_00018540-RA	ENSGALP00000018195
gopAga1_00012479-RA	ENSGALP00000041075
gopAga1_00013866-RA	ENSGALP00000020840
gopAga1_00008650-RA	ENSGALP00000027532
gopAga1_00001057-RA	ENSGALP00000011605
gopAga1_00002973-RA	ENSGALP00000012793
gopAga1_00009212-RA	ENSGALP00000014566
gopAga1_00003116-RA	ENSGALP00000021003
gopAga1_00006088-RA	ENSGALP00000037008
gopAga1_00012836-RA	ENSGALP00000020802
gopAga1_00009159-RB	ENSGALP00000028898
gopAga1_00004654-RA	ENSGALP00000015229
gopAga1_00002162-RA	ENSGALP00000026380
gopAga1_00009663-RC	ENSGALP00000019667
gopAga1_00012884-RA	ENSGALP00000026052
gopAga1_00019353-RA	ENSGALP00000015213
gopAga1_00015648-RA	ENSGALP00000020376
gopAga1_00005517-RA	ENSGALP00000020651
gopAga1_00014106-RA	ENSGALP00000017666
gopAga1_00003614-RA	ENSGALP00000020070
gopAga1_00011535-RA	ENSGALP00000013846
gopAga1_00011699-RB	ENSGALP00000005334
gopAga1_00000107-RA	ENSGALP00000006780
gopAga1_00005398-RA	ENSGALP00000008128
gopAga1_00010913-RA	ENSGALP00000041646
gopAga1_00002683-RA	ENSGALP00000001900
gopAga1_00009410-RA	ENSGALP00000001622
gopAga1_00014205-RA	ENSGALP00000021014
gopAga1_00018659-RA	ENSGALP00000001321
gopAga1_00013078-RA	ENSGALP00000042112
gopAga1_00001456-RA	ENSGALP00000003001
gopAga1_00003350-RA	ENSGALP00000005033
gopAga1_00000211-RA	ENSGALP00000005960
gopAga1_00002902-RA	ENSGALP00000001263
gopAga1_00014427-RA	ENSGALP00000002426
gopAga1_00007871-RA	ENSGALP00000041169
gopAga1_00017136-RB	ENSGALP00000041750
gopAga1_00018344-RA	ENSGALP00000031708
gopAga1_00006820-RA	ENSGALP00000023047
gopAga1_00007231-RA	ENSGALP00000022480
gopAga1_00012579-RA	ENSGALP00000038659
gopAga1_00016383-RA	ENSGALP00000024145
gopAga1_00013313-RB	ENSGALP00000020427
gopAga1_00002139-RA	ENSGALP00000006887
gopAga1_00007386-RB	ENSGALP00000023709
gopAga1_00000706-RA	ENSGALP00000025791
gopAga1_00018148-RA	ENSGALP00000002144
gopAga1_00004974-RA	ENSGALP00000043443
gopAga1_00017067-RA	ENSGALP00000017451
gopAga1_00016572-RB	ENSGALP00000017954
gopAga1_00000191-RA	ENSGALP00000013507
gopAga1_00005290-RA	ENSGALP00000016655
gopAga1_00016021-RA	ENSGALP00000017823
gopAga1_00004888-RB	ENSGALP00000000594
gopAga1_00010817-RA	ENSGALP00000008566
gopAga1_00003166-RA	ENSGALP00000011851
gopAga1_00005742-RA	ENSGALP00000041351
gopAga1_00002469-RA	ENSGALP00000002338
gopAga1_00005850-RA	ENSGALP00000025393
gopAga1_00008884-RA	ENSGALP00000033552
gopAga1_00010589-RA	ENSGALP00000038235
gopAga1_00013563-RA	ENSGALP00000027928
gopAga1_00017920-RA	ENSGALP00000012708
gopAga1_00017623-RA	ENSGALP00000013516
gopAga1_00004513-RB	ENSGALP00000021481
gopAga1_00007370-RA	ENSGALP00000034517
gopAga1_00016697-RB	ENSGALP00000038446
gopAga1_00014524-RA	ENSGALP00000022602
gopAga1_00006507-RA	ENSGALP00000037814
gopAga1_00003863-RA	ENSGALP00000032614
gopAga1_00000859-RA	ENSGALP00000007125
gopAga1_00017184-RA	ENSGALP00000017592
gopAga1_00011548-RA	ENSGALP00000026363
gopAga1_00009230-RA	ENSGALP00000013350
gopAga1_00009546-RB	ENSGALP00000010357
gopAga1_00011337-RA	ENSGALP00000004753
gopAga1_00013419-RA	ENSGALP00000007052
gopAga1_00008953-RA	ENSGALP00000001132
gopAga1_00002246-RB	ENSGALP00000013215
gopAga1_00002710-RA	ENSGALP00000013996
gopAga1_00010798-RA	ENSGALP00000011595
gopAga1_00005587-RA	ENSGALP00000042490
gopAga1_00004314-RB	ENSGALP00000016869
gopAga1_00015194-RA	ENSGALP00000042217
gopAga1_00013539-RA	ENSGALP00000007747
gopAga1_00016069-RA	ENSGALP00000024250
gopAga1_00000153-RA	ENSGALP00000034525
gopAga1_00009474-RB	ENSGALP00000003740
gopAga1_00015562-RA	ENSGALP00000001229
gopAga1_00012311-RA	ENSGALP00000006575
gopAga1_00006427-RA	ENSGALP00000033089
gopAga1_00006035-RA	ENSGALP00000034981
gopAga1_00015887-RC	ENSGALP00000014318
gopAga1_00009909-RA	ENSGALP00000000070
gopAga1_00000322-RA	ENSGALP00000008665
gopAga1_00016793-RA	ENSGALP00000043011
gopAga1_00018193-RA	ENSGALP00000009549
gopAga1_00001118-RA	ENSGALP00000025658
gopAga1_00015358-RA	ENSGALP00000008663
gopAga1_00005285-RA	ENSGALP00000022087
gopAga1_00008681-RA	ENSGALP00000020171
gopAga1_00019295-RA	ENSGALP00000001445
gopAga1_00007028-RA	ENSGALP00000022278
gopAga1_00008059-RA	ENSGALP00000007709
gopAga1_00001366-RB	ENSGALP00000026442
gopAga1_00013109-RA	ENSGALP00000001157
gopAga1_00000003-RA	ENSGALP00000042218
gopAga1_00008852-RA	ENSGALP00000014321
gopAga1_00006239-RA	ENSGALP00000020328
gopAga1_00007796-RA	ENSGALP00000015257
gopAga1_00005085-RA	ENSGALP00000006242
gopAga1_00014311-RA	ENSGALP00000012790
gopAga1_00001557-RA	ENSGALP00000012019
gopAga1_00013471-RB	ENSGALP00000010625
gopAga1_00012366-RA	ENSGALP00000041053
gopAga1_00012772-RA	ENSGALP00000043059
gopAga1_00010084-RA	ENSGALP00000019940
gopAga1_00000165-RA	ENSGALP00000011314
gopAga1_00011840-RA	ENSGALP00000010477
gopAga1_00009490-RA	ENSGALP00000002647
gopAga1_00011300-RA	ENSGALP00000020548
gopAga1_00008407-RA	ENSGALP00000005345
gopAga1_00007384-RA	ENSGALP00000041579
gopAga1_00013597-RA	ENSGALP00000032131
gopAga1_00001307-RA	ENSGALP00000007339
gopAga1_00001983-RA	ENSGALP00000033490
gopAga1_00018623-RA	ENSGALP00000022756
gopAga1_00008205-RB	ENSGALP00000001986
gopAga1_00017390-RA	ENSGALP00000026055
gopAga1_00016843-RA	ENSGALP00000018042
gopAga1_00017065-RA	ENSGALP00000040959
gopAga1_00001254-RA	ENSGALP00000040518
gopAga1_00013764-RA	ENSGALP00000025900
gopAga1_00004411-RA	ENSGALP00000019945
gopAga1_00005288-RA	ENSGALP00000016680
gopAga1_00014893-RB	ENSGALP00000018164
gopAga1_00009953-RA	ENSGALP00000041795
gopAga1_00008794-RA	ENSGALP00000005357
gopAga1_00015163-RA	ENSGALP00000013160
gopAga1_00002934-RA	ENSGALP00000007175
gopAga1_00005645-RA	ENSGALP00000009866
gopAga1_00008377-RA	ENSGALP00000004369
gopAga1_00018793-RA	ENSGALP00000039941
gopAga1_00016640-RA	ENSGALP00000033702
gopAga1_00001808-RA	ENSGALP00000040783
gopAga1_00004284-RA	ENSGALP00000017381
gopAga1_00005227-RA	ENSGALP00000023383
gopAga1_00008766-RA	ENSGALP00000015334
gopAga1_00018205-RA	ENSGALP00000023854
gopAga1_00006175-RA	ENSGALP00000022268
gopAga1_00014716-RA	ENSGALP00000004344
gopAga1_00014864-RB	ENSGALP00000004568
gopAga1_00005622-RA	ENSGALP00000043058
gopAga1_00002031-RA	ENSGALP00000003523
gopAga1_00015773-RC	ENSGALP00000021686
gopAga1_00014803-RB	ENSGALP00000041546
gopAga1_00014189-RA	ENSGALP00000003129
gopAga1_00006413-RA	ENSGALP00000032500
gopAga1_00011825-RA	ENSGALP00000010262
gopAga1_00005854-RA	ENSGALP00000020568
gopAga1_00015281-RG	ENSGALP00000041536
gopAga1_00016429-RA	ENSGALP00000004727
gopAga1_00015933-RC	ENSGALP00000004388
gopAga1_00000524-RC	ENSGALP00000001464
gopAga1_00008959-RA	ENSGALP00000021086
gopAga1_00012801-RA	ENSGALP00000024396
gopAga1_00011910-RA	ENSGALP00000024878
gopAga1_00010561-RA	ENSGALP00000042593
gopAga1_00013554-RA	ENSGALP00000020268
gopAga1_00009679-RB	ENSGALP00000023165
gopAga1_00005577-RA	ENSGALP00000024153
gopAga1_00002003-RA	ENSGALP00000001006
gopAga1_00003045-RA	ENSGALP00000008562
gopAga1_00009714-RA	ENSGALP00000034141
gopAga1_00012733-RA	ENSGALP00000043447
gopAga1_00012119-RB	ENSGALP00000034674
gopAga1_00014104-RA	ENSGALP00000026567
gopAga1_00006848-RA	ENSGALP00000010998
gopAga1_00004207-RA	ENSGALP00000041135
gopAga1_00009945-RA	ENSGALP00000041390
gopAga1_00005786-RA	ENSGALP00000017738
gopAga1_00012065-RA	ENSGALP00000035780
gopAga1_00012920-RA	ENSGALP00000013932
gopAga1_00003112-RA	ENSGALP00000005823
gopAga1_00003728-RA	ENSGALP00000037883
gopAga1_00009321-RA	ENSGALP00000025680
gopAga1_00014478-RA	ENSGALP00000002536
gopAga1_00002647-RA	ENSGALP00000007966
gopAga1_00014096-RA	ENSGALP00000010837
gopAga1_00008678-RA	ENSGALP00000040989
gopAga1_00011347-RA	ENSGALP00000043385
gopAga1_00008518-RA	ENSGALP00000009154
gopAga1_00005079-RA	ENSGALP00000015892
gopAga1_00013083-RA	ENSGALP00000000157
gopAga1_00017893-RA	ENSGALP00000043107
gopAga1_00006804-RA	ENSGALP00000008112
gopAga1_00002838-RA	ENSGALP00000014423
gopAga1_00014482-RA	ENSGALP00000042347
gopAga1_00000157-RI	ENSGALP00000039597
gopAga1_00008050-RA	ENSGALP00000008286
gopAga1_00004177-RD	ENSGALP00000011339
gopAga1_00010240-RA	ENSGALP00000018229
gopAga1_00005814-RB	ENSGALP00000011312
gopAga1_00007579-RA	ENSGALP00000017469
gopAga1_00007420-RA	ENSGALP00000015655
gopAga1_00005518-RA	ENSGALP00000012060
gopAga1_00011257-RA	ENSGALP00000025011
gopAga1_00017929-RA	ENSGALP00000039039
gopAga1_00001723-RA	ENSGALP00000029412
gopAga1_00011362-RA	ENSGALP00000030955
gopAga1_00014440-RA	ENSGALP00000013835
gopAga1_00016386-RA	ENSGALP00000028012
gopAga1_00000498-RB	ENSGALP00000013340
gopAga1_00011419-RA	ENSGALP00000013837
gopAga1_00005474-RA	ENSGALP00000007639
gopAga1_00008063-RA	ENSGALP00000039951
gopAga1_00002558-RC	ENSGALP00000022457
gopAga1_00017564-RA	ENSGALP00000011031
gopAga1_00015440-RA	ENSGALP00000012035
gopAga1_00019062-RA	ENSGALP00000041147
gopAga1_00005191-RA	ENSGALP00000025032
gopAga1_00012940-RA	ENSGALP00000000351
gopAga1_00005041-RA	ENSGALP00000009892
gopAga1_00017764-RA	ENSGALP00000042419
gopAga1_00005100-RA	ENSGALP00000034637
gopAga1_00005292-RA	ENSGALP00000036103
gopAga1_00008640-RA	ENSGALP00000022882
gopAga1_00007957-RA	ENSGALP00000008344
gopAga1_00005601-RA	ENSGALP00000025593
gopAga1_00014227-RA	ENSGALP00000011393
gopAga1_00003926-RA	ENSGALP00000040167
gopAga1_00007235-RA	ENSGALP00000027030
gopAga1_00011105-RA	ENSGALP00000042281
gopAga1_00016558-RA	ENSGALP00000035061
gopAga1_00007445-RA	ENSGALP00000010089
gopAga1_00014689-RA	ENSGALP00000026599
gopAga1_00002922-RA	ENSGALP00000002451
gopAga1_00016028-RA	ENSGALP00000006157
gopAga1_00018630-RB	ENSGALP00000025717
gopAga1_00014597-RA	ENSGALP00000031343
gopAga1_00010895-RA	ENSGALP00000016663
gopAga1_00011697-RA	ENSGALP00000005410
gopAga1_00011822-RA	ENSGALP00000010279
gopAga1_00004490-RA	ENSGALP00000008763
gopAga1_00010335-RA	ENSGALP00000012341
gopAga1_00016216-RA	ENSGALP00000012460
gopAga1_00013816-RA	ENSGALP00000042746
gopAga1_00017173-RA	ENSGALP00000041655
gopAga1_00007739-RA	ENSGALP00000016627
gopAga1_00002184-RA	ENSGALP00000021140
gopAga1_00000596-RA	ENSGALP00000023559
gopAga1_00003360-RA	ENSGALP00000012399
gopAga1_00009886-RA	ENSGALP00000043227
gopAga1_00005072-RA	ENSGALP00000022947
gopAga1_00018223-RA	ENSGALP00000021752
gopAga1_00017450-RA	ENSGALP00000042449
gopAga1_00004038-RB	ENSGALP00000006022
gopAga1_00016277-RA	ENSGALP00000023940
gopAga1_00001658-RA	ENSGALP00000043432
gopAga1_00010453-RA	ENSGALP00000043462
gopAga1_00017706-RA	ENSGALP00000022679
gopAga1_00000752-RA	ENSGALP00000042025
gopAga1_00006789-RA	ENSGALP00000004078
gopAga1_00005315-RA	ENSGALP00000008962
gopAga1_00019375-RA	ENSGALP00000013449
gopAga1_00009113-RA	ENSGALP00000036086
gopAga1_00000944-RA	ENSGALP00000000625
gopAga1_00003550-RA	ENSGALP00000004804
gopAga1_00011592-RA	ENSGALP00000042412
gopAga1_00008957-RA	ENSGALP00000021084
gopAga1_00007374-RA	ENSGALP00000022809
gopAga1_00009638-RA	ENSGALP00000007963
gopAga1_00003963-RA	ENSGALP00000013642
gopAga1_00005481-RA	ENSGALP00000003205
gopAga1_00007430-RD	ENSGALP00000023166
gopAga1_00003518-RB	ENSGALP00000012920
gopAga1_00004191-RA	ENSGALP00000011668
gopAga1_00002501-RA	ENSGALP00000004383
gopAga1_00002345-RA	ENSGALP00000011186
gopAga1_00004203-RA	ENSGALP00000027572
gopAga1_00006492-RA	ENSGALP00000030827
gopAga1_00009009-RA	ENSGALP00000000719
gopAga1_00016490-RA	ENSGALP00000009122
gopAga1_00009310-RA	ENSGALP00000043061
gopAga1_00002079-RA	ENSGALP00000002364
gopAga1_00019480-RA	ENSGALP00000019152
gopAga1_00003004-RA	ENSGALP00000014703
gopAga1_00009805-RA	ENSGALP00000018502
gopAga1_00011523-RA	ENSGALP00000018846
gopAga1_00019241-RA	ENSGALP00000020311
gopAga1_00005991-RA	ENSGALP00000043069
gopAga1_00008726-RA	ENSGALP00000042794
gopAga1_00000422-RA	ENSGALP00000010221
gopAga1_00003516-RA	ENSGALP00000012911
gopAga1_00011687-RA	ENSGALP00000015802
gopAga1_00013913-RA	ENSGALP00000036016
gopAga1_00002470-RB	ENSGALP00000002304
gopAga1_00009352-RA	ENSGALP00000016465
gopAga1_00008814-RA	ENSGALP00000042417
gopAga1_00019378-RA	ENSGALP00000012687
gopAga1_00006495-RA	ENSGALP00000011131
gopAga1_00006642-RA	ENSGALP00000010701
gopAga1_00018567-RA	ENSGALP00000033652
gopAga1_00018195-RA	ENSGALP00000030099
gopAga1_00015133-RA	ENSGALP00000040860
gopAga1_00014315-RA	ENSGALP00000016843
gopAga1_00011539-RA	ENSGALP00000007031
gopAga1_00008981-RA	ENSGALP00000038183
gopAga1_00019245-RA	ENSGALP00000002935
gopAga1_00000984-RA	ENSGALP00000017346
gopAga1_00012528-RA	ENSGALP00000014265
gopAga1_00010064-RA	ENSGALP00000039912
gopAga1_00011461-RB	ENSGALP00000035601
gopAga1_00007343-RA	ENSGALP00000025001
gopAga1_00011899-RA	ENSGALP00000018765
gopAga1_00017408-RA	ENSGALP00000009409
gopAga1_00013938-RA	ENSGALP00000002726
gopAga1_00013938-RB	ENSGALP00000040616
gopAga1_00007792-RA	ENSGALP00000014145
gopAga1_00015528-RA	ENSGALP00000030178
gopAga1_00000304-RI	ENSGALP00000027263
gopAga1_00000446-RA	ENSGALP00000003259
gopAga1_00000775-RA	ENSGALP00000017170
gopAga1_00009757-RA	ENSGALP00000026875
gopAga1_00014491-RA	ENSGALP00000024554
gopAga1_00001377-RC	ENSGALP00000043135
gopAga1_00012663-RA	ENSGALP00000026148
gopAga1_00011934-RA	ENSGALP00000012485
gopAga1_00018880-RA	ENSGALP00000018565
gopAga1_00006846-RA	ENSGALP00000043317
gopAga1_00014823-RB	ENSGALP00000013703
gopAga1_00005083-RA	ENSGALP00000006125
gopAga1_00013227-RA	ENSGALP00000023829
gopAga1_00010489-RA	ENSGALP00000036625
gopAga1_00003792-RA	ENSGALP00000030714
gopAga1_00010481-RA	ENSGALP00000035504
gopAga1_00015517-RA	ENSGALP00000032474
gopAga1_00012543-RA	ENSGALP00000005909
gopAga1_00013301-RA	ENSGALP00000017642
gopAga1_00006349-RA	ENSGALP00000019752
gopAga1_00005006-RA	ENSGALP00000028143
gopAga1_00012400-RA	ENSGALP00000037897
gopAga1_00016792-RA	ENSGALP00000011862
gopAga1_00005680-RB	ENSGALP00000017542
gopAga1_00009478-RB	ENSGALP00000003878
gopAga1_00016610-RA	ENSGALP00000004034
gopAga1_00000540-RA	ENSGALP00000012018
gopAga1_00004601-RA	ENSGALP00000022902
gopAga1_00012123-RA	ENSGALP00000013036
gopAga1_00013024-RA	ENSGALP00000021168
gopAga1_00009681-RA	ENSGALP00000001322
gopAga1_00014815-RA	ENSGALP00000019967
gopAga1_00002506-RA	ENSGALP00000001799
gopAga1_00013233-RA	ENSGALP00000003536
gopAga1_00014339-RA	ENSGALP00000011409
gopAga1_00012069-RA	ENSGALP00000007362
gopAga1_00008520-RA	ENSGALP00000037334
gopAga1_00000381-RA	ENSGALP00000024778
gopAga1_00011322-RA	ENSGALP00000014737
gopAga1_00001981-RA	ENSGALP00000033469
gopAga1_00002750-RA	ENSGALP00000032950
gopAga1_00013884-RA	ENSGALP00000012990
gopAga1_00011411-RA	ENSGALP00000042910
gopAga1_00008024-RA	ENSGALP00000002138
gopAga1_00011373-RD	ENSGALP00000039890
gopAga1_00009205-RA	ENSGALP00000015825
gopAga1_00007908-RA	ENSGALP00000042431
gopAga1_00007201-RA	ENSGALP00000005336
gopAga1_00008753-RA	ENSGALP00000003291
gopAga1_00008811-RB	ENSGALP00000014371
gopAga1_00007702-RA	ENSGALP00000043374
gopAga1_00013876-RB	ENSGALP00000025299
gopAga1_00008624-RA	ENSGALP00000042710
gopAga1_00004519-RA	ENSGALP00000023737
gopAga1_00001654-RA	ENSGALP00000028533
gopAga1_00004151-RA	ENSGALP00000033454
gopAga1_00018698-RA	ENSGALP00000009988
gopAga1_00018015-RA	ENSGALP00000003034
gopAga1_00000546-RA	ENSGALP00000021477
gopAga1_00000094-RB	ENSGALP00000013480
gopAga1_00007136-RA	ENSGALP00000037276
gopAga1_00000903-RA	ENSGALP00000008062
gopAga1_00013269-RA	ENSGALP00000004058
gopAga1_00015327-RA	ENSGALP00000005304
gopAga1_00004778-RA	ENSGALP00000026164
gopAga1_00010844-RA	ENSGALP00000035460
gopAga1_00019945-RA	ENSGALP00000038403
gopAga1_00016508-RA	ENSGALP00000005682
gopAga1_00008265-RA	ENSGALP00000008023
gopAga1_00012548-RA	ENSGALP00000006674
gopAga1_00000248-RA	ENSGALP00000009598
gopAga1_00019322-RA	ENSGALP00000026206
gopAga1_00005124-RA	ENSGALP00000040786
gopAga1_00018506-RB	ENSGALP00000019918
gopAga1_00017330-RA	ENSGALP00000030215
gopAga1_00017548-RA	ENSGALP00000016357
gopAga1_00015601-RA	ENSGALP00000004392
gopAga1_00011459-RA	ENSGALP00000018171
gopAga1_00008892-RA	ENSGALP00000002030
gopAga1_00000272-RA	ENSGALP00000027118
gopAga1_00014352-RA	ENSGALP00000029906
gopAga1_00013432-RC	ENSGALP00000038800
gopAga1_00006469-RA	ENSGALP00000000666
gopAga1_00008708-RA	ENSGALP00000019082
gopAga1_00001338-RA	ENSGALP00000024336
gopAga1_00000236-RA	ENSGALP00000004845
gopAga1_00014468-RA	ENSGALP00000013538
gopAga1_00004819-RA	ENSGALP00000014260
gopAga1_00010760-RA	ENSGALP00000022482
gopAga1_00007976-RA	ENSGALP00000023991
gopAga1_00014528-RA	ENSGALP00000014700
gopAga1_00003767-RA	ENSGALP00000004449
gopAga1_00019042-RA	ENSGALP00000027829
gopAga1_00005109-RA	ENSGALP00000038654
gopAga1_00006138-RA	ENSGALP00000004810
gopAga1_00003901-RA	ENSGALP00000031130
gopAga1_00007016-RA	ENSGALP00000020656
gopAga1_00001518-RK	ENSGALP00000010932
gopAga1_00012221-RA	ENSGALP00000016692
gopAga1_00015821-RA	ENSGALP00000027288
gopAga1_00011287-RA	ENSGALP00000027070
gopAga1_00001760-RB	ENSGALP00000039533
gopAga1_00018199-RA	ENSGALP00000011452
gopAga1_00013434-RA	ENSGALP00000042702
gopAga1_00006834-RA	ENSGALP00000033760
gopAga1_00005495-RA	ENSGALP00000041479
gopAga1_00002309-RA	ENSGALP00000008235
gopAga1_00006881-RA	ENSGALP00000003128
gopAga1_00010833-RD	ENSGALP00000009480
gopAga1_00014394-RA	ENSGALP00000016453
gopAga1_00015540-RA	ENSGALP00000015287
gopAga1_00008226-RA	ENSGALP00000008158
gopAga1_00009046-RA	ENSGALP00000011091
gopAga1_00015899-RA	ENSGALP00000012817
gopAga1_00010410-RA	ENSGALP00000042802
gopAga1_00015120-RA	ENSGALP00000041066
gopAga1_00012936-RA	ENSGALP00000021146
gopAga1_00019459-RA	ENSGALP00000004000
gopAga1_00007730-RA	ENSGALP00000038005
gopAga1_00016715-RA	ENSGALP00000024753
gopAga1_00001289-RA	ENSGALP00000007007
gopAga1_00012487-RA	ENSGALP00000024470
gopAga1_00006164-RA	ENSGALP00000001578
gopAga1_00006624-RA	ENSGALP00000010868
gopAga1_00014644-RA	ENSGALP00000027884
gopAga1_00000628-RA	ENSGALP00000010695
gopAga1_00006297-RA	ENSGALP00000008417
gopAga1_00017828-RA	ENSGALP00000003770
gopAga1_00000732-RA	ENSGALP00000017136
gopAga1_00009487-RB	ENSGALP00000002546
gopAga1_00000592-RA	ENSGALP00000013497
gopAga1_00004345-RA	ENSGALP00000017983
gopAga1_00009147-RA	ENSGALP00000000246
gopAga1_00009491-RA	ENSGALP00000011509
gopAga1_00003473-RA	ENSGALP00000042323
gopAga1_00002199-RA	ENSGALP00000020629
gopAga1_00011976-RA	ENSGALP00000006411
gopAga1_00000528-RA	ENSGALP00000001494
gopAga1_00006590-RA	ENSGALP00000007804
gopAga1_00008562-RB	ENSGALP00000037994
gopAga1_00001581-RA	ENSGALP00000037708
gopAga1_00002655-RC	ENSGALP00000043197
gopAga1_00013982-RB	ENSGALP00000028630
gopAga1_00000169-RA	ENSGALP00000012329
gopAga1_00002673-RA	ENSGALP00000001595
gopAga1_00018046-RA	ENSGALP00000027449
gopAga1_00001049-RA	ENSGALP00000039159
gopAga1_00007852-RB	ENSGALP00000027754
gopAga1_00010720-RA	ENSGALP00000013870
gopAga1_00013731-RA	ENSGALP00000018157
gopAga1_00008140-RA	ENSGALP00000027399
gopAga1_00013919-RA	ENSGALP00000003577
gopAga1_00018141-RA	ENSGALP00000002982
gopAga1_00006583-RA	ENSGALP00000003035
gopAga1_00003400-RB	ENSGALP00000015425
gopAga1_00015853-RA	ENSGALP00000008089
gopAga1_00007138-RA	ENSGALP00000024538
gopAga1_00003024-RA	ENSGALP00000040939
gopAga1_00007418-RA	ENSGALP00000015615
gopAga1_00011012-RA	ENSGALP00000001715
gopAga1_00010319-RA	ENSGALP00000015357
gopAga1_00010280-RA	ENSGALP00000010258
gopAga1_00007539-RA	ENSGALP00000026019
gopAga1_00009660-RA	ENSGALP00000024681
gopAga1_00000463-RA	ENSGALP00000005973
gopAga1_00010160-RA	ENSGALP00000009523
gopAga1_00009145-RA	ENSGALP00000008240
gopAga1_00017865-RA	ENSGALP00000042451
gopAga1_00004937-RA	ENSGALP00000010630
gopAga1_00009253-RA	ENSGALP00000010511
gopAga1_00012946-RA	ENSGALP00000023449
gopAga1_00015057-RA	ENSGALP00000020691
gopAga1_00010878-RA	ENSGALP00000021696
gopAga1_00006149-RA	ENSGALP00000010214
gopAga1_00005198-RA	ENSGALP00000022893
gopAga1_00010938-RA	ENSGALP00000004283
gopAga1_00007454-RA	ENSGALP00000042388
gopAga1_00000494-RA	ENSGALP00000027220
gopAga1_00001694-RA	ENSGALP00000041620
gopAga1_00005215-RA	ENSGALP00000040776
gopAga1_00016504-RA	ENSGALP00000024384
gopAga1_00009666-RA	ENSGALP00000010835
gopAga1_00005387-RA	ENSGALP00000006197
gopAga1_00012613-RA	ENSGALP00000037507
gopAga1_00015845-RA	ENSGALP00000009947
gopAga1_00013670-RA	ENSGALP00000010345
gopAga1_00004729-RA	ENSGALP00000025373
gopAga1_00008308-RA	ENSGALP00000029322
gopAga1_00000364-RA	ENSGALP00000032777
gopAga1_00002774-RA	ENSGALP00000027557
gopAga1_00014288-RA	ENSGALP00000012256
gopAga1_00015495-RA	ENSGALP00000027299
gopAga1_00010040-RA	ENSGALP00000030813
gopAga1_00017616-RA	ENSGALP00000042248
gopAga1_00012846-RB	ENSGALP00000022533
gopAga1_00005261-RA	ENSGALP00000010530
gopAga1_00000344-RA	ENSGALP00000012332
gopAga1_00018906-RA	ENSGALP00000011045
gopAga1_00009701-RA	ENSGALP00000042900
gopAga1_00018091-RA	ENSGALP00000007624
gopAga1_00001597-RA	ENSGALP00000037703
gopAga1_00014546-RA	ENSGALP00000023916
gopAga1_00005635-RA	ENSGALP00000038761
gopAga1_00002434-RA	ENSGALP00000026994
gopAga1_00001816-RA	ENSGALP00000042812
gopAga1_00017931-RA	ENSGALP00000005437
gopAga1_00012014-RB	ENSGALP00000036860
gopAga1_00010599-RA	ENSGALP00000017690
gopAga1_00007361-RA	ENSGALP00000000216
gopAga1_00019174-RA	ENSGALP00000003841
gopAga1_00017830-RA	ENSGALP00000025747
gopAga1_00008198-RA	ENSGALP00000005261
gopAga1_00005684-RA	ENSGALP00000017526
gopAga1_00004605-RA	ENSGALP00000017243
gopAga1_00011308-RB	ENSGALP00000005318
gopAga1_00002107-RB	ENSGALP00000010768
gopAga1_00000693-RB	ENSGALP00000021356
gopAga1_00011418-RA	ENSGALP00000022402
gopAga1_00015834-RA	ENSGALP00000006426
gopAga1_00014657-RA	ENSGALP00000017210
gopAga1_00010866-RA	ENSGALP00000037396
gopAga1_00012039-RA	ENSGALP00000009962
gopAga1_00009416-RA	ENSGALP00000019155
gopAga1_00005840-RA	ENSGALP00000000361
gopAga1_00000320-RA	ENSGALP00000004109
gopAga1_00011666-RA	ENSGALP00000020163
gopAga1_00016428-RA	ENSGALP00000024381
gopAga1_00010668-RB	ENSGALP00000024999
gopAga1_00016303-RA	ENSGALP00000015585
gopAga1_00004169-RA	ENSGALP00000011426
gopAga1_00006483-RA	ENSGALP00000023298
gopAga1_00000710-RA	ENSGALP00000025776
gopAga1_00008851-RA	ENSGALP00000014312
gopAga1_00012550-RA	ENSGALP00000006622
gopAga1_00016265-RA	ENSGALP00000021795
gopAga1_00019367-RA	ENSGALP00000036437
gopAga1_00009011-RA	ENSGALP00000038118
gopAga1_00010525-RA	ENSGALP00000003974
gopAga1_00003749-RA	ENSGALP00000010298
gopAga1_00013684-RA	ENSGALP00000030947
gopAga1_00003596-RA	ENSGALP00000025623
gopAga1_00011607-RA	ENSGALP00000018715
gopAga1_00001790-RA	ENSGALP00000005582
gopAga1_00011632-RA	ENSGALP00000013908
gopAga1_00008220-RA	ENSGALP00000003958
gopAga1_00001562-RA	ENSGALP00000004011
gopAga1_00013984-RA	ENSGALP00000040660
gopAga1_00002147-RA	ENSGALP00000022935
gopAga1_00017718-RA	ENSGALP00000026741
gopAga1_00000229-RA	ENSGALP00000005024
gopAga1_00000978-RA	ENSGALP00000037557
gopAga1_00015930-RA	ENSGALP00000039931
gopAga1_00002960-RA	ENSGALP00000019378
gopAga1_00003643-RA	ENSGALP00000041505
gopAga1_00007162-RA	ENSGALP00000013722
gopAga1_00018435-RA	ENSGALP00000002636
gopAga1_00004187-RA	ENSGALP00000022664
gopAga1_00005767-RA	ENSGALP00000013981
gopAga1_00014586-RA	ENSGALP00000019817
gopAga1_00006701-RB	ENSGALP00000038915
gopAga1_00010380-RA	ENSGALP00000041850
gopAga1_00017050-RA	ENSGALP00000005724
gopAga1_00007823-RA	ENSGALP00000023415
gopAga1_00011391-RA	ENSGALP00000008402
gopAga1_00010137-RA	ENSGALP00000006491
gopAga1_00008318-RC	ENSGALP00000014463
gopAga1_00000311-RA	ENSGALP00000003893
gopAga1_00005361-RA	ENSGALP00000040960
gopAga1_00004451-RA	ENSGALP00000025163
gopAga1_00010161-RA	ENSGALP00000009628
gopAga1_00000026-RA	ENSGALP00000019890
gopAga1_00010284-RA	ENSGALP00000010132
gopAga1_00017069-RB	ENSGALP00000017459
gopAga1_00006174-RB	ENSGALP00000022269
gopAga1_00002975-RA	ENSGALP00000012822
gopAga1_00009737-RA	ENSGALP00000035064
gopAga1_00014887-RA	ENSGALP00000013851
gopAga1_00001651-RA	ENSGALP00000028008
gopAga1_00017813-RA	ENSGALP00000025602
gopAga1_00003828-RB	ENSGALP00000017378
gopAga1_00002609-RA	ENSGALP00000001975
gopAga1_00001072-RA	ENSGALP00000015140
gopAga1_00004540-RA	ENSGALP00000003874
gopAga1_00008123-RA	ENSGALP00000008160
gopAga1_00003020-RA	ENSGALP00000020574
gopAga1_00016624-RA	ENSGALP00000025700
gopAga1_00016393-RA	ENSGALP00000018530
gopAga1_00016520-RA	ENSGALP00000030646
gopAga1_00014875-RA	ENSGALP00000008922
gopAga1_00000923-RA	ENSGALP00000015651
gopAga1_00015229-RA	ENSGALP00000024620
gopAga1_00015744-RA	ENSGALP00000024136
gopAga1_00006600-RA	ENSGALP00000037618
gopAga1_00005352-RA	ENSGALP00000020504
gopAga1_00007081-RA	ENSGALP00000016469
gopAga1_00014374-RA	ENSGALP00000038990
gopAga1_00012107-RA	ENSGALP00000016827
gopAga1_00006278-RA	ENSGALP00000042557
gopAga1_00008763-RA	ENSGALP00000017075
gopAga1_00001263-RB	ENSGALP00000023635
gopAga1_00000241-RA	ENSGALP00000009493
gopAga1_00004857-RA	ENSGALP00000022566
gopAga1_00012932-RA	ENSGALP00000030498
gopAga1_00013818-RA	ENSGALP00000031317
gopAga1_00006878-RA	ENSGALP00000040968
gopAga1_00000535-RA	ENSGALP00000001614
gopAga1_00014147-RB	ENSGALP00000017163
gopAga1_00001016-RA	ENSGALP00000031033
gopAga1_00012335-RB	ENSGALP00000014689
gopAga1_00001233-RA	ENSGALP00000039757
gopAga1_00017714-RA	ENSGALP00000012577
gopAga1_00001213-RA	ENSGALP00000011984
gopAga1_00007626-RA	ENSGALP00000041183
gopAga1_00005720-RA	ENSGALP00000036001
gopAga1_00000649-RA	ENSGALP00000010011
gopAga1_00007416-RA	ENSGALP00000013968
gopAga1_00012277-RA	ENSGALP00000025231
gopAga1_00009697-RA	ENSGALP00000007521
gopAga1_00008619-RA	ENSGALP00000024631
gopAga1_00012161-RA	ENSGALP00000008654
gopAga1_00017434-RA	ENSGALP00000016883
gopAga1_00016882-RA	ENSGALP00000029993
gopAga1_00013447-RA	ENSGALP00000043022
gopAga1_00011223-RA	ENSGALP00000008890
gopAga1_00011446-RB	ENSGALP00000012267
gopAga1_00007365-RA	ENSGALP00000021456
gopAga1_00011867-RC	ENSGALP00000042213
gopAga1_00016798-RA	ENSGALP00000024711
gopAga1_00018102-RA	ENSGALP00000003637
gopAga1_00008783-RA	ENSGALP00000012456
gopAga1_00008943-RA	ENSGALP00000000726
gopAga1_00017075-RB	ENSGALP00000043218
gopAga1_00000081-RA	ENSGALP00000012981
gopAga1_00004080-RA	ENSGALP00000008849
gopAga1_00000014-RA	ENSGALP00000020525
gopAga1_00000280-RA	ENSGALP00000005868
gopAga1_00014941-RA	ENSGALP00000028961
gopAga1_00009289-RA	ENSGALP00000016363
gopAga1_00007176-RA	ENSGALP00000008101
gopAga1_00006773-RA	ENSGALP00000009344
gopAga1_00000143-RA	ENSGALP00000003166
gopAga1_00010251-RA	ENSGALP00000027340
gopAga1_00015058-RA	ENSGALP00000008664
gopAga1_00015032-RC	ENSGALP00000022875
gopAga1_00009397-RA	ENSGALP00000009304
gopAga1_00008826-RA	ENSGALP00000007658
gopAga1_00003290-RA	ENSGALP00000005928
gopAga1_00013639-RA	ENSGALP00000026735
gopAga1_00015657-RA	ENSGALP00000002511
gopAga1_00009746-RA	ENSGALP00000042946
gopAga1_00001997-RB	ENSGALP00000000973
gopAga1_00017171-RA	ENSGALP00000002878
gopAga1_00000586-RA	ENSGALP00000013367
gopAga1_00008924-RA	ENSGALP00000016100
gopAga1_00009563-RA	ENSGALP00000000880
gopAga1_00008086-RA	ENSGALP00000007540
gopAga1_00004461-RA	ENSGALP00000009336
gopAga1_00004152-RA	ENSGALP00000036896
gopAga1_00010072-RA	ENSGALP00000002390
gopAga1_00007658-RA	ENSGALP00000037440
gopAga1_00011180-RA	ENSGALP00000004038
gopAga1_00005769-RB	ENSGALP00000013962
gopAga1_00002778-RA	ENSGALP00000021425
gopAga1_00016696-RA	ENSGALP00000010903
gopAga1_00004372-RA	ENSGALP00000027682
gopAga1_00018255-RC	ENSGALP00000002328
gopAga1_00005808-RB	ENSGALP00000022796
gopAga1_00002388-RA	ENSGALP00000036789
gopAga1_00005071-RA	ENSGALP00000022938
gopAga1_00000588-RA	ENSGALP00000013413
gopAga1_00005052-RA	ENSGALP00000001030
gopAga1_00000101-RB	ENSGALP00000022486
gopAga1_00001920-RA	ENSGALP00000033025
gopAga1_00002243-RA	ENSGALP00000013237
gopAga1_00003889-RA	ENSGALP00000018079
gopAga1_00001386-RA	ENSGALP00000023022
gopAga1_00014679-RA	ENSGALP00000025644
gopAga1_00008462-RB	ENSGALP00000025448
gopAga1_00012338-RD	ENSGALP00000038847
gopAga1_00014970-RA	ENSGALP00000005948
gopAga1_00002268-RA	ENSGALP00000038376
gopAga1_00006020-RA	ENSGALP00000040780
gopAga1_00011358-RA	ENSGALP00000002837
gopAga1_00015756-RA	ENSGALP00000014522
gopAga1_00012743-RA	ENSGALP00000026894
gopAga1_00016452-RA	ENSGALP00000013688
gopAga1_00007904-RA	ENSGALP00000025896
gopAga1_00002195-RA	ENSGALP00000009644
gopAga1_00015617-RA	ENSGALP00000041826
gopAga1_00007718-RA	ENSGALP00000012746
gopAga1_00008476-RA	ENSGALP00000016954
gopAga1_00003443-RA	ENSGALP00000006652
gopAga1_00014013-RA	ENSGALP00000022712
gopAga1_00014113-RB	ENSGALP00000039568
gopAga1_00001393-RA	ENSGALP00000017290
gopAga1_00003775-RA	ENSGALP00000042809
gopAga1_00002542-RA	ENSGALP00000036649
gopAga1_00001787-RA	ENSGALP00000041356
gopAga1_00006074-RA	ENSGALP00000000941
gopAga1_00015781-RA	ENSGALP00000042152
gopAga1_00013130-RA	ENSGALP00000008177
gopAga1_00003846-RA	ENSGALP00000017682
gopAga1_00017441-RA	ENSGALP00000021119
gopAga1_00012291-RA	ENSGALP00000031297
gopAga1_00014201-RA	ENSGALP00000020267
gopAga1_00013493-RA	ENSGALP00000040872
gopAga1_00002628-RA	ENSGALP00000016308
gopAga1_00012103-RA	ENSGALP00000008496
gopAga1_00007752-RA	ENSGALP00000000410
gopAga1_00009373-RA	ENSGALP00000022301
gopAga1_00006348-RA	ENSGALP00000011476
gopAga1_00007464-RA	ENSGALP00000015567
gopAga1_00004108-RA	ENSGALP00000003781
gopAga1_00004625-RA	ENSGALP00000023975
gopAga1_00005444-RA	ENSGALP00000037868
gopAga1_00014370-RB	ENSGALP00000041920
gopAga1_00019300-RA	ENSGALP00000027429
gopAga1_00004645-RA	ENSGALP00000040901
gopAga1_00012947-RA	ENSGALP00000009798
gopAga1_00017236-RA	ENSGALP00000028046
gopAga1_00006012-RA	ENSGALP00000002180
gopAga1_00003435-RA	ENSGALP00000006434
gopAga1_00004160-RA	ENSGALP00000009278
gopAga1_00015434-RA	ENSGALP00000026697
gopAga1_00011770-RA	ENSGALP00000010498
gopAga1_00011695-RA	ENSGALP00000000830
gopAga1_00003275-RA	ENSGALP00000033915
gopAga1_00000974-RB	ENSGALP00000014543
gopAga1_00004185-RA	ENSGALP00000015391
gopAga1_00013643-RA	ENSGALP00000017701
gopAga1_00005637-RB	ENSGALP00000024522
gopAga1_00016004-RA	ENSGALP00000027086
gopAga1_00003461-RA	ENSGALP00000022904
gopAga1_00001502-RA	ENSGALP00000043253
gopAga1_00013292-RA	ENSGALP00000040033
gopAga1_00008464-RA	ENSGALP00000025461
gopAga1_00016746-RA	ENSGALP00000011607
gopAga1_00016475-RA	ENSGALP00000026663
gopAga1_00009853-RA	ENSGALP00000039447
gopAga1_00011034-RA	ENSGALP00000013832
gopAga1_00011854-RA	ENSGALP00000043451
gopAga1_00012650-RA	ENSGALP00000000538
gopAga1_00000870-RA	ENSGALP00000015688
gopAga1_00016886-RB	ENSGALP00000005525
gopAga1_00011677-RA	ENSGALP00000038404
gopAga1_00017896-RA	ENSGALP00000001808
gopAga1_00010746-RA	ENSGALP00000002153
gopAga1_00002280-RA	ENSGALP00000009637
gopAga1_00002932-RB	ENSGALP00000007131
gopAga1_00011993-RA	ENSGALP00000009174
gopAga1_00019840-RA	ENSGALP00000035900
gopAga1_00003605-RA	ENSGALP00000024046
gopAga1_00009144-RA	ENSGALP00000038764
gopAga1_00010255-RA	ENSGALP00000000554
gopAga1_00009878-RA	ENSGALP00000023169
gopAga1_00001473-RA	ENSGALP00000023594
gopAga1_00015169-RA	ENSGALP00000022081
gopAga1_00006267-RA	ENSGALP00000006376
gopAga1_00006479-RA	ENSGALP00000023315
gopAga1_00005029-RA	ENSGALP00000007758
gopAga1_00019178-RA	ENSGALP00000041951
gopAga1_00012501-RA	ENSGALP00000017656
gopAga1_00014948-RA	ENSGALP00000016189
gopAga1_00018312-RA	ENSGALP00000012555
gopAga1_00000663-RA	ENSGALP00000009982
gopAga1_00009859-RA	ENSGALP00000005451
gopAga1_00018489-RE	ENSGALP00000024462
gopAga1_00002430-RA	ENSGALP00000015899
gopAga1_00017293-RA	ENSGALP00000000765
gopAga1_00019960-RA	ENSGALP00000013577
gopAga1_00010014-RA	ENSGALP00000041459
gopAga1_00005182-RA	ENSGALP00000006787
gopAga1_00002713-RA	ENSGALP00000013926
gopAga1_00016081-RA	ENSGALP00000008770
gopAga1_00008070-RA	ENSGALP00000019350
gopAga1_00014050-RA	ENSGALP00000018395
gopAga1_00017312-RA	ENSGALP00000025750
gopAga1_00002528-RA	ENSGALP00000019402
gopAga1_00019441-RA	ENSGALP00000002911
gopAga1_00008413-RA	ENSGALP00000029360
gopAga1_00010092-RA	ENSGALP00000017644
gopAga1_00005909-RA	ENSGALP00000022600
gopAga1_00002659-RA	ENSGALP00000041334
gopAga1_00007486-RA	ENSGALP00000041798
gopAga1_00009357-RA	ENSGALP00000029853
gopAga1_00006670-RA	ENSGALP00000030644
gopAga1_00008065-RA	ENSGALP00000042956
gopAga1_00011354-RA	ENSGALP00000012506
gopAga1_00008594-RC	ENSGALP00000004560
gopAga1_00005519-RA	ENSGALP00000035449
gopAga1_00005480-RB	ENSGALP00000003285
gopAga1_00003184-RF	ENSGALP00000019716
gopAga1_00009250-RC	ENSGALP00000031757
gopAga1_00011813-RA	ENSGALP00000033974
gopAga1_00014517-RA	ENSGALP00000041148
gopAga1_00014863-RA	ENSGALP00000022463
gopAga1_00005760-RA	ENSGALP00000041072
gopAga1_00010624-RB	ENSGALP00000006523
gopAga1_00013835-RB	ENSGALP00000018366
gopAga1_00016394-RA	ENSGALP00000015584
gopAga1_00012359-RA	ENSGALP00000020002
gopAga1_00014441-RA	ENSGALP00000041217
gopAga1_00016810-RA	ENSGALP00000030879
gopAga1_00002670-RB	ENSGALP00000041486
gopAga1_00008487-RA	ENSGALP00000016152
gopAga1_00007822-RA	ENSGALP00000039905
gopAga1_00004832-RA	ENSGALP00000008362
gopAga1_00011656-RA	ENSGALP00000018935
gopAga1_00015420-RA	ENSGALP00000043226
gopAga1_00011623-RA	ENSGALP00000042015
gopAga1_00016172-RA	ENSGALP00000027055
gopAga1_00013844-RB	ENSGALP00000019396
gopAga1_00009447-RA	ENSGALP00000024199
gopAga1_00015249-RA	ENSGALP00000015316
gopAga1_00013965-RB	ENSGALP00000014886
gopAga1_00014645-RA	ENSGALP00000009219
gopAga1_00003881-RA	ENSGALP00000021432
gopAga1_00011412-RA	ENSGALP00000022696
gopAga1_00018058-RA	ENSGALP00000039526
gopAga1_00008517-RB	ENSGALP00000009042
gopAga1_00000896-RA	ENSGALP00000022155
gopAga1_00008422-RA	ENSGALP00000018771
gopAga1_00015559-RA	ENSGALP00000039818
gopAga1_00002567-RA	ENSGALP00000023057
gopAga1_00005164-RA	ENSGALP00000002670
gopAga1_00000514-RA	ENSGALP00000002473
gopAga1_00018740-RA	ENSGALP00000006338
gopAga1_00006578-RA	ENSGALP00000022251
gopAga1_00011260-RA	ENSGALP00000020125
gopAga1_00011018-RA	ENSGALP00000024286
gopAga1_00010355-RA	ENSGALP00000024672
gopAga1_00007856-RB	ENSGALP00000011778
gopAga1_00014409-RA	ENSGALP00000011074
gopAga1_00007853-RA	ENSGALP00000041890
gopAga1_00009887-RA	ENSGALP00000018888
gopAga1_00011805-RB	ENSGALP00000023119
gopAga1_00013715-RA	ENSGALP00000038731
gopAga1_00001631-RA	ENSGALP00000038056
gopAga1_00014621-RA	ENSGALP00000032493
gopAga1_00008863-RA	ENSGALP00000010354
gopAga1_00005935-RA	ENSGALP00000026522
gopAga1_00011615-RA	ENSGALP00000011428
gopAga1_00014866-RA	ENSGALP00000004679
gopAga1_00008964-RA	ENSGALP00000025553
gopAga1_00013893-RA	ENSGALP00000003700
gopAga1_00013775-RA	ENSGALP00000002114
gopAga1_00004827-RB	ENSGALP00000008433
gopAga1_00017507-RA	ENSGALP00000010967
gopAga1_00015771-RC	ENSGALP00000019843
gopAga1_00011122-RA	ENSGALP00000040890
gopAga1_00018600-RA	ENSGALP00000041036
gopAga1_00004264-RA	ENSGALP00000041998
gopAga1_00013394-RA	ENSGALP00000039371
gopAga1_00004376-RA	ENSGALP00000027678
gopAga1_00006977-RA	ENSGALP00000014847
gopAga1_00006332-RB	ENSGALP00000003458
gopAga1_00010924-RA	ENSGALP00000020464
gopAga1_00003777-RA	ENSGALP00000038984
gopAga1_00012881-RB	ENSGALP00000001581
gopAga1_00016657-RA	ENSGALP00000013213
gopAga1_00013851-RA	ENSGALP00000009075
gopAga1_00003935-RA	ENSGALP00000011703
gopAga1_00014680-RA	ENSGALP00000011564
gopAga1_00003139-RA	ENSGALP00000039712
gopAga1_00004901-RA	ENSGALP00000026544
gopAga1_00015081-RA	ENSGALP00000030061
gopAga1_00005490-RA	ENSGALP00000027280
gopAga1_00010338-RB	ENSGALP00000043053
gopAga1_00018481-RA	ENSGALP00000042253
gopAga1_00007238-RA	ENSGALP00000027039
gopAga1_00002732-RB	ENSGALP00000018045
gopAga1_00010095-RA	ENSGALP00000020170
gopAga1_00016628-RA	ENSGALP00000030365
gopAga1_00007006-RA	ENSGALP00000007421
gopAga1_00011081-RA	ENSGALP00000012112
gopAga1_00006118-RA	ENSGALP00000001296
gopAga1_00003659-RA	ENSGALP00000040979
gopAga1_00006534-RA	ENSGALP00000024373
gopAga1_00008698-RA	ENSGALP00000025825
gopAga1_00006110-RA	ENSGALP00000001392
gopAga1_00014769-RA	ENSGALP00000029430
gopAga1_00015999-RA	ENSGALP00000007355
gopAga1_00009601-RA	ENSGALP00000042409
gopAga1_00001387-RA	ENSGALP00000023016
gopAga1_00005186-RA	ENSGALP00000017867
gopAga1_00015715-RA	ENSGALP00000037545
gopAga1_00004991-RA	ENSGALP00000016556
gopAga1_00011549-RA	ENSGALP00000011142
gopAga1_00017753-RA	ENSGALP00000040961
gopAga1_00017201-RB	ENSGALP00000010211
gopAga1_00012055-RA	ENSGALP00000009309
gopAga1_00000539-RA	ENSGALP00000020157
gopAga1_00009269-RA	ENSGALP00000014836
gopAga1_00003218-RA	ENSGALP00000000266
gopAga1_00003391-RA	ENSGALP00000013527
gopAga1_00013897-RA	ENSGALP00000009229
gopAga1_00013830-RA	ENSGALP00000025099
gopAga1_00016921-RA	ENSGALP00000013574
gopAga1_00000199-RA	ENSGALP00000026277
gopAga1_00001413-RA	ENSGALP00000002091
gopAga1_00011468-RA	ENSGALP00000025528
gopAga1_00008489-RA	ENSGALP00000023510
gopAga1_00006016-RA	ENSGALP00000015433
gopAga1_00006398-RA	ENSGALP00000032014
gopAga1_00005332-RA	ENSGALP00000007647
gopAga1_00000731-RA	ENSGALP00000017141
gopAga1_00019328-RA	ENSGALP00000035906
gopAga1_00006426-RA	ENSGALP00000008817
gopAga1_00006315-RA	ENSGALP00000016204
gopAga1_00006643-RB	ENSGALP00000040409
gopAga1_00009136-RA	ENSGALP00000025682
gopAga1_00004216-RA	ENSGALP00000003409
gopAga1_00011627-RB	ENSGALP00000036932
gopAga1_00003968-RA	ENSGALP00000013524
gopAga1_00011700-RA	ENSGALP00000036494
gopAga1_00011394-RA	ENSGALP00000013956
gopAga1_00004742-RA	ENSGALP00000010737
gopAga1_00000477-RA	ENSGALP00000004621
gopAga1_00001960-RA	ENSGALP00000028353
gopAga1_00009649-RA	ENSGALP00000009863
gopAga1_00001882-RA	ENSGALP00000041744
gopAga1_00012429-RA	ENSGALP00000004319
gopAga1_00012897-RA	ENSGALP00000000518
gopAga1_00019326-RA	ENSGALP00000026662
gopAga1_00007789-RA	ENSGALP00000003104
gopAga1_00000060-RA	ENSGALP00000017888
gopAga1_00008536-RA	ENSGALP00000017600
gopAga1_00005140-RB	ENSGALP00000000734
gopAga1_00015780-RA	ENSGALP00000013171
gopAga1_00004499-RA	ENSGALP00000005756
gopAga1_00011097-RA	ENSGALP00000039014
gopAga1_00017690-RB	ENSGALP00000023101
gopAga1_00000485-RB	ENSGALP00000004162
gopAga1_00006838-RA	ENSGALP00000010935
gopAga1_00001250-RA	ENSGALP00000002409
gopAga1_00001968-RA	ENSGALP00000039206
gopAga1_00018993-RA	ENSGALP00000039319
gopAga1_00010438-RB	ENSGALP00000008267
gopAga1_00007903-RA	ENSGALP00000016623
gopAga1_00008204-RA	ENSGALP00000001949
gopAga1_00005068-RA	ENSGALP00000006932
gopAga1_00003316-RB	ENSGALP00000001239
gopAga1_00005345-RA	ENSGALP00000042743
gopAga1_00011647-RA	ENSGALP00000005441
gopAga1_00004722-RA	ENSGALP00000027482
gopAga1_00012092-RC	ENSGALP00000019566
gopAga1_00009571-RC	ENSGALP00000023454
gopAga1_00012505-RA	ENSGALP00000001323
gopAga1_00006224-RA	ENSGALP00000006213
gopAga1_00013927-RA	ENSGALP00000032274
gopAga1_00002813-RB	ENSGALP00000009432
gopAga1_00001875-RA	ENSGALP00000043064
gopAga1_00017074-RA	ENSGALP00000010348
gopAga1_00019698-RA	ENSGALP00000041622
gopAga1_00002360-RA	ENSGALP00000006474
gopAga1_00009904-RA	ENSGALP00000010969
gopAga1_00003066-RA	ENSGALP00000003530
gopAga1_00000309-RA	ENSGALP00000003755
gopAga1_00004683-RA	ENSGALP00000020307
gopAga1_00017644-RA	ENSGALP00000011138
gopAga1_00014847-RB	ENSGALP00000012815
gopAga1_00011228-RA	ENSGALP00000013106
gopAga1_00004268-RA	ENSGALP00000039924
gopAga1_00015690-RA	ENSGALP00000024389
gopAga1_00003188-RA	ENSGALP00000019701
gopAga1_00012269-RA	ENSGALP00000042729
gopAga1_00013400-RA	ENSGALP00000002660
gopAga1_00005142-RA	ENSGALP00000042291
gopAga1_00009716-RA	ENSGALP00000042159
gopAga1_00019511-RA	ENSGALP00000001136
gopAga1_00016909-RA	ENSGALP00000009313
gopAga1_00006745-RA	ENSGALP00000019435
gopAga1_00017506-RA	ENSGALP00000026172
gopAga1_00009582-RB	ENSGALP00000027512
gopAga1_00015795-RA	ENSGALP00000006257
gopAga1_00017589-RA	ENSGALP00000034254
gopAga1_00015048-RA	ENSGALP00000023707
gopAga1_00013172-RA	ENSGALP00000007024
gopAga1_00003180-RA	ENSGALP00000019757
gopAga1_00002335-RA	ENSGALP00000013359
gopAga1_00017380-RA	ENSGALP00000024029
gopAga1_00001323-RA	ENSGALP00000003806
gopAga1_00014647-RA	ENSGALP00000016735
gopAga1_00002751-RA	ENSGALP00000010244
gopAga1_00004148-RA	ENSGALP00000026064
gopAga1_00009026-RA	ENSGALP00000003802
gopAga1_00005845-RA	ENSGALP00000025438
[truncated: 9,491 more rows]
