# Supplementary material for: The Agassiz’s desert tortoise genome provides a resource for the conservation of a threatened species
Source: PLoS One. 2017 May 31;12(5):e0177708. doi: 10.1371/journal.pone.0177708 (PMC5451010; doi:10.1371/journal.pone.0177708)
Supplement: S6 Dataset — (CSV) [file pone.0177708.s020.csv]

Aligatorv3.NCBI.protein.fa Anolis_carolinensis.AnoCar2.0.pep.all.fa Chrysemys_picta_bellii.3.0.3.NCBI.protein.fa Gallus_gallus.Galgal4.pep.all.fa Homo_sapiens.GRCh38.pep.all.fa Pelodiscus_sinensis.PelSin_1.0.pep.all.fa GopAga1.0.proteins.fa
OG0000000 XP_006259161.1	XP_014449288.1	XP_006270961.1	XP_014459755.1	XP_014460363.1	XP_014461441.1	XP_006267554.1	XP_006267553.1	XP_014462538.1	XP_006267549.1	XP_006267552.1	XP_006267551.2	XP_006272907.2	XP_006278166.1	XP_006277195.1	XP_014460797.1	XP_006264736.1	XP_006264737.1	XP_006264738.2	XP_006264739.1	XP_006277245.2	XP_006278573.1	XP_006278575.1	XP_006278576.1	XP_006278578.1	XP_006275510.2	XP_006277369.1	XP_006268910.1	XP_006268911.1	XP_006268914.1	XP_006268913.1	XP_006274740.1	XP_006275313.1	XP_014453239.1	XP_006268856.2	XP_006260086.2	XP_006270519.1	XP_006262166.1	XP_006270517.1	XP_006268378.1	XP_006268379.1	XP_006268373.1	XP_006268376.1	XP_006268369.1	XP_006268370.1	XP_006268367.1	XP_006268368.2	XP_006268380.2	XP_006268381.1	XP_006276973.2
OG0000001 XP_006269378.2	XP_014453245.1	XP_014453243.1	XP_014463418.1	XP_014454390.1	XP_014461087.1	XP_014457013.1	XP_014452459.1	XP_014459514.1	XP_014453207.1	XP_014454097.1	XP_014454095.1	XP_014453416.1	XP_014456250.1	XP_014460726.1	XP_014452135.1	XP_014465993.1	XP_014462530.1	XP_014452457.1	XP_014452456.1	XP_014451190.1	XP_014451191.1	XP_014453250.1	XP_014454098.1	XP_014461086.1	XP_014461169.1	XP_014457237.1	XP_014457236.1	XP_014450034.1	XP_014461101.1	XP_014463479.1	XP_014452190.1	XP_014452189.1	XP_014453883.1	XP_014461171.1	XP_014451109.1	XP_014459859.1	XP_014459858.1	XP_014459860.1	XP_014461088.1	XP_014461089.1	XP_014461090.1	XP_014461091.1	XP_014452009.1	XP_014452109.1	XP_014460023.1	XP_014456029.1	XP_014453186.1	XP_014465531.1	XP_014452186.1
OG0000002 ENSACAP00000022111.1	ENSACAP00000023168.1	ENSACAP00000022110.1	ENSACAP00000018767.1	ENSACAP00000021156.1	ENSACAP00000023362.1	ENSACAP00000019232.1	ENSACAP00000021815.1	ENSACAP00000019714.1	ENSACAP00000022496.1	ENSACAP00000022048.1	ENSACAP00000022742.1	ENSACAP00000020400.1	ENSACAP00000019699.1	ENSACAP00000018410.1	ENSACAP00000021882.1	ENSACAP00000021763.1	ENSACAP00000020197.1	ENSACAP00000022779.1	ENSACAP00000018341.1	ENSACAP00000022338.1	ENSACAP00000023439.1	ENSACAP00000023336.1	ENSACAP00000021888.1	ENSACAP00000022432.1	ENSACAP00000019755.1	ENSACAP00000022919.1	ENSACAP00000022835.1	ENSACAP00000022008.1	ENSACAP00000018896.1	ENSACAP00000020723.1	ENSACAP00000022302.1	ENSACAP00000022642.1	ENSACAP00000018993.1	ENSACAP00000022785.1	ENSACAP00000021387.1	ENSACAP00000023106.1	ENSACAP00000023024.1	ENSACAP00000022976.1	ENSACAP00000018086.1	ENSACAP00000022292.1	ENSACAP00000022308.1	ENSACAP00000021029.1	ENSACAP00000023325.1	ENSACAP00000021773.1	ENSACAP00000020415.1	ENSACAP00000022174.1	ENSACAP00000021726.1	ENSACAP00000023194.1	ENSACAP00000022601.1
OG0000003 XP_014461656.1	XP_014462433.1	XP_014456719.1	XP_014459700.1 ENSACAP00000014188.2 XP_008162027.1	XP_005313346.1	XP_005313347.1	XP_008174701.1	XP_008174700.1	XP_008174707.1	XP_005312687.1	XP_008173699.1	XP_005315095.1	XP_008175274.1	XP_005315096.1	XP_008175271.1	XP_008175270.1	XP_008175273.1	XP_008175272.1	XP_005315614.1	XP_005313453.1	XP_005313452.1	XP_008176473.1	XP_005285701.2	XP_008173689.1	XP_008174506.1	XP_005313003.1	XP_008175498.1	XP_008175499.1	XP_008175490.1	XP_005314135.1	XP_008175269.1	XP_005313702.1	XP_005313703.1	XP_008175753.1	XP_008175754.1	XP_008175444.1	XP_008176253.1	XP_005311332.1	XP_008173727.1	XP_008174977.1	XP_008173612.1	XP_008175502.1	XP_008175501.1	XP_008175500.1	XP_008174509.1	XP_005313313.1	XP_005313312.1	XP_008174438.1	XP_008175439.1	XP_008174998.1
OG0000004 XP_006278122.2	XP_006264210.2	XP_014456287.1	XP_006274259.2	XP_014462780.1	XP_006260011.1	XP_006260010.2	XP_006261205.2	XP_006264209.1	XP_006273196.2	XP_006273195.2	XP_006271530.2	XP_006259154.1	XP_006259153.1	XP_014460829.1	XP_006259155.2	XP_014463610.1	XP_006271529.2	XP_006259606.1	XP_006259605.2	XP_006259604.1	XP_014461264.1	XP_006273194.2	XP_014460831.1	XP_006263057.2	XP_006263056.2	XP_006263055.2	XP_006263054.2	XP_014463183.1	XP_014455668.1	XP_006262497.2	XP_006270903.2	XP_006274260.2	XP_006271531.2	XP_006263759.2	XP_006263487.1	XP_006259152.2	XP_006273382.2	XP_006259597.2	XP_006258091.2	XP_006258092.1	XP_006258093.1 ENSACAP00000006724.2 XP_005311496.1	XP_005311497.1	XP_005311493.1	XP_005311494.1	XP_005311491.1	XP_005311492.2	XP_005311489.1	XP_005311490.1	XP_005290063.1
OG0000005 ENSP00000479640.1	ENSP00000480300.1	ENSP00000482565.1	ENSP00000480458.1	ENSP00000480204.1	ENSP00000483284.1	ENSP00000379580.3	ENSP00000478128.1	ENSP00000479351.1	ENSP00000375628.1	ENSP00000319960.5	ENSP00000483218.1	ENSP00000478100.1	ENSP00000483958.1	ENSP00000479666.1	ENSP00000482843.1	ENSP00000480386.1	ENSP00000483224.1	ENSP00000479993.1	ENSP00000270452.3	ENSP00000375616.1	ENSP00000375614.3	ENSP00000408995.2	ENSP00000401962.1	ENSP00000375613.3	ENSP00000325525.3	ENSP00000270442.5	ENSP00000481019.1	ENSP00000481872.1	ENSP00000484469.1	ENSP00000478126.1	ENSP00000482694.1	ENSP00000483171.1	ENSP00000478476.1	ENSP00000484809.1	ENSP00000480225.1	ENSP00000484515.1	ENSP00000481772.1	ENSP00000483846.1	ENSP00000484756.1	ENSP00000477834.1	ENSP00000484336.1	ENSP00000320390.5	ENSP00000263430.8	ENSP00000482904.1	ENSP00000478048.1	ENSP00000478666.1	ENSP00000484782.1	ENSP00000484194.1	ENSP00000477505.1
OG0000006 XP_006260396.1	XP_014453367.1	XP_014450778.1	XP_014456659.1	XP_014449225.1	XP_014463082.1	XP_014463087.1	XP_014449061.1	XP_014454373.1	XP_006266967.2	XP_014451042.1	XP_014466846.1 ENSACAP00000022948.1	ENSACAP00000022164.1	ENSACAP00000022155.1	ENSACAP00000019238.2	ENSACAP00000021503.1	ENSACAP00000010869.3	ENSACAP00000002239.3	ENSACAP00000021715.1	ENSACAP00000022073.1	ENSACAP00000022045.1	ENSACAP00000023159.1	ENSACAP00000022734.1	ENSACAP00000002243.2	ENSACAP00000020840.1	ENSACAP00000020629.1	ENSACAP00000002684.2	ENSACAP00000018425.1	ENSACAP00000020724.2	ENSACAP00000018054.1	ENSACAP00000023424.1	ENSACAP00000021180.1	ENSACAP00000022950.1	ENSACAP00000019657.1	ENSACAP00000010873.2	ENSACAP00000002686.2	ENSACAP00000021453.2	ENSACAP00000020908.1	ENSACAP00000023295.1	ENSACAP00000020435.1	ENSACAP00000019181.1	ENSACAP00000002688.3	ENSACAP00000019770.2	ENSACAP00000022326.1 XP_005314324.2	XP_005314329.1	XP_008175844.1	XP_005314256.1	XP_008176307.1	XP_008176417.1	XP_005314257.1
OG0000007 XP_006260568.2	XP_014453046.1	XP_014449960.1	XP_014461627.1	XP_014453709.1	XP_006265823.1	XP_014453711.1	XP_014453710.1	XP_014460174.1	XP_014455453.1	XP_014455454.1	XP_014455455.1	XP_006273203.1	XP_014455456.1	XP_014455457.1	XP_014455365.1	XP_014455366.1	XP_014455367.1	XP_014459961.1	XP_006260337.2	XP_006270092.1	XP_006270091.1	XP_014456666.1	XP_014453033.1	XP_014453705.1	XP_014455475.1	XP_014456094.1	XP_014456095.1	XP_014455473.1	XP_006270490.1	XP_014455369.1	XP_014455368.1	XP_014455370.1	XP_014455420.1	XP_014449959.1	XP_006261585.2	XP_014455417.1	XP_014453706.1	XP_014453704.1	XP_014453708.1	XP_006261589.2	XP_014455419.1	XP_014455418.1	XP_014455421.1	XP_006261587.2	XP_014461733.1	XP_006260906.1	XP_006260903.1	XP_014459974.1	XP_006277168.2 ENSACAP00000000529.2
OG0000008 XP_014460768.1	XP_014452341.1	XP_014452340.1	XP_014460767.1 ENSACAP00000022387.1	ENSACAP00000002755.3	ENSACAP00000002747.2	ENSACAP00000017905.2	ENSACAP00000020429.1	ENSACAP00000017847.2	ENSACAP00000018293.1	ENSACAP00000002795.3	ENSACAP00000017946.2	ENSACAP00000002720.2	ENSACAP00000021891.1	ENSACAP00000002800.2	ENSACAP00000022956.1	ENSACAP00000022483.1	ENSACAP00000002868.2	ENSACAP00000002864.2	ENSACAP00000023384.1	ENSACAP00000002869.3	ENSACAP00000019364.1	ENSACAP00000019533.1	ENSACAP00000023255.1	ENSACAP00000002722.2	ENSACAP00000022093.1	ENSACAP00000018242.1	ENSACAP00000017974.1	ENSACAP00000019374.1	ENSACAP00000021610.1	ENSACAP00000020557.1	ENSACAP00000002719.3	ENSACAP00000002736.3	ENSACAP00000022727.1	ENSACAP00000023265.1	ENSACAP00000022078.1	ENSACAP00000002791.2	ENSACAP00000017895.2	ENSACAP00000000211.3	ENSACAP00000022698.1	ENSACAP00000021765.1	ENSACAP00000021823.1	ENSACAP00000002266.2	ENSACAP00000005081.2	ENSACAP00000017826.2	ENSACAP00000000208.2	ENSACAP00000002733.3 XP_008176460.1	XP_008175706.1	XP_008176373.1	XP_008176275.1
OG0000009 XP_014451205.1	XP_014461646.1	XP_014460030.1	XP_014453300.1 ENSACAP00000018192.1	ENSACAP00000001975.2	ENSACAP00000019398.1	ENSACAP00000020604.1	ENSACAP00000019998.1	ENSACAP00000018359.1	ENSACAP00000018710.1	ENSACAP00000006094.2	ENSACAP00000019894.1	ENSACAP00000018208.1	ENSACAP00000020051.1	ENSACAP00000021441.1	ENSACAP00000017525.2 XP_008176463.1	XP_008165661.1	XP_008170016.1	XP_008164294.1	XP_005293549.1	XP_008162606.1	XP_008166594.1	XP_008171150.1	XP_008168787.1	XP_008162597.1	XP_008177466.1	XP_008162598.1	XP_008164490.1 ENSP00000406723.3	ENSP00000428831.1	ENSP00000386184.3	ENSP00000349708.4	ENSP00000386191.2	ENSP00000411372.1	ENSP00000395259.2	ENSP00000415939.2	ENSP00000433093.1	ENSP00000398106.2	ENSP00000435663.1	ENSP00000435491.1	ENSP00000406027.1	ENSP00000420877.1	ENSP00000432764.1	ENSP00000393017.2	ENSP00000480524.1	ENSP00000483930.1 ENSPSIP00000015591.1	ENSPSIP00000015605.1	ENSPSIP00000016447.1	ENSPSIP00000006714.1	ENSPSIP00000018051.1	ENSPSIP00000009271.1
OG0000010 XP_014456279.1	XP_014453355.1	XP_014463457.1 ENSACAP00000019917.1	ENSACAP00000020654.2 XP_008176076.1	XP_005315137.1	XP_005315422.1	XP_005315577.1	XP_008176155.1 ENSP00000448363.1	ENSP00000389969.2	ENSP00000433426.1	ENSP00000447614.1	ENSP00000399168.2	ENSP00000372979.3	ENSP00000372975.4	ENSP00000403541.2	ENSP00000431141.1	ENSP00000383195.3	ENSP00000436842.1	ENSP00000411867.1	ENSP00000406366.1	ENSP00000398188.2	ENSP00000405190.1	ENSP00000373123.4	ENSP00000351977.3	ENSP00000398913.1	ENSP00000394889.1	ENSP00000450300.1	ENSP00000435817.1	ENSP00000405178.2	ENSP00000416672.1	ENSP00000448085.1	ENSP00000403471.1	ENSP00000433409.1	ENSP00000405931.1	ENSP00000397420.2	ENSP00000409132.1	ENSP00000408773.2	ENSP00000397733.2	ENSP00000447780.1	ENSP00000390851.2	ENSP00000413189.2	ENSP00000415025.2	ENSP00000407431.2	ENSP00000433088.1	ENSP00000400458.2	ENSP00000484270.1	ENSP00000412426.1	ENSP00000415401.1	ENSP00000399835.1	ENSP00000447635.1
OG0000011 XP_014459767.1	XP_014459768.1	XP_014456136.1	XP_014460711.1	XP_014460712.1	XP_014460715.1	XP_006273479.2	XP_014464060.1	XP_014459054.1	XP_014460832.1 ENSACAP00000012482.2	ENSACAP00000015346.3	ENSACAP00000018695.1	ENSACAP00000019623.1	ENSACAP00000018863.1	ENSACAP00000015344.2	ENSACAP00000023076.1	ENSACAP00000019408.1	ENSACAP00000018796.1	ENSACAP00000020544.1	ENSACAP00000021338.1	ENSACAP00000018303.1	ENSACAP00000018209.1	ENSACAP00000019255.1	ENSACAP00000021474.1	ENSACAP00000019820.1	ENSACAP00000021526.1	ENSACAP00000020472.1	ENSACAP00000020942.1	ENSACAP00000020926.1	ENSACAP00000018480.1	ENSACAP00000021195.1	ENSACAP00000012224.2	ENSACAP00000012193.2	ENSACAP00000020421.1	ENSACAP00000002796.2	ENSACAP00000019677.1	ENSACAP00000018200.1	ENSACAP00000020106.1	ENSACAP00000018123.1	ENSACAP00000020333.1	ENSACAP00000020976.1	ENSACAP00000012180.2	ENSACAP00000018668.1	ENSACAP00000020177.1	ENSACAP00000019377.1	ENSACAP00000018280.1	ENSACAP00000019020.1	ENSACAP00000018313.1	ENSACAP00000018650.1	ENSACAP00000019971.1
OG0000012 XP_014461769.1	XP_014458751.1	XP_006260917.2	XP_014454776.1	XP_014458743.1	XP_014459042.1	XP_014459040.1	XP_014459041.1	XP_014453110.1 ENSACAP00000006257.2 XP_005315502.1	XP_005315061.1	XP_005315523.1	XP_005315598.1	XP_008172273.1	XP_005315099.1	XP_005315472.1	XP_005315552.1	XP_005315201.2	XP_008176474.1	XP_005315381.1 ENSGALP00000040418.2	ENSGALP00000000193.3	ENSGALP00000008911.4 ENSP00000388249.2	ENSP00000399298.2	ENSP00000389618.1	ENSP00000399852.1	ENSP00000409322.2	ENSP00000410107.2	ENSP00000393651.1	ENSP00000482266.1	ENSP00000481636.1	ENSP00000449692.2	ENSP00000396330.2	ENSP00000410512.2	ENSP00000390431.1	ENSP00000396095.2	ENSP00000447061.2	ENSP00000484527.1	ENSP00000382378.2	ENSP00000392280.1	ENSP00000484489.1	ENSP00000391708.1	ENSP00000410046.2	ENSP00000478963.1	ENSP00000477914.1	ENSP00000406128.1	ENSP00000394783.2	ENSP00000437213.1	ENSP00000385037.2	ENSP00000408879.1	ENSP00000431178.1	ENSP00000395780.2
OG0000013 XP_006261988.1 ENSGALP00000042999.1	ENSGALP00000041344.1	ENSGALP00000022681.4	ENSGALP00000041811.1	ENSGALP00000042508.1	ENSGALP00000041171.1	ENSGALP00000041752.1	ENSGALP00000018219.4	ENSGALP00000042826.1	ENSGALP00000028195.3	ENSGALP00000035413.2	ENSGALP00000010280.4	ENSGALP00000034733.2	ENSGALP00000034928.2	ENSGALP00000042592.1	ENSGALP00000040669.1	ENSGALP00000041064.1	ENSGALP00000028650.3	ENSGALP00000042019.1	ENSGALP00000028337.4	ENSGALP00000042584.1	ENSGALP00000034922.2	ENSGALP00000028522.3	ENSGALP00000042927.1	ENSGALP00000028903.3	ENSGALP00000041580.1	ENSGALP00000034807.2	ENSGALP00000043378.1	ENSGALP00000029285.3	ENSGALP00000042991.1	ENSGALP00000043027.1	ENSGALP00000040913.1	ENSGALP00000042754.1	ENSGALP00000041019.1	ENSGALP00000041060.1	ENSGALP00000041674.1	ENSGALP00000043359.1	ENSGALP00000000077.4	ENSGALP00000043382.1	ENSGALP00000041484.1	ENSGALP00000042652.1	ENSGALP00000043456.1	ENSGALP00000021840.4	ENSGALP00000043036.1	ENSGALP00000041457.1	ENSGALP00000035255.2	ENSGALP00000034756.2	ENSGALP00000022606.4	ENSGALP00000041677.1	ENSGALP00000041321.1
OG0000014 XP_014459637.1	XP_014459635.1	XP_014459634.1	XP_014459625.1	XP_014459636.1	XP_006272509.1	XP_006266412.2	XP_014452464.1 ENSACAP00000019640.1	ENSACAP00000018162.2	ENSACAP00000016689.3 XP_005313074.1	XP_005313075.1	XP_008174677.1	XP_008174676.1	XP_008174675.1	XP_008174674.1	XP_005312240.1	XP_008175375.1	XP_008175376.1	XP_005314641.1	XP_008174459.1	XP_005312401.2	XP_005315508.1	XP_005313497.1	XP_008174457.1	XP_005315056.1	XP_005315055.2	XP_005315253.1	XP_008175910.1	XP_008175681.1	XP_008175683.1	XP_008175682.1	XP_008176310.1	XP_008176480.1	XP_008176484.1	XP_008175339.1	XP_008175337.1	XP_005315100.2	XP_008176081.1	XP_008176083.1	XP_008174332.1	XP_005312678.2	XP_008176322.1	XP_005313529.1	XP_008174449.1	XP_008175053.1	XP_008175055.1	XP_008175057.1	XP_008174460.1	XP_008175059.1	XP_008176174.1
OG0000015 XP_014464408.1	XP_006263579.1	XP_006263580.2	XP_006263578.2	XP_014456400.1	XP_014454371.1	XP_014452685.1	XP_014449192.1	XP_006275915.2	XP_014450700.1	XP_014462558.1	XP_014462559.1	XP_014465807.1	XP_014465806.1	XP_014463248.1	XP_006267706.1	XP_006263305.1	XP_006263304.1	XP_006269383.1	XP_014460472.1	XP_014460240.1	XP_014455179.1	XP_014463646.1	XP_014452345.1	XP_006258410.2	XP_014451804.1	XP_014456483.1	XP_006265738.2	XP_006265737.1	XP_006276464.1	XP_014462900.1	XP_006277193.2	XP_014452476.1	XP_014460384.1	XP_006271546.1	XP_014453176.1	XP_014455115.1 ENSACAP00000018546.1	ENSACAP00000021280.2	ENSACAP00000020597.1	ENSACAP00000010720.2	ENSACAP00000010710.2	ENSACAP00000018211.1	ENSACAP00000010711.2	ENSACAP00000021003.1	ENSACAP00000010707.2	ENSACAP00000019487.1	ENSACAP00000010699.2	ENSACAP00000019158.1 XP_008175538.1	XP_008175539.1	XP_008174185.1
OG0000016 XP_014460007.1	XP_014460010.1	XP_014463746.1	XP_014460008.1	XP_014460009.1	XP_006274420.1	XP_014455490.1	XP_014455489.1	XP_014463747.1 ENSACAP00000020524.1	ENSACAP00000011837.2	ENSACAP00000016961.2	ENSACAP00000011455.2	ENSACAP00000023079.1	ENSACAP00000011482.2	ENSACAP00000023408.1	ENSACAP00000013671.2	ENSACAP00000011822.3	ENSACAP00000021797.1	ENSACAP00000013684.2 XP_005311366.1	XP_008173605.1	XP_008175062.1	XP_005312295.1	XP_005312296.1	XP_005312580.1	XP_005312581.1	XP_005312577.1	XP_005312579.1	XP_005312588.1	XP_005312298.2	XP_005313137.1	XP_005312726.1	XP_008176204.1	XP_005312724.1	XP_005312725.1	XP_005313135.1	XP_005313136.1	XP_005313119.2	XP_005313120.1	XP_005313695.2	XP_008174764.1	XP_008174761.1	XP_005311353.1	XP_005311354.1	XP_005311355.1	XP_005311357.1	XP_005313699.1	XP_008175487.1	XP_005311352.1	XP_005315059.1	XP_005312621.1
OG0000017 XP_014462802.1	XP_014459963.1	XP_014460358.1	XP_014460359.1	XP_014460360.1	XP_014460361.1	XP_014460362.1	XP_014461691.1	XP_014466453.1	XP_014461697.1	XP_014450699.1	XP_014450059.1	XP_014450061.1	XP_014450063.1	XP_014450065.1	XP_014461572.1	XP_014450060.1	XP_014453017.1	XP_014455485.1	XP_014461705.1	XP_014453020.1	XP_014450062.1	XP_014461712.1 ENSACAP00000011377.2 XP_005313324.1	XP_005314215.1	XP_008173888.1	XP_008173889.1	XP_008173884.1	XP_008173885.1	XP_008173886.1	XP_008173887.1	XP_005311634.1	XP_005311636.2	XP_005315039.1	XP_005313760.1	XP_008175387.1	XP_005313344.2	XP_008175588.1	XP_005311635.1	XP_008173890.1	XP_008175673.1	XP_008175292.1	XP_008175823.1	XP_005314411.1	XP_008171864.1	XP_008175291.1	XP_005314896.1	XP_005314898.1	XP_005314906.1	XP_008173902.1	XP_008176052.1
OG0000018 XP_014452836.1 ENSACAP00000012170.3 XP_008173827.1 ENSP00000477867.1	ENSP00000399312.1	ENSP00000393877.1	ENSP00000396036.1	ENSP00000397639.1	ENSP00000393367.1	ENSP00000407212.1	ENSP00000400275.1	ENSP00000397008.1	ENSP00000400353.1	ENSP00000394342.1	ENSP00000403652.2	ENSP00000408125.1	ENSP00000404578.1	ENSP00000413698.2	ENSP00000412110.1	ENSP00000397894.2	ENSP00000410156.2	ENSP00000449636.2	ENSP00000389121.1	ENSP00000390966.2	ENSP00000409057.1	ENSP00000398389.1	ENSP00000408554.1	ENSP00000403275.1	ENSP00000415330.1	ENSP00000413551.1	ENSP00000416540.2	ENSP00000409196.1	ENSP00000394240.1	ENSP00000403436.1	ENSP00000414815.1	ENSP00000405607.1	ENSP00000394111.1	ENSP00000400641.1	ENSP00000406240.1	ENSP00000407297.1	ENSP00000401218.1	ENSP00000414702.1	ENSP00000404703.1	ENSP00000416326.1	ENSP00000406111.1	ENSP00000403292.1	ENSP00000406766.1	ENSP00000402429.1	ENSP00000390185.1	ENSP00000400968.1	ENSP00000406589.1	ENSP00000449634.2	ENSP00000478966.1
OG0000019 XP_006278572.1	XP_006260878.2	XP_006277209.1	XP_014465469.1	XP_014465468.1	XP_014465471.1	XP_014465470.1	XP_006278558.1	XP_006259629.1	XP_014456481.1	XP_014457517.1	XP_006259157.1	XP_006278560.1	XP_014451236.1	XP_006278561.1	XP_006278564.2	XP_006278571.1	XP_006278569.1	XP_014465467.1	XP_014465460.1	XP_006260889.2	XP_014461128.1	XP_006269126.1	XP_006278562.1	XP_006260890.1	XP_006263094.2	XP_014449977.1	XP_014449971.1	XP_006258080.1	XP_006278565.1	XP_006268705.1	XP_006277400.2	XP_006277401.1	XP_006265612.1 ENSACAP00000021664.1	ENSACAP00000008515.2	ENSACAP00000008496.2	ENSACAP00000008511.2	ENSACAP00000018708.1	ENSACAP00000018969.1	ENSACAP00000010688.2	ENSACAP00000002735.2 XP_005280618.1	XP_008172625.1	XP_008172618.1	XP_005311959.1	XP_005284287.1	XP_005284288.1	XP_008176336.1	XP_005310498.1	XP_005312899.1	XP_005312833.1
OG0000020 XP_014451276.1	XP_014451277.1	XP_006259569.1	XP_006264377.1	XP_006264378.1	XP_014452628.1	XP_006264392.1	XP_006264391.1	XP_006264390.1	XP_006264389.1	XP_006264386.1	XP_006264385.1	XP_006264384.1	XP_006277361.1	XP_006277359.1	XP_006277358.1	XP_006277357.1	XP_006277355.1	XP_006277356.1	XP_006277347.1	XP_006277348.1	XP_006277349.1	XP_006277350.1	XP_006277351.1	XP_006277352.1	XP_006277353.1	XP_006277354.1	XP_006277346.1	XP_006277345.1	XP_014451279.1 ENSACAP00000010706.2	ENSACAP00000011244.2	ENSACAP00000013693.2	ENSACAP00000011709.3 XP_005285115.1	XP_005285114.1	XP_005285113.1	XP_008169831.1	XP_008170162.1	XP_008170160.1	XP_008170161.1	XP_005285094.1	XP_005285096.1	XP_005285095.1	XP_005285098.1	XP_005285100.1	XP_005285099.1	XP_005285102.1	XP_005285101.1	XP_005279110.1	XP_005279109.1	XP_008170159.1
OG0000021 XP_006276487.1 ENSACAP00000011731.2	ENSACAP00000010357.1 XP_005315098.1	XP_005315567.1	XP_005315566.1	XP_005315466.1	XP_005315223.1	XP_008176492.1	XP_005315351.1	XP_005315238.1	XP_005315543.1	XP_005315579.1	XP_005315230.1	XP_008176372.1	XP_008176337.1	XP_008175249.1	XP_005315292.2	XP_005315424.1	XP_005315284.1	XP_005314806.1	XP_008176304.1	XP_005315519.1	XP_005315087.1	XP_005315386.1	XP_008176212.1	XP_005315537.1	XP_005314805.1 ENSGALP00000000213.3 ENSP00000372738.2	ENSP00000403185.1	ENSP00000378786.2	ENSP00000364121.5	ENSP00000404940.1	ENSP00000388308.1	ENSP00000405500.1	ENSP00000393566.1	ENSP00000390725.2	ENSP00000372711.2	ENSP00000411610.2	ENSP00000410443.2	ENSP00000395737.2	ENSP00000402951.2	ENSP00000398838.2	ENSP00000405295.2	ENSP00000398819.2	ENSP00000393431.1	ENSP00000448003.1	ENSP00000414360.1	ENSP00000483966.1	ENSP00000392580.2	ENSP00000399068.1	ENSP00000404172.1	ENSP00000401098.1
OG0000022 XP_014455486.1	XP_014464732.1	XP_006266398.1 XP_005313213.2	XP_008175626.1	XP_008175587.1	XP_008167078.1	XP_008176073.1	XP_005314888.2	XP_008175529.1	XP_008176419.1	XP_008176418.1	XP_008175186.1	XP_008175187.1	XP_008175259.1 ENSP00000420250.1	ENSP00000401457.1	ENSP00000410866.2	ENSP00000418872.1	ENSP00000366095.3	ENSP00000383512.1	ENSP00000404149.2	ENSP00000449683.1	ENSP00000402139.1	ENSP00000403235.1	ENSP00000409534.1	ENSP00000396684.2	ENSP00000404362.2	ENSP00000383528.2	ENSP00000419736.1	ENSP00000419445.1	ENSP00000420339.1	ENSP00000380152.1	ENSP00000390785.2	ENSP00000474533.1	ENSP00000433749.1	ENSP00000434102.1	ENSP00000432138.1	ENSP00000435952.1	ENSP00000366937.2	ENSP00000348751.2	ENSP00000379932.3	ENSP00000366825.2	ENSP00000420147.1	ENSP00000414489.2	ENSP00000244519.2	ENSP00000419312.1	ENSP00000417234.1	ENSP00000355238.3	ENSP00000417717.1	ENSP00000390632.2	ENSP00000448879.1
OG0000023 XP_014458969.1	XP_014451305.1	XP_014458889.1	XP_014461098.1	XP_014448989.1	XP_014450657.1	XP_014457958.1	XP_014452468.1	XP_006278458.1 ENSACAP00000004132.3	ENSACAP00000021054.2	ENSACAP00000018151.1	ENSACAP00000019909.1	ENSACAP00000008597.2	ENSACAP00000018085.1	ENSACAP00000021012.1	ENSACAP00000019092.1	ENSACAP00000021130.1	ENSACAP00000019637.1	ENSACAP00000021087.1	ENSACAP00000019632.1	ENSACAP00000019560.1	ENSACAP00000023215.1	ENSACAP00000019432.2	ENSACAP00000019728.1	ENSACAP00000016215.2	ENSACAP00000005468.2	ENSACAP00000019000.1	ENSACAP00000019947.1	ENSACAP00000021980.1	ENSACAP00000021168.2	ENSACAP00000020412.1	ENSACAP00000019070.2	ENSACAP00000021326.1	ENSACAP00000019950.1	ENSACAP00000018778.1	ENSACAP00000019846.1	ENSACAP00000018882.1	ENSACAP00000021515.1	ENSACAP00000019767.1	ENSACAP00000021047.1	ENSACAP00000003803.2	ENSACAP00000021210.1	ENSACAP00000020796.1	ENSACAP00000018970.1	ENSACAP00000020813.1	ENSACAP00000019806.1 XP_008175239.1	XP_005313331.1	XP_005313330.1	XP_005313329.1	XP_005313332.1
OG0000024 XP_014455697.1	XP_014456227.1	XP_014456228.1	XP_014455993.1	XP_014455992.1	XP_014456229.1	XP_014455991.1	XP_014455990.1 ENSACAP00000007004.3 XP_008176007.1	XP_005313831.1	XP_005313830.1	XP_005313829.1	XP_005313828.1	XP_005280843.1	XP_005280841.1	XP_005280842.1	XP_008173949.1	XP_005289554.1	XP_008173948.1 ENSP00000471918.1	ENSP00000480429.1	ENSP00000478484.1	ENSP00000472818.1	ENSP00000388134.1	ENSP00000384083.1	ENSP00000384709.3	ENSP00000485920.1	ENSP00000469333.1	ENSP00000341725.4	ENSP00000411641.1	ENSP00000469926.1	ENSP00000469421.1	ENSP00000351165.2	ENSP00000470073.1	ENSP00000483598.2	ENSP00000387864.2	ENSP00000385739.2	ENSP00000488260.1	ENSP00000332215.5	ENSP00000221954.2	ENSP00000385932.1	ENSP00000006724.3	ENSP00000469547.1	ENSP00000244336.5	ENSP00000472885.1	ENSP00000466561.1	ENSP00000481247.1	ENSP00000244291.6	ENSP00000421986.1	ENSP00000469292.1	ENSP00000472423.1	ENSP00000473018.1
OG0000025 XP_006278981.1	XP_014449994.1	XP_014449992.1	XP_014451165.1	XP_014455147.1	XP_014458401.1	XP_014449995.1 ENSACAP00000019652.1	ENSACAP00000018454.1	ENSACAP00000020751.1 XP_005280679.1	XP_005280680.1	XP_005280681.1	XP_005314955.1	XP_005315439.1	XP_005280685.1	XP_005280684.1	XP_005280683.1	XP_005280682.1	XP_005315079.1	XP_005294634.1	XP_008170201.1	XP_005315067.2	XP_005280686.1	XP_005315325.1	XP_005314520.1 ENSGALP00000040017.2	ENSGALP00000042755.1	ENSGALP00000039987.1	ENSGALP00000041557.1	ENSGALP00000022185.2	ENSGALP00000040018.1	ENSGALP00000040636.1	ENSGALP00000042186.1	ENSGALP00000042994.1	ENSGALP00000029014.1	ENSGALP00000042608.1	ENSGALP00000005058.3	ENSGALP00000040664.1	ENSGALP00000040944.1	ENSGALP00000041859.1	ENSGALP00000029378.1	ENSGALP00000041314.1	ENSGALP00000040693.1	ENSGALP00000043430.1	ENSGALP00000040639.1	ENSGALP00000042149.1	ENSGALP00000043051.1	ENSGALP00000043182.1	ENSGALP00000039998.1	ENSGALP00000041265.1	ENSGALP00000009882.4	ENSGALP00000043375.1
OG0000026 XP_014454812.1	XP_014454813.1	XP_014464420.1	XP_006264680.2	XP_014464418.1	XP_006264679.2	XP_014454839.1	XP_014454838.1	XP_014454841.1	XP_014454840.1	XP_014454843.1	XP_014454842.1	XP_014454845.1	XP_014454844.1	XP_006264681.2	XP_014456825.1	XP_014464419.1 ENSACAP00000002449.3	ENSACAP00000001152.3	ENSACAP00000017080.2	ENSACAP00000012689.3	ENSACAP00000009154.3	ENSACAP00000001906.3	ENSACAP00000003307.3	ENSACAP00000009196.2 XP_008161227.1	XP_008161226.1	XP_008161225.1	XP_008161224.1	XP_008161223.1	XP_008161222.1	XP_008161220.1	XP_008161228.1	XP_008176747.1	XP_008172080.1	XP_005297205.1	XP_005297206.1	XP_008176649.1	XP_005297207.1	XP_005290442.1	XP_008161265.1	XP_008161264.1	XP_008176651.1	XP_008172078.1	XP_008172079.1	XP_008172076.1	XP_008172077.1	XP_008172074.1	XP_008172075.1	XP_008172073.1	XP_005290444.1	XP_005290445.1
OG0000027 XP_014451173.1	XP_014451172.1	XP_014451171.1	XP_014451170.1	XP_014451169.1	XP_014451168.1	XP_014452137.1	XP_014451167.1	XP_014462074.1	XP_014462075.1 ENSACAP00000001776.3	ENSACAP00000014731.2 XP_005286077.1	XP_005287610.1	XP_005287609.1	XP_005286078.1	XP_005287616.1	XP_005295718.1	XP_005287619.1	XP_005287620.1	XP_005295704.1	XP_005295706.1	XP_005295711.1	XP_005295712.1	XP_005295714.1	XP_005295715.1	XP_008175655.1	XP_005295708.1	XP_005295709.1	XP_005295716.1	XP_005295717.1	XP_005295698.1	XP_005295699.1	XP_005295700.1	XP_005295701.1	XP_005295694.1	XP_005295695.1	XP_005295696.1	XP_005295702.1	XP_005295703.1	XP_005287615.1	XP_005287617.1	XP_005287618.1	XP_005287611.1	XP_005287612.1	XP_005287613.1	XP_005287614.1	XP_005286075.1	XP_005286076.1	XP_008173670.1	XP_008173672.1	XP_005287622.1
OG0000028 XP_014455883.1	XP_006268902.1	XP_006268103.1	XP_006268109.1	XP_006269561.1	XP_006269557.1	XP_006269555.1	XP_006269566.1	XP_006268113.1	XP_006266895.1	XP_006260189.1	XP_014455974.1	XP_014455975.1	XP_006270869.1	XP_006270866.1	XP_006270867.1	XP_006270865.2 ENSACAP00000007928.2	ENSACAP00000015022.1	ENSACAP00000015034.2	ENSACAP00000011331.2	ENSACAP00000011335.2	ENSACAP00000004573.2	ENSACAP00000003249.1	ENSACAP00000017261.1	ENSACAP00000003268.2	ENSACAP00000021537.1	ENSACAP00000004563.1 XP_005308993.1	XP_005308991.1	XP_008172412.1	XP_005283306.1	XP_008172415.1	XP_005313469.1	XP_005283413.1	XP_005309008.1	XP_005309001.1	XP_008175320.1	XP_005288436.1	XP_005299869.1	XP_005313475.1	XP_005313471.1	XP_005315385.1 ENSGALP00000027026.4	ENSGALP00000041766.1	ENSGALP00000041269.1	ENSGALP00000042357.1	ENSGALP00000042371.1	ENSGALP00000040653.1	ENSGALP00000040715.1	ENSGALP00000043258.1	ENSGALP00000027025.3	ENSGALP00000040820.1 ENSP00000489311.1
OG0000029 XP_006264325.2	XP_014448983.1	XP_014450764.1	XP_006275235.1	XP_014454401.1	XP_014456105.1	XP_014456104.1	XP_014455468.1	XP_014455467.1	XP_014457017.1	XP_006268563.2 ENSACAP00000014688.3	ENSACAP00000011219.2 XP_008174446.1	XP_008175926.1	XP_005314053.1	XP_008175388.1	XP_008174063.1	XP_008174062.1	XP_008174061.1	XP_005294391.1	XP_008174066.1	XP_008174065.1	XP_008174064.1	XP_008174067.1 ENSGALP00000001272.4 ENSP00000379800.3	ENSP00000450288.1	ENSP00000448485.2	ENSP00000400222.1	ENSP00000391917.1	ENSP00000448572.1	ENSP00000409819.1	ENSP00000448191.2	ENSP00000379796.1	ENSP00000401071.2	ENSP00000415259.1	ENSP00000365847.5	ENSP00000406019.1	ENSP00000379797.1	ENSP00000388224.1	ENSP00000365844.4	ENSP00000397043.1	ENSP00000414525.1	ENSP00000449272.1	ENSP00000447432.2	ENSP00000446993.2	ENSP00000449847.1	ENSP00000411949.1	ENSP00000388149.1	ENSP00000355437.3	ENSP00000426496.1	ENSP00000343765.5	ENSP00000392130.1
OG0000030 XP_014460482.1	XP_014460524.1	XP_014460807.1	XP_014453326.1	XP_006263037.1	XP_006268527.1	XP_014453328.1	XP_006278033.1	XP_006264998.1	XP_014458798.1	XP_014458799.1 ENSACAP00000008578.3	ENSACAP00000016583.2	ENSACAP00000004613.2	ENSACAP00000023297.1	ENSACAP00000004918.3	ENSACAP00000004869.2	ENSACAP00000013701.3	ENSACAP00000018246.1	ENSACAP00000014225.2	ENSACAP00000022807.1	ENSACAP00000004915.2	ENSACAP00000008184.3	ENSACAP00000018964.1	ENSACAP00000022643.1	ENSACAP00000004920.2	ENSACAP00000010270.2	ENSACAP00000021912.1	ENSACAP00000014999.2	ENSACAP00000003921.2	ENSACAP00000002930.2	ENSACAP00000008429.2	ENSACAP00000004548.2	ENSACAP00000019249.2	ENSACAP00000021774.1	ENSACAP00000014296.3	ENSACAP00000020020.1 XP_005311419.1	XP_005311418.1	XP_005311417.1	XP_005311416.1	XP_005311415.1	XP_005311414.1	XP_005311413.1	XP_005311412.1	XP_005311411.1	XP_008175455.1	XP_008174324.1	XP_008173683.1	XP_008173288.1	XP_008173279.1	XP_008173278.1
OG0000031 ENSACAP00000019603.1	ENSACAP00000021637.1	ENSACAP00000018861.1	ENSACAP00000021205.1	ENSACAP00000018563.1	ENSACAP00000023367.1	ENSACAP00000018179.1	ENSACAP00000023357.1	ENSACAP00000021101.1	ENSACAP00000019970.1	ENSACAP00000019080.1	ENSACAP00000020872.1	ENSACAP00000020142.1	ENSACAP00000020933.1	ENSACAP00000019043.1	ENSACAP00000023023.1	ENSACAP00000021124.1	ENSACAP00000019262.1	ENSACAP00000021147.1	ENSACAP00000018845.1	ENSACAP00000018080.1	ENSACAP00000018930.1	ENSACAP00000019359.1	ENSACAP00000021299.1	ENSACAP00000021833.1	ENSACAP00000018951.1	ENSACAP00000019989.1	ENSACAP00000018539.1	ENSACAP00000018674.1	ENSACAP00000020639.1	ENSACAP00000023164.1	ENSACAP00000019336.1	ENSACAP00000022704.1	ENSACAP00000021010.1	ENSACAP00000021318.1	ENSACAP00000020857.1	ENSACAP00000018330.1	ENSACAP00000020436.1	ENSACAP00000018178.1	ENSACAP00000022649.1	ENSACAP00000019466.1	ENSACAP00000022459.1	ENSACAP00000018691.1	ENSACAP00000023312.1	ENSACAP00000020657.1	ENSACAP00000020471.1	ENSACAP00000022392.1	ENSACAP00000018934.1	ENSACAP00000020646.1	ENSACAP00000022068.1
OG0000032 XP_014462570.1	XP_006269425.1	XP_014462569.1	XP_006263729.1	XP_014456919.1	XP_006269427.1	XP_014462566.1	XP_014462567.1	XP_014456263.1	XP_006275436.2	XP_014456265.1	XP_014462568.1	XP_014456259.1	XP_014456260.1	XP_014456261.1	XP_014456262.1	XP_014456264.1 ENSACAP00000011591.3	ENSACAP00000011742.3 XP_005290404.1	XP_005290399.1	XP_005290400.1	XP_008164685.1	XP_008164686.1	XP_005312426.1	XP_005312424.1	XP_005312423.1	XP_005312425.1	XP_005290385.1	XP_005290384.1	XP_005290388.1	XP_005290381.1	XP_005290389.1	XP_005290394.1	XP_005290393.1	XP_005290396.1	XP_005290395.1	XP_008167868.1	XP_008167870.1	XP_005290382.1	XP_005290383.1	XP_005290378.1	XP_005290379.1	XP_005295865.1	XP_005295866.1	XP_005290387.1	XP_008169612.1	XP_008169613.1	XP_008169616.1	XP_008169617.1	XP_008169614.1	XP_008169615.1
OG0000033 XP_014462360.1	XP_014465979.1	XP_014465978.1	XP_014465981.1	XP_014465980.1	XP_014465983.1	XP_014465982.1	XP_006276200.2	XP_014465977.1	XP_014465976.1 ENSACAP00000013501.2	ENSACAP00000006866.3 XP_008166772.1	XP_008166773.1	XP_008166770.1	XP_008166771.1	XP_008166776.1	XP_008166777.1	XP_008166774.1	XP_008166775.1	XP_008166790.1	XP_008166778.1	XP_008166779.1	XP_005284185.1	XP_005284184.1	XP_005284181.1	XP_005284183.1	XP_005284182.1	XP_008166786.1	XP_008166787.1	XP_008166784.1	XP_008166785.1	XP_008166782.1	XP_008166783.1	XP_008166780.1	XP_008166781.1	XP_008166788.1	XP_008166789.1	XP_008166759.1	XP_008171188.1	XP_008171187.1	XP_008166765.1	XP_008166764.1	XP_008166767.1	XP_008166766.1	XP_008166761.1	XP_008166763.1	XP_008166762.1	XP_008166769.1	XP_008166768.1	XP_005284190.1	XP_005284188.1
OG0000034 XP_014451733.1	XP_014455742.1	XP_014462437.1	XP_014455743.1	XP_014455741.1 ENSACAP00000022877.1	ENSACAP00000010307.2	ENSACAP00000018512.2	ENSACAP00000018977.2 XP_005312516.1	XP_008176010.1	XP_005315533.1	XP_008174138.1	XP_005310013.2	XP_008176293.1	XP_008174518.1	XP_008174514.1	XP_008174513.1	XP_008174512.1	XP_008174511.1	XP_008174130.1	XP_005313981.2	XP_008174135.1	XP_008174137.1	XP_008174136.1	XP_008174517.1	XP_005314610.2	XP_008175689.1	XP_008175688.1	XP_008174515.1	XP_005314825.2	XP_005293973.1	XP_008174128.1	XP_005293982.1	XP_005312524.2	XP_005312519.1	XP_005312521.2	XP_005312515.1	XP_005312512.2 ENSP00000473238.1	ENSP00000455510.2	ENSP00000398891.2	ENSP00000412361.2	ENSP00000407387.1	ENSP00000473125.1	ENSP00000410679.1	ENSP00000345243.4	ENSP00000306757.6	ENSP00000469626.1	ENSP00000470259.1	ENSP00000291707.3	ENSP00000469791.1	ENSP00000354090.5
OG0000035 XP_014460398.1	XP_014460394.1	XP_014455729.1	XP_014464161.1	XP_014460390.1	XP_014460393.1	XP_014460396.1	XP_014460397.1	XP_014460389.1	XP_014460392.1	XP_014460395.1 ENSACAP00000013915.2	ENSACAP00000008154.2	ENSACAP00000004916.3 XP_005281210.1	XP_005281211.1	XP_005281212.1	XP_005281213.1	XP_008167042.1	XP_008167538.1	XP_008167041.1	XP_008167536.1	XP_008164930.1	XP_008167534.1	XP_008167535.1	XP_005281214.1	XP_005281215.1	XP_008167531.1	XP_005281220.1	XP_005281219.1	XP_005281218.1	XP_005281217.1	XP_008167532.1	XP_008167533.1	XP_005295276.1	XP_005295275.1	XP_005295269.1	XP_005295268.1	XP_005295267.1	XP_005295266.1	XP_005295274.1	XP_005295273.1	XP_005295272.1	XP_005295271.1	XP_005307166.1	XP_005295264.1	XP_005295265.1	XP_005295259.1	XP_005295260.1	XP_005295258.1	XP_005295262.1	XP_005295263.1
OG0000036 XP_014466376.1	XP_006268903.2	XP_006268111.1	XP_006268102.1	XP_006268110.1	XP_006264747.1	XP_006269563.1	XP_006269560.1	XP_006264746.1	XP_006264745.1	XP_006264743.1	XP_014461975.1	XP_014461977.1	XP_014466375.1	XP_006264742.1 ENSACAP00000015039.1	ENSACAP00000003251.1	ENSACAP00000003259.1	ENSACAP00000015019.1	ENSACAP00000004273.1	ENSACAP00000021523.1	ENSACAP00000004279.1	ENSACAP00000018756.1 XP_005308986.1	XP_005308994.1	XP_005308992.1	XP_005313470.1	XP_005313468.1	XP_005289783.1	XP_008172410.1	XP_005312549.1	XP_005309002.1	XP_005309006.1	XP_005313476.1	XP_008175319.1 ENSGALP00000042437.1	ENSGALP00000042501.1	ENSGALP00000021742.4	ENSGALP00000037260.1	ENSGALP00000037324.2	ENSGALP00000021743.3 ENSP00000375736.2	ENSP00000358151.2	ENSP00000481622.1	ENSP00000479284.1	ENSP00000380180.1	ENSP00000479169.1	ENSP00000321744.4	ENSP00000482674.1	ENSP00000476136.1	ENSP00000380177.3	ENSP00000367008.4	ENSP00000489317.1	ENSP00000483237.1
OG0000037 XP_014452184.1	XP_014463782.1	XP_014452231.1	XP_014456597.1	XP_014463781.1 ENSACAP00000021589.2	ENSACAP00000001611.3	ENSACAP00000001434.2	ENSACAP00000021227.2	ENSACAP00000014918.3 XP_005301861.1	XP_005301856.1	XP_005301850.1	XP_008177919.1	XP_005307985.1	XP_008177915.1	XP_008177916.1	XP_005307984.1	XP_005307981.1	XP_008177912.1	XP_005307980.1	XP_005292038.1	XP_005292039.1	XP_005292036.1	XP_005292037.1	XP_005292040.1	XP_005292041.1	XP_008177914.1	XP_005301725.1	XP_005307987.1	XP_008177917.1	XP_005307982.1	XP_008177913.1	XP_008169131.1	XP_008169129.1	XP_008169128.1	XP_008169127.1	XP_008169126.1	XP_008169124.1	XP_008169123.1	XP_005307983.1	XP_005292044.1	XP_005292045.1	XP_005292042.1	XP_005292043.1	XP_005292048.1	XP_005292049.1	XP_005292046.1	XP_005292047.1	XP_005292050.1	XP_008169135.1	XP_008169136.1
OG0000038 XP_014451995.1	XP_006274109.1	XP_014458764.1	XP_006265076.2	XP_014451948.1	XP_014451984.1 ENSACAP00000008001.2	ENSACAP00000006348.3	ENSACAP00000013862.2	ENSACAP00000019497.1	ENSACAP00000017980.2	ENSACAP00000004498.3	ENSACAP00000004502.2 XP_005314918.1	XP_005307936.1	XP_005314914.2	XP_008176084.1	XP_005314845.1	XP_008177950.1	XP_005308043.1	XP_005308046.2	XP_005312746.1	XP_008174769.1	XP_005307935.1	XP_005313660.1	XP_005314876.1	XP_005315028.1	XP_005308052.1	XP_005308051.1	XP_005305638.1	XP_008174770.1	XP_008174771.1	XP_008177949.1	XP_005314877.1	XP_005315083.1	XP_008177897.1	XP_008177939.1	XP_005307934.1	XP_005315336.1	XP_005307937.1	XP_005307923.1	XP_005307924.1	XP_005307921.1	XP_005307922.1	XP_005314658.1	XP_008177899.1	XP_005312748.1	XP_008176113.1	XP_005314973.1	XP_008177901.1	XP_008177900.1 ENSGALP00000002532.3 ENSP00000480336.1	ENSP00000321549.5
OG0000039 XP_006268682.2	XP_006268683.1	XP_014463890.1	XP_014463889.1	XP_006269869.1	XP_006270479.1	XP_014453738.1 ENSACAP00000006690.2	ENSACAP00000017739.2	ENSACAP00000017958.2 XP_008171750.1	XP_008168702.1	XP_008171748.1	XP_005300617.2	XP_005300616.2	XP_005300618.1	XP_005289770.1	XP_005289769.1	XP_005289768.1	XP_005289767.1	XP_005297420.1	XP_008171749.1	XP_005281730.1 ENSGALP00000029090.2 ENSP00000386201.1	ENSP00000480069.1	ENSP00000461365.1	ENSP00000375093.2	ENSP00000441624.1	ENSP00000240615.2	ENSP00000240687.2	ENSP00000476190.1	ENSP00000371932.2	ENSP00000444736.1	ENSP00000487978.1	ENSP00000461683.1	ENSP00000482990.1	ENSP00000405095.1	ENSP00000436450.1	ENSP00000240691.2	ENSP00000334050.1	ENSP00000458723.1	ENSP00000478843.1	ENSP00000375091.2	ENSP00000488357.1	ENSP00000484163.1	ENSP00000482280.2	ENSP00000458544.1	ENSP00000461533.1	ENSP00000247883.4	ENSP00000488110.1	ENSP00000484743.1	ENSP00000478277.1	ENSP00000478012.1
OG0000040 ENSACAP00000011469.2	ENSACAP00000018958.1	ENSACAP00000018744.1	ENSACAP00000008072.2	ENSACAP00000018580.1	ENSACAP00000020474.1	ENSACAP00000020791.1	ENSACAP00000020440.1	ENSACAP00000020056.1	ENSACAP00000019495.1	ENSACAP00000019078.1	ENSACAP00000013303.2	ENSACAP00000018678.1	ENSACAP00000019176.1	ENSACAP00000018419.1	ENSACAP00000020084.1	ENSACAP00000021005.1	ENSACAP00000011586.2	ENSACAP00000020888.1	ENSACAP00000019966.1	ENSACAP00000020393.1	ENSACAP00000019411.1	ENSACAP00000019360.1	ENSACAP00000021622.1	ENSACAP00000019105.1	ENSACAP00000020695.1	ENSACAP00000019340.1	ENSACAP00000021538.1	ENSACAP00000021939.1	ENSACAP00000019115.1	ENSACAP00000018139.1	ENSACAP00000018644.1	ENSACAP00000021201.1	ENSACAP00000019644.1	ENSACAP00000021435.1	ENSACAP00000021287.1	ENSACAP00000022001.1	ENSACAP00000021179.1	ENSACAP00000018380.1	ENSACAP00000020565.1	ENSACAP00000019547.1	ENSACAP00000021277.1	ENSACAP00000020555.1	ENSACAP00000020704.1	ENSACAP00000021462.1	ENSACAP00000017992.1	ENSACAP00000018515.1	ENSACAP00000021334.1	ENSACAP00000019926.1	ENSACAP00000018088.1
OG0000041 XP_014453283.1	XP_014456110.1	XP_014463737.1 ENSACAP00000013466.3	ENSACAP00000022869.1	ENSACAP00000007152.2	ENSACAP00000000282.3	ENSACAP00000023429.1	ENSACAP00000007143.2	ENSACAP00000018146.2 XP_005315027.1	XP_008169645.1	XP_008175778.1	XP_005315421.1	XP_005312390.1	XP_005312391.1	XP_005313267.1 ENSP00000405928.1	ENSP00000388031.1	ENSP00000365942.3	ENSP00000402414.2	ENSP00000369366.1	ENSP00000393052.1	ENSP00000404933.1	ENSP00000392508.2	ENSP00000407291.2	ENSP00000401123.1	ENSP00000394599.1	ENSP00000428770.1	ENSP00000393186.1	ENSP00000405498.1	ENSP00000406984.1	ENSP00000365878.2	ENSP00000406918.1	ENSP00000401131.2	ENSP00000393560.2	ENSP00000429555.1	ENSP00000397688.2	ENSP00000244360.6	ENSP00000380058.3	ENSP00000373106.2	ENSP00000404586.1	ENSP00000394768.1	ENSP00000421784.1	ENSP00000486934.1	ENSP00000415281.2	ENSP00000415671.1	ENSP00000387930.2	ENSP00000405340.2	ENSP00000447500.2	ENSP00000396849.1	ENSP00000449686.2	ENSP00000420451.1
OG0000042 XP_014458765.1	XP_014453440.1	XP_014461824.1 ENSACAP00000018193.1	ENSACAP00000011423.3	ENSACAP00000011442.3	ENSACAP00000023300.1	ENSACAP00000020207.2	ENSACAP00000023009.1	ENSACAP00000023273.1 XP_005311364.2	XP_005311363.1	XP_008173603.1	XP_008173607.1	XP_008173608.1	XP_005312727.1	XP_005312297.1	XP_008174649.1	XP_005313697.1	XP_005313138.1	XP_005311361.1	XP_005311362.1	XP_008175585.1	XP_005312610.1	XP_005313698.1	XP_008169557.1	XP_005312584.1	XP_005279393.1	XP_005295807.1	XP_005315105.1	XP_005312592.1	XP_005312593.1	XP_005312300.1	XP_008174650.1	XP_008174652.1 ENSGALP00000000187.3	ENSGALP00000042864.1 ENSP00000438244.1	ENSP00000346919.3	ENSP00000483880.1	ENSP00000483713.1	ENSP00000279545.4 ENSPSIP00000016444.1	ENSPSIP00000018468.1	ENSPSIP00000007117.1	ENSPSIP00000017362.1	ENSPSIP00000017374.1	ENSPSIP00000006468.1	ENSPSIP00000010559.1	ENSPSIP00000005966.1	ENSPSIP00000013776.1	ENSPSIP00000004584.1	ENSPSIP00000018612.1	ENSPSIP00000002634.1	ENSPSIP00000017469.1
OG0000043 XP_014464400.1	XP_014452035.1	XP_006261888.2	XP_014464919.1 ENSACAP00000013193.2	ENSACAP00000011382.3	ENSACAP00000011422.2	ENSACAP00000011927.3	ENSACAP00000009750.3 XP_008177819.1	XP_008173987.1	XP_005293262.1	XP_005293263.1	XP_005293261.1	XP_008177840.1	XP_008177841.1	XP_008162493.1	XP_008177839.1	XP_008177838.1	XP_008177837.1	XP_008177836.1	XP_008177835.1	XP_008177834.1	XP_008177832.1	XP_008177831.1	XP_008177830.1	XP_008177820.1	XP_008177828.1	XP_008177829.1	XP_008177824.1	XP_008177825.1	XP_008177826.1	XP_008177827.1	XP_008177821.1	XP_008177822.1 ENSGALP00000035486.2	ENSGALP00000001033.4	ENSGALP00000021230.4 ENSP00000329877.7	ENSP00000382557.1	ENSP00000341092.3	ENSP00000382537.1	ENSP00000382515.1	ENSP00000382510.1	ENSP00000382549.1	ENSP00000266376.6	ENSP00000382500.1	ENSP00000382512.1	ENSP00000385724.3	ENSP00000382526.1	ENSP00000382542.1	ENSP00000385896.3	ENSP00000482910.1	ENSP00000479029.1
OG0000044 XP_006269797.1	XP_006269798.1	XP_006265660.2	XP_014456665.1	XP_006271811.1	XP_014463444.1 ENSACAP00000017410.2	ENSACAP00000022106.1	ENSACAP00000016928.2	ENSACAP00000001036.2	ENSACAP00000012656.1	ENSACAP00000014962.3	ENSACAP00000017398.2 XP_005310210.1	XP_005282732.1	XP_005282731.1	XP_008174075.1	XP_005303015.1	XP_005282388.1	XP_005282730.1	XP_005308246.1 ENSGALP00000042665.1	ENSGALP00000042274.1	ENSGALP00000020884.4	ENSGALP00000000073.4	ENSGALP00000013964.3	ENSGALP00000012034.3	ENSGALP00000022436.4 ENSP00000383374.1	ENSP00000443590.1	ENSP00000393340.1	ENSP00000400663.2	ENSP00000401317.2	ENSP00000403868.1	ENSP00000400108.1	ENSP00000406981.1	ENSP00000414479.1	ENSP00000399155.2	ENSP00000394124.1	ENSP00000401546.1	ENSP00000416480.1	ENSP00000395838.1	ENSP00000369703.2	ENSP00000341289.4	ENSP00000391515.1	ENSP00000399280.1	ENSP00000394841.1	ENSP00000403213.1	ENSP00000217133.1	ENSP00000410829.2	ENSP00000339001.7	ENSP00000413589.1	ENSP00000407673.1	ENSP00000392914.1
OG0000045 XP_014463973.1	XP_014453362.1	XP_014453364.1	XP_014459775.1	XP_006259299.2	XP_014464945.1	XP_014463456.1	XP_014449214.1	XP_014461434.1	XP_014462490.1 ENSACAP00000006366.3	ENSACAP00000018603.1	ENSACAP00000003009.2	ENSACAP00000007706.2	ENSACAP00000018317.2	ENSACAP00000019987.1	ENSACAP00000018622.1	ENSACAP00000013673.2	ENSACAP00000006420.3	ENSACAP00000020986.1	ENSACAP00000000544.3	ENSACAP00000006547.2	ENSACAP00000018536.2	ENSACAP00000019604.2	ENSACAP00000018398.2	ENSACAP00000016954.3	ENSACAP00000019090.1	ENSACAP00000021228.1	ENSACAP00000010940.2 XP_008176003.1	XP_005314554.1	XP_005315126.2	XP_005313655.1	XP_005313656.1	XP_008175454.1	XP_008175672.1	XP_008175901.1	XP_008176228.1	XP_005308282.1	XP_005315109.1	XP_005279689.2 ENSGALP00000017922.4	ENSGALP00000042857.1	ENSGALP00000042920.1	ENSGALP00000000138.4	ENSGALP00000041797.1	ENSGALP00000042327.1	ENSGALP00000041779.1	ENSGALP00000000235.3	ENSGALP00000009984.3	ENSGALP00000021123.4	ENSGALP00000004106.4	ENSGALP00000043158.1
OG0000046 XP_006262821.1 ENSACAP00000020171.1	ENSACAP00000018569.1	ENSACAP00000020299.1	ENSACAP00000017987.1	ENSACAP00000019153.1	ENSACAP00000021402.1	ENSACAP00000018356.1	ENSACAP00000021301.1	ENSACAP00000019517.1	ENSACAP00000014211.2	ENSACAP00000018468.1	ENSACAP00000020381.1	ENSACAP00000019426.1	ENSACAP00000021321.1	ENSACAP00000020252.1	ENSACAP00000021480.1	ENSACAP00000010062.2	ENSACAP00000021678.1	ENSACAP00000019538.1	ENSACAP00000019905.1	ENSACAP00000020985.1	ENSACAP00000020923.1	ENSACAP00000018362.1	ENSACAP00000019831.1	ENSACAP00000021549.1	ENSACAP00000021542.1	ENSACAP00000020552.1	ENSACAP00000021230.1	ENSACAP00000019285.1	ENSACAP00000019968.1	ENSACAP00000019042.1	ENSACAP00000021390.1	ENSACAP00000021431.1	ENSACAP00000021146.1	ENSACAP00000018731.1	ENSACAP00000019268.1	ENSACAP00000019562.1	ENSACAP00000021401.1	ENSACAP00000020314.1	ENSACAP00000020347.1	ENSACAP00000021044.1	ENSACAP00000019493.1	ENSACAP00000018281.1	ENSACAP00000019609.1	ENSACAP00000018809.1	ENSACAP00000019088.1	ENSACAP00000018791.1	ENSACAP00000011098.2	ENSACAP00000018213.1	ENSACAP00000018736.1
OG0000047 XP_014457019.1 ENSACAP00000010483.3 XP_008174846.1 ENSP00000404636.1	ENSP00000432502.1	ENSP00000447950.1	ENSP00000392069.1	ENSP00000410212.1	ENSP00000411625.1	ENSP00000387444.1	ENSP00000431928.1	ENSP00000392885.1	ENSP00000406219.2	ENSP00000411007.1	ENSP00000432964.1	ENSP00000448877.1	ENSP00000405631.1	ENSP00000436963.1	ENSP00000396541.1	ENSP00000403457.1	ENSP00000382573.1	ENSP00000382570.1	ENSP00000475541.1	ENSP00000476061.1	ENSP00000382568.1	ENSP00000457534.1	ENSP00000455087.1	ENSP00000393813.1	ENSP00000432308.1	ENSP00000408703.1	ENSP00000433323.1	ENSP00000412827.1	ENSP00000389930.1	ENSP00000399320.1	ENSP00000398462.2	ENSP00000412655.1	ENSP00000449114.1	ENSP00000456236.1	ENSP00000454948.1	ENSP00000382750.1	ENSP00000382749.1	ENSP00000409804.1	ENSP00000372789.2	ENSP00000435258.1	ENSP00000393629.1	ENSP00000392744.1	ENSP00000399332.1	ENSP00000372637.2	ENSP00000402159.1	ENSP00000416062.1	ENSP00000397037.1	ENSP00000412844.1	ENSP00000410001.1
OG0000048 XP_014458868.1 ENSACAP00000016972.3 XP_008175675.1 ENSP00000425682.1	ENSP00000421992.1	ENSP00000421393.1	ENSP00000390027.2	ENSP00000421523.1	ENSP00000414323.2	ENSP00000426883.1	ENSP00000422503.1	ENSP00000410018.1	ENSP00000420941.1	ENSP00000398715.2	ENSP00000405010.1	ENSP00000412354.1	ENSP00000391707.1	ENSP00000399555.1	ENSP00000479660.1	ENSP00000414578.1	ENSP00000383257.1	ENSP00000383263.3	ENSP00000404757.1	ENSP00000373019.4	ENSP00000400469.1	ENSP00000388748.1	ENSP00000425435.1	ENSP00000424164.1	ENSP00000424335.1	ENSP00000389303.1	ENSP00000420911.1	ENSP00000425377.1	ENSP00000402432.1	ENSP00000425595.1	ENSP00000409907.1	ENSP00000397856.1	ENSP00000394964.1	ENSP00000372832.4	ENSP00000390479.1	ENSP00000398934.1	ENSP00000383205.3	ENSP00000409157.1	ENSP00000401869.1	ENSP00000408590.1	ENSP00000399391.1	ENSP00000390313.1	ENSP00000408012.2	ENSP00000383204.1	ENSP00000393042.2	ENSP00000396155.1	ENSP00000389758.1	ENSP00000404715.1	ENSP00000389131.1
OG0000049 XP_006269304.1	XP_014460645.1	XP_006265010.1	XP_006268823.1	XP_014466379.1	XP_014466373.1 ENSACAP00000003255.2	ENSACAP00000010511.2	ENSACAP00000021479.1	ENSACAP00000007128.2	ENSACAP00000003271.1	ENSACAP00000017755.1	ENSACAP00000018165.1	ENSACAP00000004282.2	ENSACAP00000005900.2 XP_005308989.1	XP_008172411.1	XP_008172413.1	XP_005289629.1	XP_005289630.1	XP_005297556.1	XP_008173276.1	XP_008173275.1	XP_008173274.1	XP_008173273.1 ENSGALP00000040613.1	ENSGALP00000042290.1	ENSGALP00000040771.1	ENSGALP00000003584.2	ENSGALP00000040958.1	ENSGALP00000031320.3 ENSP00000465813.1	ENSP00000468714.1	ENSP00000465403.1	ENSP00000466020.1	ENSP00000484638.1	ENSP00000466663.1	ENSP00000484658.1	ENSP00000254810.3	ENSP00000484841.1	ENSP00000385479.1	ENSP00000355780.3	ENSP00000484095.1	ENSP00000355657.1	ENSP00000355778.1	ENSP00000355781.1	ENSP00000476960.1	ENSP00000489282.1	ENSP00000333277.1	ENSP00000483283.1	ENSP00000352252.2	ENSP00000339835.3	ENSP00000480826.1	ENSP00000366999.1
OG0000050 XP_014458511.1	XP_014453885.1	XP_014460635.1	XP_014454468.1	XP_014462279.1	XP_014459060.1	XP_014462097.1	XP_014460979.1	XP_014456500.1	XP_014466475.1	XP_014465562.1	XP_014449616.1	XP_014454801.1	XP_014457583.1 XP_005281549.1	XP_008173680.1	XP_005286770.1	XP_008165060.1	XP_005315177.1	XP_008176374.1	XP_008175745.1	XP_005312691.2	XP_008166527.1	XP_008171523.1	XP_005313253.1	XP_005314244.1	XP_005315065.1	XP_005296626.1	XP_008175443.1	XP_008172260.1	XP_005293898.1	XP_005287776.1	XP_008172921.1	XP_008176407.1	XP_008175316.1 ENSGALP00000042471.1	ENSGALP00000041247.1	ENSGALP00000042915.1 ENSPSIP00000000889.1	ENSPSIP00000015407.1	ENSPSIP00000000226.1	ENSPSIP00000002972.1	ENSPSIP00000001194.1	ENSPSIP00000001750.1	ENSPSIP00000000053.1	ENSPSIP00000020169.1	ENSPSIP00000001610.1	ENSPSIP00000000456.1	ENSPSIP00000001062.1	ENSPSIP00000001037.1	ENSPSIP00000000353.1	ENSPSIP00000000965.1	ENSPSIP00000015703.1
OG0000051 ENSP00000479222.1	ENSP00000482342.1	ENSP00000482677.1	ENSP00000477986.1	ENSP00000484847.1	ENSP00000483780.1	ENSP00000480002.1	ENSP00000480145.1	ENSP00000484779.1	ENSP00000483840.1	ENSP00000484831.1	ENSP00000479368.1	ENSP00000484235.1	ENSP00000479507.1	ENSP00000481370.1	ENSP00000481747.1	ENSP00000481618.1	ENSP00000482189.1	ENSP00000479600.1	ENSP00000484520.1	ENSP00000481479.1	ENSP00000483028.1	ENSP00000478204.1	ENSP00000483810.1	ENSP00000484989.1	ENSP00000481612.1	ENSP00000339515.4	ENSP00000344358.4	ENSP00000471986.1	ENSP00000482071.1	ENSP00000349972.4	ENSP00000480741.1	ENSP00000477939.1	ENSP00000478452.1	ENSP00000478855.1	ENSP00000479161.1	ENSP00000479809.1	ENSP00000480947.1	ENSP00000482092.1	ENSP00000483611.1	ENSP00000481235.1	ENSP00000483184.1	ENSP00000480657.1	ENSP00000483452.1	ENSP00000477625.1	ENSP00000484377.1	ENSP00000478507.1	ENSP00000484221.1	ENSP00000291890.3	ENSP00000482536.1
OG0000052 XP_006278917.1	XP_006278916.1	XP_006278913.1	XP_006278912.1	XP_006278915.1	XP_006278914.1	XP_006278909.1	XP_006278908.1	XP_006278911.1	XP_006278910.1	XP_006278927.1	XP_006278928.1	XP_006278902.1	XP_006278920.1	XP_006278921.1	XP_014459631.1	XP_006278919.1	XP_006278925.1	XP_014459632.1	XP_006278922.1	XP_006278923.1	XP_006278905.1	XP_014457727.1	XP_014457723.1	XP_014457722.1	XP_014457725.1	XP_014457724.1	XP_014457721.1	XP_006278903.1	XP_006261972.2	XP_006278929.1	XP_006278930.1	XP_006278931.1	XP_006278932.1	XP_006278918.1	XP_014459633.1	XP_006278926.1	XP_006278906.1	XP_006278907.1 ENSACAP00000009483.3	ENSACAP00000016567.3 XP_008175046.1	XP_008162731.1 ENSGALP00000010605.4	ENSGALP00000010606.4 ENSP00000470777.1	ENSP00000469564.1	ENSP00000353535.5	ENSP00000278317.6	ENSP00000415614.1	ENSP00000370969.2	ENSP00000371001.3	ENSP00000370991.3	ENSP00000370975.4
OG0000053 XP_014461477.1	XP_014456866.1	XP_014453534.1	XP_014456233.1	XP_014459063.1	XP_006277341.2	XP_006277342.1	XP_014465517.1	XP_006270668.2	XP_014456235.1 ENSACAP00000017511.2	ENSACAP00000017274.3	ENSACAP00000015028.3	ENSACAP00000014848.3	ENSACAP00000022178.1	ENSACAP00000020699.2 XP_008171844.1	XP_008171847.1	XP_008171846.1	XP_008171843.1	XP_005312742.2	XP_008174768.1	XP_008171852.1	XP_008171853.1	XP_008171854.1	XP_005314920.2	XP_005313430.1	XP_005313067.1	XP_008175435.1	XP_008175011.1	XP_008175010.1	XP_008175037.1	XP_008175036.1	XP_008168252.1	XP_008175008.1	XP_008175434.1	XP_008175315.1 ENSGALP00000036402.2	ENSGALP00000019434.4	ENSGALP00000023008.4	ENSGALP00000000383.4	ENSGALP00000036406.2	ENSGALP00000019430.4	ENSGALP00000042297.1 ENSP00000438292.1	ENSP00000440057.1	ENSP00000443174.1	ENSP00000445674.1	ENSP00000479893.1	ENSP00000299698.7	ENSP00000323929.7	ENSP00000488166.1	ENSP00000487815.1	ENSP00000261336.2 ENSPSIP00000016473.1
OG0000054 XP_014449951.1	XP_014466617.1	XP_014466610.1	XP_014466611.1	XP_014466608.1	XP_014466609.1	XP_014466614.1	XP_014466615.1	XP_014466612.1	XP_014466613.1	XP_014466607.1	XP_014466606.1 ENSACAP00000006425.2	ENSACAP00000003198.2	ENSACAP00000003206.2	ENSACAP00000003292.2 XP_008169260.1	XP_008169261.1	XP_008161988.1	XP_008169251.1	XP_008169250.1	XP_008169253.1	XP_008169252.1	XP_008169255.1	XP_008169254.1	XP_008169257.1	XP_008169256.1	XP_008169259.1	XP_008169258.1	XP_005302186.1	XP_005302187.1	XP_005302184.1	XP_005302185.1	XP_005302191.1	XP_005302192.1	XP_005302188.1	XP_005302190.1	XP_008169248.1	XP_008169249.1	XP_008169246.1	XP_008169247.1	XP_008169244.1	XP_008169245.1	XP_008169242.1	XP_008169243.1	XP_008169240.1	XP_008169241.1 ENSGALP00000026214.3	ENSGALP00000042856.1	ENSGALP00000042793.1	ENSGALP00000005847.4 ENSP00000362006.3	ENSP00000244364.6	ENSP00000431179.2
OG0000055 XP_014454576.1	XP_014454577.1	XP_014454574.1	XP_014454575.1	XP_014454572.1	XP_014454573.1	XP_014454570.1	XP_014454571.1	XP_014454568.1	XP_014454549.1	XP_014454580.1	XP_014454581.1	XP_014454578.1	XP_014454579.1	XP_014454545.1	XP_014454544.1	XP_014454547.1	XP_014454546.1	XP_014454559.1	XP_014454558.1	XP_014454561.1	XP_014454560.1	XP_014454563.1	XP_014454562.1	XP_014454565.1	XP_014454564.1	XP_014454567.1	XP_014454566.1	XP_014454548.1	XP_014454550.1	XP_014454551.1	XP_014454552.1	XP_014454553.1	XP_014454554.1	XP_014454555.1	XP_014454556.1	XP_014454557.1 ENSACAP00000011523.2 XP_008177276.1	XP_008177818.1	XP_008177959.1	XP_008177711.1	XP_008177982.1	XP_008178022.1	XP_008177401.1	XP_008177907.1	XP_008177425.1	XP_008177243.1	XP_008177764.1	XP_008178053.1	XP_008177740.1	XP_008177533.1
OG0000056 XP_014450316.1	XP_014450317.1	XP_014462052.1	XP_014462639.1	XP_014450320.1	XP_014450319.1	XP_014450321.1	XP_014450318.1	XP_006260916.2 ENSACAP00000013503.3	ENSACAP00000015017.3	ENSACAP00000004739.3 XP_005307479.1	XP_005281985.1	XP_005281986.1	XP_005281983.1	XP_005281984.1	XP_005281989.1	XP_005281988.1	XP_005307488.1	XP_005281972.1	XP_005307485.1	XP_005307484.1	XP_005307483.1	XP_005307482.1	XP_005307481.1	XP_005307480.1	XP_005307489.1	XP_008177802.1	XP_008177801.1	XP_008166599.1	XP_008166598.1	XP_008171290.1	XP_005308832.1	XP_005307486.1	XP_005295769.1	XP_008177799.1	XP_008177798.1	XP_005281977.1	XP_008172267.1	XP_008177800.1	XP_005281980.1	XP_005281979.1	XP_005281978.1	XP_005281987.1	XP_005281976.1	XP_005281975.1	XP_005281974.1	XP_005281973.1	XP_005281982.1	XP_005281981.1 ENSGALP00000017395.4	ENSGALP00000037420.2
OG0000057 XP_014455773.1	XP_014462102.1	XP_014454460.1	XP_014466221.1	XP_014456032.1	XP_014452575.1 ENSACAP00000020537.1	ENSACAP00000017184.2	ENSACAP00000021850.1	ENSACAP00000019766.1	ENSACAP00000018658.1	ENSACAP00000018436.2	ENSACAP00000019389.1	ENSACAP00000019570.1	ENSACAP00000019424.1	ENSACAP00000016081.2	ENSACAP00000017941.2	ENSACAP00000018481.1	ENSACAP00000020608.1	ENSACAP00000020137.1 XP_008175887.1	XP_005307799.1	XP_008161535.1	XP_008169112.1	XP_008167172.1	XP_008175544.1	XP_008170510.1	XP_008170509.1	XP_005285554.2 ENSP00000386186.3	ENSP00000393854.1 ENSPSIP00000017276.1	ENSPSIP00000019018.1	ENSPSIP00000001816.1	ENSPSIP00000013805.1	ENSPSIP00000015678.1	ENSPSIP00000014533.1	ENSPSIP00000008697.1	ENSPSIP00000008693.1	ENSPSIP00000017856.1	ENSPSIP00000003318.1	ENSPSIP00000010223.1	ENSPSIP00000000400.1	ENSPSIP00000001782.1	ENSPSIP00000018719.1	ENSPSIP00000012090.1	ENSPSIP00000016290.1	ENSPSIP00000013354.1	ENSPSIP00000013362.1	ENSPSIP00000016093.1	ENSPSIP00000014495.1	ENSPSIP00000011613.1	ENSPSIP00000017924.1	ENSPSIP00000014755.1
OG0000058 XP_014451183.1	XP_006257904.2 XP_005289367.1 ENSP00000406507.1	ENSP00000389339.2	ENSP00000400167.1	ENSP00000401272.1	ENSP00000398927.2	ENSP00000413662.1	ENSP00000401376.1	ENSP00000413618.1	ENSP00000393547.1	ENSP00000391754.1	ENSP00000409855.1	ENSP00000414105.2	ENSP00000412339.1	ENSP00000402133.1	ENSP00000403829.2	ENSP00000211377.3	ENSP00000401276.1	ENSP00000391604.1	ENSP00000400711.1	ENSP00000406895.2	ENSP00000413983.1	ENSP00000405625.1	ENSP00000365057.2	ENSP00000365059.2	ENSP00000365071.1	ENSP00000365060.4	ENSP00000409349.1	ENSP00000395484.1	ENSP00000365065.4	ENSP00000395307.1	ENSP00000392933.1	ENSP00000400488.1	ENSP00000372928.4	ENSP00000416184.1	ENSP00000415884.1	ENSP00000416056.1	ENSP00000383005.1	ENSP00000382994.3	ENSP00000403719.1	ENSP00000407932.1	ENSP00000404929.1	ENSP00000404544.1	ENSP00000406761.1	ENSP00000413683.1	ENSP00000409320.1	ENSP00000413733.1	ENSP00000392449.1	ENSP00000398758.1	ENSP00000372926.2
OG0000059 XP_014454087.1	XP_014454086.1	XP_014454083.1	XP_014454082.1	XP_014454085.1	XP_014454084.1	XP_014453879.1	XP_014453878.1	XP_006274727.2	XP_014452347.1	XP_014461125.1	XP_014461124.1	XP_014461123.1	XP_006273628.2	XP_006273630.2	XP_014453877.1	XP_014452349.1	XP_014452350.1	XP_006278856.2	XP_006278855.2	XP_014459184.1 ENSACAP00000016584.2	ENSACAP00000021889.1	ENSACAP00000016454.3	ENSACAP00000018253.2	ENSACAP00000016582.2	ENSACAP00000021663.1	ENSACAP00000016456.2	ENSACAP00000016912.2	ENSACAP00000021302.2 XP_008174251.1	XP_008175299.1	XP_005315593.1 ENSGALP00000038576.2	ENSGALP00000038607.2	ENSGALP00000007830.4	ENSGALP00000030678.3	ENSGALP00000042952.1	ENSGALP00000009049.3 ENSP00000255945.2	ENSP00000419545.1	ENSP00000418615.1	ENSP00000223293.5	ENSP00000302833.5	ENSP00000487840.2	ENSP00000351473.3	ENSP00000479580.1	ENSP00000305107.3	ENSP00000477920.1	ENSP00000315474.4	ENSP00000330374.5 ENSPSIP00000017062.1	ENSPSIP00000000508.1	ENSPSIP00000014409.1	ENSPSIP00000005368.1
OG0000060 XP_014454846.1 ENSACAP00000017091.2 XP_008176590.1	XP_008176591.1	XP_008176592.1	XP_008176593.1	XP_008176594.1	XP_008176595.1	XP_008176560.1	XP_008176735.1	XP_005300531.1	XP_008176543.1	XP_008176542.1	XP_008176547.1	XP_008176546.1	XP_008176545.1	XP_008176544.1	XP_008176549.1	XP_008176548.1	XP_008176563.1	XP_008176562.1	XP_008176565.1	XP_008176564.1	XP_008176567.1	XP_008176566.1	XP_008176569.1	XP_008176568.1	XP_008176550.1	XP_008176551.1	XP_008176552.1	XP_008176553.1	XP_008176554.1	XP_008176578.1	XP_008176556.1	XP_008176557.1	XP_008176558.1	XP_008176559.1	XP_008176579.1	XP_008176574.1	XP_008176583.1	XP_008176582.1	XP_008176581.1	XP_008176580.1	XP_008176587.1	XP_008176586.1	XP_008176585.1	XP_008176584.1	XP_008176576.1	XP_008176589.1	XP_008176575.1	XP_008176572.1	XP_008176573.1
OG0000061 XP_014458130.1 ENSACAP00000018814.1	ENSACAP00000018392.1	ENSACAP00000019168.1	ENSACAP00000020295.1	ENSACAP00000019935.1	ENSACAP00000018488.1	ENSACAP00000018687.1	ENSACAP00000018627.1	ENSACAP00000020237.1	ENSACAP00000018016.1	ENSACAP00000020898.1	ENSACAP00000019173.1	ENSACAP00000020989.1	ENSACAP00000018919.1	ENSACAP00000019898.1	ENSACAP00000021418.1 XP_008168660.1	XP_005280916.1	XP_008168651.1	XP_008168659.1	XP_008168648.1	XP_008168649.1 ENSGALP00000042634.1	ENSGALP00000040493.2 ENSP00000367373.3	ENSP00000378129.3	ENSP00000434655.1	ENSP00000367363.3	ENSP00000436426.1	ENSP00000349344.5	ENSP00000436042.1	ENSP00000367362.3	ENSP00000434086.2	ENSP00000420840.2	ENSP00000386821.1	ENSP00000430584.2	ENSP00000367372.1	ENSP00000431748.1	ENSP00000421030.2	ENSP00000478748.1	ENSP00000304234.5	ENSP00000482503.1	ENSP00000381636.2	ENSP00000429808.2	ENSP00000435300.1	ENSP00000367365.4	ENSP00000481220.1	ENSP00000423470.2	ENSP00000433416.1	ENSP00000436557.1	ENSP00000484128.1	ENSP00000481404.1	ENSP00000433378.1
OG0000062 XP_006269202.1	XP_006273214.1	XP_006278798.1	XP_006274042.1	XP_006275176.2	XP_006277779.1	XP_006260900.1	XP_006260901.1	XP_014466124.1	XP_006269914.1 ENSACAP00000001688.1	ENSACAP00000001232.2	ENSACAP00000013677.1	ENSACAP00000022275.1	ENSACAP00000000779.2	ENSACAP00000000525.2	ENSACAP00000012230.1	ENSACAP00000001039.3	ENSACAP00000014970.2 XP_005289125.1	XP_005300031.1	XP_008172938.1	XP_005314164.1	XP_005292568.1	XP_005292567.1	XP_005291284.1	XP_005300032.1	XP_005304619.1	XP_005304620.1	XP_008168796.1 ENSGALP00000039176.1	ENSGALP00000015988.3	ENSGALP00000018042.3	ENSGALP00000010239.3	ENSGALP00000015657.4	ENSGALP00000042680.1	ENSGALP00000023523.3 ENSP00000355645.3	ENSP00000461672.1	ENSP00000477968.1	ENSP00000402373.1	ENSP00000458162.1	ENSP00000224784.6	ENSP00000459124.1	ENSP00000331514.2	ENSP00000458435.1	ENSP00000290378.4	ENSP00000349960.4	ENSP00000386857.1	ENSP00000295137.3	ENSP00000386929.3	ENSP00000416706.1 ENSPSIP00000001499.1	ENSPSIP00000006014.1	ENSPSIP00000008215.1
OG0000063 XP_006264321.1	XP_006264320.1	XP_006264323.1	XP_006264322.1 XP_005294394.1	XP_005294395.1	XP_008175615.1	XP_008175614.1	XP_005294393.1	XP_005294392.1	XP_008172928.1	XP_008172927.1	XP_008172926.1 ENSGALP00000039846.2	ENSGALP00000001402.3	ENSGALP00000039848.1 ENSP00000478376.1	ENSP00000488439.1	ENSP00000487911.1	ENSP00000487715.1	ENSP00000488736.1	ENSP00000479126.1	ENSP00000488231.1	ENSP00000478708.1	ENSP00000487859.1	ENSP00000487961.1	ENSP00000488712.1	ENSP00000487845.1	ENSP00000488758.1	ENSP00000484704.1	ENSP00000482862.2	ENSP00000488541.1	ENSP00000488366.1	ENSP00000482259.1	ENSP00000480051.1	ENSP00000484322.1	ENSP00000483609.1	ENSP00000483330.1	ENSP00000484498.1	ENSP00000479354.1	ENSP00000484921.2	ENSP00000479894.1	ENSP00000481023.1	ENSP00000482487.1	ENSP00000480558.1	ENSP00000483712.1	ENSP00000477908.1	ENSP00000483206.1	ENSP00000474412.1	ENSP00000480753.1	ENSP00000479774.1	ENSP00000481969.1	ENSP00000478181.1
OG0000064 XP_014456319.1	XP_014456323.1	XP_014456330.1 ENSACAP00000001792.2	ENSACAP00000023103.1 XP_008163322.1	XP_008163323.1	XP_005291162.1	XP_005291165.1 ENSGALP00000025937.4 ENSP00000436507.1	ENSP00000434070.1	ENSP00000488672.1	ENSP00000477608.1	ENSP00000435117.1	ENSP00000435015.1	ENSP00000479653.1	ENSP00000480505.1	ENSP00000478271.1	ENSP00000483527.1	ENSP00000434872.1	ENSP00000436045.1	ENSP00000432429.1	ENSP00000435697.1	ENSP00000391944.2	ENSP00000431763.1	ENSP00000432881.1	ENSP00000378551.3	ENSP00000437276.1	ENSP00000433611.1	ENSP00000388261.2	ENSP00000410059.2	ENSP00000484536.1	ENSP00000487777.1	ENSP00000436542.1	ENSP00000434691.1	ENSP00000431460.1	ENSP00000436933.1	ENSP00000433412.1	ENSP00000434448.1	ENSP00000431833.1	ENSP00000431933.1	ENSP00000431742.1	ENSP00000488733.1	ENSP00000488549.1	ENSP00000488411.1	ENSP00000488200.1	ENSP00000487713.1	ENSP00000488535.1	ENSP00000488298.1	ENSP00000434389.1	ENSP00000432221.1	ENSP00000434123.1	ENSP00000437117.1
OG0000065 XP_014461672.1	XP_014464370.1	XP_006266321.1	XP_006260525.2	XP_006260522.2	XP_006260521.2	XP_014463804.1	XP_006260524.2	XP_006260523.2 ENSACAP00000004479.3	ENSACAP00000005526.2	ENSACAP00000016274.3	ENSACAP00000014976.3 XP_008165644.1	XP_005309709.1	XP_005309710.1	XP_005286095.1	XP_005286094.1	XP_008172799.1	XP_005286096.1	XP_008177167.1	XP_005309708.1	XP_005286098.1	XP_005283397.1	XP_005283398.1	XP_005283399.1	XP_005283400.1	XP_005314738.1	XP_005283401.1	XP_008172803.1	XP_008172800.1	XP_008172801.1	XP_008172806.1	XP_008172804.1	XP_008172805.1 ENSGALP00000008895.4	ENSGALP00000041659.1	ENSGALP00000014849.4	ENSGALP00000026789.4	ENSGALP00000041280.1	ENSGALP00000026790.4	ENSGALP00000042418.1	ENSGALP00000043141.1	ENSGALP00000042340.1	ENSGALP00000040855.1 ENSP00000445298.1	ENSP00000363163.3	ENSP00000370483.3	ENSP00000439203.2	ENSP00000275857.6	ENSP00000370482.1	ENSP00000342535.5	ENSP00000372320.1	ENSP00000351591.3
OG0000066 XP_006268100.1	XP_006268897.1	XP_006268909.2	XP_006269554.2	XP_006269556.1 ENSACAP00000004275.1	ENSACAP00000004566.2	ENSACAP00000015041.2	ENSACAP00000019009.1	ENSACAP00000019109.1	ENSACAP00000015204.1	ENSACAP00000017912.2	ENSACAP00000015206.1 XP_005308996.1	XP_008172416.1	XP_008175324.1	XP_005308998.1	XP_005285084.1	XP_005315409.1	XP_005313480.1	XP_005313473.1	XP_008176482.1 ENSGALP00000041526.1 ENSP00000489567.1	ENSP00000366956.1	ENSP00000489319.1	ENSP00000350767.3	ENSP00000443017.1	ENSP00000479106.1	ENSP00000479794.1	ENSP00000367034.2	ENSP00000366974.2	ENSP00000484789.1	ENSP00000489236.1	ENSP00000481486.1	ENSP00000479461.1	ENSP00000462667.1	ENSP00000347168.1	ENSP00000481343.1	ENSP00000480960.1	ENSP00000481507.1	ENSP00000482412.1	ENSP00000478786.1	ENSP00000244537.5	ENSP00000462355.1	ENSP00000478519.1 ENSPSIP00000001491.1	ENSPSIP00000000546.1	ENSPSIP00000001601.1	ENSPSIP00000001542.1	ENSPSIP00000001575.1	ENSPSIP00000001420.1	ENSPSIP00000001587.1	ENSPSIP00000000578.1	ENSPSIP00000001503.1
OG0000067 XP_006270526.2	XP_006270497.1 XP_005314746.1	XP_005313810.2	XP_008174192.1	XP_005315033.2	XP_008175759.1	XP_005312830.1	XP_008174866.1	XP_005284294.1	XP_005312051.1	XP_005312044.1	XP_008174862.1	XP_008174861.1	XP_008175606.1	XP_008175468.1	XP_008175584.1	XP_008175643.1	XP_008176389.1	XP_005312042.1	XP_005312041.1	XP_005312040.1 ENSP00000216341.4	ENSP00000387385.3	ENSP00000479643.1	ENSP00000371980.1	ENSP00000216336.2	ENSP00000371982.2	ENSP00000216338.4 ENSPSIP00000018319.1	ENSPSIP00000018342.1	ENSPSIP00000007745.1	ENSPSIP00000009050.1	ENSPSIP00000007112.1	ENSPSIP00000009900.1	ENSPSIP00000004135.1	ENSPSIP00000004014.1	ENSPSIP00000009048.1	ENSPSIP00000004141.1	ENSPSIP00000002501.1	ENSPSIP00000010154.1	ENSPSIP00000010582.1	ENSPSIP00000009986.1	ENSPSIP00000018631.1	ENSPSIP00000008951.1	ENSPSIP00000018484.1	ENSPSIP00000007563.1	ENSPSIP00000012365.1	ENSPSIP00000018922.1	ENSPSIP00000009527.1	ENSPSIP00000003668.1	ENSPSIP00000009009.1	ENSPSIP00000004153.1
OG0000068 XP_014460678.1	XP_014465612.1	XP_006260012.1	XP_014460677.1	XP_014451108.1 ENSACAP00000018450.1	ENSACAP00000010919.2	ENSACAP00000010933.3	ENSACAP00000007820.2	ENSACAP00000023363.1	ENSACAP00000007794.2	ENSACAP00000007853.2	ENSACAP00000018914.2	ENSACAP00000010911.2	ENSACAP00000020065.1	ENSACAP00000000439.3	ENSACAP00000000508.2	ENSACAP00000019341.1	ENSACAP00000011084.2	ENSACAP00000022537.1	ENSACAP00000021131.2	ENSACAP00000007754.2	ENSACAP00000022247.1	ENSACAP00000022612.1	ENSACAP00000010945.2	ENSACAP00000021966.1	ENSACAP00000021756.1	ENSACAP00000023278.1	ENSACAP00000007746.2	ENSACAP00000010931.2	ENSACAP00000007803.3	ENSACAP00000020228.1	ENSACAP00000020868.1	ENSACAP00000023394.1 XP_008175386.1	XP_008175342.1	XP_005313293.1	XP_005313294.1	XP_005313292.1	XP_005313296.2	XP_005313261.2	XP_005314897.1	XP_005314786.1	XP_008172379.1	XP_008172378.1 ENSGALP00000004618.4 ENSP00000303206.3	ENSP00000346158.1	ENSP00000387410.1	ENSP00000358409.4	ENSP00000256585.5	ENSP00000437135.1	ENSP00000304311.2	ENSP00000377456.1
OG0000069 XP_006266326.2	XP_006266332.1	XP_014451934.1	XP_014451932.1	XP_006276000.1	XP_006266327.1	XP_006266328.1	XP_006266331.2	XP_014451878.1	XP_006275998.2 ENSACAP00000004090.3	ENSACAP00000019690.2	ENSACAP00000004094.2	ENSACAP00000023020.1	ENSACAP00000021439.1	ENSACAP00000005240.2 XP_005307561.1	XP_008163998.1	XP_008163982.1	XP_005307553.1	XP_008163983.1	XP_008163980.1	XP_008163981.1 ENSGALP00000017841.4	ENSGALP00000017850.3	ENSGALP00000036785.1	ENSGALP00000017843.4	ENSGALP00000017845.4 ENSP00000450561.1	ENSP00000452169.1	ENSP00000390299.1	ENSP00000451525.1	ENSP00000376803.4	ENSP00000385960.4	ENSP00000416354.3	ENSP00000386094.1	ENSP00000452476.1	ENSP00000376793.3	ENSP00000486067.1	ENSP00000376795.4	ENSP00000450540.1	ENSP00000452246.3	ENSP00000486654.1	ENSP00000485908.1	ENSP00000479923.1	ENSP00000477615.1	ENSP00000480231.1	ENSP00000376802.4	ENSP00000486302.1	ENSP00000487579.1	ENSP00000452452.1	ENSP00000416066.1	ENSP00000408474.1	ENSP00000486935.1
OG0000070 XP_014452116.1	XP_014452114.1	XP_014452115.1	XP_006276585.1	XP_014459529.1	XP_006274753.1 ENSACAP00000020535.1	ENSACAP00000006921.3	ENSACAP00000019421.2	ENSACAP00000007788.2	ENSACAP00000018899.2	ENSACAP00000006817.3	ENSACAP00000022938.1	ENSACAP00000006819.2 XP_008175473.1	XP_008160975.1	XP_008160974.1	XP_008160976.1	XP_005283691.1 ENSP00000488437.1	ENSP00000478237.1	ENSP00000488338.1	ENSP00000488077.1	ENSP00000460351.1	ENSP00000457750.1	ENSP00000482743.1	ENSP00000478695.1	ENSP00000445930.1	ENSP00000440783.1	ENSP00000309148.1	ENSP00000366047.2	ENSP00000340889.4	ENSP00000470482.1	ENSP00000489576.1	ENSP00000489190.1	ENSP00000334079.3	ENSP00000161006.3	ENSP00000489315.1	ENSP00000417854.1	ENSP00000484461.1	ENSP00000264691.4	ENSP00000456821.1	ENSP00000418247.2	ENSP00000343577.3	ENSP00000234798.4	ENSP00000469417.1	ENSP00000458506.1	ENSP00000489492.1	ENSP00000489375.1	ENSP00000384225.2	ENSP00000250366.5	ENSP00000471395.1	ENSP00000306390.3
OG0000071 XP_014463917.1	XP_014457366.1 ENSACAP00000004908.2 XP_008162178.1	XP_008162179.1	XP_008162172.1	XP_008162173.1	XP_008162170.1	XP_008162171.1	XP_008162176.1	XP_008162177.1	XP_008162174.1	XP_008162175.1	XP_005297472.1	XP_008162983.1	XP_008162982.1	XP_008162981.1	XP_008162169.1	XP_008162167.1	XP_008162166.1	XP_008162168.1	XP_008162184.1	XP_008162182.1	XP_008162183.1	XP_008162180.1	XP_008162181.1 ENSGALP00000008367.4	ENSGALP00000012318.4 ENSP00000427247.1	ENSP00000420918.1	ENSP00000426261.1	ENSP00000425451.1	ENSP00000392390.4	ENSP00000425522.1	ENSP00000427238.1	ENSP00000423112.2	ENSP00000422407.1	ENSP00000426814.1	ENSP00000423155.1	ENSP00000414388.2	ENSP00000421518.1	ENSP00000424664.1	ENSP00000422268.1	ENSP00000426558.1	ENSP00000351401.4	ENSP00000423317.1	ENSP00000426232.1	ENSP00000427173.1	ENSP00000427231.1	ENSP00000425698.1	ENSP00000426098.1	ENSP00000425153.1	ENSP00000426313.1	ENSP00000423045.1
OG0000072 XP_014464727.1	XP_014449709.1	XP_014464728.1 ENSACAP00000017065.3 XP_008160858.1	XP_008160852.1	XP_008160853.1	XP_008160850.1	XP_008160851.1	XP_008160856.1	XP_008160857.1	XP_008160854.1	XP_008160855.1	XP_008160849.1	XP_008160845.1	XP_008160844.1	XP_008160847.1	XP_008160846.1	XP_008160843.1	XP_008160860.1 ENSGALP00000000885.3 ENSP00000483784.1	ENSP00000488245.1	ENSP00000482244.1	ENSP00000479142.1	ENSP00000460965.1	ENSP00000389250.3	ENSP00000262410.5	ENSP00000303214.7	ENSP00000340820.5	ENSP00000443028.1	ENSP00000340438.5	ENSP00000478602.1	ENSP00000483396.1	ENSP00000376031.1	ENSP00000376032.1	ENSP00000484491.1	ENSP00000484321.1	ENSP00000488081.1	ENSP00000487819.1	ENSP00000488373.1	ENSP00000488046.1	ENSP00000487403.1	ENSP00000481769.1	ENSP00000488101.1	ENSP00000487570.1	ENSP00000486039.1	ENSP00000477703.1	ENSP00000485913.1	ENSP00000458742.1	ENSP00000410838.2	ENSP00000413056.2	ENSP00000408975.3	ENSP00000334886.8
OG0000073 XP_014456170.1	XP_014452015.1	XP_006275586.1	XP_014461085.1 ENSACAP00000018544.1 XP_005313677.1	XP_008173725.1	XP_005315121.1	XP_008176412.1	XP_008176221.1	XP_008176226.1	XP_008176363.1	XP_008174422.1	XP_008176284.1	XP_005279424.1	XP_005279425.1	XP_008176308.1	XP_008176261.1	XP_008176068.1	XP_008176069.1	XP_005314952.2	XP_008160968.1	XP_005315183.1	XP_005315053.2	XP_005315297.1	XP_005315438.1	XP_008175939.1	XP_008176296.1	XP_008176409.1	XP_008176071.1	XP_008176070.1	XP_005315361.1	XP_008160969.1	XP_008175833.1	XP_008176357.1 ENSP00000396918.1	ENSP00000336872.6	ENSP00000384955.3	ENSP00000392136.1	ENSP00000412599.2	ENSP00000389990.1	ENSP00000392963.1 ENSPSIP00000005844.1	ENSPSIP00000013566.1	ENSPSIP00000015881.1	ENSPSIP00000000272.1	ENSPSIP00000013628.1	ENSPSIP00000000278.1	ENSPSIP00000014374.1	ENSPSIP00000013464.1 gopAga1_00017705-RA	gopAga1_00016050-RB	gopAga1_00016050-RA	gopAga1_00012864-RA	gopAga1_00012859-RA
OG0000074 XP_006277643.1	XP_014461745.1	XP_014460701.1	XP_014461747.1	XP_014461746.1	XP_006269515.2	XP_014466081.1	XP_014460700.1	XP_014466083.1	XP_014460698.1	XP_014460699.1	XP_014466082.1	XP_006265644.1	XP_014461748.1	XP_006265640.1	XP_006265642.1	XP_006265641.1	XP_014461750.1	XP_006265643.1	XP_006265639.1 ENSACAP00000015303.3	ENSACAP00000007069.2 XP_008173652.1	XP_005293490.1	XP_005293489.1	XP_005279638.1	XP_005279634.1	XP_005279630.1	XP_005279631.1	XP_008167464.1	XP_008173653.1	XP_008173650.1	XP_008167468.1	XP_005279633.1	XP_005313097.1 ENSGALP00000005001.4	ENSGALP00000043386.1	ENSGALP00000007737.4 ENSP00000486525.1	ENSP00000420045.1	ENSP00000489096.1	ENSP00000345680.7	ENSP00000386192.3	ENSP00000362014.3	ENSP00000419225.1	ENSP00000347457.5	ENSP00000347890.6	ENSP00000373905.3	ENSP00000352721.6	ENSP00000468734.1	ENSP00000377219.3	ENSP00000487310.1	ENSP00000486437.1	ENSP00000429701.1
OG0000075 XP_006269030.2	XP_014459934.1	XP_014459935.1 XP_008174851.1 ENSGALP00000041475.1 ENSP00000372850.3	ENSP00000416938.1	ENSP00000418923.1	ENSP00000449345.2	ENSP00000446728.1	ENSP00000480739.1	ENSP00000482072.1	ENSP00000372858.2	ENSP00000408250.1	ENSP00000447458.2	ENSP00000372853.4	ENSP00000387374.1	ENSP00000407961.2	ENSP00000395426.1	ENSP00000481651.1	ENSP00000482188.1	ENSP00000417790.1	ENSP00000419048.1	ENSP00000392322.2	ENSP00000391508.1	ENSP00000402278.2	ENSP00000400362.1	ENSP00000404452.1	ENSP00000411298.1	ENSP00000411376.1	ENSP00000413482.1	ENSP00000416484.1	ENSP00000364660.4	ENSP00000448602.2	ENSP00000483004.1	ENSP00000413995.1	ENSP00000450387.1	ENSP00000483231.1	ENSP00000417482.1	ENSP00000392835.2	ENSP00000449286.1	ENSP00000482616.1	ENSP00000446639.1	ENSP00000478351.1	ENSP00000449366.2	ENSP00000447134.1	ENSP00000413295.1	ENSP00000449823.2	ENSP00000450180.2	ENSP00000449940.1	ENSP00000299367.5	ENSP00000395683.2	ENSP00000406190.2
OG0000076 XP_006275767.1	XP_006275766.2	XP_006275746.1	XP_006275747.1	XP_014462402.1	XP_014462401.1	XP_006275748.1	XP_014462399.1	XP_006278702.1	XP_006278703.1	XP_006275749.1	XP_014462400.1 ENSACAP00000007534.2	ENSACAP00000007770.2	ENSACAP00000011488.3	ENSACAP00000022705.1	ENSACAP00000022129.1	ENSACAP00000008205.3	ENSACAP00000018506.1 XP_008167739.1	XP_005291934.1	XP_005291937.1	XP_005291936.1	XP_008167792.1	XP_008167744.1	XP_008167742.1	XP_008167743.1	XP_008167740.1	XP_008167741.1	XP_005291931.1 ENSGALP00000003694.4	ENSGALP00000003695.3	ENSGALP00000016631.3	ENSGALP00000041153.1	ENSGALP00000016632.4	ENSGALP00000028845.3 ENSP00000252245.5	ENSP00000267119.5	ENSP00000369317.3	ENSP00000293745.2	ENSP00000252252.3	ENSP00000448220.1	ENSP00000441160.2	ENSP00000328358.5	ENSP00000307014.3	ENSP00000252242.4	ENSP00000449404.1	ENSP00000447402.1	ENSP00000293308.6	ENSP00000447566.1	ENSP00000252250.6	ENSP00000329243.5 ENSPSIP00000003567.1	ENSPSIP00000003849.1	ENSPSIP00000004067.1
OG0000077 XP_014450064.1 XP_005312977.1	XP_008176085.1	XP_005314011.1	XP_005314627.2	XP_005311643.2 ENSP00000394421.1	ENSP00000393011.1	ENSP00000405923.1	ENSP00000391879.1	ENSP00000410446.2	ENSP00000390908.1	ENSP00000379806.1	ENSP00000405526.1	ENSP00000412165.1	ENSP00000395491.1	ENSP00000393827.1	ENSP00000415755.2	ENSP00000389203.2	ENSP00000400655.2	ENSP00000415328.1	ENSP00000391602.1	ENSP00000412838.1	ENSP00000414248.1	ENSP00000416664.1	ENSP00000403395.1	ENSP00000407035.1	ENSP00000398545.1	ENSP00000395820.1	ENSP00000396188.1	ENSP00000407294.2	ENSP00000403887.1	ENSP00000405791.1	ENSP00000373102.2	ENSP00000331131.5	ENSP00000388005.1	ENSP00000391031.1	ENSP00000396089.1	ENSP00000413673.1	ENSP00000387530.1	ENSP00000400920.1	ENSP00000416737.1	ENSP00000394371.1	ENSP00000416276.1	ENSP00000407876.1	ENSP00000402684.1	ENSP00000402990.1	ENSP00000406707.1	ENSP00000397048.1	ENSP00000402395.1	ENSP00000408233.2	ENSP00000390258.1
OG0000078 XP_014466401.1	XP_014455778.1	XP_014452012.1	XP_014466394.1	XP_014450772.1 ENSACAP00000021778.1	ENSACAP00000022399.1	ENSACAP00000023223.1	ENSACAP00000021960.1	ENSACAP00000022560.1 XP_005313771.2	XP_008163916.1 ENSPSIP00000008061.1	ENSPSIP00000004949.1	ENSPSIP00000015201.1	ENSPSIP00000004484.1	ENSPSIP00000007898.1	ENSPSIP00000003457.1	ENSPSIP00000013278.1	ENSPSIP00000013493.1	ENSPSIP00000013612.1	ENSPSIP00000018334.1	ENSPSIP00000002220.1	ENSPSIP00000000831.1	ENSPSIP00000002560.1	ENSPSIP00000001101.1	ENSPSIP00000008601.1	ENSPSIP00000000319.1	ENSPSIP00000020496.1	ENSPSIP00000008497.1	ENSPSIP00000005601.1	ENSPSIP00000008303.1	ENSPSIP00000012507.1	ENSPSIP00000000432.1	ENSPSIP00000015303.1	ENSPSIP00000000955.1	ENSPSIP00000018984.1	ENSPSIP00000008514.1	ENSPSIP00000002891.1	ENSPSIP00000012430.1	ENSPSIP00000003372.1	ENSPSIP00000019045.1	ENSPSIP00000009662.1	ENSPSIP00000001131.1	ENSPSIP00000010838.1	ENSPSIP00000000906.1	ENSPSIP00000011881.1	ENSPSIP00000001888.1 gopAga1_00008659-RA	gopAga1_00000348-RA	gopAga1_00003064-RA	gopAga1_00006506-RA	gopAga1_00010698-RA	gopAga1_00001122-RA
OG0000079 ENSACAP00000019276.1	ENSACAP00000020318.1	ENSACAP00000023480.1	ENSACAP00000002726.2 XP_008171585.1	XP_008174812.1	XP_008174811.1	XP_008174810.1	XP_008175930.1	XP_008176074.1	XP_008175931.1	XP_008176335.1 ENSP00000450505.1	ENSP00000440087.1	ENSP00000488621.1	ENSP00000452011.1	ENSP00000450448.1	ENSP00000374890.3	ENSP00000443059.1	ENSP00000483504.1	ENSP00000438480.1	ENSP00000439323.1	ENSP00000488551.1	ENSP00000444955.1	ENSP00000452332.1	ENSP00000452111.1	ENSP00000484940.1	ENSP00000479210.1	ENSP00000482333.1	ENSP00000487913.1	ENSP00000451359.1	ENSP00000452585.1	ENSP00000450950.1	ENSP00000438446.1	ENSP00000445942.1	ENSP00000488521.1	ENSP00000446015.1	ENSP00000452148.1	ENSP00000451574.1 ENSPSIP00000005094.1	ENSPSIP00000004948.1	ENSPSIP00000007025.1	ENSPSIP00000004979.1	ENSPSIP00000004899.1	ENSPSIP00000004930.1	ENSPSIP00000005077.1 gopAga1_00013582-RA	gopAga1_00018966-RA	gopAga1_00018558-RA	gopAga1_00018560-RA	gopAga1_00018559-RA	gopAga1_00017215-RA	gopAga1_00017219-RA	gopAga1_00019982-RA
OG0000080 XP_014466340.1	XP_014466341.1	XP_006261248.1	XP_006258441.1	XP_006270573.1	XP_006261249.1 ENSACAP00000009228.2	ENSACAP00000017039.2	ENSACAP00000007165.3	ENSACAP00000023256.1	ENSACAP00000008053.3	ENSACAP00000007686.2	ENSACAP00000017046.2 XP_008162032.1	XP_008162031.1	XP_005290191.1	XP_005290189.1	XP_005305194.1	XP_008163413.1	XP_005295476.1	XP_008166364.1	XP_008166365.1	XP_005283657.1 ENSGALP00000039087.2	ENSGALP00000036100.2	ENSGALP00000001425.2	ENSGALP00000001418.3	ENSGALP00000001182.4	ENSGALP00000012485.4	ENSGALP00000042123.1	ENSGALP00000022340.4	ENSGALP00000041897.1	ENSGALP00000039921.2	ENSGALP00000043474.1	ENSGALP00000001422.4 ENSP00000384330.2	ENSP00000483640.1	ENSP00000255381.2	ENSP00000348634.3	ENSP00000386041.3	ENSP00000464317.1	ENSP00000380367.2	ENSP00000245503.5	ENSP00000480864.1	ENSP00000262873.7	ENSP00000404570.3	ENSP00000252172.4	ENSP00000347507.3	ENSP00000226207.5 ENSPSIP00000016232.1	ENSPSIP00000018776.1	ENSPSIP00000009151.1	ENSPSIP00000008250.1	ENSPSIP00000003773.1	ENSPSIP00000011941.1 gopAga1_00018245-RA
OG0000081 XP_014465617.1	XP_014452896.1	XP_014465630.1	XP_014465636.1	XP_014459990.1	XP_014461917.1	XP_014461916.1	XP_014461915.1	XP_006277751.1	XP_006277752.1	XP_014465625.1	XP_014465643.1 ENSACAP00000003081.3	ENSACAP00000005817.2	ENSACAP00000008592.3	ENSACAP00000002976.3	ENSACAP00000000363.3 XP_005285231.1	XP_008167989.1	XP_008167988.1	XP_008167987.1	XP_005299712.1	XP_005299710.1	XP_008168302.1	XP_008172677.1	XP_008168300.1	XP_005299714.1	XP_008167992.1	XP_008167990.1	XP_008167991.1	XP_008168299.1	XP_008168298.1	XP_008168293.1	XP_008168295.1	XP_008168294.1	XP_008168297.1	XP_008168296.1	XP_008168301.1 ENSGALP00000000320.4	ENSGALP00000028428.3	ENSGALP00000017011.4 ENSP00000370022.4	ENSP00000477023.1	ENSP00000345030.5	ENSP00000405003.3	ENSP00000370029.4	ENSP00000322898.6	ENSP00000357637.3	ENSP00000347463.4	ENSP00000428020.1	ENSP00000477809.1	ENSP00000437909.1	ENSP00000386178.3	ENSP00000430241.1
OG0000082 XP_014451090.1	XP_014451089.1	XP_014451088.1	XP_014451058.1	XP_014451093.1	XP_014451092.1	XP_014451091.1	XP_014451055.1	XP_014451056.1	XP_014451057.1 ENSACAP00000007384.2	ENSACAP00000010329.3	ENSACAP00000006164.2	ENSACAP00000000821.3	ENSACAP00000011033.3	ENSACAP00000008679.3 XP_005314294.1	XP_005314293.1	XP_005314292.1	XP_005310947.1	XP_005290003.1	XP_005290002.1	XP_005290004.1	XP_005290001.1 ENSGALP00000042065.1	ENSGALP00000008191.4	ENSGALP00000008193.4 ENSP00000458678.1	ENSP00000457547.1	ENSP00000487767.1	ENSP00000353720.3	ENSP00000355193.4	ENSP00000455959.1	ENSP00000390492.2	ENSP00000394452.1	ENSP00000317842.4	ENSP00000459314.1	ENSP00000377602.1	ENSP00000461336.1	ENSP00000461519.1	ENSP00000460799.1	ENSP00000304782.4	ENSP00000460847.1	ENSP00000428571.1	ENSP00000464620.1	ENSP00000428864.1	ENSP00000458586.1	ENSP00000460045.1	ENSP00000458773.1	ENSP00000461208.1	ENSP00000428887.1	ENSP00000290567.9	ENSP00000324271.9	ENSP00000458664.2 ENSPSIP00000017545.1
OG0000083 XP_014454091.1	XP_014453350.1 ENSACAP00000018069.1	ENSACAP00000007554.2	ENSACAP00000021173.1	ENSACAP00000020184.2 XP_008175899.1	XP_008176028.1	XP_005313209.1	XP_005314181.2	XP_005311640.1	XP_008175711.1	XP_005314165.1	XP_005315396.1	XP_008160979.1	XP_005313693.1	XP_005295101.1	XP_008176164.1	XP_005314555.1	XP_008175152.1	XP_008175894.1	XP_008175150.1	XP_008175151.1	XP_005314617.1	XP_008175702.1	XP_008176150.1	XP_008176151.1	XP_008175976.1	XP_005315334.1	XP_008173900.1	XP_005314688.1 ENSGALP00000040506.2	ENSGALP00000041355.1	ENSGALP00000041718.1	ENSGALP00000043235.1	ENSGALP00000040809.1 ENSP00000398020.1	ENSP00000398968.1	ENSP00000414955.1	ENSP00000332439.3	ENSP00000300747.5	ENSP00000434681.1	ENSP00000361595.2	ENSP00000473574.1	ENSP00000473360.1	ENSP00000361592.3	ENSP00000434053.1	ENSP00000396425.1	ENSP00000401490.1	ENSP00000400058.1	ENSP00000407693.1 ENSPSIP00000011256.1	ENSPSIP00000006771.1	ENSPSIP00000020047.1	ENSPSIP00000008789.1
OG0000084 XP_014452027.1	XP_006258345.1 ENSACAP00000019355.1	ENSACAP00000000023.2	ENSACAP00000005842.2 XP_008177815.1	XP_008177814.1	XP_005288046.1	XP_008162449.1	XP_005288050.1	XP_005288044.1	XP_005288041.1	XP_005288042.1	XP_005288043.1	XP_005288048.1	XP_005288049.1	XP_005288038.1	XP_005288037.1	XP_005288036.1	XP_005288035.1	XP_005288045.1	XP_005288040.1	XP_005288039.1 ENSGALP00000021182.4	ENSGALP00000008691.4 ENSP00000489361.1	ENSP00000488936.1	ENSP00000489460.1	ENSP00000483127.1	ENSP00000489059.1	ENSP00000489077.1	ENSP00000489265.1	ENSP00000489064.1	ENSP00000479523.1	ENSP00000467339.1	ENSP00000489593.1	ENSP00000380386.3	ENSP00000468263.1	ENSP00000489120.1	ENSP00000442739.2	ENSP00000489414.1	ENSP00000489348.1	ENSP00000489206.1	ENSP00000347621.5	ENSP00000340054.6	ENSP00000464959.1	ENSP00000489084.1	ENSP00000445336.2	ENSP00000410064.2	ENSP00000467476.1	ENSP00000442976.1	ENSP00000354158.3	ENSP00000489601.1	ENSP00000288221.6
OG0000085 XP_006269762.1	XP_006278793.1	XP_014458904.1	XP_006263915.1	XP_006263913.1 ENSACAP00000001175.2	ENSACAP00000011946.3	ENSACAP00000015619.2 XP_005303494.1	XP_005289489.1	XP_005284130.1	XP_005284133.1	XP_005284132.1	XP_005286557.1	XP_005303496.1	XP_005303495.1	XP_005303498.1	XP_005303497.1	XP_005303492.1	XP_005284135.1	XP_005284129.1 ENSGALP00000036539.2	ENSGALP00000036540.1	ENSGALP00000003327.4	ENSGALP00000012413.3 ENSP00000329686.4	ENSP00000366577.4	ENSP00000375071.5	ENSP00000395323.1	ENSP00000414886.1	ENSP00000431102.1	ENSP00000399080.2	ENSP00000371585.4	ENSP00000478151.1	ENSP00000295225.5	ENSP00000417499.1	ENSP00000420040.1	ENSP00000344169.4	ENSP00000341624.3	ENSP00000349055.2	ENSP00000359063.1	ENSP00000239118.6	ENSP00000350733.3	ENSP00000423257.1	ENSP00000371583.3	ENSP00000371587.2	ENSP00000351892.5	ENSP00000354261.4 ENSPSIP00000010819.1	ENSPSIP00000011556.1	ENSPSIP00000011546.1	ENSPSIP00000016198.1	ENSPSIP00000016193.1	ENSPSIP00000009502.1 gopAga1_00009008-RA	gopAga1_00008824-RA
OG0000086 XP_014449402.1	XP_006272682.2	XP_006271019.1	XP_006272171.1	XP_014450620.1	XP_014456118.1	XP_006258240.1	XP_006272173.1 ENSACAP00000017613.2	ENSACAP00000008396.2	ENSACAP00000001582.2 XP_005289320.1	XP_005291248.1	XP_008164878.1	XP_005278978.1	XP_005290277.1	XP_005290276.1	XP_008164882.1	XP_008164880.1	XP_008164881.1	XP_008172206.1	XP_008164879.1	XP_005290275.1 ENSGALP00000043053.1	ENSGALP00000040893.1	ENSGALP00000017875.2	ENSGALP00000042788.1 ENSP00000482192.1	ENSP00000375727.2	ENSP00000398629.1	ENSP00000355556.1	ENSP00000355557.4	ENSP00000484021.1	ENSP00000300873.3	ENSP00000294117.5	ENSP00000489307.1	ENSP00000371594.2	ENSP00000489194.1	ENSP00000489228.1	ENSP00000489027.1	ENSP00000489454.1	ENSP00000451576.1	ENSP00000360021.3	ENSP00000451279.1	ENSP00000450758.1	ENSP00000451102.1	ENSP00000334448.4	ENSP00000452014.1	ENSP00000451231.1 ENSPSIP00000006359.1	ENSPSIP00000010833.1	ENSPSIP00000015074.1 gopAga1_00011007-RA	gopAga1_00005978-RA	gopAga1_00010338-RB	gopAga1_00017344-RB
OG0000087 XP_014449454.1	XP_014449455.1	XP_014449453.1	XP_006258508.1	XP_006258509.1	XP_006258510.2	XP_006258511.2	XP_014449456.1 ENSACAP00000008907.3 XP_008164251.1	XP_005296914.1	XP_005296909.1	XP_005296910.1	XP_005296900.1	XP_005296901.1	XP_005296902.1	XP_005296903.1	XP_005296904.1	XP_005296905.1	XP_005296906.1	XP_005296907.1	XP_005296915.1	XP_005296912.1	XP_005296911.1	XP_005296913.1	XP_005296899.1	XP_005296897.1	XP_005296896.1	XP_005296895.1	XP_005296894.1 ENSP00000441562.2	ENSP00000455179.1	ENSP00000439827.2	ENSP00000454366.1	ENSP00000455418.2	ENSP00000457765.1	ENSP00000455261.1	ENSP00000456125.1	ENSP00000455984.2	ENSP00000348374.4	ENSP00000478549.1	ENSP00000487218.1	ENSP00000381382.1	ENSP00000486072.1	ENSP00000454647.1	ENSP00000445202.1	ENSP00000439656.1	ENSP00000409447.2	ENSP00000455135.1	ENSP00000486670.1	ENSP00000346440.3	ENSP00000457649.1	ENSP00000455763.1
OG0000088 XP_006278043.1	XP_006259238.1	XP_006272729.2 ENSACAP00000013166.3	ENSACAP00000012163.3	ENSACAP00000013185.3	ENSACAP00000012187.3	ENSACAP00000017323.3	ENSACAP00000019422.2	ENSACAP00000013132.3	ENSACAP00000002467.3	ENSACAP00000015405.2 XP_005312967.1	XP_005312774.1	XP_005288087.1	XP_005288083.1	XP_005288085.1	XP_005288086.1	XP_005279761.1	XP_005279763.1	XP_005311898.2 ENSGALP00000039436.2	ENSGALP00000016978.3	ENSGALP00000018454.4	ENSGALP00000036691.1	ENSGALP00000037524.2	ENSGALP00000036688.2 ENSP00000301071.7	ENSP00000333326.3	ENSP00000318575.6	ENSP00000412646.1	ENSP00000446637.1	ENSP00000375938.2	ENSP00000439020.2	ENSP00000382982.3	ENSP00000248437.4	ENSP00000301072.6	ENSP00000482878.1	ENSP00000326042.6	ENSP00000318197.7	ENSP00000336799.5	ENSP00000443475.1 ENSPSIP00000016766.1	ENSPSIP00000016464.1	ENSPSIP00000013159.1	ENSPSIP00000003006.1	ENSPSIP00000003010.1	ENSPSIP00000003047.1	ENSPSIP00000003396.1	ENSPSIP00000006697.1 gopAga1_00008036-RA	gopAga1_00015908-RA	gopAga1_00015909-RA	gopAga1_00008035-RA	gopAga1_00014350-RA	gopAga1_00014351-RA
OG0000089 XP_006269987.1	XP_014452489.1	XP_014452487.1	XP_014452486.1	XP_014452485.1	XP_006269983.1	XP_014452483.1	XP_006269981.1	XP_006269984.1	XP_006269985.1	XP_006269986.1	XP_006269982.1	XP_014452484.1 ENSACAP00000009403.2	ENSACAP00000001011.3 XP_008177626.1	XP_008177627.1	XP_008177625.1	XP_005301134.1	XP_005287096.1	XP_005287095.1	XP_005287097.1	XP_008177630.1	XP_005287093.1	XP_005287094.1	XP_008177205.1	XP_008177204.1	XP_005287087.1	XP_005287088.1	XP_005287090.1	XP_005287091.1	XP_005287092.1 ENSGALP00000041131.1	ENSGALP00000042239.1	ENSGALP00000029558.3	ENSGALP00000041987.1	ENSGALP00000041818.1	ENSGALP00000041316.1	ENSGALP00000042620.1	ENSGALP00000043009.1 ENSP00000267287.7	ENSP00000432422.1	ENSP00000380726.1	ENSP00000344214.4	ENSP00000406014.1	ENSP00000402128.1	ENSP00000359881.1	ENSP00000359886.3	ENSP00000359876.3	ENSP00000359894.3	ENSP00000359890.3	ENSP00000365861.3	ENSP00000377848.2 ENSPSIP00000020105.1	ENSPSIP00000020102.1
OG0000090 XP_006261289.2	XP_006261288.1	XP_014449001.1	XP_014449000.1	XP_014449002.1	XP_014449004.1	XP_006268689.1	XP_014450883.1	XP_014449003.1 ENSACAP00000010176.3	ENSACAP00000012025.2	ENSACAP00000009653.3	ENSACAP00000010410.2	ENSACAP00000009397.3 XP_008167146.1	XP_008167087.1	XP_008163589.1	XP_008171981.1	XP_008171980.1	XP_008167051.1	XP_005279195.1	XP_005279194.1	XP_008171979.1	XP_008171978.1	XP_008174633.1	XP_008163592.1 ENSGALP00000007703.4	ENSGALP00000005686.4	ENSGALP00000037545.2	ENSGALP00000018350.4 ENSP00000356187.3	ENSP00000373311.4	ENSP00000350310.5	ENSP00000489171.1	ENSP00000353414.2	ENSP00000414854.1	ENSP00000343886.2	ENSP00000261173.2	ENSP00000424494.1	ENSP00000380267.1	ENSP00000359205.1	ENSP00000340930.2	ENSP00000324172.5	ENSP00000352054.3	ENSP00000392043.3	ENSP00000377425.1	ENSP00000352062.3	ENSP00000263519.4 ENSPSIP00000005390.1	ENSPSIP00000005402.1	ENSPSIP00000005970.1	ENSPSIP00000005958.1	ENSPSIP00000010767.1	ENSPSIP00000010772.1 gopAga1_00001499-RA	gopAga1_00014377-RA
OG0000091 XP_014456071.1	XP_014460597.1	XP_014456076.1	XP_014460599.1	XP_014453015.1	XP_006263594.1	XP_006263593.1	XP_014460600.1	XP_014460598.1	XP_014456087.1 ENSACAP00000016450.1	ENSACAP00000011352.1	ENSACAP00000011801.2 XP_005292097.1	XP_005292096.1	XP_005292095.1	XP_008163856.1	XP_008171280.1	XP_008171279.1	XP_005295922.1	XP_008171278.1	XP_005307369.1	XP_005292098.1	XP_005292099.1	XP_008164661.1 ENSGALP00000018075.3	ENSGALP00000009848.4	ENSGALP00000022313.3 ENSP00000378589.3	ENSP00000424154.1	ENSP00000378595.1	ENSP00000378974.4	ENSP00000363289.1	ENSP00000363291.4	ENSP00000363294.3	ENSP00000363297.3	ENSP00000352157.3	ENSP00000378586.3	ENSP00000378598.3	ENSP00000345524.6	ENSP00000394560.2	ENSP00000389338.1	ENSP00000377028.3	ENSP00000378590.3	ENSP00000414469.2	ENSP00000363304.1	ENSP00000355297.2 ENSPSIP00000005641.1	ENSPSIP00000017745.1	ENSPSIP00000017738.1	ENSPSIP00000005643.1	ENSPSIP00000018095.1	ENSPSIP00000018100.1 gopAga1_00004833-RA	gopAga1_00006503-RA	gopAga1_00006503-RB
OG0000092 XP_014451596.1	XP_006271623.1	XP_006276712.1	XP_006276711.1	XP_014464672.1	XP_006263826.1	XP_014451148.1	XP_006267750.1 ENSACAP00000007748.3	ENSACAP00000021421.1	ENSACAP00000010473.2	ENSACAP00000005023.2	ENSACAP00000017142.2 XP_005279743.1	XP_005313035.1	XP_008173467.1	XP_008168920.1	XP_005311142.1	XP_005279744.1 ENSGALP00000000815.4	ENSGALP00000043277.1	ENSGALP00000008730.2	ENSGALP00000039262.2	ENSGALP00000004578.1 ENSP00000446643.1	ENSP00000450385.1	ENSP00000301540.8	ENSP00000293422.5	ENSP00000446640.1	ENSP00000446955.1	ENSP00000442375.2	ENSP00000458907.1	ENSP00000461570.1	ENSP00000461121.1	ENSP00000377096.1	ENSP00000347055.1	ENSP00000343321.4	ENSP00000307280.4	ENSP00000379210.1	ENSP00000292327.4	ENSP00000441750.1	ENSP00000446714.1	ENSP00000446721.1	ENSP00000446687.1	ENSP00000450116.1	ENSP00000448859.1	ENSP00000448101.1 ENSPSIP00000011250.1	ENSPSIP00000011361.1	ENSPSIP00000014868.1	ENSPSIP00000014883.1	ENSPSIP00000003269.1	ENSPSIP00000003262.1 gopAga1_00011694-RA	gopAga1_00015660-RB	gopAga1_00015826-RA
OG0000093 ENSP00000485865.1	ENSP00000487020.1	ENSP00000487471.1	ENSP00000486489.1	ENSP00000485821.1	ENSP00000485714.1	ENSP00000487364.1	ENSP00000485874.1	ENSP00000418306.1	ENSP00000420439.1	ENSP00000417397.1	ENSP00000486205.1	ENSP00000487451.1	ENSP00000487409.1	ENSP00000487502.1	ENSP00000487233.1	ENSP00000483919.1	ENSP00000417722.1	ENSP00000417757.1	ENSP00000477983.1	ENSP00000417657.1	ENSP00000419989.1	ENSP00000487131.1	ENSP00000487096.1	ENSP00000486429.1	ENSP00000485768.1	ENSP00000486822.1	ENSP00000486657.1	ENSP00000486982.1	ENSP00000486533.1	ENSP00000487389.1	ENSP00000487312.1	ENSP00000487243.1	ENSP00000486102.1	ENSP00000486101.1	ENSP00000486851.1	ENSP00000486256.1	ENSP00000486911.1	ENSP00000486305.1	ENSP00000487123.1	ENSP00000487329.1	ENSP00000481308.1	ENSP00000486683.1	ENSP00000486425.1	ENSP00000487270.1	ENSP00000487564.1	ENSP00000487180.1	ENSP00000486541.1	ENSP00000487354.1	ENSP00000487226.1
OG0000094 XP_006264847.1	XP_014451797.1	XP_006265003.1	XP_014451800.1	XP_014451798.1	XP_014451799.1	XP_006264848.1 ENSACAP00000002109.2	ENSACAP00000000556.3 XP_005287301.1	XP_005287302.1	XP_005287299.1	XP_005287300.1	XP_005287295.1	XP_005287298.1	XP_005287294.1	XP_005300017.1	XP_005300022.1	XP_005300021.1	XP_008173291.1	XP_005300019.1	XP_005300020.1	XP_005300018.1	XP_005300023.1 ENSGALP00000015922.4	ENSGALP00000038658.2	ENSGALP00000015923.4 ENSP00000339549.5	ENSP00000388667.2	ENSP00000333552.4	ENSP00000453757.2	ENSP00000453390.1	ENSP00000453497.1	ENSP00000380749.3	ENSP00000326296.8	ENSP00000453793.1	ENSP00000341400.4	ENSP00000404185.2	ENSP00000452693.2	ENSP00000380745.2	ENSP00000475899.1	ENSP00000454073.1	ENSP00000452854.1	ENSP00000453307.1	ENSP00000453934.1	ENSP00000381518.2	ENSP00000475161.1	ENSP00000272369.8	ENSP00000454209.1	ENSP00000440571.1 ENSPSIP00000007355.1	ENSPSIP00000010289.1	ENSPSIP00000010275.1	ENSPSIP00000007349.1 gopAga1_00003247-RA	gopAga1_00010454-RA
OG0000095 XP_014460970.1	XP_014460971.1	XP_014460969.1	XP_014460972.1	XP_014460973.1	XP_006276962.2	XP_014457922.1	XP_014457920.1	XP_014457921.1	XP_006271427.2	XP_006265448.1	XP_014461877.1	XP_014452501.1	XP_014461878.1 ENSACAP00000012544.3	ENSACAP00000016973.3	ENSACAP00000020331.1	ENSACAP00000015144.3 XP_005309662.1	XP_005309661.1	XP_008171621.1	XP_008171623.1	XP_008171624.1	XP_005309665.1	XP_005307890.1	XP_005314585.1	XP_008174015.1	XP_005309664.1	XP_008174902.1	XP_005311713.1	XP_005311714.1	XP_005309659.1	XP_005309660.1	XP_005309663.1 ENSGALP00000009612.4	ENSGALP00000010281.3	ENSGALP00000021856.4 ENSP00000229771.6	ENSP00000319414.4	ENSP00000434400.1	ENSP00000299506.2	ENSP00000305426.4	ENSP00000380321.2	ENSP00000410051.2	ENSP00000440364.1	ENSP00000442631.1	ENSP00000477534.1	ENSP00000482208.1	ENSP00000441319.1 ENSPSIP00000006684.1	ENSPSIP00000018685.1	ENSPSIP00000017131.1	ENSPSIP00000003247.1 gopAga1_00001066-RB	gopAga1_00001066-RA	gopAga1_00011945-RA
OG0000096 XP_006275337.1	XP_014462588.1	XP_014456761.1	XP_006260519.1	XP_014456779.1	XP_014455980.1	XP_014452503.1	XP_014452502.1	XP_014452504.1	XP_006264452.1	XP_014456773.1 ENSACAP00000003192.3	ENSACAP00000019122.1	ENSACAP00000014724.2	ENSACAP00000003592.2 XP_005303453.1	XP_005303454.1	XP_008177232.1	XP_008177231.1	XP_005314407.1	XP_005302943.1	XP_005302942.1	XP_005301093.1	XP_005301090.1	XP_005302944.1	XP_005301091.1	XP_005301092.1 ENSGALP00000011672.3	ENSGALP00000027195.3	ENSGALP00000010505.1 ENSP00000397635.1	ENSP00000410125.1	ENSP00000412904.1	ENSP00000395517.1	ENSP00000461397.1	ENSP00000409276.2	ENSP00000406916.1	ENSP00000365301.3	ENSP00000413496.2	ENSP00000393686.1	ENSP00000460753.1	ENSP00000293829.4	ENSP00000459746.1	ENSP00000365313.4	ENSP00000322390.6	ENSP00000303391.4	ENSP00000487411.1	ENSP00000396198.2	ENSP00000465134.1 ENSPSIP00000011595.1	ENSPSIP00000003738.1	ENSPSIP00000011598.1	ENSPSIP00000013257.1 gopAga1_00004647-RA	gopAga1_00009140-RA	gopAga1_00009139-RA
OG0000097 XP_006267571.1	XP_014454221.1	XP_006262410.2	XP_006270773.1	XP_006270774.1	XP_014454222.1	XP_014451819.1	XP_014451821.1	XP_014451822.1	XP_014454223.1	XP_014454220.1	XP_014451820.1	XP_006270772.1 ENSACAP00000016683.3	ENSACAP00000004410.3	ENSACAP00000017258.2 XP_005294797.1	XP_005294799.1	XP_005294795.1	XP_005294796.1	XP_008166958.1	XP_008161549.1	XP_008166180.1	XP_008161547.1	XP_008166182.1	XP_008166184.1	XP_008166181.1	XP_008166183.1	XP_008161550.1	XP_005281400.2	XP_008161548.1	XP_008166959.1	XP_005284952.1 ENSGALP00000017127.1	ENSGALP00000025429.4	ENSGALP00000040915.1 ENSP00000360884.1	ENSP00000360886.1	ENSP00000223951.5	ENSP00000399939.2	ENSP00000390878.1	ENSP00000352162.1	ENSP00000369453.4	ENSP00000369460.1	ENSP00000380479.2	ENSP00000440998.1	ENSP00000360888.4	ENSP00000360889.1	ENSP00000349594.5	ENSP00000360892.1 ENSPSIP00000009449.1	ENSPSIP00000009454.1	ENSPSIP00000017223.1 gopAga1_00002676-RA	gopAga1_00016996-RA	gopAga1_00008791-RA
OG0000098 XP_006268439.1	XP_006268438.1	XP_006268437.1	XP_006264178.1	XP_014466747.1	XP_014453646.1 ENSACAP00000007671.2	ENSACAP00000005512.3	ENSACAP00000016805.3 XP_008177869.1	XP_005288793.1	XP_008177299.1	XP_008177298.1	XP_008177297.1	XP_008177296.1	XP_008177295.1	XP_008177294.1	XP_005305570.1	XP_005305569.1	XP_008177300.1	XP_008163110.1 ENSGALP00000016869.4	ENSGALP00000015691.3 ENSP00000353108.3	ENSP00000417374.1	ENSP00000419514.1	ENSP00000354584.2	ENSP00000355905.2	ENSP00000386171.3	ENSP00000418629.1	ENSP00000352077.2	ENSP00000419594.1	ENSP00000384851.1	ENSP00000441970.1	ENSP00000000442.6	ENSP00000385971.1	ENSP00000355907.2	ENSP00000355904.1	ENSP00000422488.1	ENSP00000451658.1	ENSP00000370270.2	ENSP00000423004.1	ENSP00000424992.1	ENSP00000419155.1	ENSP00000375761.4	ENSP00000481528.1	ENSP00000355225.3 ENSPSIP00000018854.1	ENSPSIP00000006075.1	ENSPSIP00000018860.1	ENSPSIP00000006063.1	ENSPSIP00000020247.1 gopAga1_00003244-RA	gopAga1_00004401-RA	gopAga1_00004314-RB	gopAga1_00004314-RA
OG0000099 XP_014457408.1	XP_014457406.1	XP_014457407.1	XP_014457270.1	XP_014457269.1	XP_006268696.2	XP_014457409.1	XP_014457411.1	XP_014457410.1 ENSACAP00000019783.2	ENSACAP00000005232.2	ENSACAP00000022650.1 XP_005297690.2	XP_008162151.1	XP_008176475.1	XP_008176351.1	XP_005297496.1	XP_005297495.1	XP_005297497.1	XP_008162242.1	XP_008162243.1	XP_008162244.1	XP_008162245.1 ENSGALP00000040881.1	ENSGALP00000012495.4	ENSGALP00000012489.4	ENSGALP00000037451.2	ENSGALP00000030742.2 ENSP00000465863.1	ENSP00000364501.1	ENSP00000376397.2	ENSP00000329507.1	ENSP00000464223.1	ENSP00000464610.1	ENSP00000462309.1	ENSP00000464257.1	ENSP00000463743.1	ENSP00000301573.9	ENSP00000327075.6	ENSP00000343751.4	ENSP00000355294.4	ENSP00000317337.4	ENSP00000415488.1	ENSP00000376395.2 ENSPSIP00000015557.1	ENSPSIP00000015363.1	ENSPSIP00000004628.1	ENSPSIP00000020277.1 gopAga1_00018999-RA	gopAga1_00017206-RA	gopAga1_00017205-RC	gopAga1_00017205-RD	gopAga1_00017205-RA	gopAga1_00009062-RA	gopAga1_00009063-RA	gopAga1_00017257-RA
OG0000100 XP_014453347.1	XP_006274502.2	XP_006274503.1	XP_014457495.1	XP_014455168.1	XP_014462862.1	XP_014462861.1	XP_006274504.1	XP_006270889.2 ENSACAP00000007602.3	ENSACAP00000003560.3	ENSACAP00000012059.3	ENSACAP00000009146.2 XP_005307398.1	XP_005307397.1	XP_005307396.1	XP_008171263.1	XP_008177932.1	XP_008177931.1	XP_008174150.1	XP_005295036.1	XP_005295033.1	XP_005295034.1	XP_005295035.1	XP_005308027.1	XP_005308026.1	XP_005308025.1 ENSGALP00000013240.4	ENSGALP00000042294.1	ENSGALP00000042056.1	ENSGALP00000005340.4 ENSP00000469242.1	ENSP00000470693.1	ENSP00000263373.2	ENSP00000340345.4	ENSP00000375877.1	ENSP00000375879.2	ENSP00000311489.2	ENSP00000374630.3	ENSP00000479037.1	ENSP00000334156.5	ENSP00000451752.1	ENSP00000349259.4	ENSP00000432568.1	ENSP00000374370.3	ENSP00000374371.5	ENSP00000374372.3 ENSPSIP00000003588.1	ENSPSIP00000013176.1 gopAga1_00005804-RC	gopAga1_00005804-RA	gopAga1_00016917-RA	gopAga1_00005804-RB	gopAga1_00008307-RA	gopAga1_00004116-RA	gopAga1_00004115-RA
OG0000101 XP_014455648.1	XP_014463660.1	XP_006272473.1	XP_006272471.1	XP_006272472.1 ENSACAP00000011912.3	ENSACAP00000000147.3	ENSACAP00000004862.2	ENSACAP00000004651.3 XP_008161514.1	XP_008161520.1	XP_008161521.1	XP_008161522.1	XP_008161523.1	XP_008161524.1	XP_008161525.1	XP_008161516.1	XP_008161513.1	XP_008164804.1	XP_008164802.1	XP_008164803.1	XP_008172570.1	XP_008161519.1	XP_008161518.1	XP_008161512.1	XP_008161515.1	XP_008161517.1 ENSGALP00000039303.2	ENSGALP00000039311.2	ENSGALP00000038886.2 ENSP00000360408.1	ENSP00000360414.1	ENSP00000483914.1	ENSP00000351101.6	ENSP00000353362.5	ENSP00000460092.2	ENSP00000356539.5	ENSP00000277551.2	ENSP00000360423.1	ENSP00000360406.4	ENSP00000467729.1	ENSP00000465598.1	ENSP00000350183.6	ENSP00000353222.3	ENSP00000356545.2	ENSP00000356542.1	ENSP00000481619.1	ENSP00000277549.6	ENSP00000479983.1 ENSPSIP00000011793.1	ENSPSIP00000012535.1	ENSPSIP00000009733.1 gopAga1_00005252-RA	gopAga1_00005253-RA	gopAga1_00007095-RA	gopAga1_00010030-RA
OG0000102 XP_014464609.1	XP_014464610.1 ENSACAP00000013579.3 XP_005306462.1	XP_008170909.1	XP_008170908.1	XP_008170905.1	XP_008170904.1	XP_008170906.1	XP_008170901.1	XP_008170910.1	XP_008170903.1	XP_008170902.1	XP_005306469.1	XP_005306467.1	XP_005306468.1	XP_005306465.1	XP_005306466.1	XP_005306450.1	XP_005306451.1	XP_008170918.1	XP_008170912.1	XP_008170913.1	XP_008170911.1	XP_008170916.1	XP_008170917.1	XP_008170914.1	XP_008170915.1	XP_005306455.1	XP_005306454.1	XP_005306453.1	XP_005306452.1	XP_005306461.1	XP_005306460.1	XP_005306458.1	XP_005306456.1	XP_005306464.1 ENSGALP00000039747.2	ENSGALP00000039740.2	ENSGALP00000000914.4	ENSGALP00000000915.2	ENSGALP00000034591.2 ENSP00000384875.1	ENSP00000385676.1	ENSP00000385637.1	ENSP00000384061.1	ENSP00000425908.1	ENSP00000422524.1	ENSP00000415031.1	ENSP00000356141.3	ENSP00000353154.4	ENSP00000438614.1	ENSP00000344786.6 ENSPSIP00000017411.1 gopAga1_00006078-RA	gopAga1_00006079-RA
OG0000103 XP_006272698.1	XP_014456993.1	XP_014452422.1	XP_006267098.1	XP_006267097.1	XP_014455800.1	XP_014455799.1	XP_014456984.1 ENSACAP00000016226.3	ENSACAP00000001074.3	ENSACAP00000021957.1	ENSACAP00000009314.2 XP_005295829.1	XP_005295830.1	XP_008177622.1	XP_008173584.1	XP_008173583.1	XP_005301138.1	XP_005301137.1	XP_005287077.1 ENSGALP00000009728.4	ENSGALP00000027233.3	ENSGALP00000009265.4 ENSP00000384444.3	ENSP00000385687.1	ENSP00000385541.1	ENSP00000446008.1	ENSP00000417020.1	ENSP00000399212.1	ENSP00000384162.3	ENSP00000444886.1	ENSP00000325748.4	ENSP00000380651.3	ENSP00000402764.1	ENSP00000404960.1	ENSP00000419702.1	ENSP00000377868.2	ENSP00000402810.1	ENSP00000365730.3	ENSP00000377867.2	ENSP00000418753.1	ENSP00000346755.6	ENSP00000365737.4	ENSP00000401114.1	ENSP00000403607.1	ENSP00000395104.1	ENSP00000442539.2 ENSPSIP00000005606.1	ENSPSIP00000005603.1	ENSPSIP00000008247.1	ENSPSIP00000003301.1 gopAga1_00001969-RA	gopAga1_00002746-RA	gopAga1_00000674-RA	gopAga1_00000675-RA
OG0000104 XP_014459667.1	XP_014453344.1	XP_014463647.1	XP_014465966.1	XP_014460039.1	XP_014460038.1	XP_014460041.1	XP_014460040.1 ENSACAP00000020972.1	ENSACAP00000017210.3 XP_008174199.1	XP_008173354.1	XP_008173353.1	XP_005312773.2	XP_008174408.1	XP_008175137.1	XP_008175305.1	XP_008174809.1	XP_008174200.1	XP_008173346.1	XP_008173345.1	XP_008174410.1	XP_008176483.1 ENSGALP00000008260.4 ENSP00000375704.3	ENSP00000337383.3	ENSP00000375653.1	ENSP00000375655.3	ENSP00000294752.3	ENSP00000355452.2	ENSP00000341428.5	ENSP00000319377.6	ENSP00000375652.1	ENSP00000355453.2	ENSP00000375703.2 ENSPSIP00000017030.1	ENSPSIP00000011293.1	ENSPSIP00000012294.1	ENSPSIP00000007091.1	ENSPSIP00000012133.1 gopAga1_00014022-RB	gopAga1_00019623-RA	gopAga1_00018061-RA	gopAga1_00016478-RA	gopAga1_00014023-RA	gopAga1_00014112-RA	gopAga1_00014111-RB	gopAga1_00014111-RA	gopAga1_00014880-RA	gopAga1_00012546-RA	gopAga1_00015868-RA	gopAga1_00015866-RA	gopAga1_00019162-RA	gopAga1_00012552-RA	gopAga1_00017767-RA
OG0000105 XP_014459494.1	XP_014459501.1	XP_014459500.1	XP_014459487.1	XP_014459506.1	XP_014459523.1	XP_014459512.1	XP_014459516.1 ENSACAP00000015212.2 XP_005298208.1	XP_008167178.1	XP_008167179.1	XP_008167177.1 ENSP00000487768.1	ENSP00000488116.1	ENSP00000487593.1	ENSP00000487877.1	ENSP00000488717.1	ENSP00000487624.1	ENSP00000488103.1	ENSP00000488347.1	ENSP00000487851.1	ENSP00000488105.1	ENSP00000487649.1	ENSP00000487689.1	ENSP00000460080.1	ENSP00000438224.2	ENSP00000319210.8	ENSP00000328977.7	ENSP00000488018.1	ENSP00000488328.1	ENSP00000488186.1	ENSP00000459716.1	ENSP00000461885.1	ENSP00000459795.1	ENSP00000488470.1	ENSP00000479485.1	ENSP00000476362.3	ENSP00000488661.1	ENSP00000483035.1	ENSP00000476394.1	ENSP00000459992.1	ENSP00000459001.1	ENSP00000460580.1	ENSP00000459666.1	ENSP00000459975.1	ENSP00000488444.1	ENSP00000460171.1	ENSP00000488277.1	ENSP00000488902.1	ENSP00000488835.1	ENSP00000488893.1	ENSP00000488403.1
OG0000106 XP_006278577.1	XP_014462769.1	XP_014449968.1	XP_014449969.1	XP_014449973.1	XP_006264643.1 ENSACAP00000000131.2	ENSACAP00000018357.1	ENSACAP00000017848.2	ENSACAP00000021085.1	ENSACAP00000017824.2	ENSACAP00000017979.1	ENSACAP00000021057.1	ENSACAP00000019253.1	ENSACAP00000000129.2	ENSACAP00000018637.1 XP_005314552.1	XP_008176742.1	XP_005295083.1	XP_005312342.1 ENSGALP00000018964.3 ENSP00000481943.1	ENSP00000310631.3	ENSP00000314042.3	ENSP00000482346.1	ENSP00000333800.2	ENSP00000305766.3	ENSP00000252660.4	ENSP00000436242.1	ENSP00000379571.2 ENSPSIP00000008991.1	ENSPSIP00000005932.1	ENSPSIP00000001193.1	ENSPSIP00000005739.1	ENSPSIP00000000311.1	ENSPSIP00000001170.1	ENSPSIP00000008986.1	ENSPSIP00000000581.1	ENSPSIP00000001145.1	ENSPSIP00000001162.1	ENSPSIP00000018253.1	ENSPSIP00000000150.1	ENSPSIP00000000122.1	ENSPSIP00000002005.1	ENSPSIP00000006119.1	ENSPSIP00000001151.1	ENSPSIP00000018241.1	ENSPSIP00000000558.1	ENSPSIP00000001680.1	ENSPSIP00000018265.1 gopAga1_00011870-RA	gopAga1_00013099-RA	gopAga1_00013875-RA	gopAga1_00011084-RA
OG0000107 ENSACAP00000014286.2	ENSACAP00000016213.2	ENSACAP00000017829.2	ENSACAP00000022838.1 XP_008162834.1	XP_005302607.1	XP_008168881.1	XP_008170078.1	XP_005311207.1 ENSP00000380071.1	ENSP00000459534.1	ENSP00000425318.2	ENSP00000296736.3	ENSP00000317170.2	ENSP00000483808.1	ENSP00000485390.1	ENSP00000461610.1	ENSP00000482410.1	ENSP00000486687.1	ENSP00000333350.4 ENSPSIP00000011398.1	ENSPSIP00000003986.1	ENSPSIP00000015554.1	ENSPSIP00000007553.1	ENSPSIP00000000765.1	ENSPSIP00000019544.1	ENSPSIP00000012999.1	ENSPSIP00000003550.1	ENSPSIP00000002998.1	ENSPSIP00000015080.1	ENSPSIP00000008132.1	ENSPSIP00000018290.1	ENSPSIP00000004187.1	ENSPSIP00000016780.1	ENSPSIP00000008266.1	ENSPSIP00000014198.1	ENSPSIP00000015658.1	ENSPSIP00000011382.1	ENSPSIP00000012610.1	ENSPSIP00000012616.1	ENSPSIP00000015654.1	ENSPSIP00000011876.1	ENSPSIP00000006259.1	ENSPSIP00000003812.1	ENSPSIP00000017807.1	ENSPSIP00000019041.1	ENSPSIP00000004813.1	ENSPSIP00000000048.1	ENSPSIP00000019396.1	ENSPSIP00000006273.1	ENSPSIP00000006266.1 gopAga1_00002541-RA	gopAga1_00010038-RA	gopAga1_00011301-RA
OG0000108 XP_006258753.1	XP_006277568.1	XP_006277569.1 ENSACAP00000017058.3	ENSACAP00000012922.2 XP_005313938.1	XP_005294525.1	XP_005314710.1 ENSGALP00000014092.2 ENSP00000395759.1	ENSP00000415005.1	ENSP00000405515.2	ENSP00000412800.1	ENSP00000364949.3	ENSP00000411189.4	ENSP00000438604.1	ENSP00000284031.8	ENSP00000488725.1	ENSP00000391632.1	ENSP00000404851.1	ENSP00000399357.2	ENSP00000411554.1	ENSP00000404342.1	ENSP00000372901.2	ENSP00000364945.2	ENSP00000410144.1	ENSP00000397466.1	ENSP00000388456.1	ENSP00000382936.3	ENSP00000395372.1	ENSP00000412327.1	ENSP00000391833.2	ENSP00000409450.1	ENSP00000387943.1	ENSP00000416012.1	ENSP00000408148.1	ENSP00000399023.2	ENSP00000403154.1	ENSP00000439045.1	ENSP00000405005.1	ENSP00000414967.1	ENSP00000408572.1	ENSP00000364943.2	ENSP00000382935.1	ENSP00000393967.1	ENSP00000394578.1	ENSP00000409396.2	ENSP00000402594.1	ENSP00000389552.1 ENSPSIP00000016115.1	ENSPSIP00000007576.1 gopAga1_00019955-RA	gopAga1_00009259-RA
OG0000109 XP_014465552.1	XP_014460157.1	XP_014463355.1	XP_014458937.1	XP_006260198.1	XP_014453815.1	XP_014465832.1 ENSACAP00000018170.2	ENSACAP00000021082.1	ENSACAP00000021615.1	ENSACAP00000009998.2	ENSACAP00000006100.2	ENSACAP00000006095.2	ENSACAP00000022764.1	ENSACAP00000020221.1	ENSACAP00000019429.2	ENSACAP00000000289.2	ENSACAP00000022207.1	ENSACAP00000006102.3	ENSACAP00000020593.1	ENSACAP00000021108.1	ENSACAP00000000113.2	ENSACAP00000022539.1	ENSACAP00000006111.3 XP_008170417.1	XP_008170415.1	XP_008170418.1	XP_005304995.1	XP_008173904.1	XP_005304994.2	XP_008170419.1	XP_008170420.1 ENSGALP00000033047.3 ENSP00000279058.3	ENSP00000391380.1	ENSP00000413093.1	ENSP00000361713.2	ENSP00000424176.1	ENSP00000361746.3	ENSP00000387153.1	ENSP00000338114.3	ENSP00000361750.3	ENSP00000243938.4	ENSP00000337815.4	ENSP00000361715.2 ENSPSIP00000019660.1 gopAga1_00014902-RA	gopAga1_00018083-RA	gopAga1_00017740-RA	gopAga1_00014419-RA	gopAga1_00009907-RA	gopAga1_00019801-RA	gopAga1_00017563-RA
OG0000110 XP_006260870.1	XP_006260871.1	XP_006260873.1	XP_006260872.1	XP_006260874.1 ENSACAP00000022849.1 XP_005313505.1	XP_005295457.1	XP_005295456.1	XP_005295455.1	XP_008175349.1	XP_008175348.1	XP_008175351.1	XP_008175344.1	XP_008175347.1	XP_008175346.1	XP_008175352.1	XP_008175353.1	XP_008175350.1 ENSP00000488130.1	ENSP00000488276.1	ENSP00000483545.1	ENSP00000451176.1	ENSP00000450544.1	ENSP00000452276.1	ENSP00000479203.2	ENSP00000450629.1	ENSP00000488781.1	ENSP00000404559.2	ENSP00000479365.1	ENSP00000365370.3	ENSP00000451708.1	ENSP00000481869.1	ENSP00000450548.1	ENSP00000485450.1	ENSP00000488124.1	ENSP00000450790.1	ENSP00000450725.1	ENSP00000338095.6	ENSP00000452213.1	ENSP00000452185.1	ENSP00000451291.1	ENSP00000442816.1	ENSP00000404848.2	ENSP00000450601.1	ENSP00000488742.1	ENSP00000452021.1	ENSP00000478017.1	ENSP00000452214.1	ENSP00000451187.1 ENSPSIP00000013604.1 gopAga1_00011502-RB	gopAga1_00011502-RA
OG0000111 XP_006267207.2	XP_014460506.1	XP_014460507.1	XP_014460503.1	XP_014460504.1	XP_014460505.1	XP_014460511.1	XP_006267204.2	XP_006267209.2	XP_014460508.1	XP_014460502.1	XP_014460509.1	XP_014460513.1	XP_014460512.1 ENSACAP00000003862.3 XP_008167128.1	XP_008167127.1	XP_008167126.1	XP_005286233.1	XP_005286250.1	XP_005286249.1	XP_005286246.1	XP_005286245.1	XP_005286248.1	XP_005286247.1	XP_005286242.1	XP_005286243.1	XP_005286234.1	XP_005286240.1	XP_005286232.1	XP_005286241.1	XP_005286231.1	XP_005286235.1	XP_005286229.1	XP_005286230.1	XP_005286227.1	XP_005286244.1	XP_005286239.1	XP_005286228.1	XP_005286237.1	XP_005286238.1	XP_005286236.1 ENSGALP00000041687.1	ENSGALP00000002021.4 ENSP00000362904.1	ENSP00000362903.1	ENSP00000345259.4	ENSP00000348397.3	ENSP00000290100.6	ENSP00000317597.7	ENSP00000362906.3 ENSPSIP00000008026.1 gopAga1_00008588-RA
OG0000112 XP_006273441.2 ENSACAP00000011267.2 XP_005312389.1 ENSP00000365960.2	ENSP00000365956.2	ENSP00000365954.1	ENSP00000365949.1	ENSP00000365964.1	ENSP00000365963.3	ENSP00000388044.1	ENSP00000403611.1	ENSP00000399723.1	ENSP00000392044.1	ENSP00000392260.1	ENSP00000411693.1	ENSP00000396522.1	ENSP00000399222.1	ENSP00000412297.2	ENSP00000410429.1	ENSP00000383497.1	ENSP00000383498.1	ENSP00000373107.4	ENSP00000383499.1	ENSP00000383495.1	ENSP00000383496.1	ENSP00000403557.2	ENSP00000397132.1	ENSP00000398205.1	ENSP00000407981.2	ENSP00000404779.1	ENSP00000411976.1	ENSP00000390917.1	ENSP00000414808.2	ENSP00000414471.1	ENSP00000406410.1	ENSP00000391581.1	ENSP00000401267.1	ENSP00000390548.1	ENSP00000400589.1	ENSP00000412526.1	ENSP00000409066.1	ENSP00000406648.1	ENSP00000399965.1	ENSP00000404824.1	ENSP00000400763.1	ENSP00000394056.2	ENSP00000415651.1	ENSP00000416038.1	ENSP00000408173.1	ENSP00000411038.2	ENSP00000399167.1 ENSPSIP00000002357.1 gopAga1_00017571-RA
OG0000113 XP_014457945.1	XP_014457952.1	XP_014457951.1	XP_014457949.1	XP_014457948.1	XP_014457946.1	XP_014457947.1	XP_014464904.1	XP_014464928.1	XP_014464912.1	XP_014457944.1	XP_014464915.1	XP_014457950.1	XP_014457943.1	XP_014457941.1	XP_006273899.1	XP_006273902.1 ENSACAP00000012420.2	ENSACAP00000014261.2 XP_005309671.1	XP_005309668.1	XP_008162488.1	XP_005309669.1	XP_005287563.1	XP_005287560.1	XP_005287562.1	XP_005309670.1 ENSGALP00000009581.4	ENSGALP00000009582.4 ENSP00000439275.1	ENSP00000446115.1	ENSP00000481643.1	ENSP00000446463.1	ENSP00000412479.2	ENSP00000444393.1	ENSP00000443807.1	ENSP00000440099.1	ENSP00000445193.1	ENSP00000441360.1	ENSP00000445751.1	ENSP00000261169.6	ENSP00000312856.6	ENSP00000445504.1	ENSP00000442713.1	ENSP00000413703.1	ENSP00000435456.1	ENSP00000404538.2	ENSP00000338207.3	ENSP00000346689.1 ENSPSIP00000017652.1	ENSPSIP00000017644.1	ENSPSIP00000008614.1 gopAga1_00014335-RA
OG0000114 XP_006277686.1	XP_014455164.1 ENSACAP00000015841.2 XP_008174315.1	XP_008174317.1	XP_008174316.1	XP_008174314.1	XP_008174318.1 ENSP00000478423.1	ENSP00000484003.1	ENSP00000478913.1	ENSP00000479987.1	ENSP00000483692.1	ENSP00000481527.1	ENSP00000480220.1	ENSP00000483431.1	ENSP00000477693.1	ENSP00000481681.1	ENSP00000477620.1	ENSP00000481924.1	ENSP00000482531.1	ENSP00000483036.1	ENSP00000483604.1	ENSP00000480876.1	ENSP00000411587.2	ENSP00000420064.1	ENSP00000401703.1	ENSP00000478143.1	ENSP00000484020.1	ENSP00000480585.1	ENSP00000483882.1	ENSP00000484369.1	ENSP00000221232.5	ENSP00000484794.1	ENSP00000483968.1	ENSP00000481624.1	ENSP00000480258.1	ENSP00000478956.1	ENSP00000351159.4	ENSP00000479186.1	ENSP00000480392.1	ENSP00000484040.1	ENSP00000480697.1	ENSP00000398463.1	ENSP00000480988.1	ENSP00000483450.1	ENSP00000478280.1	ENSP00000483360.1 ENSPSIP00000003573.1 gopAga1_00017579-RA	gopAga1_00017579-RD	gopAga1_00017579-RB	gopAga1_00017579-RC
OG0000115 XP_014451610.1	XP_014451611.1	XP_014451608.1	XP_014451609.1	XP_014456220.1	XP_014451607.1	XP_014451606.1	XP_014451598.1	XP_014451605.1 ENSACAP00000017485.2	ENSACAP00000019058.1	ENSACAP00000010300.3	ENSACAP00000017475.3 XP_008162352.1	XP_008162353.1	XP_008162350.1	XP_008162351.1	XP_008162372.1	XP_008162345.1	XP_008162344.1	XP_008162347.1	XP_008162346.1	XP_008162343.1	XP_008162349.1	XP_008162348.1	XP_005293977.1	XP_005293978.1 ENSGALP00000033890.3	ENSGALP00000040218.2	ENSGALP00000002185.4	ENSGALP00000002184.4	ENSGALP00000028426.3	ENSGALP00000002192.3 ENSP00000448104.1	ENSP00000396722.2	ENSP00000363918.1	ENSP00000482061.1	ENSP00000363916.1	ENSP00000416320.3	ENSP00000437668.2	ENSP00000270642.8	ENSP00000330862.7	ENSP00000363910.4	ENSP00000434750.1	ENSP00000445496.1	ENSP00000363923.3 ENSPSIP00000018069.1	ENSPSIP00000003556.1	ENSPSIP00000018034.1 gopAga1_00006092-RA	gopAga1_00006091-RA	gopAga1_00016596-RB	gopAga1_00016596-RA
OG0000116 XP_014451792.1	XP_014460583.1	XP_014460582.1	XP_014460581.1	XP_014460580.1	XP_014451787.1	XP_014451780.1 ENSACAP00000010339.2 XP_008169592.1	XP_008169593.1	XP_008169594.1	XP_008163894.1	XP_008163889.1	XP_008163888.1	XP_008163885.1	XP_008163884.1	XP_008163887.1	XP_008163881.1	XP_008163883.1	XP_008163882.1	XP_005285604.1	XP_008163892.1	XP_008163893.1	XP_008163890.1	XP_008163891.1	XP_008163896.1	XP_008163895.1 ENSGALP00000039343.2	ENSGALP00000018179.4	ENSGALP00000041556.1 ENSP00000400926.1	ENSP00000424451.1	ENSP00000264405.5	ENSP00000425999.1	ENSP00000347329.2	ENSP00000378721.2	ENSP00000408027.2	ENSP00000337602.5	ENSP00000426886.1	ENSP00000421464.1	ENSP00000424635.1	ENSP00000426569.1	ENSP00000421633.1	ENSP00000474124.1	ENSP00000435359.1	ENSP00000359370.3	ENSP00000309070.7 ENSPSIP00000018788.1 gopAga1_00006650-RB	gopAga1_00006650-RC	gopAga1_00006650-RA	gopAga1_00014129-RA	gopAga1_00014129-RB
OG0000117 XP_014453372.1	XP_014453376.1 ENSACAP00000005165.2	ENSACAP00000006277.2	ENSACAP00000006502.3 XP_005313795.2	XP_005314913.1	XP_005314912.1	XP_008175592.1	XP_005313365.2	XP_008175312.1	XP_008175660.1	XP_008175287.1	XP_008175285.1	XP_008175284.1	XP_008165562.1	XP_008165563.1	XP_008175286.1	XP_005315070.2	XP_005313368.1	XP_008176154.1	XP_005313927.1	XP_008165410.1	XP_008175565.1	XP_008175567.1	XP_005293070.1 ENSGALP00000041747.1 ENSP00000454623.1	ENSP00000268296.4	ENSP00000287497.8	ENSP00000441691.2	ENSP00000373854.2	ENSP00000461850.1 ENSPSIP00000008644.1	ENSPSIP00000010979.1	ENSPSIP00000019722.1	ENSPSIP00000005242.1	ENSPSIP00000004376.1 gopAga1_00010785-RA	gopAga1_00010785-RB	gopAga1_00010785-RC	gopAga1_00010787-RA	gopAga1_00010785-RD	gopAga1_00019299-RB	gopAga1_00019298-RA	gopAga1_00018572-RA	gopAga1_00018572-RB	gopAga1_00010779-RA	gopAga1_00010780-RB	gopAga1_00010780-RA	gopAga1_00010786-RB	gopAga1_00010786-RA	gopAga1_00019299-RA
OG0000118 XP_014465308.1	XP_014465309.1	XP_014465310.1	XP_014465311.1	XP_014465312.1	XP_014465314.1	XP_014459006.1	XP_014458878.1 ENSACAP00000015987.2	ENSACAP00000018907.1	ENSACAP00000016083.2	ENSACAP00000016040.2	ENSACAP00000016021.3 XP_008174499.1	XP_005314245.1	XP_008176120.1	XP_005311607.2	XP_005311608.2	XP_008174500.1	XP_008174501.1	XP_008174502.1	XP_008175266.1 ENSGALP00000020441.3	ENSGALP00000022851.3 ENSP00000487490.1	ENSP00000481056.1	ENSP00000479036.1 ENSPSIP00000009061.1	ENSPSIP00000008295.1	ENSPSIP00000006249.1	ENSPSIP00000006261.1	ENSPSIP00000008542.1	ENSPSIP00000008529.1	ENSPSIP00000009497.1	ENSPSIP00000008533.1 gopAga1_00016945-RA	gopAga1_00019179-RA	gopAga1_00016944-RA	gopAga1_00018746-RA	gopAga1_00015484-RA	gopAga1_00017540-RA	gopAga1_00017542-RA	gopAga1_00017543-RA	gopAga1_00015526-RA	gopAga1_00015525-RA	gopAga1_00016965-RA	gopAga1_00016964-RA	gopAga1_00016946-RA	gopAga1_00017283-RA	gopAga1_00017541-RA	gopAga1_00015524-RA	gopAga1_00017284-RA	gopAga1_00016966-RA
OG0000119 ENSACAP00000021986.1	ENSACAP00000022823.1	ENSACAP00000021740.1	ENSACAP00000023479.1	ENSACAP00000022013.1	ENSACAP00000022332.1	ENSACAP00000023399.1	ENSACAP00000021755.1	ENSACAP00000022924.1	ENSACAP00000022169.1	ENSACAP00000021841.1	ENSACAP00000023432.1	ENSACAP00000021994.1	ENSACAP00000022982.1	ENSACAP00000021958.1	ENSACAP00000022016.1	ENSACAP00000022306.1	ENSACAP00000022671.1	ENSACAP00000022621.1	ENSACAP00000022279.1	ENSACAP00000023221.1	ENSACAP00000022784.1	ENSACAP00000022335.1	ENSACAP00000022780.1	ENSACAP00000022228.1	ENSACAP00000022942.1	ENSACAP00000022521.1	ENSACAP00000023180.1	ENSACAP00000023135.1	ENSACAP00000022791.1	ENSACAP00000021696.1	ENSACAP00000022873.1	ENSACAP00000022813.1	ENSACAP00000022675.1	ENSACAP00000022478.1	ENSACAP00000021697.1	ENSACAP00000023050.1	ENSACAP00000023464.1	ENSACAP00000023004.1	ENSACAP00000022033.1	ENSACAP00000022079.1	ENSACAP00000022430.1	ENSACAP00000022157.1	ENSACAP00000022662.1 XP_008164725.1	XP_008176438.1 ENSPSIP00000000445.1	ENSPSIP00000001149.1	ENSPSIP00000014386.1	ENSPSIP00000000685.1	ENSPSIP00000000696.1	ENSPSIP00000001914.1 gopAga1_00004821-RA
OG0000120 XP_014464978.1	XP_006257815.1 ENSACAP00000021793.1	ENSACAP00000008827.3 XP_008163544.1	XP_008163545.1	XP_008163546.1	XP_008163547.1	XP_008163540.1	XP_008163541.1	XP_008163542.1	XP_008163543.1	XP_008163548.1	XP_008163549.1	XP_005295452.1	XP_005295451.1	XP_005295454.1	XP_008163537.1	XP_008163550.1	XP_008163539.1	XP_005295450.1	XP_005295453.1	XP_008163538.1 ENSGALP00000039622.2	ENSGALP00000025427.4	ENSGALP00000030219.3 ENSP00000246194.3	ENSP00000403744.1	ENSP00000415973.1	ENSP00000364255.3	ENSP00000413638.1	ENSP00000430367.1	ENSP00000428667.1	ENSP00000428711.1	ENSP00000430065.1	ENSP00000430394.1	ENSP00000427787.1	ENSP00000452599.1	ENSP00000450669.1	ENSP00000452573.1	ENSP00000450467.1	ENSP00000451292.1	ENSP00000429284.1	ENSP00000428807.1	ENSP00000428310.1	ENSP00000430128.1	ENSP00000451892.1 ENSPSIP00000012390.1	ENSPSIP00000019993.1 gopAga1_00011502-RC	gopAga1_00005538-RA	gopAga1_00010517-RA
OG0000121 XP_014464090.1 XP_008161242.1	XP_008168135.1	XP_008168134.1	XP_008176434.1	XP_005284706.1	XP_005284707.1	XP_005291998.1	XP_008163560.1 ENSP00000362427.1	ENSP00000482579.1	ENSP00000352920.4 gopAga1_00017649-RA	gopAga1_00017650-RA	gopAga1_00015448-RA	gopAga1_00015449-RA	gopAga1_00020140-RA	gopAga1_00015513-RA	gopAga1_00005408-RA	gopAga1_00013832-RA	gopAga1_00018198-RA	gopAga1_00013833-RA	gopAga1_00008984-RA	gopAga1_00015181-RA	gopAga1_00013193-RA	gopAga1_00013194-RA	gopAga1_00010737-RA	gopAga1_00010736-RA	gopAga1_00011433-RA	gopAga1_00005453-RA	gopAga1_00020008-RA	gopAga1_00007595-RA	gopAga1_00011798-RA	gopAga1_00017702-RA	gopAga1_00017648-RA	gopAga1_00001009-RA	gopAga1_00000764-RA	gopAga1_00019222-RA	gopAga1_00006733-RA	gopAga1_00006732-RA	gopAga1_00015512-RA	gopAga1_00016307-RA	gopAga1_00016306-RA	gopAga1_00019794-RA	gopAga1_00016671-RA	gopAga1_00016672-RA	gopAga1_00019793-RA	gopAga1_00008586-RA	gopAga1_00004650-RA	gopAga1_00002599-RA	gopAga1_00017289-RA	gopAga1_00017288-RA
OG0000122 ENSP00000404001.1	ENSP00000408790.1	ENSP00000383258.1	ENSP00000392422.1	ENSP00000484588.1	ENSP00000403454.1	ENSP00000484013.1	ENSP00000390361.1	ENSP00000400536.1	ENSP00000427597.1	ENSP00000390593.2	ENSP00000394273.2	ENSP00000421978.1	ENSP00000409682.2	ENSP00000422108.1	ENSP00000479195.1	ENSP00000395136.1	ENSP00000402013.1	ENSP00000399276.1	ENSP00000400697.1	ENSP00000389085.1	ENSP00000388866.1	ENSP00000393056.1	ENSP00000414878.1	ENSP00000406688.1	ENSP00000402647.1	ENSP00000415865.1	ENSP00000414928.1	ENSP00000396609.1	ENSP00000406865.1	ENSP00000402992.1	ENSP00000396187.1	ENSP00000398904.1	ENSP00000395405.1	ENSP00000365759.4	ENSP00000415870.1	ENSP00000383332.1	ENSP00000407068.1	ENSP00000390043.1	ENSP00000401304.1	ENSP00000402765.1	ENSP00000423749.1	ENSP00000425113.1	ENSP00000409400.2	ENSP00000422467.1	ENSP00000379631.2	ENSP00000426229.1	ENSP00000426420.1	ENSP00000479204.1	ENSP00000391895.1
OG0000123 XP_006272093.1	XP_006258100.1	XP_006258102.1	XP_006258101.1	XP_006258094.1	XP_006258095.1	XP_014460102.1	XP_006258096.1	XP_006258099.1 ENSACAP00000012970.3	ENSACAP00000007986.3 XP_005300636.2	XP_008167986.1	XP_005306692.2	XP_005306691.2	XP_005306690.2	XP_005306694.2	XP_005306693.2	XP_005308693.1	XP_005308692.1	XP_008167993.1 ENSGALP00000030567.3	ENSGALP00000009251.3 ENSP00000466673.1	ENSP00000385686.1	ENSP00000405327.1	ENSP00000384085.4	ENSP00000385381.2	ENSP00000413836.1	ENSP00000385551.2	ENSP00000384138.1	ENSP00000410819.1	ENSP00000391043.1	ENSP00000393078.1	ENSP00000411626.2	ENSP00000406931.1	ENSP00000468636.1	ENSP00000388737.1	ENSP00000405157.1	ENSP00000413755.1	ENSP00000412171.1	ENSP00000389707.1	ENSP00000306894.5	ENSP00000242066.5	ENSP00000382293.3 ENSPSIP00000015907.1	ENSPSIP00000009448.1 gopAga1_00008440-RA	gopAga1_00007279-RA	gopAga1_00007278-RA	gopAga1_00008439-RA
OG0000124 XP_014460804.1	XP_014462963.1	XP_014457690.1	XP_014457691.1	XP_006266503.1	XP_006266502.1	XP_006258245.1	XP_014452249.1	XP_014452250.1	XP_006266501.1 ENSACAP00000008382.3	ENSACAP00000010147.3	ENSACAP00000005401.3	ENSACAP00000002853.3 XP_005305972.1	XP_008170759.1	XP_005291239.1	XP_005305969.1	XP_005305970.1	XP_005305971.1	XP_005308031.1	XP_008171402.1	XP_008171400.1 ENSGALP00000023085.4	ENSGALP00000015409.4	ENSGALP00000015410.4	ENSGALP00000023309.4 ENSP00000489220.1	ENSP00000488962.1	ENSP00000426797.1	ENSP00000443495.1	ENSP00000355537.4	ENSP00000438384.2	ENSP00000439828.2	ENSP00000193403.6	ENSP00000366035.3	ENSP00000414272.2	ENSP00000439497.1	ENSP00000252699.2	ENSP00000377941.4 ENSPSIP00000005083.1	ENSPSIP00000005072.1	ENSPSIP00000009799.1	ENSPSIP00000009416.1	ENSPSIP00000013365.1 gopAga1_00008303-RB	gopAga1_00012775-RA	gopAga1_00012775-RB	gopAga1_00004186-RA	gopAga1_00009798-RA	gopAga1_00004186-RB
OG0000125 XP_014449358.1	XP_014449359.1	XP_014449554.1	XP_006262605.1 ENSACAP00000009075.3	ENSACAP00000010881.3 XP_005279065.1	XP_008171008.1	XP_008169804.1	XP_005306658.1	XP_005306657.1	XP_005306655.1	XP_005300147.1	XP_005300148.1	XP_005300145.1	XP_005300146.1	XP_008164865.1	XP_005279061.1	XP_005306654.1	XP_005306650.1	XP_005306651.1	XP_005306652.1	XP_005306653.1 ENSGALP00000041953.1	ENSGALP00000023705.4	ENSGALP00000018052.4 ENSP00000360084.5	ENSP00000342637.4	ENSP00000332116.4	ENSP00000397548.2	ENSP00000392947.2	ENSP00000432592.1	ENSP00000442734.2	ENSP00000425605.1	ENSP00000321739.8	ENSP00000423094.2	ENSP00000384806.2	ENSP00000353152.5	ENSP00000345502.6	ENSP00000351800.6	ENSP00000424852.1	ENSP00000421013.1 ENSPSIP00000007259.1	ENSPSIP00000009669.1	ENSPSIP00000002164.1	ENSPSIP00000009763.1 gopAga1_00018032-RA	gopAga1_00008721-RA	gopAga1_00016762-RA	gopAga1_00008404-RA	gopAga1_00008721-RB
OG0000126 XP_006264501.1 ENSACAP00000009909.3 XP_005280366.1	XP_005280365.1	XP_008174938.1	XP_008174941.1	XP_005280371.1	XP_005280373.1	XP_008174946.1	XP_008174927.1	XP_008174949.1 ENSGALP00000022584.4 ENSP00000432851.1	ENSP00000410825.2	ENSP00000341050.5	ENSP00000433227.1	ENSP00000356788.4	ENSP00000413011.2	ENSP00000403387.2	ENSP00000434723.1	ENSP00000432877.1	ENSP00000437264.1	ENSP00000435293.1	ENSP00000356786.2	ENSP00000436602.1	ENSP00000339992.5	ENSP00000434917.1	ENSP00000477898.1	ENSP00000479896.1	ENSP00000390460.2	ENSP00000435595.1	ENSP00000437081.1	ENSP00000434639.1	ENSP00000432168.1	ENSP00000433745.1	ENSP00000434816.1	ENSP00000434795.1	ENSP00000432811.1	ENSP00000435497.1	ENSP00000435055.1	ENSP00000436605.1	ENSP00000433844.1	ENSP00000432948.1	ENSP00000436385.1	ENSP00000433458.1	ENSP00000435578.1	ENSP00000434420.1	ENSP00000326328.8 ENSPSIP00000013445.1	ENSPSIP00000013438.1 gopAga1_00004017-RA
OG0000127 XP_014455181.1	XP_006265622.1	XP_006265621.1	XP_014466045.1	XP_014466044.1	XP_014466047.1	XP_014466046.1	XP_014466048.1	XP_014466049.1	XP_014466050.1	XP_014466051.1 ENSACAP00000005402.3 XP_008167402.1	XP_005311978.1	XP_008167400.1	XP_008167401.1	XP_008164019.1	XP_008164018.1	XP_008164017.1	XP_008164016.1	XP_008164015.1	XP_008164014.1	XP_008167396.1	XP_005311979.1	XP_008167395.1	XP_005311975.1	XP_008167399.1	XP_008167398.1	XP_008167397.1	XP_008167394.1	XP_008167393.1	XP_008167392.1	XP_008167391.1	XP_008167390.1 ENSGALP00000009387.4	ENSGALP00000006494.4 ENSP00000473921.1	ENSP00000413625.1	ENSP00000415602.2	ENSP00000260506.8	ENSP00000271234.7	ENSP00000397451.2	ENSP00000359275.2	ENSP00000347907.3	ENSP00000407548.2	ENSP00000389117.3 ENSPSIP00000006564.1	ENSPSIP00000009233.1	ENSPSIP00000006560.1 gopAga1_00012310-RA	gopAga1_00008321-RA
OG0000128 XP_006266814.1	XP_014459852.1	XP_014459853.1 ENSACAP00000002178.3	ENSACAP00000010759.3 XP_005312285.1	XP_005312287.1	XP_005307090.1 ENSGALP00000021529.4 ENSP00000449449.1	ENSP00000408938.2	ENSP00000373132.4	ENSP00000406066.1	ENSP00000373034.4	ENSP00000373029.4	ENSP00000373033.4	ENSP00000373035.3	ENSP00000366233.4	ENSP00000373134.4	ENSP00000411263.1	ENSP00000448531.1	ENSP00000373133.4	ENSP00000391572.1	ENSP00000366211.4	ENSP00000366215.4	ENSP00000405709.1	ENSP00000412044.2	ENSP00000416903.2	ENSP00000348248.3	ENSP00000399861.1	ENSP00000448763.1	ENSP00000419061.1	ENSP00000366176.3	ENSP00000489352.1	ENSP00000259455.2	ENSP00000399318.2	ENSP00000448654.1	ENSP00000373135.2	ENSP00000449342.1	ENSP00000411286.2	ENSP00000394528.2	ENSP00000406499.2	ENSP00000446983.1	ENSP00000416731.2	ENSP00000448999.1	ENSP00000412167.2	ENSP00000388035.2	ENSP00000406285.1 ENSPSIP00000009476.1 gopAga1_00016995-RB	gopAga1_00016995-RA
OG0000129 XP_014452884.1 ENSACAP00000012229.3	ENSACAP00000017655.2 XP_005279668.1	XP_005279666.1	XP_005279667.1 ENSGALP00000001452.3	ENSGALP00000000375.2 ENSP00000378877.1	ENSP00000364245.2	ENSP00000378875.1	ENSP00000337463.6	ENSP00000378874.1	ENSP00000364248.3	ENSP00000406582.1	ENSP00000395613.1	ENSP00000415015.2	ENSP00000388253.2	ENSP00000404106.2	ENSP00000382725.1	ENSP00000372782.4	ENSP00000388815.2	ENSP00000388090.1	ENSP00000407189.2	ENSP00000408842.1	ENSP00000398016.1	ENSP00000397765.1	ENSP00000392820.2	ENSP00000395863.1	ENSP00000405864.2	ENSP00000392083.1	ENSP00000412805.1	ENSP00000382728.3	ENSP00000382723.1	ENSP00000387810.2	ENSP00000401410.1	ENSP00000405565.1	ENSP00000410831.1	ENSP00000406614.1	ENSP00000389516.1	ENSP00000390988.1	ENSP00000382726.1	ENSP00000382721.1	ENSP00000387738.2	ENSP00000401287.1	ENSP00000394919.1	ENSP00000412304.1	ENSP00000388870.2	ENSP00000408032.1	ENSP00000406615.1 gopAga1_00019632-RA
OG0000130 XP_014465511.1	XP_006259599.2	XP_014459176.1	XP_006274659.2	XP_006274661.2	XP_006260915.2	XP_006273020.2	XP_014465620.1	XP_014465578.1	XP_006259598.2	XP_006259589.1	XP_006259590.1 XP_005313727.1	XP_005292237.1	XP_005292236.1	XP_005292265.1	XP_005313719.1	XP_005292238.1	XP_008170970.1	XP_008170971.1 ENSGALP00000020550.4	ENSGALP00000042130.1 ENSP00000348064.4	ENSP00000304313.5	ENSP00000422287.1	ENSP00000421431.1	ENSP00000421345.1	ENSP00000343843.5	ENSP00000380258.3	ENSP00000380257.3	ENSP00000352992.4	ENSP00000402737.2	ENSP00000425327.1 ENSPSIP00000000326.1	ENSPSIP00000005612.1	ENSPSIP00000002505.1	ENSPSIP00000018329.1	ENSPSIP00000005646.1	ENSPSIP00000005868.1	ENSPSIP00000005818.1	ENSPSIP00000002507.1	ENSPSIP00000019039.1 gopAga1_00018569-RA	gopAga1_00020164-RA	gopAga1_00017199-RC	gopAga1_00017200-RA	gopAga1_00017199-RB	gopAga1_00017199-RA	gopAga1_00017745-RA	gopAga1_00017744-RA
OG0000131 XP_014451725.1	XP_006264230.1 ENSACAP00000018889.1 XP_008171968.1 ENSGALP00000012117.4 ENSP00000487522.1	ENSP00000487383.1	ENSP00000479614.2	ENSP00000486465.1	ENSP00000485734.1	ENSP00000479199.2	ENSP00000481715.2	ENSP00000487412.1	ENSP00000481518.2	ENSP00000487084.1	ENSP00000485944.1	ENSP00000487574.1	ENSP00000485749.1	ENSP00000486565.1	ENSP00000419798.1	ENSP00000304207.6	ENSP00000338109.4	ENSP00000420243.1	ENSP00000480691.1	ENSP00000417498.3	ENSP00000483270.1	ENSP00000487235.1	ENSP00000486902.1	ENSP00000478400.1	ENSP00000478625.1	ENSP00000482178.1	ENSP00000486556.1	ENSP00000486965.1	ENSP00000482172.2	ENSP00000480194.2	ENSP00000481623.1	ENSP00000487492.1	ENSP00000485898.1	ENSP00000486164.1	ENSP00000480849.1	ENSP00000486046.1	ENSP00000486183.1	ENSP00000486210.1	ENSP00000485685.1	ENSP00000486518.1	ENSP00000485835.1	ENSP00000487046.1 ENSPSIP00000002283.1 gopAga1_00016337-RB	gopAga1_00016337-RA
OG0000132 XP_014449422.1	XP_014449420.1	XP_014449419.1	XP_014449418.1	XP_014449421.1	XP_006277157.1	XP_014449416.1	XP_014449417.1	XP_014449415.1	XP_014453253.1 ENSACAP00000005988.2	ENSACAP00000012212.3 XP_008164581.1	XP_008164580.1	XP_008164582.1	XP_005281046.1	XP_008165014.1	XP_008165015.1	XP_008165016.1	XP_008165017.1	XP_008164579.1	XP_005296242.1	XP_005296241.1	XP_008168553.1 ENSGALP00000003792.4	ENSGALP00000042521.1	ENSGALP00000039322.2 ENSP00000287202.5	ENSP00000457863.1	ENSP00000378677.2	ENSP00000454749.1	ENSP00000443498.1	ENSP00000464794.1	ENSP00000468109.1	ENSP00000465125.2	ENSP00000402503.1	ENSP00000290583.4	ENSP00000467056.2	ENSP00000410584.2	ENSP00000439956.2	ENSP00000290585.4	ENSP00000474788.2	ENSP00000469627.1	ENSP00000355089.4	ENSP00000464917.1	ENSP00000335631.4 ENSPSIP00000017495.1	ENSPSIP00000012193.1 gopAga1_00013659-RA	gopAga1_00000436-RA
OG0000133 XP_014449726.1	XP_014449727.1	XP_014449725.1	XP_014449728.1	XP_014458701.1 ENSACAP00000011931.2	ENSACAP00000004435.3	ENSACAP00000009498.3 XP_008161626.1	XP_008161627.1	XP_008160870.1	XP_005299962.1	XP_008160873.1	XP_008161628.1	XP_008161629.1	XP_008169672.1	XP_008169673.1	XP_008161632.1	XP_008161634.1	XP_008160871.1	XP_008160872.1	XP_008161631.1	XP_008161630.1	XP_005299960.1	XP_008160869.1 ENSGALP00000033098.3	ENSGALP00000017619.4 ENSP00000264606.3	ENSP00000383912.1	ENSP00000410337.2	ENSP00000408617.2	ENSP00000384382.3	ENSP00000384657.3	ENSP00000395655.2	ENSP00000384017.1	ENSP00000388568.2	ENSP00000225983.5	ENSP00000468004.1	ENSP00000401669.2	ENSP00000440481.2	ENSP00000410551.1	ENSP00000478829.1	ENSP00000430036.1 ENSPSIP00000020522.1	ENSPSIP00000015149.1	ENSPSIP00000013270.1 gopAga1_00013743-RA	gopAga1_00013743-RB	gopAga1_00001487-RA	gopAga1_00005181-RA
OG0000134 XP_014460818.1	XP_014460823.1	XP_014459811.1	XP_014460830.1	XP_014460834.1	XP_014460766.1	XP_014460841.1	XP_014460838.1 ENSACAP00000014876.3	ENSACAP00000005688.3	ENSACAP00000010476.3 XP_008166293.1	XP_008166297.1	XP_008166296.1	XP_008166294.1	XP_008166299.1	XP_008166298.1	XP_005305037.1	XP_005288596.1	XP_008166308.1	XP_008166303.1	XP_008166300.1	XP_008166301.1	XP_008166306.1	XP_008166307.1	XP_005305038.1	XP_008166305.1	XP_005288597.1	XP_008166304.1	XP_005288587.1	XP_005305039.1	XP_005288594.1	XP_005288593.1	XP_005288592.1 ENSGALP00000012855.3	ENSGALP00000012746.4	ENSGALP00000013429.4 ENSP00000263665.6	ENSP00000341882.2	ENSP00000380602.1	ENSP00000396010.1	ENSP00000413642.1	ENSP00000380600.2	ENSP00000407822.2 ENSPSIP00000004401.1	ENSPSIP00000002454.1	ENSPSIP00000019410.1 gopAga1_00004306-RA	gopAga1_00013036-RA	gopAga1_00007718-RA
OG0000135 ENSACAP00000020050.1	ENSACAP00000020012.1	ENSACAP00000021066.1	ENSACAP00000022139.1	ENSACAP00000018990.1	ENSACAP00000019198.1	ENSACAP00000018379.1	ENSACAP00000006644.2	ENSACAP00000021522.1	ENSACAP00000020884.1	ENSACAP00000023105.1	ENSACAP00000022423.1	ENSACAP00000018486.1	ENSACAP00000019393.1	ENSACAP00000019977.1	ENSACAP00000022718.1	ENSACAP00000022618.1	ENSACAP00000018349.1	ENSACAP00000019698.1	ENSACAP00000021588.1	ENSACAP00000022402.1	ENSACAP00000021002.1	ENSACAP00000020203.1	ENSACAP00000021644.1	ENSACAP00000018794.1	ENSACAP00000022559.1	ENSACAP00000019318.1	ENSACAP00000020607.1	ENSACAP00000021677.1	ENSACAP00000018319.1	ENSACAP00000023123.1	ENSACAP00000018762.1	ENSACAP00000019480.1	ENSACAP00000019101.1	ENSACAP00000022126.1	ENSACAP00000019186.1	ENSACAP00000020583.1	ENSACAP00000021370.1	ENSACAP00000019184.1	ENSACAP00000020820.1	ENSACAP00000018589.1	ENSACAP00000020563.1	ENSACAP00000022034.1	ENSACAP00000020158.1	ENSACAP00000021828.1	ENSACAP00000022322.1	ENSACAP00000020276.1	ENSACAP00000019499.1	ENSACAP00000022299.1	ENSACAP00000022902.1
OG0000136 XP_006259826.1	XP_006259829.1	XP_006259831.1	XP_006259828.1	XP_014466524.1	XP_014466526.1	XP_014466520.1	XP_014466521.1	XP_014466522.1	XP_014466523.1	XP_014466525.1 ENSACAP00000014152.3 XP_005280312.1	XP_008174698.1	XP_008174719.1	XP_008174753.1	XP_008174737.1	XP_008174713.1	XP_008174758.1	XP_008174716.1	XP_008174766.1	XP_008174762.1	XP_005280309.1	XP_005280310.1	XP_005280311.1	XP_008174746.1	XP_008174724.1	XP_008174726.1	XP_008174729.1	XP_008174705.1	XP_008174721.1	XP_008174772.1 ENSGALP00000022646.4 ENSP00000434576.1	ENSP00000402041.2	ENSP00000434308.1	ENSP00000376222.3	ENSP00000338481.3	ENSP00000436348.1	ENSP00000486691.1	ENSP00000477544.1	ENSP00000431988.1	ENSP00000432803.1	ENSP00000436641.1	ENSP00000431647.1	ENSP00000357110.2 ENSPSIP00000011986.1	ENSPSIP00000011975.1 gopAga1_00010871-RA
OG0000137 XP_006272101.1	XP_006268201.1	XP_006273400.1	XP_006268198.1	XP_014465543.1	XP_006268200.1	XP_006268199.1	XP_014465544.1	XP_006268197.1	XP_014460098.1 ENSACAP00000008819.3	ENSACAP00000005828.2	ENSACAP00000008104.3 XP_008161168.1	XP_008161169.1	XP_008161160.1	XP_008161161.1	XP_008161162.1	XP_008161163.1	XP_008161164.1	XP_008161165.1	XP_008161166.1	XP_008167756.1	XP_008161170.1	XP_008161159.1	XP_008161158.1	XP_008161155.1	XP_008161156.1	XP_005303723.1	XP_005291957.1	XP_005303722.1 ENSGALP00000042882.1	ENSGALP00000040387.2	ENSGALP00000011232.3 ENSP00000448177.1	ENSP00000345771.6	ENSP00000352842.5	ENSP00000370517.4	ENSP00000269848.6	ENSP00000449426.1	ENSP00000309438.7 ENSPSIP00000004504.1	ENSPSIP00000009638.1	ENSPSIP00000009627.1	ENSPSIP00000004508.1 gopAga1_00005470-RA	gopAga1_00011977-RA	gopAga1_00011977-RB	gopAga1_00014692-RA
OG0000138 XP_014449753.1	XP_014449752.1	XP_006274441.1	XP_006274439.1 ENSACAP00000015727.3 XP_008168057.1	XP_008168082.1	XP_008168077.1	XP_008168065.1	XP_008168064.1	XP_008168067.1	XP_008168066.1	XP_008168061.1	XP_008168060.1	XP_008168063.1	XP_008168062.1	XP_008168068.1	XP_008168084.1	XP_008168085.1	XP_008168075.1	XP_008168086.1	XP_008168069.1	XP_008168058.1	XP_008168059.1	XP_008168072.1	XP_008168073.1	XP_008168070.1	XP_008168071.1	XP_008168080.1	XP_008168081.1	XP_008168074.1	XP_008168083.1	XP_008168054.1	XP_008168055.1	XP_008168056.1	XP_008168079.1	XP_008168050.1	XP_008168051.1	XP_008168053.1	XP_008168076.1	XP_008168078.1	XP_005281866.1	XP_005281867.1 ENSGALP00000006137.4 ENSP00000310109.9 ENSPSIP00000019004.1	ENSPSIP00000018976.1 gopAga1_00012590-RA	gopAga1_00012591-RA
OG0000139 XP_014450022.1	XP_014450023.1 ENSACAP00000012097.2	ENSACAP00000010610.3 XP_005289374.1	XP_008171663.1 ENSP00000398775.1	ENSP00000407054.1	ENSP00000407419.1	ENSP00000391463.1	ENSP00000411853.1	ENSP00000415802.1	ENSP00000400326.1	ENSP00000404228.1	ENSP00000412609.1	ENSP00000399542.1	ENSP00000406348.1	ENSP00000379475.1	ENSP00000416269.1	ENSP00000399371.1	ENSP00000395671.1	ENSP00000399030.1	ENSP00000404695.1	ENSP00000407647.1	ENSP00000365347.2	ENSP00000373000.2	ENSP00000383151.1	ENSP00000383152.1	ENSP00000383149.1	ENSP00000406085.1	ENSP00000413576.1	ENSP00000416358.1	ENSP00000394329.1	ENSP00000396559.1	ENSP00000405560.1	ENSP00000411136.1	ENSP00000389350.1	ENSP00000393712.1	ENSP00000242776.3	ENSP00000410277.1	ENSP00000394160.1	ENSP00000413832.1	ENSP00000388880.1	ENSP00000387994.1	ENSP00000390999.1	ENSP00000407427.1 ENSPSIP00000012673.1 gopAga1_00006906-RA	gopAga1_00016749-RB
OG0000140 XP_014463755.1	XP_014463756.1	XP_014463754.1 ENSACAP00000010691.3 XP_005279375.1 ENSP00000398422.2	ENSP00000415000.1	ENSP00000394357.2	ENSP00000389129.2	ENSP00000391244.2	ENSP00000406421.2	ENSP00000373079.4	ENSP00000383419.1	ENSP00000383420.1	ENSP00000373076.4	ENSP00000373077.4	ENSP00000416994.2	ENSP00000365668.4	ENSP00000324222.7	ENSP00000365666.4	ENSP00000324459.5	ENSP00000388171.1	ENSP00000327832.5	ENSP00000332374.8	ENSP00000412198.1	ENSP00000393269.1	ENSP00000406071.1	ENSP00000409067.2	ENSP00000405656.1	ENSP00000405036.2	ENSP00000373078.2	ENSP00000411050.2	ENSP00000411362.1	ENSP00000415408.1	ENSP00000416925.2	ENSP00000393868.1	ENSP00000399452.2	ENSP00000398374.2	ENSP00000409296.1	ENSP00000394914.2	ENSP00000399509.2	ENSP00000403142.1	ENSP00000399529.1	ENSP00000402998.1	ENSP00000412993.2	ENSP00000410415.1	ENSP00000388617.1 ENSPSIP00000013149.1 gopAga1_00009921-RA
OG0000141 XP_014466369.1 ENSACAP00000003797.2 XP_005293123.1	XP_005293124.1	XP_005293100.1	XP_008175561.1	XP_008175560.1	XP_008175563.1	XP_008175562.1 ENSGALP00000019386.4 ENSP00000484065.1	ENSP00000480735.1	ENSP00000483834.1	ENSP00000476021.2	ENSP00000488927.1	ENSP00000476060.3	ENSP00000489459.1	ENSP00000481748.1	ENSP00000478020.1	ENSP00000489211.1	ENSP00000489470.1	ENSP00000479867.1	ENSP00000483677.1	ENSP00000351927.4	ENSP00000353820.5	ENSP00000489366.1	ENSP00000486123.1	ENSP00000489410.1	ENSP00000487558.1	ENSP00000374620.4	ENSP00000486298.1	ENSP00000486094.1	ENSP00000486619.1	ENSP00000479001.1	ENSP00000483245.1	ENSP00000488999.1	ENSP00000475794.1	ENSP00000489231.1	ENSP00000489144.1	ENSP00000489103.1	ENSP00000486942.1	ENSP00000481168.1	ENSP00000487524.1	ENSP00000487070.1	ENSP00000486407.1 ENSPSIP00000011169.1 gopAga1_00019914-RA	gopAga1_00017550-RA	gopAga1_00013840-RA
OG0000142 XP_014456584.1	XP_006266335.1	XP_006261359.2	XP_014453751.1	XP_014453753.1	XP_014453752.1	XP_006266334.1	XP_014460024.1 ENSACAP00000015759.3	ENSACAP00000001377.3	ENSACAP00000006472.3	ENSACAP00000009783.3 XP_008171029.1	XP_005313880.2	XP_005288568.1	XP_005288570.1	XP_005288569.1	XP_008172809.1	XP_005309733.1 ENSGALP00000004472.4	ENSGALP00000014160.3	ENSGALP00000013560.4 ENSP00000363296.4	ENSP00000437925.1	ENSP00000373986.3	ENSP00000373987.4	ENSP00000351142.3	ENSP00000344173.2	ENSP00000419832.1	ENSP00000437730.1	ENSP00000398456.2	ENSP00000440556.1	ENSP00000363292.3	ENSP00000477466.1	ENSP00000384585.4	ENSP00000417536.1	ENSP00000350348.4	ENSP00000419835.1	ENSP00000231188.5	ENSP00000430767.1	ENSP00000412329.3	ENSP00000409790.3 ENSPSIP00000015027.1	ENSPSIP00000016424.1	ENSPSIP00000010301.1	ENSPSIP00000006672.1 gopAga1_00010151-RA	gopAga1_00001472-RA
OG0000143 XP_014449930.1	XP_006261613.2 ENSACAP00000009875.2 XP_008165720.1	XP_008165721.1	XP_008165719.1 ENSGALP00000003813.3 ENSP00000482966.1	ENSP00000477738.2	ENSP00000480906.1	ENSP00000475824.1	ENSP00000479279.1	ENSP00000475331.1	ENSP00000486268.1	ENSP00000480541.1	ENSP00000478274.1	ENSP00000485595.1	ENSP00000370083.4	ENSP00000428128.1	ENSP00000422679.2	ENSP00000424926.1	ENSP00000430657.1	ENSP00000305857.5	ENSP00000486539.1	ENSP00000487015.1	ENSP00000483768.1	ENSP00000486030.1	ENSP00000487421.1	ENSP00000481427.1	ENSP00000482226.1	ENSP00000483819.1	ENSP00000485830.1	ENSP00000487193.1	ENSP00000486022.1	ENSP00000486152.1	ENSP00000424799.1	ENSP00000370119.4	ENSP00000487029.1	ENSP00000487206.1	ENSP00000487162.1	ENSP00000487186.1	ENSP00000370118.4	ENSP00000485777.1	ENSP00000477720.2	ENSP00000483515.1	ENSP00000479920.1	ENSP00000370117.5 ENSPSIP00000016587.1
OG0000144 XP_014456888.1	XP_014456889.1	XP_006264028.1	XP_006263956.1	XP_014456885.1	XP_014456884.1	XP_014456886.1	XP_006263955.1	XP_014455572.1 ENSACAP00000012527.3	ENSACAP00000010722.3	ENSACAP00000009938.3 XP_005285178.1	XP_005285177.1	XP_005285179.1	XP_008166879.1	XP_005285676.1	XP_008166881.1	XP_008166880.1	XP_005278573.1	XP_005278572.1	XP_005278571.1	XP_005278570.1	XP_005285672.1	XP_005285671.1	XP_005285670.1 ENSGALP00000020041.4	ENSGALP00000008411.3	ENSGALP00000039533.2 ENSP00000380878.3	ENSP00000378323.3	ENSP00000353881.5	ENSP00000320580.6	ENSP00000378322.4	ENSP00000343147.3	ENSP00000289963.8	ENSP00000240139.5	ENSP00000422990.1	ENSP00000378305.2	ENSP00000378306.2 ENSPSIP00000018423.1	ENSPSIP00000018397.1	ENSPSIP00000020444.1	ENSPSIP00000011904.1	ENSPSIP00000020447.1	ENSPSIP00000011914.1 gopAga1_00001760-RC	gopAga1_00001760-RB
OG0000145 XP_014465814.1	XP_014460609.1	XP_014460610.1	XP_014460611.1	XP_006263989.2	XP_006263988.2	XP_006275089.1 ENSACAP00000010823.1	ENSACAP00000013846.2	ENSACAP00000011597.3 XP_008169590.1	XP_005285597.1	XP_005285598.1	XP_005308893.1	XP_005279336.1	XP_005285599.1	XP_005285600.1 ENSGALP00000009110.4	ENSGALP00000026458.4 ENSP00000431038.1	ENSP00000429404.1	ENSP00000367078.2	ENSP00000404687.1	ENSP00000430773.1	ENSP00000429197.1	ENSP00000429359.1	ENSP00000263334.6	ENSP00000452489.2	ENSP00000396259.1	ENSP00000429637.1	ENSP00000429291.1	ENSP00000263335.7	ENSP00000314750.5	ENSP00000380768.3	ENSP00000412188.1	ENSP00000395498.3	ENSP00000350844.4	ENSP00000367084.2	ENSP00000367071.2	ENSP00000367083.2	ENSP00000398652.1	ENSP00000355069.4	ENSP00000359319.3	ENSP00000347385.2 ENSPSIP00000003355.1	ENSPSIP00000009462.1 gopAga1_00014706-RA	gopAga1_00009445-RA
OG0000146 XP_014459271.1	XP_006267029.1	XP_014459279.1 ENSACAP00000003008.2	ENSACAP00000016101.1 XP_008167218.1	XP_005288663.1	XP_005298277.1	XP_008167217.1	XP_008167216.1	XP_008167215.1	XP_008170247.1	XP_008170246.1 ENSGALP00000006947.4	ENSGALP00000010805.2 ENSP00000303909.5	ENSP00000484899.2	ENSP00000480982.2	ENSP00000486868.1	ENSP00000486137.1	ENSP00000487391.1	ENSP00000484030.1	ENSP00000481740.1	ENSP00000478880.1	ENSP00000487341.1	ENSP00000487454.1	ENSP00000480343.1	ENSP00000442048.2	ENSP00000459553.1	ENSP00000461795.1	ENSP00000461565.1	ENSP00000291107.2	ENSP00000445198.2	ENSP00000437429.2	ENSP00000486511.1	ENSP00000303507.8	ENSP00000352535.3	ENSP00000483168.1	ENSP00000486214.1	ENSP00000479455.1	ENSP00000486789.1 ENSPSIP00000008057.1	ENSPSIP00000008091.1	ENSPSIP00000006915.1 gopAga1_00001286-RA	gopAga1_00001287-RA	gopAga1_00001527-RB	gopAga1_00001527-RA
OG0000147 XP_006269409.2	XP_006269408.2	XP_006269412.2	XP_014457107.1	XP_014457106.1	XP_006269410.2	XP_006269411.2	XP_014457103.1	XP_014457105.1	XP_014457104.1 ENSACAP00000000820.3	ENSACAP00000010404.2 XP_008167142.1	XP_008167141.1	XP_008167140.1	XP_008161289.1	XP_008167138.1	XP_005297378.2	XP_005297377.2	XP_005297379.2	XP_008167137.1	XP_008167139.1 ENSGALP00000034555.2	ENSGALP00000026539.4	ENSGALP00000000832.3 ENSP00000437269.1	ENSP00000431470.1	ENSP00000354370.3	ENSP00000326746.6	ENSP00000433099.1	ENSP00000338173.5	ENSP00000385992.1	ENSP00000409905.1	ENSP00000362847.2	ENSP00000257075.5	ENSP00000400141.2	ENSP00000435825.1	ENSP00000362852.3	ENSP00000433850.1	ENSP00000391723.2	ENSP00000362846.4	ENSP00000401777.2	ENSP00000436921.1 ENSPSIP00000015986.1	ENSPSIP00000012921.1	ENSPSIP00000015982.1 gopAga1_00004897-RA	gopAga1_00004896-RA
OG0000148 XP_014455491.1	XP_006273374.2 XP_005279422.1	XP_008174420.1	XP_008174415.1	XP_005279419.2	XP_008174414.1	XP_008171096.1	XP_008171095.1 ENSGALP00000012460.4 ENSP00000350423.6	ENSP00000375767.3	ENSP00000442029.2	ENSP00000262467.5	ENSP00000460475.1	ENSP00000269280.4	ENSP00000460216.1	ENSP00000346390.3	ENSP00000391248.2	ENSP00000429741.1	ENSP00000430460.1	ENSP00000429839.1	ENSP00000428736.1	ENSP00000427858.1	ENSP00000478516.1	ENSP00000428883.1	ENSP00000428662.1	ENSP00000324366.3	ENSP00000483359.1	ENSP00000430057.1	ENSP00000430495.1	ENSP00000484692.1	ENSP00000430747.1 ENSPSIP00000017204.1	ENSPSIP00000015286.1	ENSPSIP00000017834.1	ENSPSIP00000015251.1	ENSPSIP00000015207.1 gopAga1_00018822-RA	gopAga1_00016216-RB	gopAga1_00016217-RA	gopAga1_00016216-RA	gopAga1_00019638-RA	gopAga1_00016374-RC	gopAga1_00017867-RA	gopAga1_00017866-RA	gopAga1_00016374-RB	gopAga1_00016374-RA
OG0000149 XP_014456722.1	XP_014459938.1	XP_006277214.2	XP_006277216.1	XP_014450028.1 ENSACAP00000006471.2 XP_005295132.2	XP_008171309.1	XP_008171293.1	XP_005295122.1	XP_008171354.1	XP_008171359.1	XP_008171294.1	XP_008171295.1	XP_005295125.1	XP_008171310.1	XP_008171311.1 ENSGALP00000038571.2	ENSGALP00000042975.1 ENSP00000418840.1	ENSP00000477841.1	ENSP00000420329.2	ENSP00000410890.1	ENSP00000418666.1	ENSP00000367291.1	ENSP00000395007.2	ENSP00000345140.3 ENSPSIP00000002524.1	ENSPSIP00000002417.1	ENSPSIP00000002437.1	ENSPSIP00000002458.1	ENSPSIP00000002806.1	ENSPSIP00000002556.1	ENSPSIP00000002570.1 gopAga1_00010047-RC	gopAga1_00010042-RA	gopAga1_00010048-RA	gopAga1_00010046-RA	gopAga1_00010047-RB	gopAga1_00010047-RA	gopAga1_00017285-RA	gopAga1_00018243-RA	gopAga1_00016484-RA	gopAga1_00016485-RA	gopAga1_00019815-RA	gopAga1_00010042-RB	gopAga1_00010043-RA	gopAga1_00010043-RB
OG0000150 XP_014449947.1	XP_014449946.1 ENSACAP00000004113.3 XP_005308909.1	XP_005308910.1	XP_005308906.1	XP_005308907.1	XP_005308904.1	XP_005308905.1	XP_005308902.1	XP_005308903.1	XP_005308911.1	XP_005308912.1	XP_008172392.1	XP_008172390.1	XP_008172391.1	XP_005308901.1	XP_005308914.1	XP_005308913.1	XP_005308917.1	XP_005308915.1	XP_005308919.1	XP_005308918.1	XP_005308921.1	XP_005308920.1	XP_005308923.1	XP_008172387.1	XP_008172386.1	XP_005308922.1	XP_008172389.1	XP_008172388.1 ENSGALP00000025647.4 ENSP00000385649.3	ENSP00000428328.1	ENSP00000430359.1	ENSP00000264839.7	ENSP00000430932.1	ENSP00000430408.1	ENSP00000430502.1	ENSP00000428417.1	ENSP00000430101.1	ENSP00000488393.1	ENSP00000428367.1	ENSP00000389503.2	ENSP00000411235.2 ENSPSIP00000002239.1	ENSPSIP00000002240.1 gopAga1_00001119-RA
OG0000151 XP_014450149.1	XP_014450150.1 ENSACAP00000010302.3	ENSACAP00000018851.1 XP_008164569.1	XP_008164568.1	XP_008164567.1	XP_008164565.1	XP_008164564.1	XP_008164563.1	XP_005293959.1	XP_005293958.1	XP_005293946.1	XP_008164570.1	XP_005293956.1	XP_005293957.1	XP_005293950.1	XP_005293951.1	XP_005293948.1	XP_005293949.1	XP_005293954.1	XP_005293955.1	XP_005293952.1	XP_005293953.1 ENSGALP00000032466.3	ENSGALP00000014420.4 ENSP00000358402.1	ENSP00000358404.4	ENSP00000440547.2	ENSP00000347949.4	ENSP00000443626.2	ENSP00000358396.1	ENSP00000277945.7	ENSP00000358393.1	ENSP00000435694.1	ENSP00000446238.2	ENSP00000348274.4	ENSP00000486891.1	ENSP00000344823.5	ENSP00000298692.4	ENSP00000487507.1	ENSP00000444972.2	ENSP00000446172.1	ENSP00000443883.2 ENSPSIP00000020365.1	ENSPSIP00000020356.1 gopAga1_00008095-RA	gopAga1_00008095-RB
OG0000152 XP_014452719.1	XP_014452718.1	XP_014452721.1	XP_014452723.1	XP_014452720.1	XP_014452714.1	XP_014452715.1	XP_014452716.1	XP_014452717.1	XP_014456868.1 ENSACAP00000007046.3	ENSACAP00000005026.3 XP_008161606.1	XP_008161605.1	XP_008161609.1	XP_008161608.1	XP_005300693.1	XP_005300694.1	XP_005300695.1	XP_008168707.1	XP_008168709.1	XP_005300696.1	XP_005300697.1	XP_005303869.1	XP_005303870.1 ENSGALP00000024592.4	ENSGALP00000013649.4 ENSP00000371303.4	ENSP00000334779.4	ENSP00000353253.4	ENSP00000353446.4	ENSP00000380129.2	ENSP00000416016.1	ENSP00000486357.1	ENSP00000371309.1	ENSP00000400887.1	ENSP00000308773.10	ENSP00000422525.1	ENSP00000313070.8	ENSP00000482907.1	ENSP00000351126.3 ENSPSIP00000007328.1	ENSPSIP00000007333.1	ENSPSIP00000010602.1	ENSPSIP00000010604.1 gopAga1_00015471-RA	gopAga1_00015471-RB	gopAga1_00002497-RA
OG0000153 XP_014454360.1	XP_014454359.1	XP_014454362.1	XP_014466949.1	XP_014464637.1 ENSACAP00000009766.2 XP_008175731.1	XP_008174817.1	XP_005310247.1	XP_008170949.1	XP_005312777.2	XP_008176453.1	XP_008175667.1	XP_005312489.1	XP_005315213.1	XP_005312779.1	XP_008176444.1	XP_008176445.1	XP_008176443.1	XP_008176248.1	XP_005313950.1 ENSGALP00000041629.1	ENSGALP00000001779.4	ENSGALP00000039526.1	ENSGALP00000039538.1	ENSGALP00000041805.1 ENSP00000395968.1	ENSP00000403386.1	ENSP00000356037.3	ENSP00000356026.3	ENSP00000356025.3	ENSP00000356024.3 ENSPSIP00000003889.1	ENSPSIP00000004037.1	ENSPSIP00000003836.1	ENSPSIP00000003833.1 gopAga1_00019690-RA	gopAga1_00020168-RA	gopAga1_00018059-RA	gopAga1_00019690-RB	gopAga1_00002253-RC	gopAga1_00002253-RB	gopAga1_00002253-RD	gopAga1_00002253-RA	gopAga1_00002252-RA	gopAga1_00014968-RB	gopAga1_00014968-RA	gopAga1_00018058-RA
OG0000154 ENSACAP00000006318.3	ENSACAP00000006330.2	ENSACAP00000005390.2	ENSACAP00000005400.2	ENSACAP00000002837.2	ENSACAP00000007669.2	ENSACAP00000020100.2	ENSACAP00000020939.1	ENSACAP00000010715.2	ENSACAP00000006952.2	ENSACAP00000019752.1	ENSACAP00000019553.1	ENSACAP00000009432.2	ENSACAP00000009449.2	ENSACAP00000021217.1	ENSACAP00000007265.2	ENSACAP00000009420.2	ENSACAP00000013649.2	ENSACAP00000019427.1	ENSACAP00000009445.2	ENSACAP00000002849.2	ENSACAP00000010703.2	ENSACAP00000002784.3	ENSACAP00000009457.3	ENSACAP00000002789.2	ENSACAP00000010735.2	ENSACAP00000018686.1	ENSACAP00000007861.2	ENSACAP00000017249.2	ENSACAP00000020579.1	ENSACAP00000010842.2	ENSACAP00000007876.2	ENSACAP00000017251.2	ENSACAP00000017254.2	ENSACAP00000017245.2	ENSACAP00000009484.2	ENSACAP00000017239.2	ENSACAP00000022708.1	ENSACAP00000017243.2	ENSACAP00000010766.2	ENSACAP00000009438.2	ENSACAP00000017238.2	ENSACAP00000017244.2	ENSACAP00000010796.2 XP_008172627.1	XP_005284316.1 ENSPSIP00000004386.1 gopAga1_00018001-RA
OG0000155 ENSACAP00000020748.1	ENSACAP00000021869.1	ENSACAP00000018532.1 ENSGALP00000036265.2	ENSGALP00000023738.4	ENSGALP00000036257.2 ENSP00000488741.1	ENSP00000374891.2	ENSP00000374887.3	ENSP00000374922.3	ENSP00000374921.3	ENSP00000374920.2	ENSP00000479267.1	ENSP00000374883.3	ENSP00000374916.3	ENSP00000488057.1	ENSP00000479511.2	ENSP00000488043.1	ENSP00000487891.1	ENSP00000480928.2	ENSP00000488127.1	ENSP00000487798.1	ENSP00000488756.1	ENSP00000488123.1	ENSP00000481327.1	ENSP00000374899.2	ENSP00000374923.2	ENSP00000488603.1	ENSP00000374876.2	ENSP00000488969.1	ENSP00000488870.1	ENSP00000374894.3	ENSP00000488335.1	ENSP00000488280.1	ENSP00000404652.2	ENSP00000487807.1	ENSP00000374896.2	ENSP00000488035.1	ENSP00000488274.1 ENSPSIP00000001009.1	ENSPSIP00000001016.1 gopAga1_00013997-RA	gopAga1_00013999-RA	gopAga1_00013998-RA	gopAga1_00017176-RA	gopAga1_00017177-RA	gopAga1_00013995-RA	gopAga1_00013996-RA
OG0000156 ENSP00000404318.2	ENSP00000410383.1	ENSP00000392833.1	ENSP00000414163.1	ENSP00000405806.1	ENSP00000448232.2	ENSP00000408831.1	ENSP00000447771.2	ENSP00000397642.1	ENSP00000373060.4	ENSP00000396121.1	ENSP00000392784.1	ENSP00000405991.1	ENSP00000390040.1	ENSP00000405350.1	ENSP00000393886.1	ENSP00000387706.1	ENSP00000394074.1	ENSP00000397126.1	ENSP00000400305.1	ENSP00000415212.2	ENSP00000413610.1	ENSP00000387429.2	ENSP00000365588.3	ENSP00000398151.1	ENSP00000390489.1	ENSP00000449936.2	ENSP00000411310.1	ENSP00000408962.1	ENSP00000400979.1	ENSP00000396124.1	ENSP00000396484.2	ENSP00000409167.2	ENSP00000396989.1	ENSP00000448066.2	ENSP00000404954.1	ENSP00000391230.1	ENSP00000397021.1	ENSP00000407703.1	ENSP00000447883.2	ENSP00000416511.2	ENSP00000398474.1	ENSP00000450002.2	ENSP00000388355.1	ENSP00000396389.1	ENSP00000447851.2	ENSP00000387743.1	ENSP00000483601.1
OG0000157 XP_014451184.1	XP_006257905.1 ENSACAP00000005637.3 XP_005289368.1 ENSP00000372919.2	ENSP00000482951.1	ENSP00000396772.2	ENSP00000391038.1	ENSP00000365025.2	ENSP00000365042.2	ENSP00000365046.4	ENSP00000415615.2	ENSP00000415303.2	ENSP00000390900.2	ENSP00000395546.2	ENSP00000478227.1	ENSP00000390345.2	ENSP00000410802.1	ENSP00000395275.1	ENSP00000480787.1	ENSP00000393756.1	ENSP00000413092.2	ENSP00000407018.2	ENSP00000484115.1	ENSP00000365040.2	ENSP00000412520.1	ENSP00000382980.1	ENSP00000365026.2	ENSP00000477593.1	ENSP00000382984.3	ENSP00000372923.2	ENSP00000372925.4	ENSP00000392194.2	ENSP00000407379.1	ENSP00000409510.1	ENSP00000400188.2	ENSP00000415237.2	ENSP00000410942.2	ENSP00000389767.1	ENSP00000484705.1	ENSP00000413469.1	ENSP00000411322.1	ENSP00000407844.1	ENSP00000407864.1	ENSP00000394855.1 ENSPSIP00000007483.1 gopAga1_00014217-RA
OG0000158 XP_014464265.1	XP_006261300.1 ENSACAP00000001807.2 XP_005296809.1	XP_005296810.1	XP_005296811.1	XP_008164220.1 ENSGALP00000016477.4 ENSP00000366559.6	ENSP00000481300.1	ENSP00000479332.1	ENSP00000481598.1	ENSP00000480203.1	ENSP00000484719.1	ENSP00000481705.1	ENSP00000420033.1	ENSP00000419839.1	ENSP00000417466.1	ENSP00000420326.1	ENSP00000405076.2	ENSP00000366617.5	ENSP00000366609.6	ENSP00000323433.10	ENSP00000483870.1	ENSP00000482821.1	ENSP00000371885.4	ENSP00000393105.1	ENSP00000411906.2	ENSP00000353295.6	ENSP00000366612.4	ENSP00000397999.2	ENSP00000371842.3	ENSP00000482804.1	ENSP00000480837.1	ENSP00000484049.1	ENSP00000366608.4	ENSP00000401079.2	ENSP00000478349.1	ENSP00000401945.3	ENSP00000259199.4	ENSP00000348915.4	ENSP00000366666.3 ENSPSIP00000019523.1	ENSPSIP00000019519.1 gopAga1_00003404-RA	gopAga1_00003404-RB	gopAga1_00003405-RA
OG0000159 XP_006274776.1	XP_006266606.1	XP_006277097.1	XP_006277096.1	XP_006277099.1	XP_006277098.1	XP_014451497.1	XP_014451491.1	XP_014466256.1	XP_006261644.2	XP_014451485.1	XP_014459599.1	XP_014463697.1 ENSACAP00000017391.3	ENSACAP00000015348.3	ENSACAP00000016238.2 XP_008174989.1	XP_005309913.1	XP_005309911.1	XP_005307621.1	XP_005307622.1	XP_005307623.1	XP_008162044.1	XP_005309912.1 ENSGALP00000010520.4	ENSGALP00000020445.4	ENSGALP00000023352.3 ENSP00000458731.1	ENSP00000269243.4	ENSP00000300036.5	ENSP00000369315.5	ENSP00000407821.2	ENSP00000216181.5	ENSP00000379616.3	ENSP00000478092.1	ENSP00000353590.3	ENSP00000488461.1	ENSP00000478109.1	ENSP00000478816.1 ENSPSIP00000015204.1	ENSPSIP00000013051.1	ENSPSIP00000003722.1	ENSPSIP00000003721.1	ENSPSIP00000015287.1 gopAga1_00015561-RA	gopAga1_00012374-RA	gopAga1_00006675-RA
OG0000160 XP_014466961.1	XP_014450701.1	XP_006264993.1	XP_006264994.2 ENSACAP00000023170.1	ENSACAP00000018190.1	ENSACAP00000001201.3	ENSACAP00000021924.1 XP_005291145.1	XP_005291143.1	XP_005291144.1	XP_008176121.1 ENSGALP00000040748.1	ENSGALP00000042280.1	ENSGALP00000030165.2	ENSGALP00000025978.1 ENSP00000488121.1	ENSP00000488891.1	ENSP00000482517.1	ENSP00000488443.1	ENSP00000488421.1	ENSP00000488556.1	ENSP00000488115.1	ENSP00000487664.1	ENSP00000427915.1	ENSP00000430131.1	ENSP00000292494.6	ENSP00000414307.2	ENSP00000428572.1	ENSP00000428169.1	ENSP00000488627.1	ENSP00000488559.1	ENSP00000487700.1	ENSP00000428467.1	ENSP00000428159.1	ENSP00000430796.1	ENSP00000430700.1	ENSP00000428442.1 ENSPSIP00000007665.1	ENSPSIP00000001824.1	ENSPSIP00000007613.1 gopAga1_00018905-RA	gopAga1_00018744-RA	gopAga1_00018743-RA	gopAga1_00016145-RA	gopAga1_00016298-RA	gopAga1_00016144-RA
OG0000161 XP_014456612.1	XP_014456566.1	XP_014456565.1	XP_014456564.1	XP_014456563.1	XP_014456562.1	XP_014456560.1	XP_006267589.2	XP_006267590.2	XP_006267591.2	XP_014456611.1	XP_014456610.1	XP_014456561.1	XP_006272914.2 ENSACAP00000008012.2	ENSACAP00000017657.3 XP_008170774.1	XP_008170779.1	XP_005303605.1	XP_008170766.1	XP_005285813.1 ENSGALP00000002335.3	ENSGALP00000039408.2	ENSGALP00000015265.4 ENSP00000402934.1	ENSP00000358680.1	ENSP00000265437.5	ENSP00000377092.2	ENSP00000377097.3	ENSP00000377095.1	ENSP00000325673.3	ENSP00000377093.4	ENSP00000436544.1	ENSP00000358683.1	ENSP00000353972.4	ENSP00000350734.4	ENSP00000436499.1	ENSP00000417140.1	ENSP00000345312.7	ENSP00000377090.3	ENSP00000411118.1	ENSP00000414031.1	ENSP00000377089.1 ENSPSIP00000018278.1	ENSPSIP00000018281.1	ENSPSIP00000003860.1 gopAga1_00009812-RA
OG0000162 XP_014455998.1	XP_014455999.1	XP_014456004.1	XP_014456005.1	XP_014450224.1	XP_014450223.1	XP_014448975.1	XP_014448974.1	XP_014448976.1	XP_006269137.1	XP_006269136.2 ENSACAP00000004288.2	ENSACAP00000004292.2	ENSACAP00000004291.3	ENSACAP00000004294.2	ENSACAP00000004290.2	ENSACAP00000004301.2	ENSACAP00000022702.1	ENSACAP00000021717.1	ENSACAP00000021785.1	ENSACAP00000023317.1 XP_008175736.1	XP_008175735.1	XP_005313633.1	XP_008175400.1	XP_008175401.1	XP_005313558.1	XP_005312346.1 ENSGALP00000042474.1 ENSP00000469886.1	ENSP00000457623.1	ENSP00000457369.1	ENSP00000479240.1	ENSP00000456310.1 ENSPSIP00000008764.1	ENSPSIP00000006980.1	ENSPSIP00000018103.1	ENSPSIP00000017744.1	ENSPSIP00000017735.1	ENSPSIP00000013036.1	ENSPSIP00000018011.1 gopAga1_00016785-RA	gopAga1_00018398-RA	gopAga1_00018396-RA	gopAga1_00018397-RA	gopAga1_00016784-RB	gopAga1_00016784-RA
OG0000163 XP_014456715.1	XP_006270342.1	XP_014461121.1	XP_014453369.1	XP_006270329.1	XP_014453370.1	XP_014453368.1 ENSACAP00000022817.1	ENSACAP00000006716.3	ENSACAP00000021443.1 XP_008174576.1	XP_008174403.1	XP_005315085.1	XP_008176054.1	XP_008174581.1	XP_008175546.1	XP_008176297.1	XP_008176196.1	XP_008175484.1	XP_005314350.1	XP_005312571.1	XP_005314574.1 ENSGALP00000042552.1	ENSGALP00000001014.4	ENSGALP00000035062.2	ENSGALP00000042271.1 ENSP00000437168.2	ENSP00000359497.3	ENSP00000359504.4	ENSP00000434282.1	ENSP00000359488.3	ENSP00000359512.4	ENSP00000455317.1	ENSP00000415087.1	ENSP00000454978.1	ENSP00000235878.5	ENSP00000403010.1	ENSP00000294671.2	ENSP00000359485.4	ENSP00000359490.5 gopAga1_00018076-RA	gopAga1_00017310-RA	gopAga1_00017311-RA	gopAga1_00018724-RA	gopAga1_00018723-RA	gopAga1_00019529-RA	gopAga1_00019528-RA
OG0000164 XP_006276821.1	XP_006276819.1	XP_014459534.1	XP_014459533.1	XP_014459530.1	XP_014459531.1 ENSACAP00000016470.2	ENSACAP00000016476.3 XP_005313280.1	XP_005313674.2	XP_005313279.1	XP_005313281.1	XP_005281424.1	XP_005281423.1	XP_005313282.1	XP_005313283.1 ENSP00000470113.1	ENSP00000473047.1	ENSP00000324269.6	ENSP00000471636.1	ENSP00000314783.4	ENSP00000469315.1	ENSP00000470783.1	ENSP00000413958.2	ENSP00000324414.3	ENSP00000375680.2	ENSP00000470574.1	ENSP00000375684.1	ENSP00000291726.8	ENSP00000375682.1	ENSP00000472016.1	ENSP00000341555.3	ENSP00000156499.2	ENSP00000375678.1 ENSPSIP00000004841.1	ENSPSIP00000006406.1	ENSPSIP00000002100.1	ENSPSIP00000002094.1	ENSPSIP00000007526.1	ENSPSIP00000002090.1 gopAga1_00002328-RA	gopAga1_00002327-RA	gopAga1_00002329-RA	gopAga1_00002330-RA	gopAga1_00019897-RA	gopAga1_00002325-RA	gopAga1_00002324-RA
OG0000165 XP_014450246.1	XP_014450238.1	XP_014450239.1	XP_014450240.1	XP_014450242.1	XP_014450243.1	XP_014450244.1	XP_014450245.1 ENSACAP00000001428.2 XP_008161813.1	XP_008161811.1	XP_008161810.1	XP_008161815.1	XP_008161814.1	XP_008161795.1	XP_008161794.1	XP_008161797.1	XP_008161796.1	XP_008161793.1	XP_008161800.1	XP_008161801.1	XP_008161802.1	XP_008161803.1	XP_008161804.1	XP_008161805.1	XP_008161806.1	XP_008161807.1	XP_008161808.1	XP_008161809.1	XP_008161812.1	XP_008161799.1	XP_008161798.1 ENSGALP00000007101.3 ENSP00000439093.1	ENSP00000437786.1	ENSP00000445531.1	ENSP00000303585.7	ENSP00000351665.2	ENSP00000355314.4	ENSP00000438743.1	ENSP00000441409.1	ENSP00000479322.1	ENSP00000446379.1 ENSPSIP00000012704.1	ENSPSIP00000012721.1 gopAga1_00013418-RA	gopAga1_00013418-RB
OG0000166 XP_014466009.1	XP_014466010.1	XP_014452331.1	XP_014463728.1	XP_014463729.1	XP_014463730.1	XP_014463731.1	XP_014463732.1	XP_014462721.1 ENSACAP00000015284.3	ENSACAP00000014240.2	ENSACAP00000016313.3	ENSACAP00000012759.3 XP_005302082.1	XP_005302084.1	XP_005281570.1	XP_005302083.1	XP_005281569.1	XP_005284598.1 ENSGALP00000000497.4	ENSGALP00000011476.4	ENSGALP00000026406.4	ENSGALP00000018680.4 ENSP00000386050.3	ENSP00000432281.1	ENSP00000435412.1	ENSP00000368884.3	ENSP00000487553.1	ENSP00000487166.1	ENSP00000483896.1	ENSP00000363283.2	ENSP00000363281.4	ENSP00000431651.1	ENSP00000262752.2	ENSP00000422484.1	ENSP00000265678.4	ENSP00000487349.1	ENSP00000486031.1	ENSP00000486881.1 ENSPSIP00000019951.1	ENSPSIP00000003202.1	ENSPSIP00000010613.1	ENSPSIP00000007261.1	ENSPSIP00000010627.1 gopAga1_00006348-RA	gopAga1_00004811-RB	gopAga1_00004811-RA
OG0000167 XP_014454419.1	XP_014454420.1 ENSACAP00000004055.2 XP_008160817.1	XP_008160814.1	XP_008160815.1	XP_008160812.1	XP_008160813.1	XP_008160810.1	XP_008160811.1	XP_008160787.1	XP_008160798.1	XP_008160799.1	XP_008160795.1	XP_008160796.1	XP_008160797.1	XP_008160790.1	XP_008160791.1	XP_008160793.1	XP_008160792.1	XP_008160809.1	XP_008160808.1	XP_008160789.1	XP_008160788.1	XP_008160801.1	XP_008160800.1	XP_008160803.1	XP_008160802.1	XP_008160804.1	XP_008160807.1	XP_008160806.1 ENSGALP00000011899.4 ENSP00000391269.4	ENSP00000450031.1	ENSP00000448496.1	ENSP00000446842.1	ENSP00000447753.1	ENSP00000347855.4	ENSP00000458748.1	ENSP00000344196.4	ENSP00000447281.1	ENSP00000447717.1	ENSP00000402745.2	ENSP00000309117.5	ENSP00000484837.1	ENSP00000450402.1 ENSPSIP00000007059.1
OG0000168 XP_014457043.1	XP_014458531.1	XP_014458520.1	XP_014458530.1	XP_014457044.1	XP_014457056.1	XP_014454954.1	XP_014454953.1	XP_014454952.1 ENSACAP00000011236.3	ENSACAP00000016033.2	ENSACAP00000001029.3 XP_005282486.1	XP_005282485.1	XP_008167855.1	XP_005290540.1	XP_008167862.1	XP_008167865.1	XP_008169093.1 ENSGALP00000017690.4	ENSGALP00000017711.4	ENSGALP00000014451.4	ENSGALP00000014477.4	ENSGALP00000037427.2 ENSP00000265724.3	ENSP00000478255.1	ENSP00000263817.6	ENSP00000398692.1	ENSP00000392983.1	ENSP00000265723.4	ENSP00000352135.3	ENSP00000351172.3	ENSP00000394511.1	ENSP00000258738.6	ENSP00000384881.2	ENSP00000444095.1 ENSPSIP00000008285.1	ENSPSIP00000016915.1	ENSPSIP00000006666.1	ENSPSIP00000016899.1	ENSPSIP00000009214.1 gopAga1_00010599-RA	gopAga1_00016653-RA	gopAga1_00005111-RA	gopAga1_00019894-RA	gopAga1_00009997-RA	gopAga1_00009998-RA
OG0000169 XP_014455905.1	XP_014455907.1	XP_014455906.1	XP_014461687.1	XP_014461686.1	XP_014455912.1	XP_014455908.1	XP_014455910.1	XP_014455911.1	XP_014461690.1	XP_014461688.1	XP_014461689.1 ENSACAP00000007459.3	ENSACAP00000006754.3 XP_008171428.1	XP_008171429.1	XP_008171439.1	XP_008171438.1	XP_008168909.1	XP_008168908.1	XP_008168907.1	XP_008168906.1	XP_008171437.1	XP_008171436.1	XP_008171435.1	XP_008171434.1	XP_008171433.1	XP_008171432.1	XP_008171431.1	XP_008171430.1	XP_008168911.1	XP_008168910.1 ENSGALP00000014211.4	ENSGALP00000042945.1	ENSGALP00000027129.4 ENSP00000388190.2	ENSP00000414131.2	ENSP00000364758.3	ENSP00000364754.3	ENSP00000380212.2	ENSP00000364747.4 ENSPSIP00000019701.1	ENSPSIP00000019026.1 gopAga1_00012318-RA	gopAga1_00012318-RC	gopAga1_00012318-RB	gopAga1_00012318-RD
OG0000170 XP_014456912.1	XP_014456908.1	XP_014456896.1	XP_014456897.1	XP_014456894.1	XP_014456895.1	XP_014456892.1	XP_014456890.1	XP_014456891.1	XP_014456910.1	XP_014456911.1	XP_014456905.1	XP_014456904.1	XP_014456903.1	XP_014456902.1	XP_014456901.1	XP_014456900.1	XP_014456899.1	XP_014456898.1	XP_014456907.1	XP_014456906.1 XP_008169637.1	XP_008169638.1	XP_008169634.1	XP_008169635.1	XP_008169636.1	XP_008169630.1	XP_008169631.1	XP_008169632.1	XP_008169633.1	XP_005285686.1	XP_005285682.1	XP_005285683.1	XP_005285684.1	XP_005285685.1	XP_008169629.1 ENSP00000355136.3	ENSP00000277982.5	ENSP00000360291.2	ENSP00000360293.2	ENSP00000360292.2	ENSP00000302556.6	ENSP00000360295.2	ENSP00000360271.3	ENSP00000360285.1	ENSP00000277984.4	ENSP00000360283.1
OG0000171 XP_014464463.1	XP_014464462.1	XP_014464460.1	XP_006258459.2	XP_006258458.2	XP_014464467.1	XP_014464466.1	XP_014464468.1	XP_014464469.1	XP_014464470.1	XP_014464465.1	XP_014464464.1 ENSACAP00000008503.2	ENSACAP00000018961.1 XP_008161061.1	XP_008161060.1	XP_008161065.1	XP_008161067.1	XP_008161066.1	XP_008161069.1	XP_008161063.1	XP_005302853.1	XP_005302851.1	XP_008161057.1	XP_008161058.1	XP_008161059.1	XP_008161070.1	XP_008161071.1	XP_008161062.1	XP_008161068.1	XP_008161064.1 ENSGALP00000012584.4 ENSP00000365645.1	ENSP00000365639.4	ENSP00000365637.3	ENSP00000379723.1	ENSP00000379722.1	ENSP00000365634.2	ENSP00000404798.1	ENSP00000302343.6	ENSP00000392625.1	ENSP00000489575.1	ENSP00000389680.3	ENSP00000365635.3 ENSPSIP00000012129.1	ENSPSIP00000012121.1
OG0000172 XP_006265080.1	XP_014466873.1	XP_014466874.1	XP_006258968.2	XP_014461918.1	XP_014461919.1	XP_006265079.2	XP_014453149.1	XP_014461920.1 ENSACAP00000005953.3	ENSACAP00000007952.3	ENSACAP00000014128.3	ENSACAP00000005057.3 XP_005285232.1	XP_005300336.1	XP_005300335.1	XP_005300334.1	XP_005310515.2	XP_005305357.1 ENSGALP00000030863.3	ENSGALP00000024993.4	ENSGALP00000012219.4	ENSGALP00000017035.4 ENSP00000399970.2	ENSP00000377935.4	ENSP00000370113.3	ENSP00000377936.1	ENSP00000425247.1	ENSP00000377933.3	ENSP00000325074.7	ENSP00000398779.2	ENSP00000336591.6	ENSP00000421396.1	ENSP00000423649.1	ENSP00000335083.5	ENSP00000377931.4	ENSP00000431320.1	ENSP00000372042.4	ENSP00000422374.1 ENSPSIP00000008718.1	ENSPSIP00000008720.1	ENSPSIP00000018547.1	ENSPSIP00000018145.1	ENSPSIP00000018148.1	ENSPSIP00000018883.1 gopAga1_00010358-RA
OG0000173 XP_014449300.1	XP_014449301.1	XP_014463763.1	XP_006259103.1	XP_006271168.1	XP_006271170.1 ENSACAP00000023193.1	ENSACAP00000005713.1	ENSACAP00000011991.3 XP_005294492.1	XP_005314808.1	XP_005294495.1	XP_005294493.1	XP_008175946.1	XP_008171665.1 ENSGALP00000041979.1 ENSP00000479722.1	ENSP00000359716.3	ENSP00000479339.1	ENSP00000481980.1	ENSP00000378315.2	ENSP00000399326.1	ENSP00000397175.1	ENSP00000359714.1	ENSP00000378314.3	ENSP00000392275.1	ENSP00000393654.1	ENSP00000359723.2	ENSP00000359722.3	ENSP00000390906.1	ENSP00000401252.2	ENSP00000359719.3	ENSP00000359718.1	ENSP00000309591.3	ENSP00000468352.1	ENSP00000466651.1	ENSP00000466289.1 ENSPSIP00000007634.1	ENSPSIP00000007617.1	ENSPSIP00000014927.1 gopAga1_00007112-RC	gopAga1_00019829-RA	gopAga1_00007112-RA	gopAga1_00020055-RA	gopAga1_00007621-RA	gopAga1_00019818-RA
OG0000174 XP_014466866.1	XP_014458082.1	XP_014458083.1	XP_014458084.1	XP_006259803.1	XP_006276702.1 ENSACAP00000016877.3	ENSACAP00000001480.3 XP_008171821.1	XP_008169578.1	XP_005290185.1	XP_005278703.1	XP_005278704.1 ENSGALP00000018940.3	ENSGALP00000038058.2 ENSP00000424853.1	ENSP00000411904.1	ENSP00000421394.1	ENSP00000478878.1	ENSP00000412806.1	ENSP00000454172.1	ENSP00000452884.1	ENSP00000453261.1	ENSP00000454166.1	ENSP00000454075.1	ENSP00000453483.1	ENSP00000427966.1	ENSP00000455883.1	ENSP00000452826.1	ENSP00000380211.2	ENSP00000454192.1	ENSP00000454093.1	ENSP00000427561.1	ENSP00000425506.1	ENSP00000268720.5	ENSP00000431863.1	ENSP00000317374.8	ENSP00000440077.1	ENSP00000421705.1	ENSP00000421646.1	ENSP00000423811.1 ENSPSIP00000013883.1	ENSPSIP00000018742.1	ENSPSIP00000003019.1 gopAga1_00001634-RA	gopAga1_00001633-RA
OG0000175 XP_014456792.1	XP_014465734.1	XP_014465732.1	XP_006270167.1	XP_006264286.1	XP_006260762.1	XP_014465735.1 ENSACAP00000009792.3	ENSACAP00000002423.3	ENSACAP00000004048.3	ENSACAP00000003909.3	ENSACAP00000023081.1 XP_005289566.1	XP_005308679.1	XP_005308682.1	XP_005308680.1	XP_005293229.1	XP_005293230.1	XP_005293231.1	XP_008173572.1	XP_005311178.1	XP_005311177.1	XP_005311180.1	XP_005311179.1	XP_005311182.1	XP_005311181.1	XP_005308681.1 ENSGALP00000020403.3	ENSGALP00000016312.4	ENSGALP00000042757.1 ENSP00000345985.6	ENSP00000466989.1	ENSP00000248668.4	ENSP00000298119.4	ENSP00000246529.3 ENSPSIP00000014715.1	ENSPSIP00000019196.1	ENSPSIP00000019184.1	ENSPSIP00000009274.1	ENSPSIP00000009360.1	ENSPSIP00000009781.1 gopAga1_00016332-RA	gopAga1_00018761-RA	gopAga1_00006025-RA	gopAga1_00011809-RA	gopAga1_00015450-RA
OG0000176 XP_014460492.1	XP_006275875.2	XP_006261096.1	XP_006271226.1 ENSACAP00000020361.2	ENSACAP00000023034.1	ENSACAP00000001574.2 XP_008167143.1	XP_008176821.1	XP_008176820.1	XP_008167144.1	XP_005309608.1	XP_005309607.1	XP_005288161.1	XP_005288160.1	XP_005288159.1	XP_005280248.1	XP_005280249.1	XP_005280247.1	XP_005280250.1	XP_008176819.1	XP_005286272.1 ENSGALP00000033347.3	ENSGALP00000042863.1	ENSGALP00000031103.3	ENSGALP00000000843.4 ENSP00000359340.3	ENSP00000359336.1	ENSP00000362841.2	ENSP00000429073.1	ENSP00000429393.1	ENSP00000440287.2	ENSP00000357402.1	ENSP00000357401.1	ENSP00000433225.1	ENSP00000473611.1	ENSP00000437798.2	ENSP00000359330.2 ENSPSIP00000017609.1	ENSPSIP00000014360.1	ENSPSIP00000014630.1	ENSPSIP00000016952.1	ENSPSIP00000016977.1	ENSPSIP00000014376.1 gopAga1_00003669-RA	gopAga1_00014060-RA
OG0000177 XP_006269366.1	XP_014465476.1	XP_006262268.1	XP_014453251.1	XP_006264765.2 ENSACAP00000005484.2	ENSACAP00000005477.2	ENSACAP00000007719.2	ENSACAP00000007717.2	ENSACAP00000005479.2	ENSACAP00000020665.1	ENSACAP00000017880.2	ENSACAP00000021477.1	ENSACAP00000007734.2 XP_008172901.1	XP_005284275.1	XP_005284274.1	XP_005284301.1	XP_005311837.1	XP_005311838.1	XP_005284298.1	XP_008174052.1	XP_005315306.1	XP_005311845.1	XP_005311842.1	XP_005311821.1	XP_005311844.1 ENSGALP00000031533.2	ENSGALP00000040224.1	ENSGALP00000033366.2 ENSP00000336762.6	ENSP00000381077.4 ENSPSIP00000000336.1	ENSPSIP00000000734.1 gopAga1_00015984-RA	gopAga1_00015985-RA	gopAga1_00015987-RA	gopAga1_00019438-RA	gopAga1_00018773-RA	gopAga1_00018774-RA	gopAga1_00017518-RA	gopAga1_00016555-RA	gopAga1_00016040-RA	gopAga1_00015986-RA	gopAga1_00018775-RA	gopAga1_00016554-RA
OG0000178 XP_014455537.1	XP_014459652.1	XP_006262468.2	XP_006262469.1	XP_006262467.1	XP_006262488.1	XP_014455538.1	XP_014455539.1 ENSACAP00000001642.2	ENSACAP00000017900.2	ENSACAP00000022240.1	ENSACAP00000008839.3	ENSACAP00000008668.2	ENSACAP00000008814.2 XP_005313584.1	XP_005313580.1	XP_005313581.1	XP_005313582.1	XP_005313583.1	XP_008175416.1	XP_005313577.1	XP_008175411.1	XP_008175410.1	XP_008175413.1	XP_008175415.1	XP_008175414.1 ENSGALP00000026283.2	ENSGALP00000026289.3	ENSGALP00000026285.1	ENSGALP00000026286.2	ENSGALP00000030998.3 ENSP00000482006.1	ENSP00000360002.4	ENSP00000335620.5	ENSP00000211122.3	ENSP00000481135.1	ENSP00000284562.2	ENSP00000360028.1	ENSP00000359998.1	ENSP00000420168.1 ENSPSIP00000017363.1	ENSPSIP00000017029.1	ENSPSIP00000017089.1	ENSPSIP00000017663.1 gopAga1_00014673-RA	gopAga1_00014672-RA
OG0000179 XP_014466982.1	XP_014452794.1	XP_014452795.1	XP_014453851.1 ENSACAP00000002143.3	ENSACAP00000010390.3	ENSACAP00000004898.2	ENSACAP00000005978.2 XP_008167149.1	XP_008163383.1	XP_008163382.1	XP_008163387.1	XP_008163386.1	XP_008163385.1	XP_008163384.1	XP_008178121.1	XP_008178120.1	XP_008173910.1	XP_008178118.1	XP_008178117.1	XP_008178119.1 ENSGALP00000026436.4	ENSGALP00000043245.1	ENSGALP00000002622.4	ENSGALP00000026250.4	ENSGALP00000042572.1 ENSP00000338769.3	ENSP00000488953.1	ENSP00000488946.1	ENSP00000429900.1	ENSP00000429391.1	ENSP00000350297.2	ENSP00000281419.3	ENSP00000316404.4	ENSP00000429829.1	ENSP00000408826.2 ENSPSIP00000019494.1	ENSPSIP00000014460.1	ENSPSIP00000019076.1	ENSPSIP00000008663.1 gopAga1_00011576-RA	gopAga1_00005295-RA	gopAga1_00011575-RA	gopAga1_00012449-RB	gopAga1_00012449-RA	gopAga1_00005296-RA
OG0000180 XP_014456480.1 ENSACAP00000008751.2 XP_008175225.1 ENSGALP00000040419.1	ENSGALP00000000221.4 ENSP00000390848.1	ENSP00000389736.1	ENSP00000391352.1	ENSP00000405746.1	ENSP00000398332.1	ENSP00000413062.2	ENSP00000394737.1	ENSP00000406776.1	ENSP00000410329.1	ENSP00000413471.2	ENSP00000393646.2	ENSP00000414153.1	ENSP00000410077.1	ENSP00000399130.2	ENSP00000410609.1	ENSP00000412457.1	ENSP00000399759.1	ENSP00000394789.2	ENSP00000378723.3	ENSP00000410908.1	ENSP00000372718.2	ENSP00000402800.2	ENSP00000399634.1	ENSP00000401587.1	ENSP00000408453.2	ENSP00000398843.1	ENSP00000398890.2	ENSP00000411276.1	ENSP00000405790.1	ENSP00000401238.1	ENSP00000416157.2	ENSP00000391679.1	ENSP00000393285.1	ENSP00000394997.2	ENSP00000414817.2	ENSP00000412415.1	ENSP00000411321.2	ENSP00000396075.2	ENSP00000404072.1 gopAga1_00018431-RB	gopAga1_00018431-RA
OG0000181 XP_006269372.1	XP_006258077.1	XP_014459364.1	XP_014452420.1	XP_014455576.1 ENSACAP00000008836.2	ENSACAP00000009429.2	ENSACAP00000022654.1	ENSACAP00000007171.2	ENSACAP00000002707.2 XP_005312828.1	XP_005312829.1	XP_005304886.1	XP_008171913.1	XP_008165136.1	XP_008165135.1	XP_008165134.1 ENSGALP00000005587.3	ENSGALP00000020395.4	ENSGALP00000036575.2	ENSGALP00000011213.4 ENSP00000318557.3	ENSP00000380819.2	ENSP00000290209.5	ENSP00000346112.3	ENSP00000454168.1	ENSP00000489285.1	ENSP00000264930.5	ENSP00000461403.1	ENSP00000438334.2	ENSP00000387725.2	ENSP00000380814.2	ENSP00000452776.1	ENSP00000453473.1	ENSP00000387694.1	ENSP00000243964.3	ENSP00000428854.2	ENSP00000485792.1	ENSP00000482242.1 ENSPSIP00000019136.1	ENSPSIP00000018829.1	ENSPSIP00000009914.1	ENSPSIP00000009981.1 gopAga1_00007819-RA	gopAga1_00011762-RA
OG0000182 XP_014452648.1	XP_014452651.1	XP_014452650.1	XP_014452649.1	XP_014452643.1	XP_014452644.1	XP_014452646.1	XP_014452647.1	XP_006260414.2 ENSACAP00000006856.3 XP_008169905.1	XP_008169907.1	XP_005295019.1	XP_005295018.1	XP_008169908.1 ENSGALP00000011843.4 ENSP00000436543.1	ENSP00000434808.1	ENSP00000354907.5	ENSP00000354785.6	ENSP00000354823.4	ENSP00000436323.1	ENSP00000409930.2	ENSP00000403518.2	ENSP00000434017.1	ENSP00000433334.1	ENSP00000437327.1	ENSP00000433276.1	ENSP00000435494.1	ENSP00000435266.1	ENSP00000434949.1	ENSP00000351527.6	ENSP00000437156.1	ENSP00000432075.1	ENSP00000436744.1	ENSP00000432243.1	ENSP00000435379.1	ENSP00000413586.2	ENSP00000432041.1	ENSP00000435789.1	ENSP00000382004.4 ENSPSIP00000019421.1 gopAga1_00016559-RC	gopAga1_00016559-RA	gopAga1_00016559-RB
OG0000183 XP_006276481.1	XP_006276482.1	XP_006276486.1	XP_006276485.1	XP_006276484.1	XP_006276483.1 ENSACAP00000004148.2 XP_005279698.2 ENSGALP00000000211.4 ENSP00000475691.1	ENSP00000399009.1	ENSP00000416399.1	ENSP00000391246.2	ENSP00000363958.4	ENSP00000411195.1	ENSP00000436322.1	ENSP00000363964.4	ENSP00000405634.1	ENSP00000412885.1	ENSP00000449380.2	ENSP00000449609.1	ENSP00000405050.1	ENSP00000410994.1	ENSP00000404221.1	ENSP00000382443.1	ENSP00000435693.1	ENSP00000382444.1	ENSP00000411074.1	ENSP00000382445.3	ENSP00000401791.2	ENSP00000391758.1	ENSP00000372588.2	ENSP00000434978.1	ENSP00000414641.1	ENSP00000402220.1	ENSP00000409145.2	ENSP00000409613.1	ENSP00000378702.1	ENSP00000406118.1	ENSP00000413845.1	ENSP00000400737.1	ENSP00000405661.1	ENSP00000400369.1	ENSP00000390267.1 gopAga1_00018912-RA
OG0000184 XP_006277707.1 ENSACAP00000015899.2 XP_008174326.1 ENSP00000481639.1	ENSP00000484239.1	ENSP00000484865.1	ENSP00000484555.1	ENSP00000483436.1	ENSP00000478203.1	ENSP00000481374.1	ENSP00000478451.1	ENSP00000481068.1	ENSP00000482513.1	ENSP00000483266.1	ENSP00000477913.1	ENSP00000480503.1	ENSP00000483157.1	ENSP00000482084.1	ENSP00000484465.1	ENSP00000484694.1	ENSP00000479654.1	ENSP00000480899.1	ENSP00000477766.1	ENSP00000482527.1	ENSP00000480422.1	ENSP00000479563.1	ENSP00000478622.1	ENSP00000481608.1	ENSP00000400743.1	ENSP00000379671.2	ENSP00000379667.1	ENSP00000305524.4	ENSP00000408689.1	ENSP00000397402.3	ENSP00000478156.1	ENSP00000484225.1	ENSP00000482737.1	ENSP00000479576.1	ENSP00000480964.1	ENSP00000481573.1	ENSP00000483220.1	ENSP00000484964.1	ENSP00000478751.1	ENSP00000479105.1 gopAga1_00017575-RA
OG0000185 XP_014450337.1	XP_014450344.1 ENSACAP00000001931.2 XP_008166642.1	XP_008166643.1	XP_008166640.1	XP_008166641.1	XP_008166646.1	XP_008166647.1	XP_008166644.1	XP_008166645.1	XP_008166664.1	XP_008166665.1	XP_008166648.1	XP_008166667.1	XP_008166660.1	XP_008166662.1	XP_008166663.1	XP_008166649.1	XP_008166661.1	XP_008166668.1	XP_008166655.1	XP_008166654.1	XP_008166657.1	XP_008166656.1	XP_008166651.1	XP_008166650.1	XP_008166653.1	XP_008166652.1	XP_008166659.1	XP_008166658.1	XP_008166670.1	XP_008166639.1	XP_008166638.1	XP_008166666.1	XP_008166637.1	XP_008166636.1	XP_008166635.1	XP_008166669.1 ENSGALP00000021860.4 ENSP00000284776.7	ENSP00000347852.5	ENSP00000397482.1 ENSPSIP00000012543.1 gopAga1_00005942-RA
OG0000186 XP_014450418.1	XP_014450419.1	XP_014450420.1	XP_014450421.1	XP_014450422.1 ENSACAP00000020102.2 XP_008168769.1	XP_008168767.1	XP_008168766.1	XP_008168765.1	XP_008168764.1	XP_008168763.1	XP_008168762.1	XP_008168761.1	XP_008168760.1	XP_005300661.1	XP_005300654.1	XP_008168757.1	XP_008168774.1	XP_008168775.1	XP_008168758.1	XP_008168759.1	XP_008168770.1	XP_008168771.1	XP_008168772.1	XP_008168773.1 ENSGALP00000023016.4 ENSP00000421656.1	ENSP00000427311.1	ENSP00000425222.1	ENSP00000424645.1	ENSP00000424825.1	ENSP00000427045.1	ENSP00000316891.7	ENSP00000424437.1	ENSP00000422864.1	ENSP00000423355.1	ENSP00000379840.3	ENSP00000371172.4	ENSP00000421242.1	ENSP00000426334.1	ENSP00000411020.2	ENSP00000425631.1 ENSPSIP00000005008.1 gopAga1_00001387-RA
OG0000187 XP_014456313.1	XP_014456314.1 ENSACAP00000003874.2 XP_008175228.1 ENSP00000414631.1	ENSP00000408141.1	ENSP00000412100.2	ENSP00000392842.2	ENSP00000409144.1	ENSP00000404018.2	ENSP00000398728.1	ENSP00000398742.2	ENSP00000409734.2	ENSP00000390001.2	ENSP00000415844.1	ENSP00000405637.1	ENSP00000410591.2	ENSP00000412550.1	ENSP00000405208.2	ENSP00000394366.2	ENSP00000402739.2	ENSP00000398951.2	ENSP00000400783.1	ENSP00000408520.1	ENSP00000403906.2	ENSP00000414016.2	ENSP00000414945.2	ENSP00000389962.2	ENSP00000395349.2	ENSP00000372715.4	ENSP00000395056.1	ENSP00000372717.4	ENSP00000395579.1	ENSP00000407198.2	ENSP00000411774.1	ENSP00000399386.1	ENSP00000407671.1	ENSP00000399032.2	ENSP00000378714.3	ENSP00000363976.4	ENSP00000378716.3	ENSP00000372714.4	ENSP00000409668.1	ENSP00000403122.1 gopAga1_00018432-RA
OG0000188 XP_014459759.1 ENSACAP00000002350.3 XP_008177683.1	XP_008177682.1	XP_008177681.1	XP_008177680.1	XP_005297892.1	XP_005297893.1	XP_005297894.1	XP_005297895.1	XP_005297886.1	XP_005297887.1	XP_005297889.1	XP_005297890.1	XP_005297898.1	XP_005297899.1	XP_005297905.1	XP_005297904.1	XP_005297901.1	XP_005297900.1	XP_005297903.1	XP_005297902.1	XP_005297884.1	XP_005297883.1 ENSGALP00000012015.4 ENSP00000489105.1	ENSP00000489513.1	ENSP00000489393.1	ENSP00000420796.1	ENSP00000424369.1	ENSP00000420323.1	ENSP00000418862.2	ENSP00000477591.1	ENSP00000480920.1	ENSP00000489326.1	ENSP00000489444.1	ENSP00000331157.7	ENSP00000489580.1	ENSP00000489391.1	ENSP00000385450.2	ENSP00000418177.2	ENSP00000489478.1	ENSP00000489322.1 ENSPSIP00000017785.1 gopAga1_00006134-RA
OG0000189 XP_014460538.1	XP_014460537.1	XP_014460497.1 ENSACAP00000005098.2 XP_008165348.1	XP_008165347.1	XP_005315482.2	XP_005298447.1	XP_005298448.1 ENSGALP00000034408.2 ENSP00000482521.1	ENSP00000483954.1	ENSP00000354736.6	ENSP00000342513.4	ENSP00000487181.1	ENSP00000482635.1	ENSP00000483498.1	ENSP00000478718.1	ENSP00000486608.1	ENSP00000376824.3	ENSP00000451851.1	ENSP00000485767.1	ENSP00000238609.3	ENSP00000480235.1	ENSP00000487394.1	ENSP00000451459.1	ENSP00000452226.1	ENSP00000451717.1	ENSP00000484970.1	ENSP00000487242.1	ENSP00000477753.1	ENSP00000482832.1	ENSP00000483430.1	ENSP00000485930.1	ENSP00000355152.4	ENSP00000484089.1	ENSP00000483291.1	ENSP00000450620.1	ENSP00000486224.1	ENSP00000483932.1	ENSP00000451608.1	ENSP00000487453.1 ENSPSIP00000012680.1 gopAga1_00014949-RA	gopAga1_00017504-RA
OG0000190 XP_006274188.1	XP_006257885.1	XP_006275418.1	XP_014465426.1	XP_014449620.1	XP_006275415.1	XP_006275417.1	XP_006275416.1	XP_014449608.1	XP_014449596.1 ENSACAP00000006182.3	ENSACAP00000015542.3 XP_008172828.1	XP_008172826.1	XP_005279216.1	XP_005309784.1	XP_005309782.1	XP_005309781.1	XP_005309780.1	XP_005309371.1 ENSGALP00000026752.3	ENSGALP00000015730.2	ENSGALP00000011690.3 ENSP00000405754.2	ENSP00000370209.1	ENSP00000370213.4	ENSP00000478336.1	ENSP00000424540.3	ENSP00000365276.3	ENSP00000365256.3	ENSP00000365259.3	ENSP00000304257.2	ENSP00000425323.1	ENSP00000424603.1	ENSP00000261514.5	ENSP00000353857.3 ENSPSIP00000014344.1	ENSPSIP00000013656.1	ENSPSIP00000013703.1	ENSPSIP00000008737.1 gopAga1_00008550-RA	gopAga1_00017085-RB	gopAga1_00017085-RA	gopAga1_00001683-RA
OG0000191 XP_014454100.1	XP_014454163.1	XP_014454162.1	XP_006259547.1	XP_014454214.1	XP_014454227.1	XP_014454155.1 ENSACAP00000006504.3	ENSACAP00000006897.2	ENSACAP00000006459.2	ENSACAP00000006462.2	ENSACAP00000019055.2	ENSACAP00000006452.3 XP_005314707.2	XP_005284944.1	XP_008166203.1	XP_005285000.1	XP_005285001.1	XP_005285002.1 ENSGALP00000017026.4	ENSGALP00000017031.4 ENSP00000360971.4	ENSP00000360972.1	ENSP00000479019.1	ENSP00000360987.4	ENSP00000360958.3	ENSP00000294337.3	ENSP00000484629.1	ENSP00000271153.4	ENSP00000311095.4	ENSP00000360991.4 ENSPSIP00000014477.1	ENSPSIP00000013419.1	ENSPSIP00000003009.1	ENSPSIP00000003004.1	ENSPSIP00000015126.1	ENSPSIP00000003005.1	ENSPSIP00000003049.1	ENSPSIP00000012031.1	ENSPSIP00000013644.1	ENSPSIP00000003075.1 gopAga1_00013454-RA	gopAga1_00013453-RA	gopAga1_00016471-RA
OG0000192 XP_014459727.1	XP_014459726.1	XP_006260802.1	XP_006263477.1	XP_006274919.1	XP_006274918.1	XP_014452779.1	XP_014465322.1	XP_006263866.1 ENSACAP00000014669.3	ENSACAP00000017128.2	ENSACAP00000016685.3	ENSACAP00000003000.2 XP_005296695.1	XP_005279920.1	XP_005312877.1	XP_005294984.1	XP_005279918.1	XP_008164023.1 ENSGALP00000022686.2	ENSGALP00000011140.2	ENSGALP00000043468.1 ENSP00000308495.3	ENSP00000358548.4	ENSP00000480317.1	ENSP00000488296.1	ENSP00000488757.1	ENSP00000488225.1	ENSP00000256078.4	ENSP00000480686.1	ENSP00000388246.1	ENSP00000407586.1	ENSP00000434023.1	ENSP00000309845.7	ENSP00000380722.1	ENSP00000380723.2	ENSP00000482366.1 ENSPSIP00000004046.1	ENSPSIP00000016513.1	ENSPSIP00000016956.1	ENSPSIP00000016964.1 gopAga1_00017144-RA	gopAga1_00012256-RA	gopAga1_00014298-RA
OG0000193 XP_014458375.1	XP_014461290.1	XP_006262135.1	XP_014461288.1	XP_014461289.1	XP_006275597.1	XP_014452014.1	XP_006275596.1	XP_006275598.1 ENSACAP00000001338.3 XP_008165370.1	XP_008165372.1	XP_008165368.1	XP_005298486.1	XP_008163253.1	XP_005298485.1	XP_008163250.1	XP_008163251.1	XP_008163252.1	XP_005298487.1	XP_008165369.1 ENSGALP00000001105.5	ENSGALP00000032335.3 ENSP00000418956.1	ENSP00000419952.1	ENSP00000400285.1	ENSP00000473602.1	ENSP00000374283.4	ENSP00000367337.1	ENSP00000367332.1	ENSP00000484368.1	ENSP00000305858.8	ENSP00000374285.5	ENSP00000367323.3	ENSP00000396167.2	ENSP00000164247.1	ENSP00000340824.1	ENSP00000318772.1 ENSPSIP00000006157.1	ENSPSIP00000006562.1	ENSPSIP00000006553.1 gopAga1_00010892-RA	gopAga1_00005264-RA	gopAga1_00019936-RA
OG0000194 XP_006271050.2	XP_006270957.1	XP_006262542.1	XP_006270956.1	XP_006270958.1	XP_006262543.1 ENSACAP00000011596.3	ENSACAP00000002429.3	ENSACAP00000016503.3 XP_008167632.1	XP_005307473.1	XP_005307474.1	XP_005307471.1	XP_008171868.1	XP_005290048.1	XP_005290047.1 ENSGALP00000015304.4	ENSGALP00000015306.3	ENSGALP00000027694.3	ENSGALP00000035654.2	ENSGALP00000013849.4	ENSGALP00000013848.3	ENSGALP00000038049.2 ENSP00000446440.2	ENSP00000481875.1	ENSP00000478489.1	ENSP00000481554.1	ENSP00000376835.2	ENSP00000426845.1	ENSP00000377403.2	ENSP00000296526.7	ENSP00000435775.1	ENSP00000432180.1	ENSP00000264426.9	ENSP00000282499.5	ENSP00000318144.6 ENSPSIP00000014727.1	ENSPSIP00000014738.1	ENSPSIP00000012199.1	ENSPSIP00000012189.1	ENSPSIP00000017871.1	ENSPSIP00000017886.1 gopAga1_00006866-RA	gopAga1_00011350-RA
OG0000195 XP_014450402.1	XP_014450400.1	XP_014450401.1	XP_014450398.1	XP_014450399.1	XP_006263627.1 ENSACAP00000004767.3	ENSACAP00000006199.2 XP_005299122.1	XP_005299117.1	XP_008161766.1	XP_008165841.1	XP_008161723.1	XP_008161760.1	XP_008161728.1	XP_008161773.1	XP_008165864.1	XP_008165867.1	XP_008161770.1	XP_008165862.1	XP_008161745.1	XP_008165840.1	XP_008161792.1	XP_008161731.1	XP_008161735.1	XP_008161782.1	XP_008161780.1	XP_008161786.1	XP_008165854.1	XP_008161752.1	XP_008165851.1	XP_008165831.1	XP_008165835.1	XP_005286678.1 ENSGALP00000022788.4	ENSGALP00000027526.4 ENSP00000426064.1	ENSP00000369600.4	ENSP00000421584.1	ENSP00000351113.4	ENSP00000445043.2 ENSPSIP00000017468.1	ENSPSIP00000011572.1 gopAga1_00008106-RA
OG0000196 XP_006263897.1	XP_006263898.1	XP_014456701.1 ENSACAP00000017533.3	ENSACAP00000009380.3 XP_008165729.1	XP_005288291.1	XP_005288295.1	XP_008169836.1	XP_008165735.1	XP_008165734.1	XP_008165737.1	XP_008165736.1	XP_008165731.1	XP_008165730.1	XP_008165733.1	XP_008165732.1 ENSGALP00000037700.2 ENSP00000470495.1	ENSP00000470511.1	ENSP00000470730.1	ENSP00000473001.1	ENSP00000470493.1	ENSP00000469075.1	ENSP00000426842.2	ENSP00000287761.6	ENSP00000473173.1	ENSP00000473169.1	ENSP00000469511.1	ENSP00000471935.1	ENSP00000471563.1	ENSP00000469425.1	ENSP00000427296.1	ENSP00000393776.2	ENSP00000470568.1	ENSP00000252771.7	ENSP00000472417.1	ENSP00000470578.1	ENSP00000472623.1	ENSP00000470731.1 ENSPSIP00000016089.1 gopAga1_00001829-RA	gopAga1_00002160-RA	gopAga1_00001829-RB
OG0000197 XP_006278104.1	XP_006268557.1	XP_014462988.1 ENSACAP00000008357.2	ENSACAP00000004388.3	ENSACAP00000009964.2	ENSACAP00000015444.2	ENSACAP00000018610.1	ENSACAP00000018903.1 XP_005311525.1	XP_005311526.1	XP_005283790.1	XP_005305566.1	XP_008163943.1	XP_005311900.1 ENSGALP00000039444.2	ENSGALP00000042446.1	ENSGALP00000016260.3 ENSP00000315299.1	ENSP00000387065.1	ENSP00000375785.2	ENSP00000291295.8	ENSP00000451062.1	ENSP00000411440.1	ENSP00000472141.1	ENSP00000470502.1	ENSP00000471225.1	ENSP00000468877.1	ENSP00000403491.3	ENSP00000450829.1	ENSP00000272298.7	ENSP00000349467.4	ENSP00000442853.2 ENSPSIP00000014748.1	ENSPSIP00000006167.1	ENSPSIP00000001417.1	ENSPSIP00000017318.1	ENSPSIP00000017304.1	ENSPSIP00000017528.1	ENSPSIP00000020358.1 gopAga1_00001846-RA	gopAga1_00003827-RA	gopAga1_00015477-RA	gopAga1_00010518-RA
OG0000198 XP_006268561.2	XP_006268562.2 ENSACAP00000018534.1 XP_005279384.1	XP_005279383.1 ENSP00000449307.2	ENSP00000383265.1	ENSP00000448377.2	ENSP00000448115.2	ENSP00000449611.2	ENSP00000365752.3	ENSP00000422442.1	ENSP00000449255.2	ENSP00000449238.2	ENSP00000407699.2	ENSP00000401397.1	ENSP00000400393.1	ENSP00000415730.2	ENSP00000416183.1	ENSP00000397769.1	ENSP00000383261.1	ENSP00000383262.1	ENSP00000365751.2	ENSP00000405039.1	ENSP00000372868.2	ENSP00000414285.1	ENSP00000391805.1	ENSP00000401208.1	ENSP00000383336.1	ENSP00000259875.7	ENSP00000416145.2	ENSP00000405540.1	ENSP00000383339.1	ENSP00000383334.1	ENSP00000383338.1	ENSP00000427552.1	ENSP00000383337.3	ENSP00000365753.3	ENSP00000365754.4	ENSP00000406091.2	ENSP00000318217.8	ENSP00000449190.2	ENSP00000447474.2 gopAga1_00019107-RA
OG0000199 XP_006271145.1	XP_006271148.1	XP_006271147.1	XP_014461107.1	XP_006278517.2	XP_014461108.1	XP_006271146.1	XP_006271143.1	XP_006271144.1	XP_014454884.1	XP_014454882.1	XP_014454883.1 ENSACAP00000012073.3	ENSACAP00000007047.3 XP_008171504.1	XP_008171503.1	XP_008171502.1	XP_008171501.1	XP_008171500.1	XP_005307760.1	XP_008176609.1	XP_008176608.1	XP_008176607.1	XP_005300509.1 ENSGALP00000042837.1	ENSGALP00000037924.2 ENSP00000448917.1	ENSP00000447260.1	ENSP00000447782.1	ENSP00000448117.1	ENSP00000333504.8	ENSP00000449913.1	ENSP00000341826.6	ENSP00000350090.2	ENSP00000448617.1	ENSP00000408487.1	ENSP00000416340.1	ENSP00000376309.2 ENSPSIP00000004831.1	ENSPSIP00000004825.1	ENSPSIP00000003136.1 gopAga1_00007129-RA	gopAga1_00006208-RA	gopAga1_00006208-RB
OG0000200 XP_014450328.1	XP_006273173.1	XP_014450151.1	XP_014450152.1	XP_014450327.1 ENSACAP00000002577.3	ENSACAP00000012146.3	ENSACAP00000009720.2 XP_005297950.1	XP_005297947.1	XP_005297948.1	XP_005293963.1	XP_005297949.1	XP_008177651.1	XP_008177650.1	XP_005282036.1	XP_005297951.1 ENSGALP00000010722.4	ENSGALP00000017274.3	ENSGALP00000014349.3	ENSGALP00000041770.1 ENSP00000376796.1	ENSP00000413329.1	ENSP00000368546.1	ENSP00000368542.1	ENSP00000346223.4	ENSP00000368548.1	ENSP00000368566.2	ENSP00000281455.2	ENSP00000426150.1	ENSP00000425006.1	ENSP00000346680.4	ENSP00000422607.1	ENSP00000296869.4 ENSPSIP00000018027.1	ENSPSIP00000006282.1	ENSPSIP00000006268.1	ENSPSIP00000018018.1	ENSPSIP00000007455.1 gopAga1_00006306-RA	gopAga1_00007748-RA	gopAga1_00007761-RB	gopAga1_00007761-RA	gopAga1_00007761-RC
OG0000201 XP_014466595.1	XP_014465690.1	XP_014452380.1	XP_014452381.1	XP_014452382.1	XP_014452383.1 ENSACAP00000008770.2	ENSACAP00000018831.1	ENSACAP00000011257.2 XP_008170392.1	XP_005304941.1	XP_005304939.1	XP_005302254.1	XP_008170091.1 ENSGALP00000010524.3	ENSGALP00000000634.4	ENSGALP00000026839.4 ENSP00000444986.2	ENSP00000328213.4	ENSP00000365012.2	ENSP00000362658.2	ENSP00000427757.1	ENSP00000429848.1	ENSP00000486627.1	ENSP00000365022.2	ENSP00000362663.3	ENSP00000434525.1	ENSP00000436554.1	ENSP00000477713.1	ENSP00000441169.1	ENSP00000433663.1	ENSP00000362665.3	ENSP00000435605.1	ENSP00000431517.1	ENSP00000337825.5 ENSPSIP00000003896.1	ENSPSIP00000015268.1	ENSPSIP00000003352.1 gopAga1_00007193-RA	gopAga1_00011043-RA	gopAga1_00000635-RE	gopAga1_00000635-RA	gopAga1_00000635-RB	gopAga1_00000635-RD
OG0000202 XP_014456379.1 ENSACAP00000008452.3 XP_008170555.1	XP_008170554.1	XP_005291419.1	XP_005291418.1	XP_005291421.1	XP_005291420.1	XP_005291422.1	XP_005291410.1	XP_005291411.1	XP_005289342.1	XP_005291409.1	XP_005291414.1	XP_005291415.1	XP_005291412.1	XP_005291413.1	XP_005291416.1	XP_005291417.1 ENSGALP00000012709.4	ENSGALP00000039725.2 ENSP00000479241.1	ENSP00000478072.1	ENSP00000480269.1	ENSP00000479687.1	ENSP00000484481.1	ENSP00000486406.1	ENSP00000484943.1	ENSP00000482852.1	ENSP00000480774.1	ENSP00000482205.1	ENSP00000479353.1	ENSP00000318472.8	ENSP00000384055.3	ENSP00000481083.1	ENSP00000480132.1	ENSP00000477835.1	ENSP00000486241.1	ENSP00000477808.1	ENSP00000480797.1 ENSPSIP00000007171.1	ENSPSIP00000007156.1 gopAga1_00006220-RA	gopAga1_00006221-RA
OG0000203 XP_014461766.1	XP_014461765.1	XP_014465855.1	XP_014465852.1	XP_014459217.1	XP_014459216.1	XP_014459215.1	XP_014459214.1	XP_014459213.1 ENSACAP00000007998.3	ENSACAP00000012167.3 XP_005279641.1	XP_008173656.1	XP_008167689.1	XP_008162503.1	XP_008162502.1	XP_008162500.1	XP_005299525.1	XP_005299524.1	XP_005299527.1	XP_005299526.1	XP_005299523.1	XP_005299528.1	XP_005304397.1	XP_005304400.1	XP_008162499.1 ENSGALP00000003855.5	ENSGALP00000038129.2 ENSP00000294725.8	ENSP00000476657.1	ENSP00000356403.5	ENSP00000417578.3	ENSP00000418003.3	ENSP00000486374.1	ENSP00000417851.2	ENSP00000419086.3	ENSP00000486130.1	ENSP00000486486.1	ENSP00000263604.4	ENSP00000360822.2	ENSP00000419007.3 ENSPSIP00000006881.1	ENSPSIP00000017562.1 gopAga1_00000517-RA
OG0000204 XP_014459424.1	XP_014459427.1	XP_014459431.1	XP_014459430.1	XP_014459429.1	XP_014459428.1	XP_014459425.1	XP_014459426.1	XP_014459420.1	XP_014459421.1	XP_014459422.1	XP_014459423.1 ENSACAP00000005993.3 XP_005291337.1	XP_005291339.1	XP_005291340.1	XP_005291341.1	XP_008172858.1	XP_008172851.1	XP_008172850.1	XP_008172853.1	XP_008172852.1	XP_008172855.1	XP_008172854.1	XP_008172857.1	XP_008172856.1	XP_008172847.1	XP_008172848.1	XP_008172849.1 ENSGALP00000023303.3 ENSP00000438047.1	ENSP00000438555.1	ENSP00000441408.1	ENSP00000437488.1	ENSP00000321650.4	ENSP00000380019.3	ENSP00000354592.3	ENSP00000348018.4	ENSP00000399572.3	ENSP00000412911.2	ENSP00000439736.1 ENSPSIP00000017035.1 gopAga1_00006482-RA	gopAga1_00006481-RA
OG0000205 ENSACAP00000021908.1	ENSACAP00000022520.1	ENSACAP00000021976.1	ENSACAP00000022684.1	ENSACAP00000023003.1	ENSACAP00000022259.1	ENSACAP00000022574.1	ENSACAP00000022200.1	ENSACAP00000022778.1 XP_005303974.1 ENSPSIP00000001215.1	ENSPSIP00000001072.1	ENSPSIP00000000422.1	ENSPSIP00000000985.1	ENSPSIP00000000984.1	ENSPSIP00000000464.1	ENSPSIP00000016047.1	ENSPSIP00000000504.1	ENSPSIP00000000131.1	ENSPSIP00000000236.1	ENSPSIP00000001630.1	ENSPSIP00000001456.1	ENSPSIP00000000605.1	ENSPSIP00000000526.1	ENSPSIP00000000240.1	ENSPSIP00000001786.1	ENSPSIP00000001285.1	ENSPSIP00000001640.1	ENSPSIP00000001280.1	ENSPSIP00000000451.1	ENSPSIP00000001894.1	ENSPSIP00000001322.1	ENSPSIP00000001320.1	ENSPSIP00000001023.1	ENSPSIP00000000332.1	ENSPSIP00000018412.1	ENSPSIP00000000170.1	ENSPSIP00000000046.1	ENSPSIP00000000433.1	ENSPSIP00000000573.1	ENSPSIP00000001717.1	ENSPSIP00000001958.1	ENSPSIP00000001259.1	ENSPSIP00000001111.1
OG0000206 ENSACAP00000019619.1	ENSACAP00000018019.1	ENSACAP00000010398.3 XP_008174140.1	XP_005312945.1	XP_005312944.1	XP_005312943.1	XP_005312942.1	XP_005312947.1	XP_005312946.1	XP_008174947.1	XP_008174943.1	XP_008174942.1	XP_008174948.1	XP_005293989.2	XP_005312949.1	XP_005312948.2	XP_005312950.1	XP_005293985.1 ENSP00000421557.1 ENSPSIP00000000681.1	ENSPSIP00000001692.1	ENSPSIP00000005511.1	ENSPSIP00000001051.1	ENSPSIP00000000171.1	ENSPSIP00000005807.1	ENSPSIP00000019986.1	ENSPSIP00000005587.1	ENSPSIP00000001697.1	ENSPSIP00000003558.1	ENSPSIP00000003563.1	ENSPSIP00000000192.1	ENSPSIP00000005543.1	ENSPSIP00000001754.1	ENSPSIP00000001757.1 gopAga1_00012768-RA	gopAga1_00012762-RA	gopAga1_00012760-RA	gopAga1_00012765-RA	gopAga1_00012769-RA	gopAga1_00012758-RA	gopAga1_00012757-RA	gopAga1_00012761-RA	gopAga1_00016595-RA
OG0000207 XP_008161327.1 ENSPSIP00000001877.1	ENSPSIP00000001213.1	ENSPSIP00000000229.1	ENSPSIP00000001219.1	ENSPSIP00000001595.1	ENSPSIP00000001860.1	ENSPSIP00000000140.1	ENSPSIP00000000708.1	ENSPSIP00000001143.1	ENSPSIP00000000458.1	ENSPSIP00000000622.1	ENSPSIP00000017857.1	ENSPSIP00000000630.1	ENSPSIP00000001351.1	ENSPSIP00000001789.1	ENSPSIP00000001475.1	ENSPSIP00000018439.1	ENSPSIP00000000317.1	ENSPSIP00000001181.1	ENSPSIP00000000141.1	ENSPSIP00000018441.1	ENSPSIP00000001229.1	ENSPSIP00000000991.1	ENSPSIP00000001302.1	ENSPSIP00000000104.1	ENSPSIP00000000618.1	ENSPSIP00000001628.1	ENSPSIP00000001152.1	ENSPSIP00000001157.1	ENSPSIP00000001482.1	ENSPSIP00000000823.1	ENSPSIP00000001889.1	ENSPSIP00000001096.1	ENSPSIP00000001399.1	ENSPSIP00000001541.1	ENSPSIP00000000063.1	ENSPSIP00000001633.1	ENSPSIP00000001409.1	ENSPSIP00000001298.1	ENSPSIP00000000041.1	ENSPSIP00000000044.1	ENSPSIP00000001758.1 gopAga1_00018570-RA
OG0000208 XP_008176362.1 ENSP00000405374.1	ENSP00000409451.1	ENSP00000409810.1	ENSP00000411458.1	ENSP00000411371.1	ENSP00000411865.1	ENSP00000405245.1	ENSP00000405964.1	ENSP00000391480.1	ENSP00000408609.1	ENSP00000414082.1	ENSP00000400556.1	ENSP00000393650.1	ENSP00000398274.1	ENSP00000408191.1	ENSP00000402942.1	ENSP00000396885.1	ENSP00000408067.1	ENSP00000398492.1	ENSP00000413793.1	ENSP00000406006.1	ENSP00000388382.1	ENSP00000405707.1	ENSP00000399841.1	ENSP00000393984.1	ENSP00000391580.1	ENSP00000402876.1	ENSP00000408908.1	ENSP00000409929.1	ENSP00000403593.1	ENSP00000394963.1	ENSP00000407519.1	ENSP00000395105.1	ENSP00000416843.1	ENSP00000409426.1	ENSP00000391441.1	ENSP00000391070.1	ENSP00000388776.1	ENSP00000409162.1	ENSP00000413149.1	ENSP00000405386.1	ENSP00000467040.1	ENSP00000465926.1
OG0000209 XP_014460280.1	XP_014460282.1	NP_001274230.1	XP_006272565.1	XP_006272563.1 ENSACAP00000021404.1	ENSACAP00000000477.2 XP_008174161.1	XP_005302394.1	XP_005302393.1	XP_005312004.1 ENSGALP00000019939.4	ENSGALP00000042528.1 ENSP00000412831.2	ENSP00000465334.2	ENSP00000466207.1	ENSP00000466897.1	ENSP00000466110.1	ENSP00000467734.1	ENSP00000467028.2	ENSP00000467449.1	ENSP00000466712.1	ENSP00000468645.1	ENSP00000486590.1	ENSP00000466238.2	ENSP00000467948.1	ENSP00000468097.1	ENSP00000467848.1	ENSP00000464906.1	ENSP00000466216.1	ENSP00000468788.1	ENSP00000465338.1	ENSP00000468016.1	ENSP00000465779.1	ENSP00000467138.2	ENSP00000467307.1	ENSP00000465558.1	ENSP00000466025.1	ENSP00000322887.4	ENSP00000465077.1 ENSPSIP00000002902.1 gopAga1_00018520-RA	gopAga1_00018520-RB
OG0000210 XP_006273616.1	XP_014461072.1	XP_006273619.2	XP_006266264.1	XP_006266265.2	XP_006258772.1 ENSACAP00000015148.2	ENSACAP00000015151.1	ENSACAP00000012900.3	ENSACAP00000017921.2	ENSACAP00000013069.3 XP_005307064.1	XP_005280569.1	XP_005280568.1	XP_005280570.1	XP_005285790.1	XP_005307065.1	XP_005307060.1	XP_005307061.1	XP_005307062.1 ENSGALP00000027881.2	ENSGALP00000039829.1	ENSGALP00000036471.2	ENSGALP00000039827.2 ENSP00000252321.3	ENSP00000358784.2	ENSP00000487785.1	ENSP00000280684.3	ENSP00000408321.1	ENSP00000433109.1	ENSP00000314520.4	ENSP00000371985.3 ENSPSIP00000017753.1	ENSPSIP00000000243.1	ENSPSIP00000001460.1	ENSPSIP00000000213.1	ENSPSIP00000000196.1	ENSPSIP00000001466.1 gopAga1_00007518-RA	gopAga1_00014330-RA	gopAga1_00015730-RA	gopAga1_00016588-RA	gopAga1_00007519-RA
OG0000211 XP_014453102.1	XP_014463105.1	XP_014466849.1	XP_006265081.2	XP_006264110.1	XP_006264109.1 ENSACAP00000007751.3	ENSACAP00000014954.2	ENSACAP00000006217.3	ENSACAP00000014506.3 XP_005285235.1	XP_005285239.1	XP_008172313.1	XP_005306105.1	XP_005306104.2	XP_005300327.1	XP_005300326.1	XP_005305371.1 ENSGALP00000030864.2	ENSGALP00000024212.3	ENSGALP00000042483.1	ENSGALP00000012246.4	ENSGALP00000036457.1	ENSGALP00000017063.3	ENSGALP00000000304.4 ENSP00000339850.3	ENSP00000309539.5	ENSP00000427985.1	ENSP00000343690.5	ENSP00000425742.1	ENSP00000321606.7	ENSP00000380987.2	ENSP00000431117.1	ENSP00000381526.3 ENSPSIP00000006047.1	ENSPSIP00000014527.1	ENSPSIP00000018201.1	ENSPSIP00000006683.1	ENSPSIP00000006696.1 gopAga1_00010403-RA	gopAga1_00003421-RA	gopAga1_00009450-RA	gopAga1_00007944-RA
OG0000212 XP_006264372.1	XP_006264373.1	XP_006264374.1	XP_014451280.1	XP_014451281.1	XP_014451284.1	XP_014451285.1	XP_014451282.1	XP_014451283.1 ENSACAP00000010442.2	ENSACAP00000014219.3 XP_005280645.1	XP_005280646.1	XP_005280636.1	XP_008170153.1	XP_008170152.1	XP_008170151.1	XP_008170150.1	XP_005280644.1	XP_005280643.1	XP_008170148.1	XP_008170149.1	XP_008170155.1	XP_008170154.1	XP_008170146.1	XP_008170147.1 ENSGALP00000039878.2 ENSP00000389052.1	ENSP00000399920.1	ENSP00000345308.6	ENSP00000478447.1	ENSP00000389445.1	ENSP00000407672.1	ENSP00000398609.1	ENSP00000415310.1	ENSP00000355343.2	ENSP00000357490.1	ENSP00000389717.1	ENSP00000271877.8 ENSPSIP00000019428.1 gopAga1_00004259-RC	gopAga1_00004259-RA	gopAga1_00004259-RB
OG0000213 XP_006272278.1	XP_006273314.2	XP_006271456.1	XP_006266885.1 ENSACAP00000017304.2	ENSACAP00000019260.1	ENSACAP00000017295.2	ENSACAP00000020993.1	ENSACAP00000017997.1	ENSACAP00000018323.1	ENSACAP00000020242.1	ENSACAP00000019940.1 XP_005297843.1	XP_005294852.1	XP_005296265.1	XP_005297845.1	XP_005297844.1	XP_005297847.1	XP_005297846.1	XP_005297848.1 ENSGALP00000032197.2	ENSGALP00000040690.1 ENSP00000369581.2	ENSP00000276943.2	ENSP00000418018.2 ENSPSIP00000001255.1	ENSPSIP00000001022.1	ENSPSIP00000020578.1 gopAga1_00019661-RA	gopAga1_00019660-RA	gopAga1_00018250-RA	gopAga1_00018248-RA	gopAga1_00018249-RA	gopAga1_00011302-RA	gopAga1_00013630-RA	gopAga1_00020016-RA	gopAga1_00019585-RA	gopAga1_00019586-RA	gopAga1_00020097-RA	gopAga1_00019919-RA	gopAga1_00019859-RA	gopAga1_00019860-RA	gopAga1_00010976-RA
OG0000214 XP_006267288.1	XP_014463237.1	XP_014463236.1	XP_006267289.1	XP_014463231.1	XP_014463230.1	XP_014463233.1	XP_014463232.1	XP_014463235.1	XP_014463234.1	XP_014456974.1 ENSACAP00000012144.3	ENSACAP00000008234.3 XP_008172365.1	XP_005289446.1	XP_005289445.1	XP_008172362.1	XP_008172363.1	XP_008172364.1	XP_005296220.1	XP_005296221.1	XP_005296222.1	XP_005296223.1	XP_005296217.1	XP_005296218.1	XP_005296219.1 ENSGALP00000012348.3	ENSGALP00000023335.2	ENSGALP00000036514.2 ENSP00000423963.1	ENSP00000354616.5	ENSP00000422552.1	ENSP00000392089.2	ENSP00000425754.1	ENSP00000424770.1	ENSP00000306772.5	ENSP00000424676.1	ENSP00000421767.1	ENSP00000392466.1 ENSPSIP00000017733.1 gopAga1_00006783-RA	gopAga1_00016136-RA	gopAga1_00006784-RA
OG0000215 XP_006271656.1	XP_006272785.1	XP_006267587.1 ENSACAP00000004229.1	ENSACAP00000002065.2 XP_005287917.1	XP_005287918.1	XP_005301781.1	XP_008168657.1 ENSGALP00000020092.4	ENSGALP00000033525.2 ENSP00000423487.1	ENSP00000426586.1	ENSP00000349722.6	ENSP00000424710.1	ENSP00000222402.2	ENSP00000424359.1	ENSP00000421904.1	ENSP00000425762.1	ENSP00000481600.1	ENSP00000378283.2	ENSP00000344069.8	ENSP00000426620.1	ENSP00000396901.2	ENSP00000378280.4	ENSP00000378282.5	ENSP00000345285.5	ENSP00000318494.7	ENSP00000337208.3	ENSP00000253815.3	ENSP00000381718.4	ENSP00000337262.7	ENSP00000381717.3	ENSP00000429613.1	ENSP00000397406.1	ENSP00000479814.1	ENSP00000363019.3	ENSP00000424941.1	ENSP00000426523.1 ENSPSIP00000015548.1	ENSPSIP00000008172.1 gopAga1_00008666-RA	gopAga1_00008666-RB
OG0000216 XP_014449304.1	XP_014449305.1	XP_014449302.1	XP_014449303.1	XP_006269261.1 ENSACAP00000006570.3 XP_008169457.1	XP_008169456.1	XP_008169459.1	XP_008169458.1	XP_005302419.1	XP_005302418.1	XP_005302420.1	XP_008169470.1	XP_008169471.1	XP_008169472.1	XP_008169468.1	XP_008169469.1	XP_008169466.1	XP_008169467.1	XP_008169464.1	XP_008169465.1	XP_008169462.1	XP_008169463.1	XP_008169460.1	XP_008169461.1 ENSGALP00000037893.2	ENSGALP00000014395.4 ENSP00000359758.1	ENSP00000359763.1	ENSP00000359762.1	ENSP00000359760.1	ENSP00000359765.1	ENSP00000353006.2	ENSP00000359748.1	ENSP00000359750.1	ENSP00000397740.1	ENSP00000322270.6	ENSP00000485786.1	ENSP00000359752.3 ENSPSIP00000018835.1	ENSPSIP00000018844.1 gopAga1_00005209-RA
OG0000217 XP_006275527.2 ENSACAP00000016956.3 XP_008174077.1 ENSP00000395732.1	ENSP00000390961.1	ENSP00000391633.1	ENSP00000403273.1	ENSP00000372873.4	ENSP00000416355.1	ENSP00000411030.1	ENSP00000399313.1	ENSP00000409995.1	ENSP00000403917.1	ENSP00000393409.1	ENSP00000395846.1	ENSP00000393741.1	ENSP00000409375.1	ENSP00000388861.2	ENSP00000415094.1	ENSP00000390909.1	ENSP00000398866.1	ENSP00000390747.1	ENSP00000413293.1	ENSP00000389138.1	ENSP00000396247.1	ENSP00000388032.1	ENSP00000416413.1	ENSP00000391438.2	ENSP00000392683.1	ENSP00000412484.1	ENSP00000373056.4	ENSP00000410658.1	ENSP00000400615.1	ENSP00000395333.1	ENSP00000365569.3	ENSP00000391341.1	ENSP00000412058.1	ENSP00000398834.1	ENSP00000403627.1	ENSP00000407122.1	ENSP00000392736.1	ENSP00000415104.1 gopAga1_00018341-RA
OG0000218 XP_014460500.1	XP_014459651.1	XP_014459332.1	XP_014459333.1 ENSACAP00000004547.3	ENSACAP00000004820.3	ENSACAP00000004011.2	ENSACAP00000005854.2 XP_008161959.1	XP_008165386.1	XP_005287345.1	XP_005287346.1	XP_005289758.1	XP_008166523.1	XP_008166524.1	XP_008166525.1 ENSGALP00000026309.4	ENSGALP00000025911.4	ENSGALP00000004083.4 ENSP00000334828.6	ENSP00000412263.2	ENSP00000345799.3	ENSP00000483463.1	ENSP00000362486.3	ENSP00000362479.4	ENSP00000241312.4	ENSP00000362478.1	ENSP00000383047.3	ENSP00000473617.1	ENSP00000489225.1	ENSP00000430733.1	ENSP00000473359.1	ENSP00000441462.2	ENSP00000297405.5 ENSPSIP00000019566.1	ENSPSIP00000017384.1	ENSPSIP00000019573.1	ENSPSIP00000019254.1	ENSPSIP00000019263.1 gopAga1_00008540-RA	gopAga1_00001953-RA	gopAga1_00001950-RA	gopAga1_00000712-RA
OG0000219 ENSACAP00000018568.1	ENSACAP00000014192.2	ENSACAP00000006408.2	ENSACAP00000020618.1 ENSP00000356849.1	ENSP00000356850.4	ENSP00000404402.1 ENSPSIP00000019441.1	ENSPSIP00000011081.1	ENSPSIP00000016505.1	ENSPSIP00000000881.1	ENSPSIP00000008076.1	ENSPSIP00000010938.1	ENSPSIP00000002526.1	ENSPSIP00000006800.1	ENSPSIP00000018065.1	ENSPSIP00000011334.1	ENSPSIP00000001620.1	ENSPSIP00000006781.1	ENSPSIP00000008104.1	ENSPSIP00000013258.1	ENSPSIP00000013244.1	ENSPSIP00000018401.1	ENSPSIP00000001664.1	ENSPSIP00000017994.1	ENSPSIP00000014888.1	ENSPSIP00000011343.1	ENSPSIP00000015176.1	ENSPSIP00000014516.1	ENSPSIP00000009559.1	ENSPSIP00000006614.1	ENSPSIP00000005424.1	ENSPSIP00000017908.1	ENSPSIP00000001752.1	ENSPSIP00000020369.1	ENSPSIP00000007066.1	ENSPSIP00000012694.1	ENSPSIP00000006826.1	ENSPSIP00000010166.1	ENSPSIP00000001848.1	ENSPSIP00000011949.1	ENSPSIP00000020470.1	ENSPSIP00000019782.1
OG0000220 XP_008175593.1 ENSP00000457979.1	ENSP00000456796.1	ENSP00000457143.1	ENSP00000455553.1	ENSP00000455600.1	ENSP00000454364.1	ENSP00000457307.1	ENSP00000458063.1	ENSP00000454607.1	ENSP00000454263.1	ENSP00000457657.1	ENSP00000455226.1	ENSP00000455074.1	ENSP00000457178.1	ENSP00000454289.1	ENSP00000458087.1	ENSP00000457223.1	ENSP00000456263.1	ENSP00000456362.1	ENSP00000454233.1	ENSP00000456147.1	ENSP00000456632.1	ENSP00000457635.1	ENSP00000457122.1	ENSP00000456787.1	ENSP00000457073.1	ENSP00000456002.1	ENSP00000455965.1	ENSP00000456166.1	ENSP00000455812.1	ENSP00000456469.1	ENSP00000455176.1	ENSP00000456781.1	ENSP00000456256.1	ENSP00000454855.2	ENSP00000456819.1	ENSP00000456599.1	ENSP00000457806.1	ENSP00000457953.1	ENSP00000454933.1	ENSP00000458014.1	ENSP00000457063.1
OG0000221 XP_014454430.1	XP_006259732.2	XP_014457893.1	XP_014457892.1	XP_014457894.1	XP_014457891.1 ENSACAP00000009053.3	ENSACAP00000016760.3 XP_008175143.1	XP_008162722.1	XP_008162720.1	XP_008162721.1	XP_005307838.1	XP_005307839.1	XP_005307840.1	XP_005307841.1	XP_005307836.1	XP_005307837.1	XP_005307843.1 ENSGALP00000043146.1	ENSGALP00000010789.4 ENSP00000371614.1	ENSP00000432252.1	ENSP00000436474.1	ENSP00000445168.2	ENSP00000466380.1	ENSP00000320853.7	ENSP00000468190.1	ENSP00000310649.1	ENSP00000467357.1	ENSP00000433235.1	ENSP00000432672.1	ENSP00000433684.1	ENSP00000310697.9	ENSP00000434075.1	ENSP00000433370.1	ENSP00000431152.1	ENSP00000432000.1 ENSPSIP00000016886.1	ENSPSIP00000016901.1 gopAga1_00004870-RA	gopAga1_00019415-RA
OG0000222 XP_006273259.1	XP_006260350.1	XP_014463000.1	XP_014462999.1 ENSACAP00000000831.2	ENSACAP00000011147.3 XP_005296002.1	XP_005313930.1	XP_008171542.1 ENSGALP00000011549.4	ENSGALP00000042363.1 ENSP00000417242.1	ENSP00000418395.1	ENSP00000397949.1	ENSP00000420314.1	ENSP00000420444.1	ENSP00000419603.1	ENSP00000420249.1	ENSP00000413676.2	ENSP00000419064.1	ENSP00000367731.1	ENSP00000367723.1	ENSP00000377991.1	ENSP00000354270.2	ENSP00000367728.4	ENSP00000181796.2	ENSP00000418120.1	ENSP00000417782.1	ENSP00000367726.3	ENSP00000367719.2	ENSP00000418365.1	ENSP00000418330.1	ENSP00000417845.1	ENSP00000479842.1	ENSP00000419529.1	ENSP00000419124.1	ENSP00000400858.2	ENSP00000418038.1 ENSPSIP00000006892.1	ENSPSIP00000018217.1 gopAga1_00014674-RA	gopAga1_00012633-RA
OG0000223 XP_006261573.1	XP_006261572.1	XP_006261574.1	XP_014454509.1	XP_006261853.2 ENSACAP00000005292.2	ENSACAP00000002253.1 XP_005307020.1	XP_005307017.1	XP_008164953.1	XP_005286466.1	XP_008164032.1	XP_008164945.1	XP_005307015.1	XP_005307016.1	XP_005286465.1	XP_005286464.1 ENSGALP00000003098.3	ENSGALP00000022849.3 ENSP00000390862.1	ENSP00000488486.1	ENSP00000488340.1	ENSP00000331775.6	ENSP00000437912.1	ENSP00000446121.2	ENSP00000337598.4	ENSP00000386383.1	ENSP00000376987.1	ENSP00000386926.1	ENSP00000387264.1	ENSP00000386637.2	ENSP00000347240.4	ENSP00000326888.5	ENSP00000443794.2	ENSP00000387002.1 ENSPSIP00000003085.1	ENSPSIP00000003087.1	ENSPSIP00000010693.1	ENSPSIP00000010706.1 gopAga1_00012066-RA	gopAga1_00001241-RA	gopAga1_00012066-RB
OG0000224 XP_014466254.1	XP_014466255.1	XP_006261642.1	XP_014465645.1	XP_014457367.1 ENSACAP00000001445.3	ENSACAP00000005565.2	ENSACAP00000003575.2	ENSACAP00000004024.2 XP_005307617.1	XP_005307618.1	XP_005307619.1	XP_008171447.1	XP_008178054.1	XP_005307616.1	XP_008162188.1	XP_008162189.1	XP_008162186.1	XP_008162187.1	XP_008162185.1 ENSGALP00000011951.4	ENSGALP00000039234.2	ENSGALP00000010735.4	ENSGALP00000012150.4 ENSP00000483316.1	ENSP00000285238.8	ENSP00000395160.1	ENSP00000479163.1	ENSP00000382342.3	ENSP00000359478.4	ENSP00000205557.7 ENSPSIP00000020493.1	ENSPSIP00000020495.1	ENSPSIP00000020329.1	ENSPSIP00000013545.1	ENSPSIP00000013508.1	ENSPSIP00000018471.1 gopAga1_00010778-RA	gopAga1_00002590-RC	gopAga1_00002590-RA	gopAga1_00002590-RB	gopAga1_00006672-RA
OG0000225 XP_014450921.1	XP_014450924.1	XP_014450925.1	XP_014450922.1	XP_006270389.1	XP_006263435.1	XP_006263434.2	XP_006263437.2 ENSACAP00000014771.2	ENSACAP00000014502.2	ENSACAP00000014551.2	ENSACAP00000014705.2	ENSACAP00000022278.1	ENSACAP00000014796.2 XP_008168170.1	XP_008168111.1	XP_005284779.2	XP_005284780.1	XP_005284781.1	XP_008168169.1 ENSGALP00000032002.3	ENSGALP00000014186.4	ENSGALP00000041291.1	ENSGALP00000041036.1	ENSGALP00000041584.1	ENSGALP00000014563.4 ENSP00000416610.1	ENSP00000382434.3	ENSP00000342785.4	ENSP00000396045.1	ENSP00000371886.4	ENSP00000290472.3 ENSPSIP00000019561.1	ENSPSIP00000019565.1	ENSPSIP00000016870.1	ENSPSIP00000020087.1	ENSPSIP00000006470.1 gopAga1_00005449-RA	gopAga1_00016665-RA	gopAga1_00005450-RA	gopAga1_00005457-RA	gopAga1_00018600-RA
OG0000226 XP_014455824.1	XP_014453167.1	XP_014453168.1	XP_006267008.1	XP_006276392.1	XP_006276391.1 ENSACAP00000011536.2	ENSACAP00000006681.3	ENSACAP00000014981.3 XP_005298044.1	XP_005298045.1	XP_005298046.1	XP_005298047.1	XP_005298048.1	XP_008164443.1	XP_008164444.1	XP_005283361.1	XP_005283366.1	XP_005283367.1 ENSGALP00000026977.4	ENSGALP00000002581.4 ENSP00000377531.1	ENSP00000430532.1	ENSP00000274546.6	ENSP00000480066.1	ENSP00000274547.2	ENSP00000486819.1	ENSP00000481004.1	ENSP00000295454.3	ENSP00000429320.1	ENSP00000429750.1	ENSP00000439169.1	ENSP00000299267.4	ENSP00000383049.3	ENSP00000308725.5	ENSP00000442408.2 ENSPSIP00000011640.1	ENSPSIP00000008466.1	ENSPSIP00000008469.1	ENSPSIP00000006151.1 gopAga1_00006452-RA	gopAga1_00009265-RA
OG0000227 XP_006268306.2 ENSACAP00000019250.1 XP_008165948.1 ENSGALP00000000317.3 ENSP00000383674.3	ENSP00000344298.5	ENSP00000463346.1	ENSP00000462872.1	ENSP00000335617.5	ENSP00000333071.3	ENSP00000459551.1	ENSP00000463186.1	ENSP00000462864.1	ENSP00000481100.1	ENSP00000486192.1	ENSP00000486596.1	ENSP00000487050.1	ENSP00000485882.1	ENSP00000480274.1	ENSP00000464535.1	ENSP00000332536.7	ENSP00000472528.1	ENSP00000463564.1	ENSP00000463081.1	ENSP00000325713.5	ENSP00000437021.1	ENSP00000487663.1	ENSP00000487612.1	ENSP00000488106.1	ENSP00000482650.1	ENSP00000443345.2	ENSP00000326324.5	ENSP00000487340.1	ENSP00000486567.1	ENSP00000481827.1	ENSP00000377108.2	ENSP00000378202.4	ENSP00000340519.7	ENSP00000463146.1 ENSPSIP00000005478.1	ENSPSIP00000005485.1 gopAga1_00003217-RA
OG0000228 XP_014451187.1 ENSP00000411205.2	ENSP00000408960.2	ENSP00000404747.1	ENSP00000416944.2	ENSP00000415456.2	ENSP00000432961.1	ENSP00000365239.4	ENSP00000342156.5	ENSP00000365240.3	ENSP00000365241.4	ENSP00000391177.2	ENSP00000389071.2	ENSP00000437322.1	ENSP00000416105.2	ENSP00000406373.2	ENSP00000432357.1	ENSP00000409874.2	ENSP00000412702.1	ENSP00000405306.2	ENSP00000389419.1	ENSP00000389396.2	ENSP00000390131.2	ENSP00000409048.2	ENSP00000433448.1	ENSP00000431193.1	ENSP00000415697.2	ENSP00000395238.2	ENSP00000403978.2	ENSP00000416035.2	ENSP00000431646.1	ENSP00000399128.1	ENSP00000412474.2	ENSP00000398313.2	ENSP00000372969.4	ENSP00000432120.1	ENSP00000383100.3	ENSP00000372968.2	ENSP00000372970.4	ENSP00000402904.2 ENSPSIP00000005267.1 gopAga1_00018533-RA
OG0000229 XP_014452258.1	XP_014452259.1	XP_014452260.1	XP_014452261.1	XP_014452262.1	XP_014452263.1	XP_014452251.1	XP_014452253.1	XP_014452252.1	XP_014452255.1	XP_014452254.1	XP_014452257.1	XP_014452256.1 ENSACAP00000022051.1	ENSACAP00000008247.3 XP_008173821.1	XP_008173826.1	XP_008173849.1	XP_005303994.1	XP_005303995.1	XP_005303996.1	XP_005303997.1	XP_005303992.1	XP_005303993.1	XP_008173818.1	XP_008173857.1	XP_008173839.1	XP_008173834.1	XP_008173866.1	XP_008173860.1 ENSGALP00000018461.4 ENSP00000341118.4	ENSP00000383623.3	ENSP00000404595.2	ENSP00000375956.3	ENSP00000375960.2	ENSP00000252692.5	ENSP00000355771.3 ENSPSIP00000003243.1	ENSPSIP00000003240.1 gopAga1_00011126-RA	gopAga1_00011126-RB
OG0000230 XP_014457979.1	XP_014457621.1	XP_014457669.1	XP_014457940.1	XP_014457738.1	XP_014457701.1	XP_014458025.1	XP_014457853.1	XP_014457897.1	XP_014457794.1 ENSACAP00000014203.3 XP_008161004.1	XP_008161003.1	XP_008161002.1	XP_008161000.1	XP_008160997.1	XP_005295107.1	XP_005295108.1	XP_008160998.1	XP_008160999.1	XP_005295110.1	XP_005295111.1 ENSGALP00000018445.4 ENSP00000423434.1	ENSP00000424402.1	ENSP00000439831.2	ENSP00000420931.1	ENSP00000424258.1	ENSP00000421627.1	ENSP00000425884.1	ENSP00000422533.1	ENSP00000423388.1	ENSP00000421476.1	ENSP00000424120.1	ENSP00000423787.1	ENSP00000425033.1	ENSP00000425201.1	ENSP00000421372.1	ENSP00000424030.1 ENSPSIP00000003058.1	ENSPSIP00000003056.1 gopAga1_00001115-RA
OG0000231 XP_014461966.1	XP_014464880.1	XP_014461967.1	XP_014461965.1	XP_014461968.1	XP_014461964.1 ENSACAP00000007923.3	ENSACAP00000009849.3 XP_008177130.1	XP_005315189.1	XP_005286888.1	XP_005286889.1	XP_005286890.1	XP_005286891.1	XP_008177111.1	XP_005286892.1	XP_005286893.1	XP_008176239.1	XP_008173324.1	XP_008177107.1	XP_008168597.1	XP_008168596.1 ENSGALP00000011479.4	ENSGALP00000000880.4 ENSP00000438075.2	ENSP00000354878.5	ENSP00000445606.2	ENSP00000449700.1	ENSP00000411831.2	ENSP00000353724.5	ENSP00000433808.1	ENSP00000328494.2	ENSP00000354851.3	ENSP00000447765.1	ENSP00000448792.1 ENSPSIP00000013189.1	ENSPSIP00000013171.1	ENSPSIP00000020149.1	ENSPSIP00000020146.1 gopAga1_00009563-RA	gopAga1_00002013-RA	gopAga1_00002014-RA
OG0000232 XP_014464713.1	XP_014464715.1	XP_014464714.1	XP_014464711.1	XP_014464710.1	XP_014464716.1 ENSACAP00000013165.3	ENSACAP00000013167.3 XP_008173046.1	XP_008173047.1	XP_008173074.1	XP_008173048.1 ENSGALP00000004383.3 ENSP00000418986.1	ENSP00000419103.1	ENSP00000419481.1	ENSP00000420705.2	ENSP00000418819.1	ENSP00000420412.1	ENSP00000417241.1	ENSP00000418212.1	ENSP00000489431.1	ENSP00000326002.7	ENSP00000419274.1	ENSP00000397145.3	ENSP00000420201.1	ENSP00000417554.1	ENSP00000417988.1	ENSP00000420781.1	ENSP00000419988.1	ENSP00000420253.1	ENSP00000418960.2	ENSP00000418548.1	ENSP00000465347.1	ENSP00000418775.1	ENSP00000465818.1	ENSP00000467329.1	ENSP00000312236.5	ENSP00000417148.1	ENSP00000350283.3 ENSPSIP00000005621.1 gopAga1_00002501-RA
OG0000233 ENSACAP00000023067.1	ENSACAP00000022875.1	ENSACAP00000021810.1 XP_008177645.1	XP_008173881.1	XP_005301374.1	XP_008166738.1	XP_008171224.1	XP_008166373.1	XP_005312656.2	XP_005279981.1	XP_005279980.1	XP_008172870.1	XP_008176218.1	XP_008167913.1	XP_005280808.2 ENSPSIP00000000364.1	ENSPSIP00000000962.1	ENSPSIP00000001440.1 gopAga1_00010404-RA	gopAga1_00000894-RA	gopAga1_00000893-RA	gopAga1_00003022-RA	gopAga1_00006432-RA	gopAga1_00010405-RA	gopAga1_00005364-RA	gopAga1_00003192-RA	gopAga1_00004114-RA	gopAga1_00006057-RA	gopAga1_00000594-RA	gopAga1_00011967-RA	gopAga1_00004014-RB	gopAga1_00004014-RA	gopAga1_00005422-RA	gopAga1_00003893-RA	gopAga1_00006431-RA	gopAga1_00004379-RA	gopAga1_00006429-RA	gopAga1_00000971-RA	gopAga1_00000972-RA	gopAga1_00004360-RA	gopAga1_00000035-RA
OG0000234 XP_006277120.1	XP_006273402.1	XP_006258514.1	XP_006258205.2	XP_014465538.1	XP_014449840.1	XP_014449841.1 ENSACAP00000014773.3	ENSACAP00000006225.2	ENSACAP00000013343.2	ENSACAP00000015231.2	ENSACAP00000005181.3 XP_005308617.1	XP_005306644.1	XP_005301998.1	XP_005291961.1	XP_005291962.1	XP_005306645.2 ENSGALP00000039595.2	ENSGALP00000003945.4	ENSGALP00000035064.2	ENSGALP00000015687.3	ENSGALP00000043268.1 ENSP00000482184.1	ENSP00000364000.3	ENSP00000297268.6	ENSP00000338213.6	ENSP00000304408.3	ENSP00000315243.6	ENSP00000369889.3	ENSP00000477719.1	ENSP00000225964.5 ENSPSIP00000007521.1	ENSPSIP00000016672.1	ENSPSIP00000019002.1	ENSPSIP00000009514.1 gopAga1_00002208-RA	gopAga1_00009737-RA	gopAga1_00007093-RA	gopAga1_00007094-RA	gopAga1_00003701-RA
OG0000235 XP_014465670.1	XP_014465672.1	XP_006260432.1	XP_006260434.1	XP_006260433.1	XP_006260435.1	XP_006260430.1	XP_006260431.1	XP_014465567.1 ENSACAP00000012993.3	ENSACAP00000003317.3 XP_005291631.1	XP_005291629.1	XP_005291628.1	XP_005291630.1	XP_005291627.1	XP_008166863.1 ENSGALP00000035841.2	ENSGALP00000038113.2 ENSP00000430728.1	ENSP00000428742.2	ENSP00000428543.1	ENSP00000332122.5	ENSP00000268679.4	ENSP00000454851.1	ENSP00000379520.1	ENSP00000353504.2	ENSP00000429728.1	ENSP00000427763.1	ENSP00000265814.3	ENSP00000481799.1	ENSP00000480500.1	ENSP00000402257.3	ENSP00000481315.1	ENSP00000390137.2	ENSP00000478331.1	ENSP00000481112.1 ENSPSIP00000002460.1	ENSPSIP00000002467.1	ENSPSIP00000002466.1 gopAga1_00012349-RA
OG0000236 XP_006278049.1	XP_006260721.1	XP_014451329.1	XP_006267124.1	XP_006267125.1 ENSACAP00000022677.1	ENSACAP00000013796.2	ENSACAP00000006668.3	ENSACAP00000013790.2 XP_005314893.1	XP_005291002.1	XP_005280095.1	XP_005280097.1	XP_005280096.1	XP_005280098.1	XP_005311818.1 ENSGALP00000016177.1 ENSP00000269053.3	ENSP00000434629.1	ENSP00000304762.5	ENSP00000482955.1	ENSP00000488304.1	ENSP00000366139.3	ENSP00000305847.5	ENSP00000483358.1	ENSP00000449969.1	ENSP00000261267.2	ENSP00000449898.1	ENSP00000364650.3	ENSP00000364467.2	ENSP00000378134.1	ENSP00000463386.1	ENSP00000483897.1 ENSPSIP00000016352.1	ENSPSIP00000018273.1	ENSPSIP00000018209.1	ENSPSIP00000018252.1	ENSPSIP00000016988.1 gopAga1_00010015-RA	gopAga1_00016114-RA	gopAga1_00013379-RA
OG0000237 XP_014463551.1	XP_014463552.1	XP_014463553.1	XP_014463554.1	XP_014463555.1	XP_006276535.1	XP_014453960.1	XP_014453958.1	XP_006264244.2	XP_014453959.1 ENSACAP00000002314.2	ENSACAP00000009205.2 XP_008161859.1	XP_005298883.2	XP_005298882.2	XP_005298880.2	XP_005298879.2	XP_008177045.1	XP_008177046.1	XP_008161862.1	XP_008161863.1	XP_008161860.1	XP_008161861.1	XP_008161864.1	XP_008161865.1	XP_008161858.1 ENSGALP00000034072.3	ENSGALP00000008073.4 ENSP00000483674.1	ENSP00000479901.1	ENSP00000488846.1	ENSP00000482269.1	ENSP00000478547.1	ENSP00000483969.1	ENSP00000367079.3	ENSP00000341044.7 ENSPSIP00000012716.1	ENSPSIP00000012729.1	ENSPSIP00000005262.1 gopAga1_00001940-RA	gopAga1_00002312-RA
OG0000238 XP_006264900.2	XP_006270272.2	XP_014463687.1	XP_014463655.1	XP_014460464.1 ENSACAP00000020511.1	ENSACAP00000017216.3	ENSACAP00000020768.1 XP_008173311.1	XP_008173312.1	XP_008176442.1	XP_008175989.1	XP_008176416.1	XP_005280152.1	XP_005302042.1	XP_008175990.1	XP_008169188.1	XP_008176400.1	XP_005300224.1	XP_005280159.1 ENSGALP00000014886.4 ENSP00000360871.3	ENSP00000291741.5	ENSP00000291744.6 ENSPSIP00000012635.1	ENSPSIP00000011085.1	ENSPSIP00000009134.1	ENSPSIP00000016223.1	ENSPSIP00000019152.1	ENSPSIP00000019166.1	ENSPSIP00000002596.1	ENSPSIP00000007378.1 gopAga1_00009268-RA	gopAga1_00019941-RA	gopAga1_00013963-RA	gopAga1_00013965-RA	gopAga1_00013965-RB	gopAga1_00009266-RA	gopAga1_00009267-RA	gopAga1_00017503-RA	gopAga1_00017503-RB
OG0000239 XP_014455536.1	XP_014450931.1	XP_006265980.1	XP_006265979.1 ENSACAP00000016206.3	ENSACAP00000003494.3 XP_005284660.1	XP_005284658.1	XP_005284659.1	XP_005300579.1	XP_005300574.1	XP_005300577.1	XP_005300578.1	XP_005300573.1	XP_005300570.1 ENSGALP00000042604.1	ENSGALP00000017498.4	ENSGALP00000015243.4	ENSGALP00000015245.4 ENSP00000385243.2	ENSP00000347699.6	ENSP00000384612.4	ENSP00000384218.4	ENSP00000451912.1	ENSP00000412144.2	ENSP00000478186.1	ENSP00000383953.3	ENSP00000341199.7	ENSP00000450936.1	ENSP00000450858.1	ENSP00000451855.1	ENSP00000390138.2	ENSP00000452331.1	ENSP00000451030.1	ENSP00000355521.1	ENSP00000355522.1	ENSP00000355523.1	ENSP00000355520.5 ENSPSIP00000014024.1	ENSPSIP00000007354.1 gopAga1_00009851-RA
OG0000240 XP_014456618.1	XP_014456617.1	XP_014456616.1	XP_014451371.1	XP_006267129.1 ENSACAP00000021734.1	ENSACAP00000022883.1 XP_005303617.1	XP_005303618.1	XP_005280078.1	XP_005303620.1	XP_005303619.1 ENSGALP00000002236.2	ENSGALP00000016120.2 ENSP00000444467.1	ENSP00000445090.1	ENSP00000250559.9	ENSP00000444060.1	ENSP00000368270.3	ENSP00000446318.1	ENSP00000440466.1	ENSP00000443775.1	ENSP00000444830.1	ENSP00000443851.1	ENSP00000440014.1	ENSP00000437415.1	ENSP00000399986.2	ENSP00000440708.1	ENSP00000439966.1	ENSP00000441275.1	ENSP00000401095.2	ENSP00000377085.5	ENSP00000488821.1	ENSP00000488326.1	ENSP00000348786.1	ENSP00000396741.1	ENSP00000358723.3 ENSPSIP00000018559.1	ENSPSIP00000003830.1 gopAga1_00011713-RA	gopAga1_00001402-RA
OG0000241 XP_006272618.1	XP_014451017.1	XP_014451018.1	XP_014451016.1 ENSACAP00000015862.1	ENSACAP00000022453.1	ENSACAP00000013187.3 XP_005284643.1	XP_005284642.1	XP_005284640.1	XP_005284641.1	XP_005284638.1	XP_005284639.1	XP_005284636.1	XP_005284637.1 ENSGALP00000015121.4 ENSP00000451117.1	ENSP00000451513.1	ENSP00000451300.1	ENSP00000452888.1	ENSP00000451625.1	ENSP00000452069.2	ENSP00000453209.1	ENSP00000451326.1	ENSP00000450817.2	ENSP00000446001.3	ENSP00000442759.1	ENSP00000469310.1	ENSP00000252891.3	ENSP00000469736.1	ENSP00000347169.3	ENSP00000451559.1	ENSP00000352563.3	ENSP00000441258.2	ENSP00000348644.4	ENSP00000452416.1	ENSP00000452357.1	ENSP00000451374.1	ENSP00000472400.1 ENSPSIP00000010488.1 gopAga1_00001073-RA
OG0000242 XP_006276992.1	XP_006276993.1	XP_006276995.1	XP_006276996.2	XP_014462164.1	XP_014462165.1 ENSACAP00000000913.3	ENSACAP00000001566.3	ENSACAP00000020293.2 XP_005307132.1	XP_005307133.1	XP_005307134.1	XP_005307135.1	XP_005307140.1 ENSGALP00000020952.4	ENSGALP00000041146.1	ENSGALP00000020953.3	ENSGALP00000020955.3	ENSGALP00000020960.2 ENSP00000401645.1	ENSP00000299502.4	ENSP00000369919.3	ENSP00000370074.4	ENSP00000369901.1	ENSP00000369891.1	ENSP00000369896.1	ENSP00000484343.1	ENSP00000481398.1	ENSP00000338358.5	ENSP00000369912.1	ENSP00000238508.3	ENSP00000479385.1 ENSPSIP00000019121.1	ENSPSIP00000018841.1	ENSPSIP00000004397.1	ENSPSIP00000018359.1 gopAga1_00017358-RB	gopAga1_00017359-RA	gopAga1_00009434-RA	gopAga1_00009435-RA	gopAga1_00009436-RA
OG0000243 XP_014462047.1	XP_014462046.1	XP_014465929.1	XP_014465928.1	XP_014465931.1	XP_014465930.1	XP_014465933.1	XP_014465932.1	XP_014465935.1	XP_014465934.1	XP_006277533.1	XP_014462048.1	XP_014462049.1	XP_014462050.1	XP_014462051.1	XP_014465927.1 ENSACAP00000011272.3	ENSACAP00000015533.3 XP_005289457.1	XP_008178013.1	XP_005284151.1	XP_005289455.1	XP_008177810.1	XP_005284152.1	XP_005289465.1	XP_005289463.1	XP_005289456.1	XP_005284147.1 ENSGALP00000032557.2	ENSGALP00000003484.4 ENSP00000377088.5	ENSP00000385339.2	ENSP00000359206.3	ENSP00000377391.2	ENSP00000265094.5	ENSP00000296933.6 ENSPSIP00000013387.1	ENSPSIP00000008119.1	ENSPSIP00000013393.1 gopAga1_00005415-RA	gopAga1_00007901-RA
OG0000244 XP_014462010.1	XP_014466561.1	XP_014454458.1 ENSACAP00000019494.1	ENSACAP00000017100.2	ENSACAP00000002113.3 XP_005283952.1	XP_005283954.1	XP_008163108.1	XP_008163109.1	XP_008165322.1	XP_008165323.1	XP_008165320.1	XP_008165321.1	XP_008163114.1	XP_008163112.1	XP_008163111.1 ENSGALP00000003269.4	ENSGALP00000025484.4	ENSGALP00000024847.4 ENSP00000362185.4	ENSP00000362183.3	ENSP00000446326.2	ENSP00000311646.8	ENSP00000397026.1	ENSP00000405596.1	ENSP00000358134.1	ENSP00000313276.7	ENSP00000358130.5	ENSP00000358133.4	ENSP00000382791.1	ENSP00000382793.1	ENSP00000327687.4	ENSP00000382798.1	ENSP00000373776.2	ENSP00000373777.3	ENSP00000382797.1 ENSPSIP00000002699.1	ENSPSIP00000017646.1	ENSPSIP00000010596.1 gopAga1_00001270-RA
OG0000245 XP_014460717.1	XP_014463880.1	XP_014454691.1 ENSACAP00000004788.2	ENSACAP00000013451.2	ENSACAP00000012009.3 XP_005288372.1	XP_005288371.1	XP_008164717.1	XP_005280926.1	XP_005297001.1	XP_005288378.1	XP_005297000.1	XP_005288375.1	XP_005288377.1	XP_005288373.1	XP_005288374.1	XP_005288379.1 ENSGALP00000027326.6	ENSGALP00000011055.3 ENSP00000321348.8	ENSP00000362152.3	ENSP00000348082.4	ENSP00000362145.5	ENSP00000373706.4	ENSP00000428268.2	ENSP00000362140.4	ENSP00000479091.1	ENSP00000478137.1	ENSP00000267215.4	ENSP00000383174.1	ENSP00000383173.1	ENSP00000367141.2	ENSP00000383178.3	ENSP00000373709.6	ENSP00000253811.7	ENSP00000381565.5 ENSPSIP00000017149.1	ENSPSIP00000007602.1	ENSPSIP00000006602.1 gopAga1_00003986-RA
OG0000246 XP_014458028.1	XP_014458027.1	XP_014458026.1 ENSACAP00000013313.2 XP_008169378.1	XP_008169379.1	XP_008169391.1	XP_008169390.1	XP_008169393.1	XP_008169392.1	XP_008169394.1	XP_005302723.1	XP_005302724.1	XP_008169386.1	XP_008169387.1	XP_008169384.1	XP_008169385.1	XP_008169382.1	XP_008169383.1	XP_008169380.1	XP_008169381.1	XP_005302714.1	XP_008169388.1	XP_008169389.1	XP_005302711.1	XP_005302717.1	XP_005302715.1	XP_005302710.1	XP_005302704.1	XP_005302722.1	XP_005302721.1 ENSGALP00000019543.4 ENSP00000489023.1	ENSP00000352581.6	ENSP00000419305.3	ENSP00000417518.1	ENSP00000382297.4	ENSP00000419974.2 ENSPSIP00000003662.1	ENSPSIP00000003657.1 gopAga1_00008982-RA
OG0000247 XP_014458569.1	XP_014466897.1	XP_014466896.1	XP_014466898.1	XP_014466899.1 ENSACAP00000003773.3	ENSACAP00000021062.1	ENSACAP00000010751.3	ENSACAP00000017145.3	ENSACAP00000017159.3 XP_008166983.1	XP_008175067.1	XP_008175298.1	XP_005280827.1 ENSGALP00000011753.4	ENSGALP00000014800.3	ENSGALP00000015605.4 ENSP00000357952.2	ENSP00000357905.3	ENSP00000343175.3	ENSP00000342210.3	ENSP00000357951.3	ENSP00000327747.4	ENSP00000352071.4	ENSP00000352593.6	ENSP00000484603.1	ENSP00000315945.3	ENSP00000393474.2	ENSP00000403885.2	ENSP00000379863.3	ENSP00000444071.1 ENSPSIP00000004820.1	ENSPSIP00000010779.1	ENSPSIP00000010199.1	ENSPSIP00000007416.1	ENSPSIP00000012960.1 gopAga1_00012284-RA	gopAga1_00012284-RC	gopAga1_00012284-RB	gopAga1_00012284-RD	gopAga1_00017971-RB
OG0000248 XP_005281876.1	XP_005283419.2	XP_005308053.1	XP_005314599.1	XP_005306854.1 ENSP00000451594.1	ENSP00000429344.1	ENSP00000480719.1	ENSP00000482284.1	ENSP00000473064.1	ENSP00000410273.1	ENSP00000391130.1	ENSP00000392342.1	ENSP00000354834.5	ENSP00000445775.1	ENSP00000388850.1	ENSP00000486260.1	ENSP00000298894.4	ENSP00000390576.1	ENSP00000469445.1	ENSP00000318131.10	ENSP00000391488.2	ENSP00000318914.3 ENSPSIP00000004185.1	ENSPSIP00000015778.1	ENSPSIP00000015496.1	ENSPSIP00000005760.1	ENSPSIP00000011075.1	ENSPSIP00000008200.1 gopAga1_00004823-RA	gopAga1_00001275-RA	gopAga1_00014871-RA	gopAga1_00015396-RA	gopAga1_00015750-RA	gopAga1_00007135-RA	gopAga1_00007134-RA	gopAga1_00012954-RA	gopAga1_00008634-RA	gopAga1_00006454-RA	gopAga1_00006450-RA	gopAga1_00019539-RA
OG0000249 XP_005315246.1	XP_008174678.1	XP_005314937.2	XP_008175341.1	XP_008175058.1	XP_008176493.1	XP_008176311.1	XP_008174319.1 ENSP00000480873.1	ENSP00000483104.1	ENSP00000480533.1	ENSP00000484653.1	ENSP00000482197.1	ENSP00000480734.1	ENSP00000480528.1	ENSP00000365813.1	ENSP00000483797.1	ENSP00000484844.1	ENSP00000484699.1	ENSP00000484806.1	ENSP00000481977.1	ENSP00000482869.1	ENSP00000480547.1	ENSP00000479198.1	ENSP00000478333.1	ENSP00000483411.1	ENSP00000478582.1	ENSP00000409412.1	ENSP00000343366.2	ENSP00000401926.1	ENSP00000482726.1	ENSP00000480383.1	ENSP00000413006.2	ENSP00000483412.1	ENSP00000479748.1	ENSP00000479448.1	ENSP00000484886.1	ENSP00000482985.1	ENSP00000483798.1	ENSP00000481140.1	ENSP00000482555.1
OG0000250 XP_006271924.1	XP_014461268.1	XP_006258434.2 ENSACAP00000006236.3	ENSACAP00000002593.3	ENSACAP00000004315.3 XP_008174351.1	XP_008174350.1	XP_008172861.1	XP_008172862.1	XP_008172863.1	XP_008172864.1	XP_008165364.1	XP_005291349.1	XP_008174348.1	XP_008174349.1	XP_008174346.1	XP_008174347.1	XP_008174345.1	XP_005298480.1 ENSGALP00000023294.4	ENSGALP00000023295.4 ENSP00000350907.4	ENSP00000262450.3	ENSP00000440542.1	ENSP00000444614.1	ENSP00000349508.2	ENSP00000332628.7	ENSP00000440392.1	ENSP00000437506.1 ENSPSIP00000011240.1	ENSPSIP00000017808.1	ENSPSIP00000007224.1	ENSPSIP00000011533.1 gopAga1_00019495-RB	gopAga1_00006487-RC	gopAga1_00006487-RA	gopAga1_00019142-RA	gopAga1_00005265-RA	gopAga1_00005265-RB
OG0000251 XP_014465098.1	XP_014466636.1	XP_006260976.1	XP_014465096.1	XP_014465097.1	XP_006260975.1 ENSACAP00000011766.3	ENSACAP00000016286.3	ENSACAP00000002571.3 XP_005302175.1	XP_005302176.1	XP_008169237.1	XP_008166322.1	XP_008171015.1	XP_008171016.1 ENSGALP00000006018.4	ENSGALP00000006555.4	ENSGALP00000023288.2 ENSP00000478108.1	ENSP00000281589.3	ENSP00000217074.4	ENSP00000429395.1	ENSP00000429594.1	ENSP00000313007.5	ENSP00000361947.3	ENSP00000361953.3	ENSP00000445661.1	ENSP00000217073.2	ENSP00000255136.3 ENSPSIP00000019009.1	ENSPSIP00000014840.1	ENSPSIP00000003940.1	ENSPSIP00000003942.1 gopAga1_00006294-RB	gopAga1_00006294-RA	gopAga1_00015703-RC	gopAga1_00015703-RB	gopAga1_00015703-RD	gopAga1_00015703-RA	gopAga1_00014459-RA
OG0000252 XP_006263221.1	XP_014457191.1	XP_014457190.1	XP_014457189.1	XP_006263219.1	XP_006263224.1	XP_006263222.1	XP_006263220.1	XP_006263225.1 ENSACAP00000014246.3 XP_008168487.1	XP_008168482.1	XP_005294034.1	XP_008168500.1	XP_008168483.1	XP_008168489.1	XP_008168484.1	XP_005294032.1	XP_008168485.1	XP_008168488.1	XP_005294033.1	XP_008168499.1	XP_008168498.1	XP_008168486.1	XP_008168493.1	XP_008168492.1	XP_008168491.1	XP_008168490.1	XP_008168497.1	XP_008168496.1	XP_008168495.1	XP_008168494.1 ENSGALP00000003075.4 ENSP00000401437.2	ENSP00000485538.1	ENSP00000355296.3	ENSP00000485500.1	ENSP00000263066.6 ENSPSIP00000009655.1 gopAga1_00006135-RA
OG0000253 XP_006263360.1	XP_006263361.1	XP_006263358.1	XP_006263359.1	XP_006263362.1	XP_006263363.1	XP_014452735.1	XP_014452736.1	XP_014452737.1	XP_006263364.1 ENSACAP00000000468.3 XP_008165686.1	XP_008165687.1	XP_008165684.1	XP_008165685.1	XP_008165688.1	XP_008165689.1	XP_005288201.1	XP_005288196.1	XP_008165690.1	XP_008165693.1	XP_008165683.1 ENSGALP00000023559.3 ENSP00000425636.1	ENSP00000422390.2	ENSP00000389610.2	ENSP00000340874.5	ENSP00000421925.4	ENSP00000426665.2	ENSP00000487538.1	ENSP00000396219.2	ENSP00000486490.1	ENSP00000423597.2	ENSP00000424606.1	ENSP00000486554.1	ENSP00000487184.1	ENSP00000487311.1	ENSP00000487430.1 ENSPSIP00000013758.1 gopAga1_00000596-RA
OG0000254 XP_014459665.1	XP_014459663.1	XP_014459666.1	XP_006263475.2	XP_014459699.1 ENSACAP00000014603.3 XP_005307352.1 ENSGALP00000011167.2 ENSP00000488555.1	ENSP00000488114.1	ENSP00000484572.1	ENSP00000479004.1	ENSP00000488734.1	ENSP00000487940.1	ENSP00000488547.1	ENSP00000487751.1	ENSP00000435748.1	ENSP00000435057.1	ENSP00000434947.1	ENSP00000435798.1	ENSP00000346402.2	ENSP00000348515.5	ENSP00000431201.1	ENSP00000433033.1	ENSP00000434971.1	ENSP00000488030.1	ENSP00000480036.1	ENSP00000479966.1	ENSP00000487753.1	ENSP00000380729.3	ENSP00000380739.2	ENSP00000432170.1	ENSP00000488388.1	ENSP00000433999.1	ENSP00000416589.2	ENSP00000435594.1	ENSP00000380738.1	ENSP00000478664.1 ENSPSIP00000016413.1 gopAga1_00018578-RA
OG0000255 XP_014460901.1	XP_014449051.1	XP_006263621.1 ENSACAP00000006725.3	ENSACAP00000003645.1	ENSACAP00000006006.3 XP_008173720.1	XP_005294259.1	XP_005294260.1	XP_005295020.1	XP_008176103.1	XP_008170267.1	XP_008173719.1	XP_008173718.1	XP_005294261.1 ENSGALP00000011713.4	ENSGALP00000032039.3 ENSP00000355117.3	ENSP00000457586.1	ENSP00000378327.2	ENSP00000378332.3	ENSP00000431284.1	ENSP00000461855.1	ENSP00000391283.2	ENSP00000228307.7	ENSP00000395536.2	ENSP00000267257.7	ENSP00000447180.1	ENSP00000446607.1	ENSP00000443745.1	ENSP00000443887.1	ENSP00000378512.2 ENSPSIP00000005189.1	ENSPSIP00000006018.1	ENSPSIP00000006021.1	ENSPSIP00000014000.1 gopAga1_00014560-RA	gopAga1_00010971-RA	gopAga1_00010973-RA	gopAga1_00016503-RA
OG0000256 XP_014457287.1	XP_014457339.1	XP_014457338.1	XP_014457290.1	XP_014457291.1	XP_014457288.1	XP_014457289.1	XP_006273056.1	XP_014457336.1	XP_014457337.1	XP_014457334.1	XP_014457335.1	XP_014457333.1 ENSACAP00000015275.3	ENSACAP00000014972.3	ENSACAP00000020164.2 XP_008165951.1	XP_005283020.1	XP_005283019.1 ENSGALP00000006896.4	ENSGALP00000006898.4 ENSP00000467271.1	ENSP00000269080.1	ENSP00000269081.4	ENSP00000467186.1	ENSP00000428032.1	ENSP00000402814.3	ENSP00000376443.2	ENSP00000467882.1	ENSP00000394264.2	ENSP00000342216.3	ENSP00000467448.1 ENSPSIP00000010295.1	ENSPSIP00000008327.1	ENSPSIP00000009610.1 gopAga1_00003279-RA	gopAga1_00003281-RA	gopAga1_00003278-RA	gopAga1_00003278-RC	gopAga1_00003278-RB
OG0000257 XP_006273912.2	XP_006273913.2	XP_006273916.2	XP_006273917.2	XP_006273914.2	XP_006273915.2	XP_006273918.2	XP_006273920.2	XP_014463692.1	XP_014463691.1 ENSACAP00000012109.2 XP_008172582.1	XP_008172583.1	XP_008172580.1	XP_008172586.1	XP_008172587.1	XP_008172584.1	XP_008172585.1	XP_008172588.1	XP_008172589.1	XP_005309173.1	XP_008172581.1	XP_008172590.1	XP_008172577.1	XP_008172576.1	XP_008172575.1	XP_008172574.1	XP_008172573.1	XP_008172572.1	XP_008172571.1	XP_008172578.1	XP_008172579.1 ENSGALP00000039377.2	ENSGALP00000013792.4 ENSP00000436107.1	ENSP00000417328.1	ENSP00000417980.1 ENSPSIP00000006137.1	ENSPSIP00000006144.1 gopAga1_00006129-RA
OG0000258 XP_014449875.1	XP_014452076.1	XP_014466144.1	XP_006275194.1 ENSACAP00000012394.3	ENSACAP00000012504.3	ENSACAP00000003010.3	ENSACAP00000005454.2 XP_008166218.1	XP_008166219.1	XP_008166214.1	XP_008166215.1	XP_008166216.1	XP_008166217.1	XP_008166211.1	XP_008166212.1	XP_008166213.1	XP_008162854.1	XP_005285312.1	XP_005294325.1 ENSGALP00000008972.4	ENSGALP00000012713.4	ENSGALP00000006832.5	ENSGALP00000003700.4 ENSP00000261383.3	ENSP00000401514.2	ENSP00000312554.6	ENSP00000374187.4	ENSP00000295937.3	ENSP00000418137.2	ENSP00000311273.6	ENSP00000386912.1 ENSPSIP00000009826.1	ENSPSIP00000011789.1	ENSPSIP00000005467.1	ENSPSIP00000014389.1 gopAga1_00013893-RA	gopAga1_00001573-RA	gopAga1_00003841-RA	gopAga1_00013048-RA
OG0000259 XP_014454469.1	XP_014463819.1	XP_014465380.1	XP_014454465.1 ENSACAP00000006031.3	ENSACAP00000001786.3	ENSACAP00000005791.3 XP_008164027.1	XP_005279225.1	XP_005279224.1	XP_005279221.1	XP_005279220.1	XP_005279223.1	XP_005279222.1	XP_005279219.1	XP_008176098.1	XP_008164026.1	XP_008164025.1 ENSGALP00000006087.4	ENSGALP00000002651.3	ENSGALP00000035716.2 ENSP00000487423.1	ENSP00000337572.4	ENSP00000487220.1	ENSP00000261491.4	ENSP00000486362.1	ENSP00000368576.3	ENSP00000485809.1	ENSP00000486838.1	ENSP00000479051.1	ENSP00000386455.3	ENSP00000264057.2	ENSP00000445114.2 ENSPSIP00000007251.1	ENSPSIP00000007131.1	ENSPSIP00000003421.1 gopAga1_00001248-RB	gopAga1_00001248-RA	gopAga1_00007452-RA	gopAga1_00011905-RA
OG0000260 XP_014454971.1	XP_014454970.1 ENSACAP00000004620.3 XP_005279844.1	XP_005279845.1	XP_005279843.1	XP_008166012.1	XP_008166013.1	XP_008166010.1	XP_008166011.1	XP_008166016.1	XP_008166017.1	XP_008166014.1	XP_008166015.1	XP_008166018.1	XP_008166019.1	XP_008165998.1	XP_008165999.1	XP_008165997.1	XP_005279846.1	XP_005279839.1	XP_008166005.1	XP_008166004.1	XP_008166007.1	XP_008166006.1	XP_008166001.1	XP_008166000.1	XP_008166003.1	XP_008166002.1	XP_008166009.1	XP_008166008.1	XP_008166020.1 ENSGALP00000019007.4 ENSP00000263710.4	ENSP00000400562.3	ENSP00000386442.3	ENSP00000380717.4 ENSPSIP00000007110.1	ENSPSIP00000007142.1 gopAga1_00001655-RA
OG0000261 XP_014455251.1 ENSACAP00000015895.2 XP_005312249.1 ENSP00000410503.2	ENSP00000482742.1	ENSP00000481544.1	ENSP00000481947.1	ENSP00000375634.1	ENSP00000482252.1	ENSP00000484199.1	ENSP00000482884.1	ENSP00000478041.1	ENSP00000481758.1	ENSP00000483526.1	ENSP00000483987.1	ENSP00000484933.1	ENSP00000480282.1	ENSP00000479750.1	ENSP00000479760.1	ENSP00000478965.1	ENSP00000482369.1	ENSP00000478088.1	ENSP00000481864.1	ENSP00000480531.1	ENSP00000478623.1	ENSP00000477618.1	ENSP00000480894.1	ENSP00000481119.1	ENSP00000480575.1	ENSP00000344377.5	ENSP00000245615.1	ENSP00000388250.1	ENSP00000482625.1	ENSP00000477891.1	ENSP00000484954.1	ENSP00000478522.1	ENSP00000483839.1	ENSP00000481455.1 gopAga1_00017576-RA	gopAga1_00017576-RB
OG0000262 XP_014457213.1	XP_014457212.1	XP_014457214.1 ENSACAP00000001620.3 XP_005311685.1	XP_005311683.1	XP_008173928.1 ENSGALP00000022772.4	ENSGALP00000035738.1 ENSP00000487614.1	ENSP00000488435.1	ENSP00000488595.1	ENSP00000431960.1	ENSP00000432091.1	ENSP00000395417.2	ENSP00000322036.7	ENSP00000402953.2	ENSP00000322016.7	ENSP00000434359.1	ENSP00000432610.1	ENSP00000436131.1	ENSP00000487894.1	ENSP00000478495.1	ENSP00000478209.1	ENSP00000488339.1	ENSP00000484860.1	ENSP00000488903.1	ENSP00000488399.1	ENSP00000487945.1	ENSP00000487930.1	ENSP00000487637.1	ENSP00000488281.1	ENSP00000488027.1	ENSP00000437309.1	ENSP00000433403.1	ENSP00000434863.1 ENSPSIP00000005010.1 gopAga1_00005161-RC	gopAga1_00005161-RB	gopAga1_00005161-RA
OG0000263 XP_014462188.1	XP_014462189.1	XP_014462187.1	XP_014462186.1 ENSACAP00000005337.3 XP_005281508.1	XP_005281509.1 ENSGALP00000022148.3 ENSP00000434011.1	ENSP00000462758.1	ENSP00000431335.1	ENSP00000435243.1	ENSP00000352667.3	ENSP00000346545.4	ENSP00000437063.1	ENSP00000380961.1	ENSP00000463137.1	ENSP00000435322.1	ENSP00000442393.1	ENSP00000372025.3	ENSP00000405882.1	ENSP00000380973.3	ENSP00000380964.4	ENSP00000380963.5	ENSP00000436951.1	ENSP00000432988.1	ENSP00000463780.1	ENSP00000463403.1	ENSP00000380967.3	ENSP00000431267.1	ENSP00000462780.1	ENSP00000436830.1	ENSP00000462223.1	ENSP00000435641.1	ENSP00000462374.1	ENSP00000380958.3	ENSP00000348273.2 ENSPSIP00000009276.1 gopAga1_00006059-RA	gopAga1_00006058-RA
OG0000264 XP_014464498.1	XP_014464499.1	XP_014464497.1	XP_014464496.1	XP_014464495.1	XP_014464494.1 ENSACAP00000007336.3 XP_008161124.1	XP_008161122.1	XP_008161123.1	XP_008161119.1	XP_008161118.1	XP_008161115.1	XP_008161114.1	XP_008161117.1	XP_008161116.1	XP_008161111.1	XP_008161110.1	XP_008161113.1	XP_008161112.1	XP_008161120.1	XP_005291013.2	XP_008161107.1	XP_008161108.1	XP_008161109.1	XP_008161103.1	XP_008161106.1	XP_008161104.1	XP_008161105.1 ENSGALP00000011849.4 ENSP00000364549.3	ENSP00000348128.4	ENSP00000364547.3	ENSP00000488171.1 ENSPSIP00000018360.1	ENSPSIP00000018345.1 gopAga1_00015745-RB	gopAga1_00015745-RC	gopAga1_00015745-RA	gopAga1_00015745-RD
OG0000265 XP_014465118.1	XP_014465111.1	XP_014465114.1	XP_014465115.1	XP_014465112.1	XP_014465113.1	XP_014465116.1	XP_014465117.1 ENSACAP00000016345.3 XP_005304684.1	XP_005304685.1	XP_005304692.1	XP_005304688.1	XP_005304689.1	XP_005304690.1	XP_005304691.1	XP_005304686.1	XP_005304687.1	XP_008170346.1	XP_008170347.1 ENSGALP00000007220.4 ENSP00000479197.1	ENSP00000361093.5	ENSP00000439800.1	ENSP00000379577.4	ENSP00000392964.2	ENSP00000482048.1	ENSP00000312237.7	ENSP00000354166.3	ENSP00000420095.2	ENSP00000262975.4	ENSP00000443086.3	ENSP00000335537.3	ENSP00000479806.2	ENSP00000418210.1	ENSP00000396725.3	ENSP00000418495.2	ENSP00000348246.4 ENSPSIP00000013249.1 gopAga1_00012060-RA
OG0000266 XP_014466350.1	XP_014466349.1 XP_008176020.1	XP_008176021.1	XP_008175231.1	XP_005313807.1	XP_005315194.1	XP_005314316.1	XP_008175495.1	XP_005314317.2	XP_008175182.1	XP_008175184.1	XP_008174406.1	XP_008175760.1	XP_008176019.1	XP_008174660.1	XP_008174661.1	XP_008174662.1	XP_008176213.1	XP_005296119.1	XP_005314305.2	XP_008174659.1	XP_008174658.1	XP_008175543.1	XP_005313956.1 ENSP00000340758.4	ENSP00000253673.4	ENSP00000471853.1	ENSP00000396208.2 ENSPSIP00000006667.1	ENSPSIP00000013072.1	ENSPSIP00000009114.1	ENSPSIP00000007804.1	ENSPSIP00000011960.1	ENSPSIP00000020440.1	ENSPSIP00000013467.1 gopAga1_00019783-RA	gopAga1_00011075-RA	gopAga1_00019992-RA	gopAga1_00017132-RA
OG0000267 ENSP00000484784.1	ENSP00000415507.1	ENSP00000408514.1	ENSP00000400675.1	ENSP00000393107.1	ENSP00000480915.1	ENSP00000478814.1	ENSP00000482853.1	ENSP00000414408.1	ENSP00000390018.1	ENSP00000478762.1	ENSP00000482193.1	ENSP00000372749.2	ENSP00000382654.1	ENSP00000449655.2	ENSP00000448472.2	ENSP00000400272.1	ENSP00000410028.1	ENSP00000479509.1	ENSP00000477696.1	ENSP00000480415.1	ENSP00000478475.1	ENSP00000485011.1	ENSP00000483277.1	ENSP00000479242.1	ENSP00000406760.1	ENSP00000416682.1	ENSP00000364146.4	ENSP00000432566.1	ENSP00000432814.1	ENSP00000435103.1	ENSP00000431199.1	ENSP00000364155.4	ENSP00000415517.2	ENSP00000411164.2	ENSP00000372611.3	ENSP00000449235.1	ENSP00000410514.2	ENSP00000482001.1	ENSP00000480403.1
OG0000268 XP_006272114.2	XP_014458337.1	XP_014458336.1	XP_014458339.1	XP_014458338.1	XP_006258382.1 ENSACAP00000001904.3	ENSACAP00000004037.2 XP_005282647.1	XP_005282645.1	XP_005282646.1	XP_008164113.1	XP_008164117.1	XP_008164114.1	XP_008164115.1	XP_008164118.1	XP_008164119.1	XP_008164124.1	XP_008164116.1	XP_008163299.1	XP_008164123.1	XP_008164122.1	XP_008164121.1	XP_008164120.1 ENSGALP00000004815.4 ENSP00000387282.2	ENSP00000387154.1	ENSP00000312059.7	ENSP00000387218.1	ENSP00000362775.3	ENSP00000405429.1	ENSP00000300176.4	ENSP00000388594.1	ENSP00000394453.1 ENSPSIP00000005698.1	ENSPSIP00000007189.1 gopAga1_00015705-RA	gopAga1_00015705-RB	gopAga1_00019371-RA
OG0000269 XP_014451449.1	XP_014460682.1	XP_014460681.1	XP_006259198.2	XP_006259197.1	XP_014460676.1	XP_014460674.1	XP_014460675.1 ENSACAP00000012930.2	ENSACAP00000013098.3	ENSACAP00000022071.1	ENSACAP00000013017.2 XP_008171751.1	XP_008171752.1	XP_005283429.1	XP_005302869.1	XP_005302868.1	XP_005302870.1	XP_008171753.1	XP_008176018.1 ENSGALP00000033213.2	ENSGALP00000005246.4	ENSGALP00000005245.4 ENSP00000209929.8	ENSP00000356724.3	ENSP00000346901.4	ENSP00000356723.3	ENSP00000356729.4	ENSP00000385543.2	ENSP00000481732.1 ENSPSIP00000006556.1	ENSPSIP00000006549.1	ENSPSIP00000011924.1	ENSPSIP00000008439.1	ENSPSIP00000011419.1 gopAga1_00012534-RA	gopAga1_00012535-RA	gopAga1_00012531-RA	gopAga1_00012532-RA
OG0000270 XP_006259615.1	XP_014452820.1	XP_014452817.1	XP_006267711.1	XP_014452819.1	XP_014466625.1	XP_014452818.1 ENSACAP00000008705.2	ENSACAP00000012335.1 XP_008169264.1	XP_008169265.1	XP_008169266.1	XP_008169267.1	XP_005309707.1	XP_005306677.1 ENSGALP00000036116.1	ENSGALP00000005647.4	ENSGALP00000021767.3 ENSP00000379256.1	ENSP00000310587.3	ENSP00000362566.3	ENSP00000428105.1	ENSP00000429255.1	ENSP00000220931.6	ENSP00000430476.1	ENSP00000428781.1	ENSP00000371184.3	ENSP00000310749.3	ENSP00000416359.2	ENSP00000482993.1	ENSP00000478231.1	ENSP00000483786.1 ENSPSIP00000007061.1	ENSPSIP00000003839.1	ENSPSIP00000004874.1 gopAga1_00003845-RA	gopAga1_00017379-RB	gopAga1_00017379-RA	gopAga1_00018166-RA
OG0000271 XP_014463559.1	XP_006260247.2	XP_014449093.1	XP_014449095.1	XP_014449094.1	XP_006265891.1 ENSACAP00000008734.2 XP_008171119.1	XP_008177113.1	XP_008177112.1	XP_008177110.1	XP_008171120.1	XP_005278883.1	XP_005278882.1	XP_005278887.1	XP_005278884.1	XP_005278881.1	XP_005278880.1 ENSGALP00000003721.4	ENSGALP00000032938.3 ENSP00000335652.7	ENSP00000340626.4	ENSP00000355183.4	ENSP00000380891.3	ENSP00000344666.4	ENSP00000384029.1	ENSP00000384797.3	ENSP00000354897.4	ENSP00000354529.4 ENSPSIP00000015184.1	ENSPSIP00000015172.1	ENSPSIP00000015671.1 gopAga1_00009473-RE	gopAga1_00009473-RA	gopAga1_00009473-RD	gopAga1_00009473-RF	gopAga1_00015692-RA	gopAga1_00009473-RB	gopAga1_00009473-RC
OG0000272 XP_014461763.1	XP_014461762.1	XP_014461764.1	XP_014461761.1	XP_014464167.1	XP_006265632.2	XP_006260316.1	XP_006260317.1 ENSACAP00000002825.3 XP_005296821.1	XP_005296822.1	XP_005296823.1	XP_005296824.1	XP_005296825.1	XP_005296826.1	XP_005296827.1	XP_005296828.1	XP_008173649.1	XP_008173647.1	XP_008173646.1	XP_008173643.1	XP_005279620.1	XP_008173648.1	XP_008173645.1	XP_008173644.1 ENSGALP00000016509.3 ENSP00000397783.3	ENSP00000371629.1	ENSP00000489256.1	ENSP00000392837.2	ENSP00000466963.1	ENSP00000343896.4	ENSP00000395654.1	ENSP00000445036.2	ENSP00000464778.1	ENSP00000349788.2 ENSPSIP00000006080.1	ENSPSIP00000006802.1 gopAga1_00007931-RA
OG0000273 XP_006261400.1	XP_014465414.1	XP_014463268.1 ENSACAP00000001334.2	ENSACAP00000001249.2	ENSACAP00000001483.3 XP_008173844.1	XP_008173843.1	XP_005311530.1	XP_008173841.1	XP_008173840.1	XP_008165408.1	XP_005313458.1	XP_005311536.1	XP_005311532.1	XP_005311531.1	XP_005311535.1	XP_005311534.1	XP_008173842.1 ENSGALP00000006123.4	ENSGALP00000029644.3 ENSP00000312678.4	ENSP00000484712.1	ENSP00000414521.2	ENSP00000483707.1	ENSP00000370164.1	ENSP00000370159.1	ENSP00000391154.1	ENSP00000413976.2	ENSP00000370156.1	ENSP00000370157.1	ENSP00000370162.1	ENSP00000262843.6	ENSP00000410730.1 ENSPSIP00000005316.1	ENSPSIP00000007781.1 gopAga1_00012664-RA	gopAga1_00011166-RA	gopAga1_00006631-RA
OG0000274 XP_006261464.2	XP_014457772.1	XP_014457770.1	XP_014457771.1	XP_014457768.1	XP_014457769.1 ENSACAP00000002824.3 XP_005302359.1	XP_008161138.1	XP_008161126.1	XP_008161121.1	XP_008161157.1	XP_008161178.1	XP_005302372.1	XP_005302371.1	XP_005302368.1	XP_005302367.1	XP_005302370.1	XP_005302369.1	XP_005302363.1	XP_005302362.1	XP_005302366.1	XP_005302364.1	XP_005302357.1	XP_008161186.1	XP_008161146.1	XP_005302356.1	XP_005302355.1	XP_008161140.1	XP_005302373.1	XP_005302361.1	XP_005302360.1 ENSGALP00000013303.4 ENSP00000310933.4	ENSP00000384435.1	ENSP00000343902.4	ENSP00000378745.3 ENSPSIP00000012410.1 gopAga1_00001589-RA
OG0000275 XP_006261610.1 ENSACAP00000003374.2 XP_005300702.1	XP_005288268.1	XP_008168710.1	XP_008168711.1 ENSGALP00000033888.2 ENSP00000486307.1	ENSP00000487461.1	ENSP00000485774.1	ENSP00000487374.1	ENSP00000321791.8	ENSP00000428386.1	ENSP00000422339.2	ENSP00000426322.1	ENSP00000386044.1	ENSP00000384300.1	ENSP00000400178.1	ENSP00000386290.1	ENSP00000386783.1	ENSP00000481118.1	ENSP00000485848.1	ENSP00000423882.1	ENSP00000421563.1	ENSP00000370127.5	ENSP00000484959.1	ENSP00000482045.1	ENSP00000482392.1	ENSP00000484864.1	ENSP00000483645.1	ENSP00000478335.1	ENSP00000482995.2	ENSP00000249786.4	ENSP00000370764.1	ENSP00000386316.1	ENSP00000486523.1	ENSP00000486174.1 ENSPSIP00000016580.1 gopAga1_00016918-RA
OG0000276 XP_014461619.1	XP_014461598.1	XP_014461606.1	XP_014460904.1	XP_006272637.2	XP_006263053.1	XP_014461612.1	XP_014459515.1 ENSACAP00000019753.1 XP_005292270.1	XP_005292269.1	XP_005292268.1 ENSGALP00000035594.1	ENSGALP00000027972.2 ENSP00000332963.4	ENSP00000481833.1	ENSP00000416935.2	ENSP00000440337.1	ENSP00000321957.7	ENSP00000411161.3	ENSP00000481114.1	ENSP00000443307.1	ENSP00000441547.1	ENSP00000405638.2	ENSP00000438568.1	ENSP00000444794.1	ENSP00000377286.2	ENSP00000308137.4	ENSP00000377281.3	ENSP00000377284.1	ENSP00000414094.2	ENSP00000298223.6 ENSPSIP00000002358.1	ENSPSIP00000002352.1	ENSPSIP00000002348.1	ENSPSIP00000002359.1	ENSPSIP00000002346.1 gopAga1_00003253-RA	gopAga1_00017102-RA
OG0000277 XP_014464458.1	XP_006268675.1 ENSACAP00000017643.3	ENSACAP00000005627.3 XP_005297178.1	XP_005297176.1	XP_005297177.1 ENSGALP00000000502.3	ENSGALP00000009064.2 ENSP00000462016.1	ENSP00000344068.5	ENSP00000480752.1	ENSP00000484097.1	ENSP00000479052.1	ENSP00000477786.1	ENSP00000484387.1	ENSP00000239167.7	ENSP00000488342.1	ENSP00000478177.1	ENSP00000488912.1	ENSP00000483802.1	ENSP00000488779.1	ENSP00000293493.8	ENSP00000426498.3	ENSP00000340522.6	ENSP00000344304.4	ENSP00000340943.4	ENSP00000463852.1	ENSP00000381333.3	ENSP00000418722.1	ENSP00000480396.1	ENSP00000488353.1	ENSP00000481116.1	ENSP00000480241.1	ENSP00000326060.5 ENSPSIP00000010823.1	ENSPSIP00000015019.1	ENSPSIP00000009698.1 gopAga1_00015536-RA
OG0000278 XP_014454314.1	XP_006269540.1	XP_006271433.2	XP_006271431.2	XP_006271432.2	XP_014460106.1 ENSACAP00000006639.3	ENSACAP00000011395.3	ENSACAP00000002886.1 XP_005279247.1	XP_005279246.1	XP_008174142.1	XP_005285861.1	XP_008168691.1	XP_005300589.1 ENSGALP00000036651.1	ENSGALP00000031235.3 ENSP00000263826.5	ENSP00000471369.1	ENSP00000399532.2	ENSP00000479922.1	ENSP00000384293.2	ENSP00000450688.1	ENSP00000385326.2	ENSP00000451828.1	ENSP00000270202.4	ENSP00000375892.2	ENSP00000336943.5	ENSP00000355497.1	ENSP00000309428.6	ENSP00000451166.1	ENSP00000355498.1	ENSP00000479081.1	ENSP00000483054.1 ENSPSIP00000008474.1	ENSPSIP00000005472.1 gopAga1_00015667-RA	gopAga1_00010456-RA	gopAga1_00015667-RB
OG0000279 XP_014453733.1	XP_006274274.1	XP_014451667.1 ENSACAP00000014686.2	ENSACAP00000017179.2	ENSACAP00000012157.2 XP_005314681.1	XP_005314680.1	XP_005292200.1	XP_008171594.1	XP_005298323.1 ENSGALP00000025010.3	ENSGALP00000043256.1	ENSGALP00000036836.2 ENSP00000226253.4	ENSP00000378729.3	ENSP00000378731.2	ENSP00000363988.4	ENSP00000481363.1	ENSP00000378669.1	ENSP00000336927.5	ENSP00000455724.1	ENSP00000455700.1	ENSP00000455800.2	ENSP00000378661.3	ENSP00000455917.1	ENSP00000457468.2	ENSP00000455857.1	ENSP00000485952.1	ENSP00000400452.2 ENSPSIP00000009618.1	ENSPSIP00000009613.1	ENSPSIP00000008108.1	ENSPSIP00000020035.1 gopAga1_00000466-RC	gopAga1_00000466-RD	gopAga1_00000466-RB	gopAga1_00000466-RE	gopAga1_00011258-RA
OG0000280 XP_014455577.1	XP_006276359.1	XP_014453420.1 ENSACAP00000002484.2	ENSACAP00000015630.2 XP_005309825.1	XP_008172873.1	XP_008172872.1	XP_008172871.1	XP_008172876.1	XP_008172875.1	XP_008172874.1	XP_005310603.1 ENSGALP00000031964.3 ENSP00000310244.5	ENSP00000452859.1	ENSP00000453583.1	ENSP00000452721.1	ENSP00000388540.2	ENSP00000465772.1	ENSP00000468483.1	ENSP00000484345.1	ENSP00000479888.1	ENSP00000467604.1	ENSP00000479078.1	ENSP00000466928.1	ENSP00000465742.1	ENSP00000444762.2	ENSP00000416463.2	ENSP00000481053.1	ENSP00000411878.2	ENSP00000445966.1	ENSP00000479844.1	ENSP00000293062.9 ENSPSIP00000005899.1	ENSPSIP00000019841.1 gopAga1_00009101-RB	gopAga1_00009931-RA	gopAga1_00009101-RA
OG0000281 XP_006277699.1 ENSACAP00000016288.2 XP_005312659.1 ENSP00000486703.1	ENSP00000483179.1	ENSP00000486233.1	ENSP00000482023.1	ENSP00000486181.1	ENSP00000482274.1	ENSP00000480135.1	ENSP00000485843.1	ENSP00000483297.1	ENSP00000481764.1	ENSP00000478449.1	ENSP00000486598.1	ENSP00000479917.1	ENSP00000487085.1	ENSP00000302896.4	ENSP00000406159.1	ENSP00000480662.1	ENSP00000481822.1	ENSP00000482338.1	ENSP00000481194.1	ENSP00000486704.1	ENSP00000479899.1	ENSP00000482953.1	ENSP00000481553.1	ENSP00000482475.1	ENSP00000375632.1	ENSP00000383937.1	ENSP00000391823.1	ENSP00000375633.2	ENSP00000486047.1	ENSP00000485771.1	ENSP00000481655.1	ENSP00000486773.1	ENSP00000484394.1 ENSPSIP00000006445.1 gopAga1_00016874-RA
OG0000282 XP_014451243.1	XP_014451244.1 ENSACAP00000017049.2 XP_005313937.1 ENSP00000409979.1	ENSP00000408094.1	ENSP00000477623.1	ENSP00000382931.1	ENSP00000382926.3	ENSP00000406335.2	ENSP00000372897.2	ENSP00000372896.2	ENSP00000398056.2	ENSP00000479808.1	ENSP00000364935.2	ENSP00000379229.1	ENSP00000364940.3	ENSP00000364934.2	ENSP00000400532.1	ENSP00000480256.1	ENSP00000413330.1	ENSP00000410965.1	ENSP00000484581.1	ENSP00000401292.2	ENSP00000404589.1	ENSP00000404037.1	ENSP00000416211.1	ENSP00000478930.1	ENSP00000409247.1	ENSP00000408357.1	ENSP00000406088.1	ENSP00000407429.2	ENSP00000391395.1	ENSP00000482255.1	ENSP00000407791.2	ENSP00000412217.1	ENSP00000479501.1	ENSP00000406968.1	ENSP00000400280.1
OG0000283 XP_014451377.1	XP_014464925.1	XP_014451379.1	XP_014451378.1	XP_014464926.1	XP_014464923.1	XP_014464924.1 ENSACAP00000004806.3	ENSACAP00000014411.3 XP_008164425.1	XP_008164644.1	XP_008164385.1	XP_008164319.1	XP_008164252.1	XP_008172950.1	XP_008164463.1	XP_008164594.1	XP_008164347.1	XP_008172948.1	XP_008164283.1	XP_008172949.1 ENSGALP00000017813.4	ENSGALP00000000286.4 ENSP00000327416.8	ENSP00000272198.6	ENSP00000471264.1	ENSP00000450337.1	ENSP00000356209.2	ENSP00000470427.1	ENSP00000402576.1	ENSP00000447273.2	ENSP00000385093.4	ENSP00000449338.1	ENSP00000388373.3	ENSP00000295706.4 ENSPSIP00000017604.1	ENSPSIP00000017470.1	ENSPSIP00000008164.1 gopAga1_00010063-RA
OG0000284 XP_014452508.1	XP_014454854.1	XP_014464670.1	XP_014453235.1 ENSACAP00000012657.3	ENSACAP00000013702.3 XP_008176679.1	XP_008176671.1	XP_008176672.1	XP_008176673.1	XP_008176674.1	XP_008176675.1	XP_008176676.1	XP_008176677.1	XP_008172791.1	XP_008176678.1	XP_008176680.1	XP_008176669.1	XP_008173433.1 ENSGALP00000042427.1	ENSGALP00000018034.4	ENSGALP00000030828.3 ENSP00000331727.5	ENSP00000333781.4	ENSP00000396900.2	ENSP00000318212.5	ENSP00000463533.1	ENSP00000262186.5	ENSP00000328531.4	ENSP00000387657.4	ENSP00000482818.1	ENSP00000483158.1	ENSP00000464672.1	ENSP00000463830.1 ENSPSIP00000004811.1	ENSPSIP00000011858.1 gopAga1_00002730-RA	gopAga1_00011314-RA	gopAga1_00016479-RA
OG0000285 XP_014456073.1	XP_014456075.1	XP_014456074.1	XP_014456077.1	XP_014456080.1	XP_014456081.1	XP_014456079.1	XP_014456078.1	XP_014456085.1	XP_014456084.1	XP_014456083.1	XP_014456082.1	XP_014456086.1 ENSACAP00000004142.3 XP_008176108.1	XP_008176124.1	XP_008176141.1	XP_008176102.1	XP_005299640.1	XP_008176144.1	XP_008176118.1	XP_008176136.1	XP_008176111.1	XP_008176114.1	XP_008176133.1	XP_008176130.1 ENSGALP00000025502.4	ENSGALP00000025501.4 ENSP00000428511.1	ENSP00000428215.1	ENSP00000430071.1	ENSP00000430255.1	ENSP00000428026.1	ENSP00000195649.6	ENSP00000400459.2	ENSP00000429776.1	ENSP00000358708.2 ENSPSIP00000007315.1 gopAga1_00001010-RA
OG0000286 XP_014466588.1	XP_014466589.1	XP_014466585.1	XP_014466584.1	XP_014466587.1	XP_014466586.1 ENSACAP00000011047.3 XP_008167518.1	XP_008167519.1	XP_008167513.1	XP_008167514.1	XP_008167515.1	XP_008167516.1	XP_008167517.1	XP_008167521.1	XP_008167520.1	XP_008167523.1	XP_008167522.1	XP_008167525.1	XP_008167524.1	XP_008167527.1	XP_008167526.1	XP_008167528.1 ENSGALP00000041845.1	ENSGALP00000009381.4 ENSP00000446358.1	ENSP00000444151.1	ENSP00000415208.1	ENSP00000439807.1	ENSP00000444717.1	ENSP00000320006.7	ENSP00000370410.3 ENSPSIP00000013764.1 gopAga1_00010149-RF	gopAga1_00010149-RE	gopAga1_00010149-RA	gopAga1_00010149-RD	gopAga1_00010149-RC	gopAga1_00010149-RB
OG0000287 XP_014467113.1	XP_014467112.1 ENSACAP00000009428.3 XP_008170852.1	XP_008170853.1	XP_008170841.1	XP_008170851.1	XP_008170850.1	XP_008170848.1	XP_008170849.1	XP_008170844.1	XP_008170846.1	XP_008170847.1	XP_008170842.1	XP_008170843.1	XP_005306061.1	XP_005306060.1	XP_008170839.1	XP_008170838.1	XP_008170856.1	XP_008170855.1	XP_008170854.1	XP_008170835.1	XP_008170834.1	XP_008170837.1	XP_008170836.1	XP_005306056.1	XP_005306057.1	XP_005306051.1	XP_005306055.1 ENSGALP00000025853.3 ENSP00000487907.1	ENSP00000425205.1	ENSP00000427018.3	ENSP00000386228.2	ENSP00000262231.10	ENSP00000423559.1	ENSP00000487079.1 ENSPSIP00000016626.1
OG0000288 XP_006258599.2 ENSACAP00000016297.3 XP_008177564.1	XP_008177569.1	XP_008177562.1	XP_008177563.1	XP_005300897.1	XP_005300896.1	XP_008177565.1	XP_005300887.1	XP_005300888.1	XP_005300885.1	XP_005300886.1	XP_005300890.1	XP_005300894.1	XP_008177572.1 ENSGALP00000020453.4 ENSP00000405651.2	ENSP00000352328.4	ENSP00000413035.2	ENSP00000475142.1	ENSP00000384944.2	ENSP00000407855.2	ENSP00000391670.2	ENSP00000485984.1	ENSP00000482053.2	ENSP00000262829.7	ENSP00000380470.2	ENSP00000479761.1	ENSP00000485711.1	ENSP00000485961.1	ENSP00000487328.1	ENSP00000487477.1	ENSP00000486570.1	ENSP00000486468.1 ENSPSIP00000020151.1	ENSPSIP00000020164.1 gopAga1_00012142-RA
OG0000289 XP_014456951.1	XP_014456952.1	XP_014456953.1	XP_014456954.1	XP_006261122.1	XP_014453129.1	XP_006269687.1 ENSACAP00000011904.2	ENSACAP00000009303.1 XP_008169618.1	XP_008169619.1	XP_005290374.1	XP_005290371.1	XP_005295859.1	XP_008169625.1	XP_008169624.1	XP_008169623.1	XP_008169622.1	XP_008169621.1	XP_008169620.1 ENSGALP00000019580.3	ENSGALP00000019573.4	ENSGALP00000007278.3	ENSGALP00000008174.3 ENSP00000264363.2	ENSP00000310657.6	ENSP00000296499.5	ENSP00000299641.5	ENSP00000475031.1	ENSP00000428604.1	ENSP00000261797.6 ENSPSIP00000008512.1	ENSPSIP00000011455.1	ENSPSIP00000016829.1	ENSPSIP00000011901.1 gopAga1_00005698-RA	gopAga1_00001029-RB	gopAga1_00001029-RA
OG0000290 XP_006262384.1	XP_014463794.1	XP_014463792.1	XP_014463793.1 ENSACAP00000016806.3	ENSACAP00000016804.3 XP_008161540.1	XP_005281414.1	XP_005281413.1	XP_005281412.1	XP_005281411.1	XP_005281410.1	XP_008161539.1	XP_008161538.1 ENSGALP00000017751.4	ENSGALP00000017747.4 ENSP00000475362.1	ENSP00000370308.3	ENSP00000360226.1	ENSP00000380781.2	ENSP00000467512.1	ENSP00000473830.1	ENSP00000351354.4	ENSP00000481181.1	ENSP00000468794.1	ENSP00000466389.1	ENSP00000465616.1	ENSP00000465094.1	ENSP00000466735.1	ENSP00000353219.4	ENSP00000474461.1	ENSP00000467785.1	ENSP00000468707.1 ENSPSIP00000015556.1 gopAga1_00011143-RA	gopAga1_00011142-RA	gopAga1_00003920-RA	gopAga1_00000043-RA
OG0000291 XP_006269765.1	XP_014460016.1	XP_014460017.1	XP_014460019.1	XP_014460018.1	XP_006262781.1	XP_006262779.1 ENSACAP00000010162.3	ENSACAP00000022291.1 XP_008174127.1	XP_005293806.1	XP_005293805.1	XP_005293804.1	XP_005293803.1	XP_008168570.1	XP_008174126.1 ENSGALP00000000534.4	ENSGALP00000000056.4 ENSP00000471099.1	ENSP00000368429.3	ENSP00000340633.4	ENSP00000222305.2	ENSP00000471511.1	ENSP00000435005.1	ENSP00000432533.1	ENSP00000470081.1	ENSP00000471775.1	ENSP00000470277.1	ENSP00000469364.2	ENSP00000433041.1	ENSP00000356998.1	ENSP00000357000.3	ENSP00000356999.1 ENSPSIP00000008984.1	ENSPSIP00000008998.1	ENSPSIP00000009624.1 gopAga1_00018045-RA	gopAga1_00011136-RA
OG0000292 XP_014449340.1	XP_006264581.1	XP_014465519.1 ENSACAP00000015084.1	ENSACAP00000015690.3 XP_005307446.1	XP_005307447.1	XP_005313594.1	XP_005307437.1	XP_005307438.1	XP_005307439.1	XP_005307440.1	XP_005307442.1	XP_005307444.1	XP_005307445.1	XP_005307436.1	XP_008175425.1	XP_008175426.1	XP_008175427.1	XP_005307435.1	XP_005307443.1	XP_008164303.1	XP_008164302.1	XP_008164301.1	XP_008164300.1 ENSGALP00000014974.3	ENSGALP00000029287.3 ENSP00000433102.1	ENSP00000445460.1	ENSP00000352508.3	ENSP00000415812.2	ENSP00000339659.5	ENSP00000340797.3 ENSPSIP00000017704.1 gopAga1_00019380-RB	gopAga1_00019380-RA	gopAga1_00006946-RA	gopAga1_00006946-RB
OG0000293 XP_006265538.1	XP_014453590.1	XP_014453589.1	XP_014451908.1	XP_014451909.1	XP_014451910.1	XP_006276316.1	XP_014451907.1 ENSACAP00000006706.3	ENSACAP00000000310.3 XP_005289611.1	XP_005289610.1	XP_005289609.1	XP_005289608.1	XP_008166389.1	XP_008173264.1	XP_005289612.1	XP_008166391.1	XP_008166392.1	XP_005308054.1 ENSGALP00000018621.3	ENSGALP00000014905.4	ENSGALP00000038574.2 ENSP00000345133.5	ENSP00000335341.6	ENSP00000355731.3	ENSP00000355728.3	ENSP00000355726.3	ENSP00000355237.2 ENSPSIP00000017969.1	ENSPSIP00000014884.1	ENSPSIP00000019727.1	ENSPSIP00000019734.1	ENSPSIP00000017953.1 gopAga1_00002918-RA	gopAga1_00008002-RC	gopAga1_00009551-RA	gopAga1_00008002-RB
OG0000294 XP_014456488.1	XP_014456599.1	XP_006265818.1 ENSACAP00000022665.1	ENSACAP00000001336.3	ENSACAP00000007649.1	ENSACAP00000014925.2	ENSACAP00000022847.1 XP_005303221.1	XP_005303220.1	XP_005303219.1	XP_005303218.1	XP_005303217.1	XP_005303216.1	XP_005303215.1	XP_005297869.1	XP_005297870.1	XP_008169674.1	XP_008169950.1	XP_005297871.1	XP_005303598.1 ENSGALP00000040646.1	ENSGALP00000030045.3	ENSGALP00000042380.1 ENSP00000449516.1	ENSP00000449310.1	ENSP00000447280.1	ENSP00000485030.1	ENSP00000417496.1	ENSP00000418575.1	ENSP00000447584.1	ENSP00000355042.3	ENSP00000393987.3	ENSP00000447305.1 ENSPSIP00000003894.1	ENSPSIP00000016895.1	ENSPSIP00000015675.1 gopAga1_00015050-RA
OG0000295 XP_014465415.1	XP_014461391.1	XP_014450360.1	XP_006265994.1 ENSACAP00000018110.2	ENSACAP00000014512.3	ENSACAP00000006882.2 XP_008170058.1	XP_008170059.1	XP_008166680.1	XP_005304110.1	XP_005304113.1	XP_008166676.1	XP_008166679.1	XP_008166678.1	XP_008166677.1	XP_005295951.1	XP_008170061.1	XP_008170060.1 ENSGALP00000027793.2	ENSGALP00000027797.4	ENSGALP00000006868.4	ENSGALP00000022061.4 ENSP00000489369.1	ENSP00000432586.1	ENSP00000489343.1	ENSP00000406229.2	ENSP00000261800.5	ENSP00000479573.1	ENSP00000387040.2 ENSPSIP00000009055.1	ENSPSIP00000004658.1	ENSPSIP00000004655.1	ENSPSIP00000006783.1	ENSPSIP00000006773.1 gopAga1_00015596-RA	gopAga1_00010826-RA	gopAga1_00005095-RA
OG0000296 XP_014466867.1	XP_006276445.1	XP_006276446.1	XP_006276450.1	XP_006276448.1	XP_006276449.1	XP_006267149.1	XP_014456018.1	XP_014466868.1	XP_014463179.1 ENSACAP00000010097.3	ENSACAP00000006908.2	ENSACAP00000014341.3 XP_005292472.1	XP_005282288.1	XP_005292477.1	XP_005292474.1	XP_005292473.1	XP_005305920.1	XP_005305919.1 ENSGALP00000012349.3	ENSGALP00000025299.3	ENSGALP00000015832.4 ENSP00000290921.6	ENSP00000434630.1	ENSP00000357816.5	ENSP00000372411.3	ENSP00000410474.2	ENSP00000436285.1	ENSP00000338615.5 ENSPSIP00000011078.1	ENSPSIP00000011189.1	ENSPSIP00000011193.1	ENSPSIP00000010610.1 gopAga1_00013876-RA	gopAga1_00013876-RB	gopAga1_00003359-RB	gopAga1_00003359-RA
OG0000297 XP_014455940.1	XP_014455939.1	XP_014455938.1	XP_014455937.1	XP_014455790.1	XP_006269779.1 ENSACAP00000007300.3 XP_008170317.1	XP_008170319.1	XP_005304725.1	XP_008170315.1	XP_005304726.1	XP_008170316.1	XP_008170318.1	XP_008170320.1	XP_008170321.1	XP_008170322.1	XP_008170323.1	XP_005309731.1 ENSGALP00000027049.4	ENSGALP00000035792.1	ENSGALP00000035789.2 ENSP00000415366.1	ENSP00000408101.1	ENSP00000410461.1	ENSP00000387131.1	ENSP00000386380.1	ENSP00000386478.1	ENSP00000386776.1	ENSP00000413348.2	ENSP00000387611.1	ENSP00000264257.2 ENSPSIP00000019158.1	ENSPSIP00000019412.1	ENSPSIP00000019377.1 gopAga1_00013594-RA	gopAga1_00013593-RA	gopAga1_00018544-RA
OG0000298 XP_014451301.1	XP_014450018.1	XP_014461701.1 ENSACAP00000015941.3 XP_008163185.1	XP_008163184.1	XP_008163186.1	XP_008163181.1	XP_008163180.1	XP_008163183.1	XP_008163182.1	XP_005299316.1	XP_005299315.1	XP_005299314.1	XP_005299313.1	XP_005315131.1 ENSGALP00000015110.4 ENSP00000487176.1	ENSP00000459102.1	ENSP00000387370.1	ENSP00000409720.1	ENSP00000281111.7	ENSP00000303600.6	ENSP00000419990.1	ENSP00000399511.2	ENSP00000284483.8	ENSP00000345352.6	ENSP00000349880.5	ENSP00000418156.1	ENSP00000418378.1	ENSP00000418916.1	ENSP00000489579.1	ENSP00000389752.1 ENSPSIP00000020638.1	ENSPSIP00000003797.1	ENSPSIP00000020639.1 gopAga1_00013135-RB	gopAga1_00013135-RA
OG0000299 XP_014452198.1	XP_014461770.1	XP_014461771.1	XP_014459913.1	XP_014459912.1	XP_014455578.1	XP_014450917.1 ENSACAP00000021000.1	ENSACAP00000003508.2	ENSACAP00000003510.2	ENSACAP00000002071.2	ENSACAP00000002512.2	ENSACAP00000003041.2	ENSACAP00000020210.1	ENSACAP00000015315.3 XP_008173846.1	XP_008161334.1	XP_008167947.1	XP_005310601.1 ENSGALP00000005342.4	ENSGALP00000017561.4 ENSP00000483166.1	ENSP00000489346.1	ENSP00000489529.1	ENSP00000373884.5	ENSP00000471601.1	ENSP00000489262.1	ENSP00000353174.7	ENSP00000355533.2	ENSP00000399610.3	ENSP00000347667.3	ENSP00000352608.2	ENSP00000470927.1	ENSP00000354254.4 ENSPSIP00000015323.1	ENSPSIP00000013384.1	ENSPSIP00000013340.1 gopAga1_00009929-RA
OG0000300 XP_014458914.1	XP_014456873.1 ENSACAP00000008314.3	ENSACAP00000015288.2 XP_005300635.1	XP_005285794.1	XP_008170424.1 ENSGALP00000039705.2	ENSGALP00000043471.1	ENSGALP00000041566.1	ENSGALP00000039702.2	ENSGALP00000007968.4	ENSGALP00000040990.1	ENSGALP00000041971.1	ENSGALP00000002369.4 ENSP00000429951.1	ENSP00000382770.3	ENSP00000428552.1	ENSP00000361520.1	ENSP00000396608.1	ENSP00000361514.1	ENSP00000473714.1	ENSP00000346321.6	ENSP00000485867.1	ENSP00000385552.4	ENSP00000385806.2	ENSP00000361480.3	ENSP00000402150.1	ENSP00000361517.1	ENSP00000385717.3	ENSP00000361485.2	ENSP00000361498.5	ENSP00000286628.8	ENSP00000286627.5 ENSPSIP00000002076.1	ENSPSIP00000015769.1 gopAga1_00006284-RA	gopAga1_00001339-RA
OG0000301 XP_014458224.1 ENSACAP00000006708.2 XP_008168944.1	XP_008168941.1	XP_008168953.1	XP_008168950.1	XP_008168938.1	XP_008168940.1	XP_008168965.1	XP_008168964.1	XP_008168961.1	XP_008168963.1	XP_008168962.1	XP_008168947.1	XP_008168946.1	XP_008168942.1	XP_008168945.1	XP_008168960.1	XP_008168954.1	XP_008168955.1	XP_008168956.1	XP_008168957.1	XP_008168943.1	XP_008168951.1	XP_008168952.1	XP_008168939.1	XP_008168936.1	XP_008168937.1	XP_008168958.1	XP_008168959.1	XP_008168949.1	XP_008168948.1 ENSGALP00000007565.4 ENSP00000355668.5	ENSP00000284548.11	ENSP00000409493.1	ENSP00000455507.2 gopAga1_00004437-RA
OG0000302 XP_014459977.1	XP_014459976.1	XP_014459975.1	XP_014459979.1	XP_014459978.1 ENSACAP00000020487.2 XP_008164996.1	XP_008164994.1	XP_008164995.1	XP_005281020.1	XP_005281021.1	XP_005281024.1	XP_005281025.1 ENSGALP00000003366.4 ENSP00000488352.1	ENSP00000478378.1	ENSP00000487757.1	ENSP00000477557.1	ENSP00000484549.1	ENSP00000483857.1	ENSP00000478598.1	ENSP00000477715.1	ENSP00000481010.1	ENSP00000483590.1	ENSP00000488785.1	ENSP00000482116.1	ENSP00000479625.1	ENSP00000488484.1	ENSP00000482965.2	ENSP00000488842.1	ENSP00000478558.1	ENSP00000488102.1	ENSP00000483951.1	ENSP00000481009.1	ENSP00000454786.1 ENSPSIP00000018807.1 gopAga1_00012787-RA	gopAga1_00012787-RB
OG0000303 XP_014465026.1	XP_014465027.1	XP_014465029.1	XP_014465028.1 ENSACAP00000005855.3 XP_008176832.1	XP_008176830.1	XP_008176831.1	XP_005309625.1	XP_005309626.1	XP_005309628.1	XP_005309630.1	XP_005309624.1	XP_005309633.1 ENSGALP00000009339.3 ENSP00000353668.3	ENSP00000339611.4	ENSP00000352035.2	ENSP00000349789.3	ENSP00000487142.1	ENSP00000359244.2	ENSP00000486194.1	ENSP00000486040.1	ENSP00000486706.1	ENSP00000345523.5	ENSP00000486010.1	ENSP00000485756.1	ENSP00000486464.1	ENSP00000359419.1	ENSP00000487095.1	ENSP00000486949.1	ENSP00000487078.1	ENSP00000486636.1	ENSP00000486451.1	ENSP00000485832.1	ENSP00000487545.1 ENSPSIP00000013308.1 gopAga1_00014756-RA
OG0000304 XP_014463422.1	XP_014460028.1	XP_014463424.1	XP_014460026.1	XP_014457136.1	XP_014457137.1	XP_014457138.1	XP_014466389.1	XP_014461103.1	XP_014461079.1	XP_006277594.1	XP_014462791.1	XP_014459091.1	XP_006261390.2	XP_006277592.2	XP_006277593.1	XP_014458773.1	XP_006277590.1	XP_014461096.1	XP_014459087.1	XP_014460029.1	XP_014460031.1	XP_006259713.2	XP_006259714.2	XP_014458772.1	XP_014460035.1	XP_014460036.1	XP_014460027.1	XP_006263043.1	XP_014459563.1	XP_014459562.1	XP_014459565.1	XP_014459561.1	XP_014459560.1	XP_014461075.1	XP_014459548.1	XP_006263331.2
OG0000305 XP_006260143.1	XP_006264238.2	XP_014455694.1	XP_014455693.1	XP_006260142.1 ENSACAP00000014933.2	ENSACAP00000012061.2	ENSACAP00000008290.2 XP_008176533.1	XP_008161855.1	XP_008161854.1	XP_005290238.1	XP_005298292.1	XP_005298291.1	XP_005298290.1	XP_005298625.1 ENSGALP00000022935.4	ENSGALP00000007822.3	ENSGALP00000043192.1 ENSP00000219150.5	ENSP00000462627.1	ENSP00000261401.3	ENSP00000344562.5	ENSP00000415554.2	ENSP00000377471.1	ENSP00000394496.2	ENSP00000455552.1	ENSP00000340211.5	ENSP00000447534.1	ENSP00000463723.1	ENSP00000438341.1	ENSP00000373419.3 ENSPSIP00000002792.1	ENSPSIP00000005605.1 gopAga1_00010176-RA	gopAga1_00002147-RA	gopAga1_00007869-RA
OG0000306 XP_006261549.1	XP_006271503.2	XP_006272693.1	XP_014453282.1 ENSACAP00000005118.2	ENSACAP00000004320.2	ENSACAP00000018464.2	ENSACAP00000018673.2 XP_005313970.1	XP_005314759.1	XP_005293877.1	XP_005313626.1	XP_008175680.1	XP_008175742.1	XP_008176381.1	XP_005312760.1	XP_005314339.1	XP_008175571.1	XP_008175120.1	XP_008168619.1 ENSP00000471425.1	ENSP00000244314.5 ENSPSIP00000007503.1	ENSPSIP00000000001.1	ENSPSIP00000009348.1	ENSPSIP00000009963.1	ENSPSIP00000011553.1 gopAga1_00018730-RA	gopAga1_00018731-RA	gopAga1_00019803-RA	gopAga1_00019875-RA	gopAga1_00017179-RA	gopAga1_00017849-RA	gopAga1_00019957-RA	gopAga1_00016977-RA	gopAga1_00018124-RA	gopAga1_00019481-RA
OG0000307 XP_006276275.1	XP_006263011.1	XP_006263012.1	XP_006270617.2	XP_014455575.1	XP_014455574.1	XP_014462450.1 ENSACAP00000000763.2	ENSACAP00000000765.3	ENSACAP00000017359.2 XP_005307147.1	XP_005300913.1	XP_008163614.1 ENSGALP00000020969.3	ENSGALP00000020967.4	ENSGALP00000020965.4	ENSGALP00000036403.1 ENSP00000269489.6	ENSP00000441497.1	ENSP00000441708.2	ENSP00000480275.1	ENSP00000421854.1	ENSP00000485532.1	ENSP00000485426.1	ENSP00000341584.5	ENSP00000283752.5	ENSP00000329498.8	ENSP00000348795.7	ENSP00000399796.1	ENSP00000398645.1	ENSP00000343445.5 ENSPSIP00000019142.1	ENSPSIP00000003621.1	ENSPSIP00000003623.1 gopAga1_00009437-RA	gopAga1_00020110-RA	gopAga1_00019259-RA
OG0000308 XP_014465218.1	XP_014465212.1	XP_014465220.1	XP_006263860.2	XP_006277234.2 ENSACAP00000000047.3	ENSACAP00000016958.2 XP_008163957.1	XP_008172308.1	XP_008172304.1	XP_008172305.1	XP_008172306.1	XP_008163944.1	XP_005308747.1	XP_008172309.1	XP_005308748.1	XP_008163965.1	XP_008163967.1	XP_008163949.1	XP_008172307.1	XP_008163953.1 ENSGALP00000009950.4	ENSGALP00000021593.4 ENSP00000431653.1	ENSP00000261200.4	ENSP00000261201.4	ENSP00000440521.1	ENSP00000303960.4	ENSP00000374467.3 ENSPSIP00000002680.1	ENSPSIP00000002676.1	ENSPSIP00000017292.1	ENSPSIP00000017315.1 gopAga1_00010388-RA	gopAga1_00009298-RA	gopAga1_00009297-RA	gopAga1_00010388-RB
OG0000309 XP_014450725.1	XP_014450727.1	XP_014450726.1	XP_006264121.1	XP_006264123.1	XP_006264122.1	XP_014451084.1	XP_006274367.1	XP_006274368.1 ENSACAP00000013290.2	ENSACAP00000002039.2 XP_008165238.1	XP_005289983.1	XP_008165236.1	XP_008165237.1	XP_008165235.1	XP_005289989.1	XP_005289985.1	XP_005289984.1	XP_005289982.1 ENSGALP00000007835.4	ENSGALP00000024361.4 ENSP00000394390.1	ENSP00000464812.1	ENSP00000463041.1	ENSP00000384367.3	ENSP00000464170.1	ENSP00000408405.2	ENSP00000462470.1	ENSP00000464261.1	ENSP00000314831.7	ENSP00000284006.4	ENSP00000467612.1 ENSPSIP00000002691.1	ENSPSIP00000009859.1 gopAga1_00008546-RA	gopAga1_00006685-RA
OG0000310 XP_014460173.1	XP_014460175.1	XP_006276726.1	XP_006264600.2	XP_006276725.1	XP_006264601.1 ENSACAP00000021153.2	ENSACAP00000017606.2	ENSACAP00000017591.3	ENSACAP00000022284.1 XP_008160985.1	XP_005294165.1	XP_005294164.1 ENSGALP00000006090.4	ENSGALP00000006098.3	ENSGALP00000006089.4	ENSGALP00000005836.4	ENSGALP00000006093.3 ENSP00000441751.2	ENSP00000468221.1	ENSP00000336604.3	ENSP00000246635.3	ENSP00000409282.1	ENSP00000355124.3	ENSP00000167588.3	ENSP00000466625.1	ENSP00000308452.8	ENSP00000377546.1	ENSP00000377544.3	ENSP00000460501.2	ENSP00000254043.3 ENSPSIP00000002692.1	ENSPSIP00000002657.1	ENSPSIP00000002737.1 gopAga1_00009979-RA	gopAga1_00009981-RA	gopAga1_00017484-RA
OG0000311 XP_014463142.1	XP_014452179.1	XP_014452180.1	XP_006266196.1	XP_006267283.1 ENSACAP00000014232.2	ENSACAP00000000716.3	ENSACAP00000016696.3	ENSACAP00000006115.3 XP_005315666.2	XP_008170270.1	XP_005304138.1	XP_008172503.1	XP_005279405.1	XP_005286585.1 ENSGALP00000022712.4	ENSGALP00000015299.4	ENSGALP00000025180.3 ENSP00000376609.2	ENSP00000347655.5	ENSP00000381129.4	ENSP00000433511.1	ENSP00000427581.1	ENSP00000377204.3	ENSP00000348230.5	ENSP00000264764.8	ENSP00000334876.5 ENSPSIP00000017102.1	ENSPSIP00000003534.1	ENSPSIP00000009192.1	ENSPSIP00000015455.1 gopAga1_00002056-RA	gopAga1_00014013-RA	gopAga1_00009085-RA	gopAga1_00004448-RA	gopAga1_00014013-RC	gopAga1_00014013-RB
OG0000312 XP_014456548.1	XP_014456861.1	XP_014456446.1	XP_006268538.1	XP_014456814.1	XP_006268539.1	XP_006268536.1	XP_006268537.1 ENSACAP00000019063.2	ENSACAP00000006663.2 XP_008171489.1	XP_008171779.1	XP_005285779.1	XP_008171490.1 ENSGALP00000019258.1	ENSGALP00000019254.3	ENSGALP00000019259.3 ENSP00000321988.7	ENSP00000457912.1	ENSP00000378972.1	ENSP00000456459.1	ENSP00000378971.1	ENSP00000338742.4	ENSP00000378570.2	ENSP00000378992.1	ENSP00000226444.3	ENSP00000454518.1	ENSP00000456834.1	ENSP00000353600.7	ENSP00000308770.2	ENSP00000343645.5 ENSPSIP00000014159.1	ENSPSIP00000005924.1	ENSPSIP00000010661.1 gopAga1_00016650-RA	gopAga1_00016648-RB	gopAga1_00016648-RA
OG0000313 XP_006268894.1	XP_014465190.1	XP_014465180.1	XP_014465155.1	XP_006268892.1	XP_006268893.1	XP_014465165.1	XP_014465174.1 ENSACAP00000017023.3 XP_005296679.1	XP_005296680.1	XP_008163857.1	XP_005296669.1	XP_005296678.1	XP_005296681.1	XP_005296682.1	XP_008163863.1	XP_008163903.1	XP_008163911.1	XP_008163898.1	XP_008163853.1	XP_008163879.1	XP_008163886.1	XP_008163897.1	XP_005296677.1	XP_008163930.1	XP_008163867.1 ENSGALP00000021547.4 ENSP00000334229.4	ENSP00000388756.1	ENSP00000443204.1	ENSP00000441951.1	ENSP00000379345.2	ENSP00000439392.1 ENSPSIP00000002767.1	ENSPSIP00000002770.1 gopAga1_00006967-RA
OG0000314 XP_014451938.1	XP_014451939.1	XP_006269220.1 ENSACAP00000022658.1 XP_008163956.1	XP_005285484.1	XP_005285485.1	XP_005285479.1	XP_005285483.1	XP_005285478.1	XP_005285474.1	XP_005285472.1	XP_008163958.1	XP_008163955.1	XP_005285473.1 ENSGALP00000017488.3 ENSP00000426697.1	ENSP00000425322.1	ENSP00000478320.1	ENSP00000451996.1	ENSP00000481390.1	ENSP00000445618.2	ENSP00000450641.1	ENSP00000452356.1	ENSP00000474067.1	ENSP00000484016.1	ENSP00000389376.3	ENSP00000451417.1	ENSP00000339110.6	ENSP00000437157.1	ENSP00000451001.1	ENSP00000450642.1	ENSP00000451385.1	ENSP00000376965.6	ENSP00000481998.1 ENSPSIP00000016762.1 gopAga1_00013282-RA
OG0000315 XP_006271053.1	XP_014462691.1	XP_014463349.1	XP_014462690.1	XP_006270499.1 ENSACAP00000011309.3	ENSACAP00000011791.2	ENSACAP00000007420.3 XP_005307478.1	XP_008175510.1 ENSGALP00000001947.4	ENSGALP00000013808.3 ENSP00000319318.5	ENSP00000400359.1	ENSP00000360186.3	ENSP00000404396.2	ENSP00000236698.5	ENSP00000372689.2	ENSP00000484098.1	ENSP00000477973.1	ENSP00000395039.1	ENSP00000393790.1	ENSP00000360187.3	ENSP00000377586.2	ENSP00000360202.1	ENSP00000360199.3	ENSP00000218089.9 ENSPSIP00000012564.1	ENSPSIP00000016269.1	ENSPSIP00000012567.1 gopAga1_00019134-RB	gopAga1_00019134-RA	gopAga1_00019134-RD	gopAga1_00019134-RC	gopAga1_00019134-RE	gopAga1_00014284-RA	gopAga1_00000819-RA
OG0000316 XP_014453298.1	XP_006271669.1	XP_014453297.1	XP_014453296.1 ENSACAP00000003132.2 XP_005280716.1	XP_005280717.1	XP_008170173.1	XP_008170175.1	XP_008170174.1 ENSGALP00000023557.4 ENSP00000385390.1	ENSP00000355298.5	ENSP00000347686.4	ENSP00000316079.6	ENSP00000311138.5	ENSP00000357324.5	ENSP00000352134.5	ENSP00000385791.1	ENSP00000295566.4	ENSP00000357314.2	ENSP00000357323.5	ENSP00000396117.1	ENSP00000481460.1	ENSP00000478593.1	ENSP00000357315.1	ENSP00000483100.1	ENSP00000354322.5	ENSP00000271883.5 ENSPSIP00000008032.1 gopAga1_00004478-RF	gopAga1_00004478-RA	gopAga1_00004478-RC	gopAga1_00004478-RE	gopAga1_00004478-RG	gopAga1_00004478-RB	gopAga1_00004478-RD
OG0000317 XP_006272254.2	XP_006272258.2	XP_014452046.1	XP_014452047.1	XP_014452049.1	XP_014452048.1	XP_014452043.1	XP_014452044.1	XP_014452045.1 ENSACAP00000002773.3 XP_005288413.1	XP_005288415.1	XP_005288414.1	XP_005288416.1	XP_008166221.1	XP_005288410.1	XP_005288411.1	XP_005288412.1	XP_005288417.1	XP_008166223.1	XP_008166220.1 ENSGALP00000033069.3	ENSGALP00000035479.2 ENSP00000412945.2	ENSP00000398661.1	ENSP00000389978.1	ENSP00000419849.1	ENSP00000373224.3	ENSP00000295951.3	ENSP00000391886.1	ENSP00000412829.1	ENSP00000295952.3	ENSP00000419543.1	ENSP00000418218.1 ENSPSIP00000005071.1 gopAga1_00007591-RA	gopAga1_00013959-RA
OG0000318 XP_014466950.1	XP_014455713.1	XP_006272261.1	XP_006272262.1	XP_006272263.1	XP_014452040.1 ENSACAP00000002662.2	ENSACAP00000009994.3 XP_008172294.1	XP_005288421.1	XP_005288419.1	XP_005288420.1	XP_005288418.1	XP_005280171.1	XP_005280172.1 ENSGALP00000035478.2 ENSP00000415599.2	ENSP00000418510.1	ENSP00000295956.4	ENSP00000351339.3	ENSP00000353467.4	ENSP00000358872.4	ENSP00000358863.3	ENSP00000420213.1	ENSP00000358866.3	ENSP00000480593.1	ENSP00000416926.1 ENSPSIP00000004431.1	ENSPSIP00000004436.1 gopAga1_00007590-RC	gopAga1_00007590-RE	gopAga1_00007590-RB	gopAga1_00018448-RB	gopAga1_00018448-RA	gopAga1_00007590-RD	gopAga1_00007590-RF	gopAga1_00007590-RA
OG0000319 XP_006272987.1	XP_014460704.1	XP_014460705.1	XP_014460703.1	XP_014460706.1	XP_014460707.1 ENSACAP00000001513.3 XP_008173332.1	XP_008173330.1	XP_008173331.1	XP_005283453.1	XP_008168668.1	XP_008171768.1	XP_008171769.1	XP_008173329.1 ENSGALP00000004154.4	ENSGALP00000005366.4 ENSP00000356748.1	ENSP00000331736.7	ENSP00000391694.2	ENSP00000263686.5	ENSP00000356749.1	ENSP00000356762.1	ENSP00000356769.2	ENSP00000236147.4	ENSP00000356760.1	ENSP00000399368.2	ENSP00000356750.1	ENSP00000356751.1 ENSPSIP00000020186.1	ENSPSIP00000019805.1 gopAga1_00007072-RA	gopAga1_00007072-RB	gopAga1_00014152-RA	gopAga1_00014153-RB	gopAga1_00014153-RC	gopAga1_00014153-RA
OG0000320 XP_006273223.1 XP_008175616.1 ENSGALP00000028263.4	ENSGALP00000003870.4	ENSGALP00000021090.3	ENSGALP00000011235.4	ENSGALP00000018362.4	ENSGALP00000025045.4	ENSGALP00000025171.4	ENSGALP00000005828.2	ENSGALP00000025341.4	ENSGALP00000041597.1	ENSGALP00000040611.1	ENSGALP00000022680.4	ENSGALP00000040853.1	ENSGALP00000040799.1	ENSGALP00000023452.4	ENSGALP00000003835.4	ENSGALP00000029358.3	ENSGALP00000013811.4	ENSGALP00000021089.4	ENSGALP00000041742.1	ENSGALP00000005205.3	ENSGALP00000010569.3	ENSGALP00000003677.4	ENSGALP00000008026.4	ENSGALP00000040841.1	ENSGALP00000025176.3	ENSGALP00000025172.4	ENSGALP00000000350.4	ENSGALP00000040829.1 ENSP00000333024.3	ENSP00000246282.4	ENSP00000417712.1	ENSP00000480003.1	ENSP00000420521.1 gopAga1_00012207-RA
OG0000321 XP_006277971.1	XP_014465024.1	XP_006273840.1	XP_006277972.1	XP_014455109.1	XP_014455110.1 ENSACAP00000001171.2	ENSACAP00000011062.2	ENSACAP00000020235.1	ENSACAP00000006196.3 XP_008171508.1	XP_008171507.1	XP_005301962.1	XP_005300494.1 ENSGALP00000041239.1	ENSGALP00000002024.4	ENSGALP00000015090.2 ENSP00000448801.2	ENSP00000447317.1	ENSP00000340315.5	ENSP00000473535.1	ENSP00000422086.1	ENSP00000426094.1	ENSP00000376324.3	ENSP00000377033.2	ENSP00000284727.4	ENSP00000387317.1	ENSP00000422950.1	ENSP00000458423.2	ENSP00000348205.5 ENSPSIP00000006380.1	ENSPSIP00000003338.1	ENSPSIP00000005486.1 gopAga1_00005516-RB	gopAga1_00005516-RA	gopAga1_00012404-RA	gopAga1_00009876-RA
OG0000322 XP_014463108.1	XP_014463110.1	XP_014463111.1	XP_014463112.1	XP_014463109.1	XP_006278684.2 ENSACAP00000020292.2	ENSACAP00000012207.3 XP_008172351.1	XP_008172357.1	XP_008172356.1	XP_008172355.1	XP_008172354.1	XP_008172353.1	XP_008172352.1	XP_008172359.1	XP_008172358.1	XP_005296211.1	XP_005296210.1	XP_005296207.1	XP_005296206.1	XP_005296205.1	XP_008178045.1 ENSGALP00000023357.4	ENSGALP00000041069.1	ENSGALP00000041684.1	ENSGALP00000038609.2 ENSP00000438045.1	ENSP00000415481.2	ENSP00000426809.1	ENSP00000443620.1	ENSP00000427346.1	ENSP00000426090.1 ENSPSIP00000014839.1	ENSPSIP00000014813.1 gopAga1_00016141-RA	gopAga1_00016141-RB
OG0000323 XP_014450123.1	XP_014450122.1	XP_014450125.1	XP_014450124.1	XP_014450127.1	XP_014450126.1	XP_006278817.1	XP_006278814.1	XP_006278813.1 ENSACAP00000009518.3 XP_005293930.1	XP_005293920.1	XP_005293919.1	XP_005293921.1	XP_005293927.1	XP_005293928.1	XP_005293922.1	XP_005293923.1	XP_008164546.1	XP_005293931.1	XP_008164547.1	XP_008164545.1	XP_008164548.1	XP_005293926.1 ENSGALP00000040897.1	ENSGALP00000014715.4 ENSP00000358260.3	ENSP00000376679.3	ENSP00000277895.5	ENSP00000358256.5	ENSP00000433629.2	ENSP00000358270.4	ENSP00000376682.4	ENSP00000358257.2 ENSPSIP00000014832.1 gopAga1_00006179-RA	gopAga1_00006179-RB
OG0000324 XP_014452285.1	XP_014452287.1	XP_014452286.1	XP_014452290.1	XP_014452291.1	XP_014452288.1	XP_014452289.1 ENSACAP00000002356.3	ENSACAP00000009832.3 XP_005291243.1	XP_008171418.1 ENSGALP00000006727.4	ENSGALP00000023172.4 ENSP00000435632.1	ENSP00000470387.1	ENSP00000405504.2	ENSP00000302100.3	ENSP00000489411.1	ENSP00000489325.1	ENSP00000431398.1	ENSP00000398630.2	ENSP00000309576.2	ENSP00000385999.3	ENSP00000435460.1	ENSP00000238181.7	ENSP00000355543.4	ENSP00000342139.6	ENSP00000431884.1	ENSP00000437040.1	ENSP00000434860.1	ENSP00000410843.2	ENSP00000408657.2 ENSPSIP00000010475.1	ENSPSIP00000010484.1 gopAga1_00012773-RA	gopAga1_00009795-RA	gopAga1_00009796-RA
OG0000325 XP_014460056.1	XP_014456698.1	XP_014458542.1 ENSACAP00000012802.3	ENSACAP00000005569.3	ENSACAP00000023132.1	ENSACAP00000008077.3 XP_005308687.1	XP_008172250.1	XP_008168020.1	XP_008168022.1	XP_008168024.1	XP_005308690.1	XP_005308689.1	XP_005308686.1	XP_005308685.1	XP_005308688.1	XP_005311129.1	XP_008168032.1 ENSGALP00000017521.4	ENSGALP00000009166.4 ENSP00000339777.4	ENSP00000265022.3	ENSP00000377703.1	ENSP00000451743.1	ENSP00000386066.3	ENSP00000385780.2	ENSP00000384909.1	ENSP00000385031.1	ENSP00000328405.5	ENSP00000450359.1	ENSP00000382260.3 ENSPSIP00000008106.1	ENSPSIP00000008102.1	ENSPSIP00000003175.1	ENSPSIP00000003177.1 gopAga1_00013492-RA
OG0000326 XP_014463475.1 ENSACAP00000011474.3 XP_005279670.1 ENSGALP00000042282.1 ENSP00000414014.1	ENSP00000411724.1	ENSP00000397565.1	ENSP00000393103.1	ENSP00000403623.2	ENSP00000403630.1	ENSP00000414029.2	ENSP00000401342.1	ENSP00000395175.1	ENSP00000390689.1	ENSP00000393005.2	ENSP00000401745.1	ENSP00000394340.1	ENSP00000396604.1	ENSP00000396971.1	ENSP00000409139.1	ENSP00000397914.1	ENSP00000409389.1	ENSP00000364574.5	ENSP00000407630.1	ENSP00000388400.2	ENSP00000393793.1	ENSP00000409269.1	ENSP00000411487.1	ENSP00000372834.4	ENSP00000410872.1	ENSP00000407528.1	ENSP00000372660.4	ENSP00000394879.2	ENSP00000415567.1	ENSP00000393794.1	ENSP00000364578.3 gopAga1_00020049-RA
OG0000327 XP_014464980.1	XP_014464982.1	XP_014464986.1	XP_014464997.1	XP_014464961.1	XP_014464965.1	XP_014464974.1	XP_014465025.1	XP_014465001.1	XP_014464991.1	XP_014464949.1	XP_014464956.1 ENSACAP00000017313.3 XP_008172512.1	XP_005309052.1	XP_008172514.1	XP_008172520.1	XP_008172521.1	XP_008172519.1	XP_008172518.1	XP_008172511.1	XP_008172510.1	XP_008172513.1	XP_008172515.1	XP_008172522.1	XP_008172517.1	XP_008172516.1 ENSGALP00000021407.4 ENSP00000440611.1	ENSP00000439673.1	ENSP00000440371.1	ENSP00000404296.2	ENSP00000400411.2	ENSP00000299275.6 ENSPSIP00000002195.1	ENSPSIP00000002194.1 gopAga1_00005747-RA
OG0000328 ENSP00000350418.4	ENSP00000478096.2	ENSP00000479316.2	ENSP00000352836.3	ENSP00000471516.1	ENSP00000483118.1	ENSP00000342340.5	ENSP00000349494.3	ENSP00000349401.2	ENSP00000482703.1	ENSP00000478939.1	ENSP00000384000.3	ENSP00000342002.4	ENSP00000395733.3	ENSP00000469958.1	ENSP00000484232.1	ENSP00000380310.1	ENSP00000470209.1	ENSP00000461425.1	ENSP00000308578.6	ENSP00000413660.2	ENSP00000410466.2	ENSP00000471593.1	ENSP00000317125.7	ENSP00000479221.1	ENSP00000413411.1	ENSP00000329793.7	ENSP00000351280.3	ENSP00000468720.1	ENSP00000479286.1	ENSP00000472959.1	ENSP00000476534.2	ENSP00000378783.4	ENSP00000483094.1	ENSP00000418719.1	ENSP00000332595.7	ENSP00000350113.2
OG0000329 XP_006272030.1	XP_006276873.1	XP_006259266.1	XP_014466869.1	XP_014452471.1	XP_014453210.1 ENSACAP00000010928.2	ENSACAP00000015916.3	ENSACAP00000007285.3 XP_008167981.1	XP_008172686.1	XP_005295770.2	XP_008166891.1	XP_008167980.1	XP_008173168.1 ENSGALP00000000412.3	ENSGALP00000042330.1	ENSGALP00000015891.4	ENSGALP00000003234.4	ENSGALP00000041808.1 ENSP00000280333.6	ENSP00000485033.1	ENSP00000276440.7	ENSP00000414125.1	ENSP00000428850.1	ENSP00000256935.8	ENSP00000429283.1 ENSPSIP00000007794.1	ENSPSIP00000007068.1	ENSPSIP00000006446.1	ENSPSIP00000009536.1 gopAga1_00006824-RA	gopAga1_00010726-RA	gopAga1_00005838-RA	gopAga1_00001457-RA	gopAga1_00008170-RA
OG0000330 XP_014464472.1	XP_006259692.2	XP_006259694.2	XP_006259693.2	XP_006259695.2 ENSACAP00000020846.1	ENSACAP00000007955.2	ENSACAP00000018039.1 XP_005290961.1	XP_005290962.1	XP_005290963.1	XP_005290960.1	XP_005290970.1	XP_005290968.1	XP_005290966.1	XP_005290965.1	XP_005290964.1 ENSGALP00000014164.4 ENSP00000365307.5	ENSP00000279599.8	ENSP00000365308.3	ENSP00000365310.3	ENSP00000439646.2	ENSP00000440101.1	ENSP00000365340.4	ENSP00000365312.2	ENSP00000352114.4	ENSP00000365309.2	ENSP00000365336.1	ENSP00000408334.1	ENSP00000405801.1	ENSP00000408898.1	ENSP00000365330.1 ENSPSIP00000015833.1	ENSPSIP00000015800.1 gopAga1_00009390-RA
OG0000331 XP_006273791.1	XP_006273792.1	XP_006267730.1	XP_006259978.1 ENSACAP00000015178.1	ENSACAP00000003163.2	ENSACAP00000014047.2 XP_005294195.1	XP_005311119.1	XP_005311120.1	XP_005308090.1	XP_008173453.1 ENSGALP00000003712.4	ENSGALP00000042461.1 ENSP00000402074.1	ENSP00000407234.1	ENSP00000376161.3	ENSP00000326869.3	ENSP00000464693.1	ENSP00000377724.1	ENSP00000462961.1	ENSP00000376160.4	ENSP00000386253.1	ENSP00000464455.1	ENSP00000448788.1	ENSP00000447834.1	ENSP00000464298.1	ENSP00000304858.2	ENSP00000243045.5 ENSPSIP00000003127.1	ENSPSIP00000016253.1	ENSPSIP00000011414.1 gopAga1_00017399-RA	gopAga1_00004248-RA	gopAga1_00015724-RA	gopAga1_00015724-RB
OG0000332 XP_014466148.1	XP_014466154.1	XP_006260869.1 ENSACAP00000011323.3 XP_005294115.1	XP_005294114.1	XP_005294116.1	XP_008173909.1 ENSP00000298687.5	ENSP00000451712.1	ENSP00000353649.3	ENSP00000380951.3	ENSP00000298684.5	ENSP00000380945.2	ENSP00000380949.2	ENSP00000452006.1	ENSP00000385889.3	ENSP00000380943.2	ENSP00000451105.1	ENSP00000452482.1	ENSP00000489341.1	ENSP00000452306.1	ENSP00000452117.1	ENSP00000451966.1	ENSP00000452038.1	ENSP00000452413.1	ENSP00000452362.1	ENSP00000451274.1	ENSP00000450691.1	ENSP00000452334.1	ENSP00000380954.4	ENSP00000452216.1	ENSP00000380956.1	ENSP00000344620.3 gopAga1_00014250-RB	gopAga1_00014250-RA
OG0000333 XP_014464814.1	XP_006262227.1	XP_014453093.1	XP_014453095.1	XP_014453094.1	XP_014464813.1	XP_006265124.1 ENSACAP00000001433.3	ENSACAP00000001780.2 XP_005281911.1	XP_005281909.1	XP_005309504.1	XP_008164630.1	XP_008164631.1	XP_005309505.1	XP_005281910.1	XP_008170217.1 ENSGALP00000007043.2	ENSGALP00000040832.1 ENSP00000385432.2	ENSP00000425466.1	ENSP00000404997.1	ENSP00000362335.1	ENSP00000362339.1	ENSP00000362338.4	ENSP00000399698.2 ENSPSIP00000005155.1	ENSPSIP00000016001.1 gopAga1_00011373-RA	gopAga1_00011373-RB	gopAga1_00011373-RC	gopAga1_00008864-RB	gopAga1_00008864-RD	gopAga1_00008864-RE	gopAga1_00008864-RC	gopAga1_00008864-RA
OG0000334 XP_006272900.2	XP_014450261.1	XP_006263311.2 ENSACAP00000007055.3	ENSACAP00000001280.2 XP_005298719.1	XP_005284451.1	XP_005284450.1	XP_005284449.1	XP_005284448.1	XP_005284453.1	XP_005284452.1	XP_005284447.1	XP_005298721.1	XP_005298724.1	XP_008164388.1	XP_005298720.1 ENSGALP00000006378.3	ENSGALP00000002465.4 ENSP00000336634.3	ENSP00000376265.2	ENSP00000384591.4	ENSP00000371188.2	ENSP00000388368.2	ENSP00000384600.3	ENSP00000312741.5	ENSP00000441352.1	ENSP00000445944.1	ENSP00000376266.2	ENSP00000321230.3	ENSP00000323118.3	ENSP00000158166.5	ENSP00000388273.2 ENSPSIP00000012035.1	ENSPSIP00000020144.1 gopAga1_00003202-RA
OG0000335 XP_006270843.1	XP_006264344.1	XP_006264343.1	XP_014465999.1	XP_014460227.1	XP_014460228.1	XP_006270842.1	XP_014458596.1	XP_014458597.1	XP_014460226.1 ENSACAP00000006765.3	ENSACAP00000002380.3	ENSACAP00000009133.1 XP_005297138.1	XP_005315252.1 ENSGALP00000036953.1	ENSGALP00000009016.2 ENSP00000377947.2	ENSP00000343698.5	ENSP00000444335.1	ENSP00000388510.2	ENSP00000391391.1	ENSP00000377648.3	ENSP00000373282.4	ENSP00000462514.1	ENSP00000389993.3	ENSP00000377649.2	ENSP00000377643.3	ENSP00000398840.2	ENSP00000254066.5	ENSP00000332296.4 ENSPSIP00000008839.1	ENSPSIP00000002409.1 gopAga1_00015294-RA	gopAga1_00005462-RA	gopAga1_00005627-RA
OG0000336 XP_006264852.2	XP_006266046.1	XP_006266040.1	XP_006266045.1	XP_014457244.1	XP_006266039.1 ENSACAP00000012444.3	ENSACAP00000023267.1	ENSACAP00000011835.2 XP_005281759.1	XP_005297313.1	XP_005297323.2	XP_005293099.1	XP_005293059.1	XP_005293058.1 ENSGALP00000007258.3	ENSGALP00000040782.1	ENSGALP00000022241.4	ENSGALP00000007757.4 ENSP00000365075.3	ENSP00000352639.4	ENSP00000363798.1	ENSP00000338369.6	ENSP00000383135.2	ENSP00000365116.4	ENSP00000290122.3	ENSP00000293636.1 ENSPSIP00000005087.1	ENSPSIP00000006134.1	ENSPSIP00000020465.1	ENSPSIP00000005235.1	ENSPSIP00000005237.1	ENSPSIP00000005269.1	ENSPSIP00000012774.1 gopAga1_00002108-RA	gopAga1_00019578-RA
OG0000337 XP_006278495.1	XP_006278492.1	XP_006278494.1	XP_006278493.1	XP_014450591.1	XP_006264956.2	XP_006264958.2 ENSACAP00000003194.3	ENSACAP00000022234.1	ENSACAP00000006614.3 XP_008171988.1	XP_005287488.1	XP_005290290.1	XP_005290289.1	XP_005290287.1	XP_005290286.1	XP_005290288.1	XP_005290292.1	XP_005290291.1 ENSGALP00000020282.4	ENSGALP00000014328.4 ENSP00000489609.1	ENSP00000342858.4	ENSP00000340391.3	ENSP00000378993.2	ENSP00000217289.4	ENSP00000451084.1	ENSP00000382243.3	ENSP00000441063.1	ENSP00000450741.1 ENSPSIP00000015971.1	ENSPSIP00000005811.1	ENSPSIP00000015966.1 gopAga1_00006984-RA	gopAga1_00012137-RA	gopAga1_00012137-RB
OG0000338 XP_006277700.1	XP_006265330.1	XP_006270303.1	XP_014454377.1 ENSACAP00000015758.3	ENSACAP00000016043.3	ENSACAP00000016487.3	ENSACAP00000012816.3 XP_005312664.1	XP_005302514.1	XP_005283092.1	XP_008162865.1 ENSGALP00000011471.4	ENSGALP00000011564.4	ENSGALP00000020330.2 ENSP00000248901.6	ENSP00000354398.4	ENSP00000486578.1	ENSP00000408236.2	ENSP00000465665.1	ENSP00000297044.7	ENSP00000466512.1	ENSP00000379967.3	ENSP00000465940.1	ENSP00000467052.1	ENSP00000389095.3 ENSPSIP00000014411.1	ENSPSIP00000008265.1 gopAga1_00014680-RA	gopAga1_00011837-RD	gopAga1_00011837-RC	gopAga1_00011837-RF	gopAga1_00011837-RB	gopAga1_00017213-RA	gopAga1_00017213-RB	gopAga1_00011837-RE
OG0000339 XP_014459915.1	XP_006265469.2	XP_014466449.1	XP_014449964.1	XP_014459916.1 ENSACAP00000009220.2	ENSACAP00000022487.1	ENSACAP00000023466.1	ENSACAP00000009163.3	ENSACAP00000007411.1	ENSACAP00000009141.1	ENSACAP00000009151.3	ENSACAP00000009100.1	ENSACAP00000021727.1 XP_008173490.1	XP_005315256.1	XP_008173503.1 ENSGALP00000042647.1 ENSP00000450698.1	ENSP00000451753.1	ENSP00000451406.1	ENSP00000452273.1	ENSP00000381206.3	ENSP00000318631.1	ENSP00000452103.1	ENSP00000451497.1	ENSP00000293502.1 ENSPSIP00000006325.1	ENSPSIP00000016730.1	ENSPSIP00000003516.1	ENSPSIP00000000208.1	ENSPSIP00000003518.1 gopAga1_00010600-RA	gopAga1_00001191-RA	gopAga1_00001190-RA	gopAga1_00001192-RA
OG0000340 XP_006267252.2 XP_005297406.1	XP_005297408.1 ENSGALP00000035047.2	ENSGALP00000034860.2	ENSGALP00000036726.2	ENSGALP00000036724.2	ENSGALP00000040294.2	ENSGALP00000034934.2	ENSGALP00000035032.2	ENSGALP00000042637.1	ENSGALP00000034832.2	ENSGALP00000019917.4	ENSGALP00000041863.1	ENSGALP00000034900.2	ENSGALP00000035048.2	ENSGALP00000035341.2	ENSGALP00000042718.1	ENSGALP00000041538.1	ENSGALP00000034754.2	ENSGALP00000035258.2	ENSGALP00000040290.2	ENSGALP00000035008.2	ENSGALP00000035031.2	ENSGALP00000034905.2	ENSGALP00000034873.2	ENSGALP00000034767.2	ENSGALP00000034870.2	ENSGALP00000041047.1	ENSGALP00000026950.4 ENSP00000318690.3	ENSP00000386552.3	ENSP00000409340.1 ENSPSIP00000012086.1	ENSPSIP00000012142.1 gopAga1_00014002-RA
OG0000341 XP_014454695.1	XP_014466101.1	XP_006275559.1	XP_006276396.1	XP_006272154.1 ENSACAP00000011044.3	ENSACAP00000011945.3	ENSACAP00000006477.2	ENSACAP00000018101.1 XP_005283259.1	XP_005285756.1	XP_008161680.1	XP_005283261.1	XP_005282272.1 ENSGALP00000026992.1	ENSGALP00000035597.2	ENSGALP00000022830.1	ENSGALP00000041391.1	ENSGALP00000011783.4 ENSP00000386761.1	ENSP00000389881.2	ENSP00000426862.1	ENSP00000384264.3	ENSP00000443401.2	ENSP00000369268.2	ENSP00000328478.4	ENSP00000410070.2	ENSP00000351320.4	ENSP00000377140.1	ENSP00000272602.2 ENSPSIP00000018529.1	ENSPSIP00000012471.1	ENSPSIP00000015307.1 gopAga1_00013431-RA	gopAga1_00002436-RA	gopAga1_00017128-RA
OG0000342 XP_014466199.1	XP_014466197.1	XP_014466198.1	XP_014466201.1	XP_014466200.1	XP_006272414.1 ENSACAP00000005431.2	ENSACAP00000000945.3 XP_005289211.1	XP_008162887.1	XP_008162888.1	XP_008162889.1	XP_008162893.1	XP_008162892.1	XP_008162891.1	XP_008162890.1	XP_008162897.1	XP_008162896.1	XP_008162895.1	XP_008162894.1	XP_008162886.1 ENSGALP00000005991.4 ENSP00000384116.1	ENSP00000384015.1	ENSP00000409909.1	ENSP00000406653.1	ENSP00000392309.2	ENSP00000413439.2	ENSP00000406444.1	ENSP00000374225.3 ENSPSIP00000004873.1 gopAga1_00002455-RB	gopAga1_00002455-RA	gopAga1_00002455-RE	gopAga1_00002455-RD	gopAga1_00002455-RC
OG0000343 XP_006273437.1 ENSACAP00000011295.3 XP_005312388.1 ENSP00000365981.2	ENSP00000393236.2	ENSP00000405264.1	ENSP00000410127.2	ENSP00000416599.1	ENSP00000396922.1	ENSP00000394779.2	ENSP00000331111.5	ENSP00000352333.4	ENSP00000365978.2	ENSP00000391809.2	ENSP00000405636.1	ENSP00000396661.1	ENSP00000399302.2	ENSP00000410530.1	ENSP00000414720.2	ENSP00000397636.2	ENSP00000407364.1	ENSP00000399966.2	ENSP00000402198.2	ENSP00000414110.1	ENSP00000387914.1	ENSP00000412369.1	ENSP00000395397.2	ENSP00000383503.3	ENSP00000383500.1	ENSP00000373108.2	ENSP00000383501.3	ENSP00000395065.1	ENSP00000410954.1	ENSP00000413265.2	ENSP00000407715.2 ENSPSIP00000002353.1
OG0000344 XP_014455862.1	XP_006274425.2 ENSACAP00000004958.3	ENSACAP00000022631.1	ENSACAP00000016492.2 XP_008162337.1	XP_008177199.1	XP_008162339.1	XP_005303965.1	XP_008162341.1	XP_008162340.1	XP_008162342.1	XP_008177201.1	XP_008177200.1	XP_008162338.1	XP_005303963.1	XP_005303961.1	XP_005303962.1	XP_005303959.1	XP_005303960.1	XP_005303954.1	XP_005303957.1	XP_008162334.1	XP_008162335.1	XP_008162336.1 ENSGALP00000009669.4	ENSGALP00000027222.4 ENSP00000276202.7	ENSP00000276204.6	ENSP00000487829.1	ENSP00000401958.3	ENSP00000365643.1 ENSPSIP00000008388.1	ENSPSIP00000003029.1 gopAga1_00009249-RA	gopAga1_00009249-RB
OG0000345 XP_014460650.1	XP_014460651.1	XP_014460652.1	XP_014460653.1	XP_014460648.1	XP_014460649.1	XP_014460656.1	XP_014460657.1	XP_006274761.2	XP_014460659.1	XP_014460660.1	XP_014460655.1	XP_014460658.1	XP_014460661.1 ENSACAP00000021898.1 XP_008161078.1	XP_008161079.1	XP_008161076.1	XP_008161077.1	XP_008161074.1	XP_008161075.1	XP_008161072.1	XP_008161073.1	XP_008161080.1	XP_008161081.1	XP_008161082.1	XP_008161083.1 ENSGALP00000005199.4 ENSP00000375928.4	ENSP00000343629.4	ENSP00000356716.3	ENSP00000410219.3	ENSP00000420382.1 ENSPSIP00000011764.1 gopAga1_00011882-RA	gopAga1_00011883-RA
OG0000346 XP_006275152.1 ENSACAP00000009647.3 XP_008173787.1	XP_008173669.1	XP_005304855.1	XP_005304852.1	XP_005304851.1	XP_008174046.1	XP_008173820.1	XP_008173399.1	XP_008173375.1	XP_008173634.1	XP_008173610.1	XP_008173515.1	XP_008173464.1	XP_008174079.1	XP_008173431.1	XP_008173586.1	XP_008174026.1	XP_008173879.1	XP_008173352.1	XP_008173760.1	XP_008173989.1	XP_005304844.1	XP_008173565.1 ENSGALP00000024300.4 ENSP00000419153.1	ENSP00000419902.1	ENSP00000420324.1	ENSP00000349803.3	ENSP00000377375.2	ENSP00000418092.1	ENSP00000417307.1	ENSP00000420684.1 ENSPSIP00000002585.1 gopAga1_00002085-RA
OG0000347 XP_014453956.1	XP_014453954.1	XP_014453955.1	XP_014453953.1	XP_006276944.1 ENSACAP00000015391.3	ENSACAP00000009921.3 XP_008161736.1	XP_008161737.1	XP_008174931.1	XP_008161738.1	XP_008161739.1	XP_008161749.1	XP_008161748.1	XP_008161743.1	XP_008161751.1	XP_008161741.1	XP_008161740.1	XP_008161747.1	XP_008161746.1	XP_005298750.2	XP_008161750.1	XP_005298748.1	XP_008161742.1 ENSGALP00000021509.4	ENSGALP00000005769.4 ENSP00000398787.2	ENSP00000280562.5	ENSP00000474962.1	ENSP00000437611.1	ENSP00000322218.4	ENSP00000437286.1	ENSP00000348772.3 gopAga1_00003113-RA	gopAga1_00014572-RB	gopAga1_00014572-RA
OG0000348 XP_014459181.1	XP_014459178.1	XP_014459179.1	XP_006277295.2 ENSACAP00000014169.2	ENSACAP00000020196.1 XP_008170978.1	XP_008170979.1	XP_008170972.1	XP_008170973.1	XP_008170974.1	XP_008170975.1	XP_008170976.1	XP_008170977.1 ENSGALP00000043213.1	ENSGALP00000001909.4 ENSP00000478624.1	ENSP00000481541.1	ENSP00000480172.1	ENSP00000377298.3	ENSP00000351851.6	ENSP00000439759.1	ENSP00000438821.1	ENSP00000438589.1	ENSP00000439092.1	ENSP00000444175.1	ENSP00000439576.1	ENSP00000357955.5	ENSP00000442761.1	ENSP00000442936.1	ENSP00000444880.1	ENSP00000446396.1	ENSP00000260051.8	ENSP00000440954.1 ENSPSIP00000002410.1 gopAga1_00015462-RA
OG0000349 XP_014449099.1	XP_014449098.1	XP_014449102.1	XP_014449100.1	XP_014449101.1	XP_014449097.1	XP_014464376.1 ENSACAP00000009061.3 XP_005284519.1	XP_008164431.1	XP_008164427.1	XP_008164428.1	XP_008164429.1	XP_008164430.1	XP_005307734.1	XP_005307733.1	XP_005307732.1	XP_005307731.1	XP_005307730.1 ENSGALP00000013190.4	ENSGALP00000003342.3 ENSP00000387612.1	ENSP00000350199.2	ENSP00000386071.1	ENSP00000319361.7	ENSP00000384194.1	ENSP00000484708.1	ENSP00000482315.1	ENSP00000483185.1	ENSP00000482835.1	ENSP00000400065.2 ENSPSIP00000018579.1	ENSPSIP00000008605.1	ENSPSIP00000008637.1 gopAga1_00006338-RA	gopAga1_00016967-RA
OG0000350 XP_014452988.1 ENSACAP00000005886.3 XP_005314270.1	XP_005292532.1 ENSGALP00000004346.4	ENSGALP00000004315.4 ENSP00000410304.2	ENSP00000394465.1	ENSP00000378820.2	ENSP00000484703.1	ENSP00000478512.1	ENSP00000322604.6	ENSP00000363066.1	ENSP00000481211.1	ENSP00000363067.4	ENSP00000378821.1	ENSP00000386693.1	ENSP00000378833.1	ENSP00000478076.1	ENSP00000378827.1	ENSP00000378829.1	ENSP00000484454.1	ENSP00000483745.1	ENSP00000363076.3	ENSP00000412320.1	ENSP00000363068.4	ENSP00000482921.1	ENSP00000378826.2	ENSP00000378818.1	ENSP00000354950.3	ENSP00000378832.2	ENSP00000482794.1	ENSP00000412531.1 ENSPSIP00000009388.1	ENSPSIP00000017457.1 gopAga1_00003056-RA
OG0000351 XP_014454937.1	XP_014454936.1	XP_014454930.1	XP_014454946.1	XP_014454947.1	XP_014454929.1	XP_014454928.1	XP_014454931.1	XP_014454945.1	XP_014454938.1	XP_014454939.1	XP_014454940.1	XP_014454934.1	XP_014454935.1	XP_014454941.1	XP_014454925.1	XP_014454948.1	XP_014454924.1	XP_014454942.1	XP_014454922.1	XP_014454923.1	XP_014454920.1	XP_014454921.1	XP_014454943.1	XP_014454944.1	XP_014454926.1	XP_014454927.1 ENSACAP00000003825.2 XP_008169671.1 ENSGALP00000020390.4	ENSGALP00000020383.4 ENSP00000410961.1	ENSP00000386259.1	ENSP00000172853.10 ENSPSIP00000014644.1 gopAga1_00003454-RA
OG0000352 XP_014461620.1	XP_014455265.1	XP_014462947.1 ENSACAP00000019848.1	ENSACAP00000015349.2	ENSACAP00000004391.2	ENSACAP00000006928.2 XP_008169535.1	XP_008169536.1	XP_008173121.1	XP_005288920.1	XP_008169534.1	XP_008169537.1	XP_005288919.1	XP_005305134.1	XP_005305135.1 ENSGALP00000003389.4	ENSGALP00000007197.4	ENSGALP00000038594.2 ENSP00000479261.1	ENSP00000380006.1	ENSP00000367756.3	ENSP00000446831.1	ENSP00000447572.1	ENSP00000252773.8	ENSP00000367757.5	ENSP00000447236.1	ENSP00000429562.2	ENSP00000260323.11	ENSP00000484432.1 ENSPSIP00000011889.1	ENSPSIP00000018726.1	ENSPSIP00000018716.1	ENSPSIP00000016122.1 gopAga1_00014786-RA	gopAga1_00014787-RA
OG0000353 XP_014457614.1	XP_014464776.1 ENSACAP00000012363.3	ENSACAP00000004805.3 XP_008177143.1	XP_008177145.1	XP_008162460.1	XP_008162462.1	XP_008162464.1	XP_008177138.1	XP_008162466.1	XP_008162463.1	XP_008177140.1	XP_008177141.1	XP_008177142.1	XP_008177144.1	XP_008177146.1	XP_008162465.1 ENSGALP00000008874.4	ENSGALP00000021257.4 ENSP00000433965.1	ENSP00000368932.3	ENSP00000344894.5	ENSP00000441689.2	ENSP00000391827.2	ENSP00000383406.2	ENSP00000462033.1	ENSP00000372574.3	ENSP00000256194.4	ENSP00000416015.2 ENSPSIP00000011477.1	ENSPSIP00000015320.1	ENSPSIP00000011523.1	ENSPSIP00000015338.1 gopAga1_00002797-RA	gopAga1_00000964-RA
OG0000354 XP_014459262.1	XP_014459261.1	XP_014458407.1	XP_014458408.1	XP_014458409.1	XP_014459259.1	XP_014458412.1	XP_014458410.1	XP_014458411.1 ENSACAP00000014271.2 XP_008162514.1	XP_005279452.1	XP_005279453.1	XP_008162517.1	XP_008162512.1	XP_008162513.1	XP_005304415.1	XP_008162515.1	XP_008162516.1 ENSGALP00000001685.3	ENSGALP00000003467.3	ENSGALP00000039459.2 ENSP00000441469.1	ENSP00000442636.1	ENSP00000439651.1	ENSP00000356355.4	ENSP00000444621.1	ENSP00000405215.1	ENSP00000441426.1	ENSP00000377749.2	ENSP00000362705.1	ENSP00000362702.3	ENSP00000319734.5 ENSPSIP00000012984.1	ENSPSIP00000005355.1 gopAga1_00011659-RA
OG0000355 XP_014462749.1	XP_014462935.1	XP_014462794.1	XP_014462934.1	XP_014462746.1	XP_014462747.1	XP_014462744.1	XP_014462745.1 ENSACAP00000009128.2 XP_008164736.1	XP_008170985.1	XP_005313966.1 ENSGALP00000006752.4 ENSP00000460607.1	ENSP00000403701.3	ENSP00000433171.1	ENSP00000370898.6	ENSP00000269260.2	ENSP00000341895.2	ENSP00000465296.1	ENSP00000466344.1	ENSP00000353124.3	ENSP00000409581.2	ENSP00000363619.3	ENSP00000311538.8	ENSP00000480426.1 ENSPSIP00000016775.1	ENSPSIP00000016764.1	ENSPSIP00000020590.1	ENSPSIP00000020592.1	ENSPSIP00000011526.1 gopAga1_00015298-RC	gopAga1_00015298-RA	gopAga1_00015298-RB	gopAga1_00015298-RD	gopAga1_00000852-RA
OG0000356 XP_014463752.1 ENSACAP00000018000.2 XP_008175097.1 ENSP00000416390.1	ENSP00000438200.2	ENSP00000447179.1	ENSP00000449456.2	ENSP00000407946.1	ENSP00000415752.1	ENSP00000407805.2	ENSP00000415729.1	ENSP00000408591.1	ENSP00000449382.1	ENSP00000447478.2	ENSP00000415560.1	ENSP00000372860.3	ENSP00000316092.5	ENSP00000396754.2	ENSP00000446839.1	ENSP00000448002.2	ENSP00000400867.2	ENSP00000446608.2	ENSP00000449862.1	ENSP00000406721.1	ENSP00000395255.1	ENSP00000447763.2	ENSP00000414807.1	ENSP00000447141.1	ENSP00000403749.1	ENSP00000441000.1	ENSP00000485818.1	ENSP00000373032.3	ENSP00000401775.1	ENSP00000394190.1 ENSPSIP00000006705.1 gopAga1_00012514-RA
OG0000357 XP_014464294.1	XP_014465230.1 ENSACAP00000021094.2	ENSACAP00000011220.3 XP_008170412.1	XP_008170414.1	XP_008170413.1	XP_005315346.1	XP_005291785.1	XP_008176457.1	XP_008170429.1	XP_005315309.1 ENSGALP00000038628.2	ENSGALP00000038630.2	ENSGALP00000009957.4	ENSGALP00000038632.2 ENSP00000216927.4	ENSP00000305529.3	ENSP00000279477.7	ENSP00000456826.1	ENSP00000456747.1	ENSP00000455568.1	ENSP00000457458.1	ENSP00000457855.1	ENSP00000456519.1	ENSP00000370992.1	ENSP00000478763.1	ENSP00000348307.3	ENSP00000351621.4	ENSP00000382941.4	ENSP00000370995.2	ENSP00000457829.1	ENSP00000371018.4 ENSPSIP00000012777.1	ENSPSIP00000013044.1	ENSPSIP00000012556.1
OG0000358 XP_014465102.1	XP_014465099.1	XP_014465101.1	XP_014465800.1 ENSACAP00000004766.3	ENSACAP00000015710.3 XP_005284253.1	XP_005284254.1	XP_008170712.1	XP_005313062.1 ENSGALP00000032883.2 ENSP00000379250.1	ENSP00000379247.1	ENSP00000313950.6	ENSP00000360407.2	ENSP00000321591.6	ENSP00000379251.3	ENSP00000216911.2	ENSP00000379249.3	ENSP00000379243.1	ENSP00000406798.2	ENSP00000407162.1	ENSP00000302898.6	ENSP00000471830.1	ENSP00000469983.1	ENSP00000443869.1	ENSP00000463999.1	ENSP00000462858.1	ENSP00000462207.1	ENSP00000463636.1 ENSPSIP00000016435.1	ENSPSIP00000007182.1	ENSPSIP00000007191.1 gopAga1_00017315-RA	gopAga1_00017315-RB	gopAga1_00019699-RA
OG0000359 XP_014466676.1	XP_014466677.1	XP_014466678.1	XP_014466679.1	XP_014466675.1 ENSACAP00000007103.3 XP_008165314.1	XP_008165318.1	XP_008172566.1	XP_005303417.1	XP_008171019.1	XP_005303419.1	XP_005303418.1 ENSGALP00000026200.4 ENSP00000367997.3	ENSP00000350765.2	ENSP00000367979.3	ENSP00000354923.3	ENSP00000340057.3	ENSP00000367951.2	ENSP00000354464.4	ENSP00000367977.3	ENSP00000288447.4	ENSP00000356494.3	ENSP00000478150.1	ENSP00000352894.1	ENSP00000479270.1	ENSP00000367948.2	ENSP00000444119.1	ENSP00000367974.4	ENSP00000417123.1 ENSPSIP00000006271.1	ENSPSIP00000006265.1	ENSPSIP00000020162.1 gopAga1_00001208-RA	gopAga1_00002374-RA
OG0000360 ENSACAP00000014795.2	ENSACAP00000019477.1	ENSACAP00000020356.1	ENSACAP00000018093.1	ENSACAP00000020464.1	ENSACAP00000019040.1	ENSACAP00000019079.1	ENSACAP00000019450.1	ENSACAP00000020821.1	ENSACAP00000019775.1	ENSACAP00000020337.1	ENSACAP00000020486.1	ENSACAP00000016720.2	ENSACAP00000021346.1	ENSACAP00000018136.1	ENSACAP00000020971.1	ENSACAP00000019324.1	ENSACAP00000020068.1	ENSACAP00000018414.1	ENSACAP00000018289.1	ENSACAP00000020681.1	ENSACAP00000019596.1	ENSACAP00000020499.1	ENSACAP00000021350.1	ENSACAP00000018087.1	ENSACAP00000019350.1	ENSACAP00000019001.1	ENSACAP00000020074.1	ENSACAP00000021177.1	ENSACAP00000017996.1	ENSACAP00000019454.1	ENSACAP00000018972.1	ENSACAP00000018081.1	ENSACAP00000019707.1 ENSPSIP00000000905.1	ENSPSIP00000001780.1
OG0000361 XP_006258152.1	XP_006258153.1	XP_006258151.1 ENSACAP00000021981.1 XP_008165274.1	XP_008165275.1	XP_008165276.1	XP_008165272.1	XP_008165271.1	XP_008165273.1 ENSP00000401662.1	ENSP00000384641.1	ENSP00000481030.1	ENSP00000411870.1	ENSP00000309226.8	ENSP00000376943.2	ENSP00000376941.3	ENSP00000411137.1	ENSP00000393781.1	ENSP00000338374.5	ENSP00000412892.1	ENSP00000403727.1	ENSP00000354879.6	ENSP00000391292.1	ENSP00000394640.1	ENSP00000389225.1	ENSP00000484360.1	ENSP00000350398.3	ENSP00000481423.1	ENSP00000481652.1	ENSP00000479714.1	ENSP00000478133.1	ENSP00000482175.1 ENSPSIP00000017197.1 gopAga1_00016173-RA
OG0000362 XP_006258414.1	XP_014458779.1	XP_014458780.1	XP_014458778.1	XP_014464428.1 ENSACAP00000002742.3	ENSACAP00000016921.3 XP_005308145.1	XP_005308144.1	XP_008161179.1	XP_005308147.1	XP_005308146.1	XP_005308153.1	XP_005308150.1	XP_005308149.1	XP_005311196.1	XP_005308143.1	XP_005308142.1	XP_005308435.1	XP_008173563.1	XP_005308152.1 ENSGALP00000009895.4	ENSGALP00000010746.4 ENSP00000370907.4	ENSP00000489203.1	ENSP00000392066.2	ENSP00000280886.6	ENSP00000301180.5 ENSPSIP00000006552.1	ENSPSIP00000018569.1	ENSPSIP00000006540.1	ENSPSIP00000010897.1 gopAga1_00001921-RA	gopAga1_00008020-RA	gopAga1_00008020-RB
OG0000363 XP_014462256.1	XP_014462257.1	XP_014462254.1	XP_014462255.1	XP_006275506.1	XP_014462259.1	XP_014462258.1	XP_006259952.2 ENSACAP00000013350.3	ENSACAP00000014183.3	ENSACAP00000005087.3 XP_008174170.1	XP_008170925.1	XP_005306574.1	XP_008176976.1 ENSGALP00000000973.4	ENSGALP00000018656.4 ENSP00000423408.1	ENSP00000429751.1	ENSP00000423665.1	ENSP00000442926.1	ENSP00000444459.2	ENSP00000482886.1	ENSP00000349762.4	ENSP00000276052.6	ENSP00000399082.2	ENSP00000261211.3	ENSP00000353176.2	ENSP00000405798.2	ENSP00000429985.1 ENSPSIP00000010689.1	ENSPSIP00000015179.1 gopAga1_00018936-RA	gopAga1_00001997-RA	gopAga1_00001997-RB
OG0000364 XP_006267323.1	XP_006267325.1	XP_006262457.1 ENSACAP00000012832.1	ENSACAP00000023485.1 XP_008164759.1	XP_005304259.1	XP_008170531.1	XP_008170533.1	XP_008170532.1	XP_008170534.1	XP_005304260.1	XP_005279494.1	XP_005279496.1	XP_005304257.1	XP_005279497.1	XP_005279498.1	XP_005304258.1 ENSGALP00000006783.3	ENSGALP00000001328.3 ENSP00000317149.4	ENSP00000259351.5	ENSP00000377590.3	ENSP00000404021.1	ENSP00000415630.2	ENSP00000362535.1	ENSP00000362533.1	ENSP00000356607.3	ENSP00000313613.5	ENSP00000356606.2	ENSP00000356604.2 ENSPSIP00000012933.1	ENSPSIP00000012930.1 gopAga1_00003602-RA	gopAga1_00002133-RA
OG0000365 XP_006262563.1	XP_006262559.1	XP_006262560.1	XP_006262561.1	XP_006262562.1	XP_014463021.1	XP_014463022.1	XP_014463024.1	XP_014463025.1	XP_014463023.1 ENSACAP00000007603.3	ENSACAP00000019568.1 XP_008170479.1	XP_008170477.1	XP_008170475.1	XP_008170478.1	XP_008170476.1 ENSGALP00000010844.4	ENSGALP00000010845.4 ENSP00000488690.1	ENSP00000443926.1	ENSP00000488422.1	ENSP00000487802.1	ENSP00000382743.3	ENSP00000404834.3	ENSP00000476999.1	ENSP00000476656.1	ENSP00000346971.3	ENSP00000406451.2	ENSP00000488268.1	ENSP00000488582.1 ENSPSIP00000007733.1	ENSPSIP00000015632.1 gopAga1_00006923-RB	gopAga1_00006923-RA
OG0000366 XP_006267567.1	XP_014461389.1	XP_014461390.1	XP_006262726.1 ENSACAP00000011478.3	ENSACAP00000001885.3 XP_005287598.1	XP_005287602.1	XP_005287601.1	XP_005287603.1	XP_005287599.1	XP_005287600.1	XP_008169081.1	XP_005291889.1 ENSGALP00000022754.4	ENSGALP00000013538.4 ENSP00000489095.1	ENSP00000488994.1	ENSP00000352065.6	ENSP00000431701.1	ENSP00000432996.1	ENSP00000374608.3	ENSP00000435855.1	ENSP00000318803.4	ENSP00000436164.1	ENSP00000437005.1	ENSP00000432144.1	ENSP00000434010.1	ENSP00000374610.4	ENSP00000435238.1 ENSPSIP00000007292.1	ENSPSIP00000010365.1 gopAga1_00008584-RB	gopAga1_00008584-RA	gopAga1_00014468-RA
OG0000367 XP_006262958.1	XP_006262959.1	XP_014456281.1 ENSACAP00000009828.3	ENSACAP00000019515.1 XP_005314484.1	XP_005279694.2 ENSP00000408447.1	ENSP00000382516.1	ENSP00000372721.4	ENSP00000396311.1	ENSP00000372595.4	ENSP00000378739.1	ENSP00000404847.1	ENSP00000401624.1	ENSP00000396813.2	ENSP00000411561.1	ENSP00000401221.1	ENSP00000363993.2	ENSP00000394363.1	ENSP00000406858.1	ENSP00000398642.1	ENSP00000412027.2	ENSP00000406077.1	ENSP00000406380.1	ENSP00000407810.2	ENSP00000382305.1	ENSP00000401229.1	ENSP00000270586.3	ENSP00000393744.2	ENSP00000409850.1	ENSP00000485006.1	ENSP00000407233.2 ENSPSIP00000003535.1 gopAga1_00018735-RA
OG0000368 XP_014467126.1	XP_014467127.1	XP_006263472.1	XP_006263471.1	XP_014452806.1 ENSACAP00000008552.3	ENSACAP00000011568.2	ENSACAP00000001237.2 XP_005287793.1	XP_008171014.1	XP_005306681.1	XP_005295351.1	XP_005295352.1 ENSGALP00000006578.2	ENSGALP00000043305.1	ENSGALP00000036122.2	ENSGALP00000028746.2 ENSP00000300161.4	ENSP00000371267.4	ENSP00000238081.3	ENSP00000430058.1	ENSP00000379288.2	ENSP00000398599.1	ENSP00000379281.3	ENSP00000395114.2	ENSP00000379283.2	ENSP00000379286.3	ENSP00000309503.3	ENSP00000361930.3	ENSP00000379287.2 ENSPSIP00000014203.1	ENSPSIP00000003913.1	ENSPSIP00000014207.1	ENSPSIP00000014831.1 gopAga1_00015702-RA
OG0000369 XP_014461757.1	XP_014461759.1	XP_014461758.1	XP_006269015.1	XP_006265654.1	XP_014449337.1	XP_014449336.1	XP_006269016.1	XP_006265652.1	XP_006269017.1 ENSACAP00000011008.3	ENSACAP00000015583.3 XP_008169510.1	XP_008169511.1	XP_005302472.1	XP_008173659.1	XP_005302473.1	XP_005302469.1	XP_005302470.1	XP_005279648.1	XP_005279643.1	XP_005279644.1	XP_008173658.1 ENSGALP00000018540.3 ENSP00000359896.3	ENSP00000336888.4	ENSP00000359892.5	ENSP00000466664.1 ENSPSIP00000009518.1	ENSPSIP00000007641.1	ENSPSIP00000007624.1 gopAga1_00013280-RA	gopAga1_00018873-RC	gopAga1_00018873-RB	gopAga1_00018873-RA
OG0000370 XP_006267661.1	XP_014463710.1	XP_014465391.1	XP_014465393.1	XP_014465392.1	XP_014463712.1	XP_014463711.1 ENSACAP00000014495.2	ENSACAP00000011677.3 XP_008173305.1	XP_008173304.1	XP_008168443.1	XP_005279228.1	XP_008168442.1	XP_005279230.1	XP_008168449.1	XP_008168448.1	XP_005281622.1	XP_005279229.1	XP_008168441.1	XP_008168444.1	XP_008168447.1	XP_008168446.1	XP_008168445.1	XP_005281621.1 ENSGALP00000026603.4	ENSGALP00000007651.3 ENSP00000441251.1	ENSP00000369274.4	ENSP00000362640.3	ENSP00000342469.3	ENSP00000362643.4	ENSP00000362646.3 ENSPSIP00000018536.1 gopAga1_00006477-RA
OG0000371 XP_014466444.1	XP_014466442.1	XP_014466441.1	XP_014466443.1	XP_006268558.2	XP_006271883.1	XP_014451982.1	XP_014451981.1 ENSACAP00000004354.3	ENSACAP00000009950.2 XP_005311523.1	XP_005311521.1	XP_005311520.1	XP_005285448.1	XP_005285447.1	XP_005285446.1 ENSGALP00000016255.4	ENSGALP00000017354.4 ENSP00000451440.1	ENSP00000451825.1	ENSP00000336127.4	ENSP00000451928.1	ENSP00000452031.1	ENSP00000451201.1	ENSP00000451238.1	ENSP00000386521.1	ENSP00000401467.1	ENSP00000386307.1	ENSP00000378320.2	ENSP00000316699.5	ENSP00000393022.1 ENSPSIP00000006338.1	ENSPSIP00000016735.1 gopAga1_00001847-RA	gopAga1_00007891-RA
OG0000372 XP_014458309.1	XP_014458308.1	XP_014458300.1	XP_014458306.1	XP_014458307.1	XP_006268637.1	XP_006268635.1	XP_006268636.1	XP_014458301.1 ENSACAP00000022986.1 XP_008163281.1	XP_008163272.1	XP_008163278.1	XP_008163273.1	XP_008163271.1	XP_005286998.1	XP_008163280.1	XP_008163282.1	XP_008163275.1 ENSGALP00000042639.1	ENSGALP00000016851.4	ENSGALP00000043298.1	ENSGALP00000016852.4 ENSP00000350064.3	ENSP00000419347.1	ENSP00000319429.5	ENSP00000420327.1	ENSP00000418109.1	ENSP00000420103.1	ENSP00000347637.2	ENSP00000282486.6	ENSP00000418108.1	ENSP00000282488.8 ENSPSIP00000008999.1	ENSPSIP00000009006.1
OG0000373 XP_014456707.1	XP_006269078.2	XP_014456708.1 ENSACAP00000011541.3 XP_005314398.1	XP_005314399.1 ENSGALP00000042917.1 ENSP00000364193.2	ENSP00000364200.1	ENSP00000364198.1	ENSP00000336962.4	ENSP00000364209.1	ENSP00000218439.4	ENSP00000379526.1	ENSP00000382870.1	ENSP00000382871.1	ENSP00000382869.1	ENSP00000330694.4	ENSP00000405126.2	ENSP00000483142.1	ENSP00000404794.1	ENSP00000364181.2	ENSP00000487893.1	ENSP00000486563.1	ENSP00000382867.1	ENSP00000382641.1	ENSP00000364162.4	ENSP00000438254.1	ENSP00000318278.8	ENSP00000173898.7	ENSP00000407996.1	ENSP00000315064.3 ENSPSIP00000012818.1	ENSPSIP00000003506.1 gopAga1_00019939-RA
OG0000374 XP_014450900.1	XP_006270037.1 ENSACAP00000010113.3 XP_005288258.1	XP_005288260.1	XP_005288259.1	XP_005288261.1	XP_008165716.1 ENSGALP00000036846.2 ENSP00000482371.1	ENSP00000477996.1	ENSP00000480786.1	ENSP00000481388.1	ENSP00000477962.1	ENSP00000479160.1	ENSP00000427743.1	ENSP00000346938.5	ENSP00000426191.1	ENSP00000478167.1	ENSP00000311227.7	ENSP00000346271.3	ENSP00000282891.6	ENSP00000303134.4	ENSP00000484227.1	ENSP00000483115.1	ENSP00000484854.1	ENSP00000480230.1	ENSP00000482775.1	ENSP00000370151.3	ENSP00000355226.2	ENSP00000350725.2 ENSPSIP00000016926.1	ENSPSIP00000016922.1 gopAga1_00011793-RA	gopAga1_00011793-RB
OG0000375 XP_006273352.1	XP_006270212.1 ENSACAP00000019695.1 XP_008168534.1	XP_005293739.1	XP_005293738.1	XP_005305127.1	XP_005305128.1	XP_005305129.1 ENSGALP00000038292.2	ENSGALP00000042251.1 ENSP00000457631.1	ENSP00000454612.1	ENSP00000457123.1	ENSP00000454341.1	ENSP00000455151.1	ENSP00000455986.1	ENSP00000454297.1	ENSP00000455610.1	ENSP00000424242.1	ENSP00000354835.5	ENSP00000358010.5	ENSP00000355239.5	ENSP00000271690.7	ENSP00000341743.5	ENSP00000422343.1	ENSP00000348921.5	ENSP00000455625.1	ENSP00000249822.4	ENSP00000454234.1	ENSP00000457805.1	ENSP00000358012.4 ENSPSIP00000009984.1 gopAga1_00009426-RA	gopAga1_00014133-RA
OG0000376 XP_006271307.1	XP_006274874.1	XP_006273023.1	XP_014467008.1	XP_014467009.1	XP_006273022.1	XP_014467007.1	XP_014467006.1 ENSACAP00000011575.2	ENSACAP00000000669.2	ENSACAP00000009046.2 XP_008163347.1	XP_005300230.1	XP_005298473.1 ENSGALP00000005159.2	ENSGALP00000025996.3	ENSGALP00000026187.3 ENSP00000481205.1	ENSP00000487595.1	ENSP00000484500.1	ENSP00000487610.1	ENSP00000473259.1	ENSP00000473490.1	ENSP00000344909.6	ENSP00000332274.1	ENSP00000331730.1	ENSP00000487586.1	ENSP00000428976.1	ENSP00000485687.1	ENSP00000359685.3	ENSP00000428758.1 ENSPSIP00000006702.1	ENSPSIP00000014626.1	ENSPSIP00000008985.1 gopAga1_00002518-RA
OG0000377 XP_014463269.1	XP_014461716.1	XP_014461718.1	XP_014461717.1	XP_006274850.1	XP_014461715.1	XP_006273553.1 ENSACAP00000000557.2	ENSACAP00000013248.3 XP_008168884.1	XP_008165649.1	XP_008165648.1	XP_008165652.1	XP_008165645.1	XP_008165651.1	XP_008165647.1	XP_008165650.1 ENSGALP00000000703.4	ENSGALP00000022412.4	ENSGALP00000021770.3 ENSP00000394097.1	ENSP00000328879.4	ENSP00000405574.1	ENSP00000486324.1	ENSP00000372499.1	ENSP00000347289.2	ENSP00000385988.2	ENSP00000217964.7	ENSP00000370348.1	ENSP00000413251.2 ENSPSIP00000010207.1	ENSPSIP00000019512.1 gopAga1_00009898-RA	gopAga1_00017770-RB	gopAga1_00017770-RA
OG0000378 XP_006274555.1	XP_014462523.1	XP_014458816.1 ENSACAP00000013999.3	ENSACAP00000009989.3	ENSACAP00000009399.3 XP_008172714.1	XP_008165179.1	XP_008165178.1	XP_005290167.1	XP_005290166.1	XP_005294643.1	XP_005294641.1 ENSGALP00000006080.3	ENSGALP00000021289.4 ENSP00000393177.2	ENSP00000312126.4	ENSP00000452250.2	ENSP00000342952.4	ENSP00000254235.3	ENSP00000444803.2	ENSP00000437788.1	ENSP00000378187.2	ENSP00000457409.2	ENSP00000455670.2 ENSPSIP00000012259.1	ENSPSIP00000011548.1	ENSPSIP00000011799.1	ENSPSIP00000011787.1 gopAga1_00019452-RC	gopAga1_00019452-RA	gopAga1_00019452-RD	gopAga1_00011210-RA	gopAga1_00007301-RA	gopAga1_00019452-RB
OG0000379 XP_014452887.1	XP_014454782.1	XP_014464096.1 ENSACAP00000013475.3	ENSACAP00000016185.3	ENSACAP00000006219.3 XP_005279815.1	XP_005309757.1	XP_008165987.1	XP_008177409.1 ENSGALP00000018862.3	ENSGALP00000020203.3	ENSGALP00000020201.3	ENSGALP00000018868.4 ENSP00000478671.1	ENSP00000486292.1	ENSP00000481057.1	ENSP00000399013.1	ENSP00000354778.3	ENSP00000487516.1	ENSP00000487946.1	ENSP00000439733.2	ENSP00000306893.9	ENSP00000297668.6	ENSP00000350863.2	ENSP00000488754.1	ENSP00000477698.1	ENSP00000479811.1	ENSP00000417628.1	ENSP00000418741.1 ENSPSIP00000017553.1	ENSPSIP00000018153.1	ENSPSIP00000018996.1 gopAga1_00003842-RA	gopAga1_00000427-RA
OG0000380 XP_014457748.1	XP_014457749.1	XP_014457750.1	XP_014457751.1	XP_014457752.1	XP_014457747.1	XP_014457753.1 ENSACAP00000004222.2 XP_008177823.1	XP_008177842.1	XP_008177833.1 ENSGALP00000012731.2 ENSP00000432718.1	ENSP00000279452.6	ENSP00000278386.6	ENSP00000404447.2	ENSP00000395953.2	ENSP00000392331.2	ENSP00000398632.2	ENSP00000432704.2	ENSP00000435377.1	ENSP00000263398.6	ENSP00000398099.2	ENSP00000309732.6	ENSP00000434465.1	ENSP00000389830.2	ENSP00000278385.6	ENSP00000432405.1	ENSP00000434920.1	ENSP00000434530.1 ENSPSIP00000011029.1	ENSPSIP00000011023.1 gopAga1_00012254-RA	gopAga1_00012253-RA	gopAga1_00012253-RB
OG0000381 XP_014460020.1	XP_014460021.1 ENSACAP00000002190.3 XP_005284063.2	XP_005284062.2	XP_008171369.1	XP_008171368.1	XP_008171367.1	XP_008171370.1	XP_008171371.1	XP_008171372.1 ENSGALP00000013862.5 ENSP00000323737.7	ENSP00000399858.1	ENSP00000415943.1	ENSP00000395974.1	ENSP00000338020.4	ENSP00000396888.1	ENSP00000407682.1	ENSP00000404754.2	ENSP00000411826.2	ENSP00000371767.3	ENSP00000416255.1	ENSP00000343450.4	ENSP00000317600.8	ENSP00000316879.4	ENSP00000391935.1	ENSP00000376320.2 ENSPSIP00000018702.1	ENSPSIP00000018678.1 gopAga1_00010707-RA	gopAga1_00010707-RB	gopAga1_00010707-RE	gopAga1_00010707-RD	gopAga1_00010707-RC
OG0000382 XP_014460822.1 ENSACAP00000001848.2	ENSACAP00000006320.3 XP_005290231.1	XP_005279693.1 ENSP00000414770.2	ENSP00000404615.2	ENSP00000451816.1	ENSP00000408825.2	ENSP00000394155.2	ENSP00000452424.1	ENSP00000355325.6	ENSP00000414731.2	ENSP00000364016.3	ENSP00000392693.2	ENSP00000406797.2	ENSP00000406878.2	ENSP00000407539.2	ENSP00000397057.2	ENSP00000410205.2	ENSP00000394090.2	ENSP00000395206.2	ENSP00000401868.2	ENSP00000404585.2	ENSP00000364015.2	ENSP00000406913.2	ENSP00000412618.2	ENSP00000396430.2	ENSP00000372725.4	ENSP00000402406.2	ENSP00000378748.3	ENSP00000382538.3	ENSP00000372723.4 gopAga1_00018734-RA	gopAga1_00020086-RA
OG0000383 XP_014461845.1	XP_014461843.1	XP_014461844.1	XP_014461847.1	XP_014461846.1	XP_014461850.1	XP_014461848.1	XP_014461849.1	XP_014461854.1	XP_014461852.1	XP_014461853.1 XP_008177966.1	XP_005300012.1	XP_005300013.1 ENSGALP00000018806.4 ENSP00000487566.1	ENSP00000486862.1	ENSP00000486050.1	ENSP00000486791.1	ENSP00000486560.1	ENSP00000486796.1	ENSP00000487330.1	ENSP00000485980.1	ENSP00000467086.1	ENSP00000419617.1	ENSP00000309132.4	ENSP00000466693.1	ENSP00000417223.2	ENSP00000465663.1	ENSP00000298566.1	ENSP00000379653.1	ENSP00000266434.4	ENSP00000486273.1 ENSPSIP00000009953.1 gopAga1_00004997-RA
OG0000384 XP_014462818.1	XP_014462814.1	XP_014462817.1	XP_014462816.1	XP_014462815.1 ENSACAP00000012294.3 XP_008164176.1	XP_008164170.1	XP_008164172.1	XP_008164166.1	XP_008164165.1	XP_008164177.1	XP_008164179.1	XP_008164181.1	XP_005296734.1	XP_005296732.1	XP_005296730.1	XP_005296726.1	XP_008164182.1	XP_005296736.1	XP_005296735.1	XP_008164180.1	XP_008164159.1 ENSGALP00000022797.3	ENSGALP00000022796.4 ENSP00000443442.1	ENSP00000228425.6	ENSP00000445425.1	ENSP00000314724.8 ENSPSIP00000011218.1 gopAga1_00005808-RD	gopAga1_00005808-RF	gopAga1_00005808-RC	gopAga1_00005808-RB	gopAga1_00005808-RE
OG0000385 XP_014465623.1	XP_014465624.1 ENSACAP00000023018.1	ENSACAP00000001474.2 XP_008161448.1	XP_008161435.1	XP_008161441.1	XP_008161447.1	XP_008161446.1	XP_008161445.1	XP_008161444.1	XP_008161443.1	XP_008161442.1	XP_008161438.1	XP_008161440.1	XP_008161436.1	XP_008161437.1	XP_008161434.1	XP_008161439.1	XP_008161433.1	XP_008161449.1 ENSGALP00000040238.2 ENSP00000362933.2	ENSP00000280772.1	ENSP00000347436.2	ENSP00000425236.1	ENSP00000477827.1	ENSP00000478037.1	ENSP00000479018.1	ENSP00000426944.1 ENSPSIP00000016214.1	ENSPSIP00000016197.1 gopAga1_00000232-RB	gopAga1_00000232-RA	gopAga1_00000231-RA
OG0000386 ENSACAP00000020217.1	ENSACAP00000023048.1	ENSACAP00000019718.1	ENSACAP00000019689.2	ENSACAP00000022246.1	ENSACAP00000019973.1	ENSACAP00000019578.1	ENSACAP00000019353.1	ENSACAP00000018724.1	ENSACAP00000019212.2	ENSACAP00000020258.1	ENSACAP00000019850.1	ENSACAP00000021580.1	ENSACAP00000019930.1	ENSACAP00000021875.1 XP_005305226.1	XP_008176168.1	XP_008176042.1	XP_008161319.1	XP_008168225.1	XP_008173082.1	XP_008171018.1	XP_005304376.1	XP_005300282.2	XP_005280129.1	XP_008168369.1	XP_008178098.1	XP_008169192.1 ENSP00000337034.4	ENSP00000445779.1 ENSPSIP00000001709.1	ENSPSIP00000000162.1	ENSPSIP00000000582.1 gopAga1_00003249-RA	gopAga1_00006724-RA
OG0000387 XP_006263814.1	XP_006258491.1	XP_006258490.1	XP_014451716.1 ENSACAP00000000116.3	ENSACAP00000015561.3	ENSACAP00000011700.3 XP_005311384.1	XP_005290329.1	XP_005290330.1	XP_008173416.1	XP_008165681.1	XP_005288195.1	XP_008173415.1	XP_005311044.1 ENSGALP00000042990.1	ENSGALP00000023563.4	ENSGALP00000012127.4 ENSP00000359300.3	ENSP00000429875.1	ENSP00000428259.1	ENSP00000283122.3	ENSP00000430361.1	ENSP00000319052.3	ENSP00000429772.1	ENSP00000430409.1 ENSPSIP00000013450.1	ENSPSIP00000012623.1	ENSPSIP00000013313.1	ENSPSIP00000013269.1	ENSPSIP00000013460.1 gopAga1_00011707-RA	gopAga1_00018565-RA	gopAga1_00014596-RA
OG0000388 XP_014462045.1	XP_006266891.1	XP_006261100.1	XP_014450296.1 ENSACAP00000007620.3	ENSACAP00000015927.2	ENSACAP00000010503.3 XP_005280844.1	XP_005280846.1	XP_005312635.1	XP_008161276.1	XP_008170020.1 ENSGALP00000003847.3	ENSGALP00000004478.3	ENSGALP00000004477.3	ENSGALP00000025681.3 ENSP00000419295.1	ENSP00000418191.1	ENSP00000486200.1	ENSP00000486160.1	ENSP00000444675.2	ENSP00000384638.4	ENSP00000438476.1	ENSP00000304669.7	ENSP00000427821.1	ENSP00000389714.1	ENSP00000355398.5	ENSP00000341500.3	ENSP00000441705.2 ENSPSIP00000015815.1	ENSPSIP00000010126.1	ENSPSIP00000008124.1 gopAga1_00010323-RA	gopAga1_00009137-RA
OG0000389 XP_014449203.1	XP_014458863.1	XP_006262712.2 ENSACAP00000004130.3	ENSACAP00000004054.2	ENSACAP00000003266.3 XP_005307454.1	XP_008165969.1	XP_008165975.1	XP_008165960.1	XP_008165958.1	XP_008165957.1	XP_005286665.1	XP_005286666.1	XP_005286667.1	XP_005286668.1 ENSGALP00000016337.4	ENSGALP00000027504.4 ENSP00000421552.1	ENSP00000425852.1	ENSP00000422180.1	ENSP00000426669.1	ENSP00000349629.3	ENSP00000486239.1	ENSP00000440233.1	ENSP00000369271.1	ENSP00000369254.3	ENSP00000383295.3	ENSP00000308534.5 ENSPSIP00000010742.1	ENSPSIP00000008149.1	ENSPSIP00000010731.1 gopAga1_00000623-RA	gopAga1_00000626-RA
OG0000390 XP_006263369.1	XP_014458460.1 ENSACAP00000002384.2	ENSACAP00000009664.3 XP_008171168.1	XP_008171172.1	XP_008171170.1	XP_008171175.1	XP_005286153.1	XP_005296089.1	XP_008171191.1	XP_008171190.1	XP_008171202.1	XP_008171196.1	XP_008171199.1	XP_005286154.1	XP_008171208.1	XP_008171183.1 ENSP00000430051.1	ENSP00000373338.1	ENSP00000409246.1	ENSP00000409632.1	ENSP00000403874.1	ENSP00000399191.1	ENSP00000398097.1	ENSP00000312148.7	ENSP00000392549.4	ENSP00000392252.1	ENSP00000266182.6	ENSP00000380427.1 ENSPSIP00000017594.1 gopAga1_00015277-RA	gopAga1_00007411-RA	gopAga1_00015277-RB
OG0000391 XP_014455492.1	XP_014458880.1	XP_006266578.1	XP_006278457.2	XP_006273366.2	XP_006273368.1	XP_014458881.1	XP_014459597.1	XP_014458879.1	XP_006273367.1	XP_014458882.1 ENSACAP00000011109.3	ENSACAP00000015572.2	ENSACAP00000015535.2	ENSACAP00000017552.3	ENSACAP00000013712.3 XP_008174205.1	XP_005279599.1	XP_005312108.1	XP_005294827.1	XP_005279556.1 ENSGALP00000014855.4	ENSGALP00000014825.4 ENSP00000222002.2	ENSP00000201586.1	ENSP00000312880.3 ENSPSIP00000002842.1	ENSPSIP00000018816.1	ENSPSIP00000005532.1	ENSPSIP00000008022.1	ENSPSIP00000010128.1	ENSPSIP00000010625.1 gopAga1_00016955-RA	gopAga1_00019910-RA
OG0000392 XP_014464038.1	XP_006272178.2	XP_014458884.1	XP_006266937.2 ENSACAP00000015453.3	ENSACAP00000007757.2	ENSACAP00000023186.1 XP_005280702.1	XP_005278985.1	XP_008168205.1	XP_008168207.1	XP_005281653.1	XP_005281654.1 ENSGALP00000003995.4	ENSGALP00000041436.1 ENSP00000476519.1	ENSP00000484926.1	ENSP00000264773.2	ENSP00000427120.3	ENSP00000421095.1	ENSP00000483124.1	ENSP00000487849.1	ENSP00000421439.1	ENSP00000271915.3	ENSP00000481848.1	ENSP00000351295.2	ENSP00000354764.4 ENSPSIP00000014547.1	ENSPSIP00000008319.1	ENSPSIP00000017829.1 gopAga1_00006422-RA	gopAga1_00004269-RA	gopAga1_00001823-RA	gopAga1_00001824-RA
OG0000393 XP_014465799.1	XP_006267925.1	XP_006270029.1 ENSACAP00000002765.3	ENSACAP00000019166.1	ENSACAP00000004912.2	ENSACAP00000006541.2 XP_005291373.1	XP_005291374.1	XP_005313056.1	XP_005282563.1	XP_005287112.1	XP_005287113.1 ENSGALP00000023265.4	ENSGALP00000008830.3	ENSGALP00000034600.3 ENSP00000054666.6	ENSP00000465820.1	ENSP00000444181.1	ENSP00000379602.3	ENSP00000464383.1	ENSP00000355122.3	ENSP00000383702.3	ENSP00000467399.1	ENSP00000314214.6	ENSP00000466995.1	ENSP00000418572.1 ENSPSIP00000007116.1	ENSPSIP00000018589.1	ENSPSIP00000018584.1	ENSPSIP00000017984.1 gopAga1_00007667-RB	gopAga1_00002809-RA	gopAga1_00007667-RA
OG0000394 XP_014449511.1	XP_014449510.1	XP_014449509.1	XP_014449508.1	XP_014449515.1	XP_014449514.1	XP_014449513.1	XP_014449512.1	XP_014449507.1	XP_014449517.1	XP_014449516.1	XP_014449519.1	XP_014449522.1	XP_014449523.1	XP_014449520.1	XP_014449521.1	XP_006278217.1	XP_006268979.2	XP_014449518.1	XP_014449524.1 ENSACAP00000010889.3	ENSACAP00000015592.3 XP_005304055.1	XP_008166943.1	XP_008166942.1 ENSGALP00000023944.4 ENSP00000264663.5	ENSP00000343873.4 ENSPSIP00000020633.1	ENSPSIP00000020632.1	ENSPSIP00000008885.1 gopAga1_00014229-RA	gopAga1_00014229-RB	gopAga1_00003076-RA
OG0000395 XP_006270148.1	XP_006270147.1	XP_014450046.1	XP_014450047.1	XP_014450045.1	XP_006270150.1	XP_006270149.1	XP_014450048.1	XP_006270151.1	XP_006270146.1	XP_006270145.1 ENSACAP00000016249.3 XP_005308363.1	XP_005308364.1	XP_008172003.1	XP_008172002.1	XP_008172001.1	XP_008172000.1	XP_005308372.1	XP_005308367.1	XP_005308365.1	XP_005308366.1	XP_008171996.1	XP_008171997.1	XP_008171998.1	XP_008171999.1 ENSGALP00000005125.2 ENSP00000229418.6	ENSP00000345702.6 ENSPSIP00000014871.1	ENSPSIP00000014858.1 gopAga1_00015322-RA	gopAga1_00015322-RB	gopAga1_00015322-RC
OG0000396 XP_014449888.1	XP_014449889.1	XP_014449890.1	XP_014449891.1	XP_014449892.1	XP_014449893.1	XP_014449894.1	XP_014449895.1	XP_014449896.1	XP_014449897.1	XP_014449887.1	XP_014449886.1	XP_014449899.1	XP_014449898.1	XP_014449901.1	XP_014449900.1	XP_014458216.1	XP_006271331.1 ENSACAP00000004598.2	ENSACAP00000009627.3 XP_005296556.1	XP_005296558.1	XP_008173420.1	XP_008167558.1 ENSGALP00000021453.4	ENSGALP00000006993.4 ENSP00000383168.1	ENSP00000383163.1	ENSP00000401198.2	ENSP00000383165.1	ENSP00000383164.1	ENSP00000383160.1	ENSP00000383159.1 ENSPSIP00000016884.1
OG0000397 XP_006271895.1	XP_014458668.1	XP_014458665.1	XP_014458664.1	XP_014458663.1	XP_014458667.1	XP_014458666.1	XP_006271896.1	XP_006271897.1	XP_006271892.1	XP_006271893.1	XP_006271894.1	XP_006271898.1	XP_006271891.1	XP_006271901.1	XP_006271900.1	XP_006271899.1 ENSACAP00000011012.3	ENSACAP00000008742.3 XP_005297120.1	XP_005297123.1 ENSGALP00000018392.4 ENSP00000401053.1	ENSP00000303709.3	ENSP00000379931.1	ENSP00000411351.1	ENSP00000475890.1	ENSP00000410652.1	ENSP00000329113.4	ENSP00000393088.1	ENSP00000484777.1 ENSPSIP00000009579.1	ENSPSIP00000009778.1 gopAga1_00002217-RA
OG0000398 XP_014452653.1	XP_006274950.1	XP_014452645.1	XP_006274924.1	XP_006273076.2	XP_006274923.1 ENSACAP00000013129.3	ENSACAP00000017309.3	ENSACAP00000004578.3	ENSACAP00000022039.1 XP_005289296.1	XP_005315524.1	XP_005289824.1	XP_005289825.1	XP_008165154.1	XP_005315578.1	XP_005289829.1 ENSGALP00000011673.3 ENSP00000366525.2	ENSP00000484043.1	ENSP00000484477.1	ENSP00000436947.1	ENSP00000435111.1	ENSP00000433321.1	ENSP00000432223.1	ENSP00000273550.7 ENSPSIP00000019877.1	ENSPSIP00000019884.1 gopAga1_00007818-RA	gopAga1_00007814-RA	gopAga1_00007815-RA	gopAga1_00007811-RA	gopAga1_00007817-RA	gopAga1_00014602-RA
OG0000399 XP_006273117.2	XP_014452440.1	XP_014452441.1 ENSACAP00000003962.2	ENSACAP00000003800.3 XP_005290174.1	XP_005308624.1	XP_008172718.1	XP_005290173.1	XP_005290172.1	XP_005290175.1	XP_005290171.1 ENSGALP00000043066.1	ENSGALP00000020714.4 ENSP00000480342.1	ENSP00000334409.10	ENSP00000454038.1	ENSP00000453761.1	ENSP00000405743.3	ENSP00000453537.1	ENSP00000392859.2	ENSP00000382369.2	ENSP00000259727.4	ENSP00000347449.4	ENSP00000453299.1	ENSP00000453355.1	ENSP00000453714.1	ENSP00000454009.1 ENSPSIP00000008000.1	ENSPSIP00000017346.1	ENSPSIP00000007992.1 gopAga1_00018374-RC	gopAga1_00018374-RB	gopAga1_00018374-RA
OG0000400 XP_014449273.1	XP_014449265.1	XP_014449280.1	XP_006273496.2	XP_006273141.1	XP_006273142.1	XP_014449277.1 ENSACAP00000002658.3	ENSACAP00000010119.2 XP_005293908.1	XP_008164309.1	XP_008164307.1	XP_008164306.1	XP_008164305.1	XP_005307419.1	XP_005307423.1	XP_005307424.1	XP_005307420.1	XP_005307421.1	XP_005307425.1 ENSGALP00000027965.3	ENSGALP00000016409.4 ENSP00000296555.4	ENSP00000263981.4	ENSP00000474751.1	ENSP00000474971.1	ENSP00000474725.1	ENSP00000377528.3	ENSP00000474538.1	ENSP00000281708.3 ENSPSIP00000019645.1 gopAga1_00001441-RA	gopAga1_00001442-RA	gopAga1_00018320-RA
OG0000401 XP_014460006.1	XP_014456246.1	XP_014456247.1	XP_014460005.1	XP_014452133.1	XP_014452134.1 ENSACAP00000019526.1 XP_008171640.1	XP_005307918.2	XP_005307917.1 ENSP00000442457.1	ENSP00000438649.1	ENSP00000445338.1	ENSP00000440428.1	ENSP00000387737.2	ENSP00000353500.3	ENSP00000346648.5	ENSP00000404994.2	ENSP00000443328.1	ENSP00000443034.1	ENSP00000247243.5	ENSP00000353690.3	ENSP00000371496.2	ENSP00000299663.3	ENSP00000229332.5	ENSP00000344646.3	ENSP00000299665.2	ENSP00000371505.3 ENSPSIP00000008560.1	ENSPSIP00000007660.1 gopAga1_00011529-RA	gopAga1_00017997-RA	gopAga1_00011530-RA	gopAga1_00011531-RA
OG0000402 XP_014456766.1 ENSACAP00000023483.1	ENSACAP00000010755.3	ENSACAP00000022747.1 XP_005309294.1	XP_005309293.1	XP_005309292.1	XP_008172555.1	XP_008175595.1 ENSP00000471759.1	ENSP00000472977.1	ENSP00000469528.1	ENSP00000470418.1	ENSP00000472546.1	ENSP00000469473.1	ENSP00000346228.2 ENSPSIP00000008185.1	ENSPSIP00000002739.1	ENSPSIP00000007861.1	ENSPSIP00000007868.1	ENSPSIP00000015853.1	ENSPSIP00000002849.1	ENSPSIP00000010696.1	ENSPSIP00000005925.1	ENSPSIP00000002854.1	ENSPSIP00000004461.1 gopAga1_00008488-RB	gopAga1_00008488-RC	gopAga1_00013930-RA	gopAga1_00008488-RA	gopAga1_00012970-RB	gopAga1_00013930-RB	gopAga1_00012970-RC	gopAga1_00012970-RA
OG0000403 XP_014464667.1	XP_014464666.1	XP_014464661.1	XP_014464665.1	XP_014464664.1 XP_008175954.1	XP_008175598.1	XP_008175945.1	XP_008174767.1	XP_008175640.1	XP_008168308.1	XP_008176135.1	XP_008175572.1	XP_008175297.1	XP_008175679.1 ENSGALP00000023692.4	ENSGALP00000035136.2	ENSGALP00000018033.4	ENSGALP00000003462.4	ENSGALP00000004630.4 ENSPSIP00000014258.1	ENSPSIP00000010977.1	ENSPSIP00000017451.1	ENSPSIP00000019339.1	ENSPSIP00000008563.1	ENSPSIP00000008558.1	ENSPSIP00000013427.1 gopAga1_00018471-RA	gopAga1_00014455-RA	gopAga1_00016690-RA	gopAga1_00019465-RA	gopAga1_00006667-RA	gopAga1_00006667-RC	gopAga1_00006667-RB
OG0000404 ENSACAP00000020719.1	ENSACAP00000019065.1	ENSACAP00000022475.1	ENSACAP00000020670.1	ENSACAP00000022719.1	ENSACAP00000023268.1	ENSACAP00000018680.1	ENSACAP00000022086.1	ENSACAP00000022492.1	ENSACAP00000022527.1	ENSACAP00000020064.1	ENSACAP00000019704.1	ENSACAP00000018868.1	ENSACAP00000021497.1	ENSACAP00000022872.1	ENSACAP00000019264.1	ENSACAP00000022973.1	ENSACAP00000020482.1	ENSACAP00000019335.1	ENSACAP00000018186.1	ENSACAP00000018014.1	ENSACAP00000019741.1	ENSACAP00000022519.1	ENSACAP00000020147.1	ENSACAP00000018231.1	ENSACAP00000019923.1 XP_008171731.1 ENSP00000476915.1	ENSP00000421786.1	ENSP00000425047.1	ENSP00000359744.6	ENSP00000359736.1	ENSP00000359742.4 ENSPSIP00000001792.1
OG0000405 XP_014454319.1	XP_014454318.1	XP_014453529.1	XP_014453530.1	XP_006257941.2 ENSACAP00000002260.2	ENSACAP00000021700.1 XP_005289558.1	XP_005289559.1	XP_005289562.1	XP_005289555.1	XP_005289556.1	XP_005289557.1	XP_005289560.1	XP_008166465.1	XP_008166464.1	XP_008166463.1	XP_008166462.1	XP_008166461.1 ENSGALP00000019582.4	ENSGALP00000037454.2 ENSP00000381876.2	ENSP00000437808.1	ENSP00000274867.4	ENSP00000378557.1	ENSP00000354162.3	ENSP00000488831.1 ENSPSIP00000005629.1	ENSPSIP00000011841.1	ENSPSIP00000011845.1	ENSPSIP00000005624.1 gopAga1_00010872-RA	gopAga1_00010873-RA
OG0000406 XP_014462250.1	XP_006258250.1	XP_014456615.1	XP_014456614.1	XP_006269413.2 ENSACAP00000005135.3	ENSACAP00000008136.2	ENSACAP00000017665.2	ENSACAP00000010462.2 XP_005288190.1	XP_005297382.1	XP_005303601.1 ENSGALP00000026544.2	ENSGALP00000002383.4	ENSGALP00000033584.3 ENSP00000345236.7	ENSP00000285735.2	ENSP00000358656.3	ENSP00000358652.2	ENSP00000358651.1	ENSP00000408402.1	ENSP00000358647.2	ENSP00000358646.2	ENSP00000436240.1	ENSP00000390823.2	ENSP00000399424.2	ENSP00000400175.1	ENSP00000272233.4 ENSPSIP00000012849.1	ENSPSIP00000003882.1	ENSPSIP00000017249.1 gopAga1_00004901-RA	gopAga1_00009809-RA
OG0000407 XP_006258762.1	XP_006258763.1	XP_006269937.1	XP_006269938.1	XP_006269939.2 ENSACAP00000000183.3	ENSACAP00000017056.2	ENSACAP00000003448.3	ENSACAP00000022570.1 XP_008165339.1	XP_005291101.1	XP_005291102.1	XP_008165341.1	XP_008165340.1	XP_008165342.1	XP_008163363.1	XP_005298439.1 ENSGALP00000026044.4	ENSGALP00000003521.3	ENSGALP00000003523.4 ENSP00000220592.5	ENSP00000430176.1	ENSP00000362300.4	ENSP00000362302.1	ENSP00000362287.3	ENSP00000362306.3 ENSPSIP00000019796.1	ENSPSIP00000015810.1	ENSPSIP00000004340.1	ENSPSIP00000008050.1 gopAga1_00002032-RA	gopAga1_00002031-RA	gopAga1_00002030-RA
OG0000408 XP_014455565.1	XP_014455566.1	XP_006270085.1	XP_006259456.1	XP_014452311.1	XP_006270112.1	XP_006259449.1	XP_006259450.1 ENSACAP00000008256.2	ENSACAP00000003154.3	ENSACAP00000008421.3	ENSACAP00000023086.1	ENSACAP00000008369.2 XP_008174041.1	XP_008173880.1	XP_005296323.1	XP_005304033.1	XP_005296299.1	XP_005296399.1 ENSGALP00000017229.3	ENSGALP00000018372.3	ENSGALP00000041523.1	ENSGALP00000031198.2 ENSP00000444081.1	ENSP00000384950.1 ENSPSIP00000007564.1	ENSPSIP00000005660.1	ENSPSIP00000005804.1	ENSPSIP00000007986.1 gopAga1_00014051-RA	gopAga1_00007281-RA	gopAga1_00014052-RA	gopAga1_00016342-RA
OG0000409 XP_006259541.2	XP_014462613.1 ENSACAP00000016264.2	ENSACAP00000023133.1 XP_008174666.1	XP_008174667.1	XP_008174668.1	XP_008175076.1 ENSGALP00000042419.1 ENSP00000478555.1	ENSP00000466395.1	ENSP00000466988.1	ENSP00000221307.6	ENSP00000468105.1	ENSP00000478605.1	ENSP00000469866.1	ENSP00000448998.1	ENSP00000248041.6	ENSP00000319859.7	ENSP00000481243.1	ENSP00000384588.2	ENSP00000476972.1	ENSP00000269703.1	ENSP00000011989.8	ENSP00000477567.1	ENSP00000221700.3	ENSP00000321821.9 ENSPSIP00000011752.1 gopAga1_00017764-RA	gopAga1_00018029-RD	gopAga1_00018029-RA	gopAga1_00018029-RB	gopAga1_00018029-RC
OG0000410 XP_006260457.1	XP_006275386.1	XP_006278035.1	XP_006264693.1 ENSACAP00000006769.1	ENSACAP00000008084.1	ENSACAP00000002815.2 XP_005288408.1	XP_005286341.1	XP_005308473.1	XP_005311784.1 ENSGALP00000009007.4	ENSGALP00000038376.2 ENSP00000000233.5	ENSP00000395370.2	ENSP00000256682.4	ENSP00000438510.1	ENSP00000420254.1	ENSP00000412701.1	ENSP00000417501.1	ENSP00000306010.6	ENSP00000272102.5	ENSP00000442980.1	ENSP00000440005.1 ENSPSIP00000005220.1	ENSPSIP00000010797.1	ENSPSIP00000010803.1 gopAga1_00011859-RA	gopAga1_00001571-RA	gopAga1_00015360-RA	gopAga1_00018335-RB	gopAga1_00018335-RA	gopAga1_00002268-RA
OG0000411 XP_006261041.1 XP_005314206.1 ENSGALP00000040584.1 ENSP00000477788.1	ENSP00000378118.1	ENSP00000480147.1	ENSP00000219244.4	ENSP00000484078.1	ENSP00000488746.1	ENSP00000367832.2	ENSP00000481402.1	ENSP00000481940.1	ENSP00000302234.3	ENSP00000463667.1	ENSP00000225844.2	ENSP00000219235.4	ENSP00000483186.1	ENSP00000483144.1	ENSP00000005180.4	ENSP00000378365.2	ENSP00000488638.1	ENSP00000487982.1	ENSP00000488545.1	ENSP00000484818.1	ENSP00000483347.1	ENSP00000482426.2	ENSP00000484262.1	ENSP00000483302.1	ENSP00000225831.4	ENSP00000479955.1	ENSP00000479097.1 gopAga1_00016927-RA	gopAga1_00012199-RA
OG0000412 XP_006262884.1	XP_006265772.2	XP_006262885.2 ENSACAP00000007114.3	ENSACAP00000008197.3 XP_005294224.1	XP_005294228.1	XP_005294229.1	XP_005294226.1	XP_005294227.1	XP_005294230.1	XP_008160971.1	XP_005294126.1	XP_008160993.1	XP_005294125.1 ENSGALP00000033517.3 ENSP00000362305.1	ENSP00000398568.1 ENSPSIP00000006245.1	ENSPSIP00000006659.1	ENSPSIP00000006756.1	ENSPSIP00000006717.1	ENSPSIP00000010263.1	ENSPSIP00000006690.1	ENSPSIP00000007231.1	ENSPSIP00000007024.1 gopAga1_00016053-RA	gopAga1_00016054-RA	gopAga1_00018276-RA	gopAga1_00018279-RA	gopAga1_00018278-RA	gopAga1_00019736-RA	gopAga1_00016048-RA
OG0000413 XP_014464817.1	XP_014464827.1	XP_014464823.1	XP_006263172.1	XP_014464807.1	XP_014464804.1 ENSACAP00000011703.3 XP_008162476.1	XP_005288111.1	XP_005288104.1	XP_005288112.1	XP_005288108.1	XP_005288109.1	XP_005288110.1	XP_008162474.1	XP_005288105.1	XP_005288106.1	XP_005288107.1 ENSGALP00000021314.3 ENSP00000393621.1	ENSP00000407522.1	ENSP00000354513.2	ENSP00000354826.2	ENSP00000411476.2	ENSP00000395710.1	ENSP00000398826.1	ENSP00000376826.2	ENSP00000419673.1 ENSPSIP00000008302.1 gopAga1_00009261-RC	gopAga1_00009261-RB	gopAga1_00009261-RD	gopAga1_00009261-RA
OG0000414 XP_006263912.2	XP_014463223.1 ENSACAP00000001185.3 XP_008164458.1	XP_005303499.1	XP_005303500.1	XP_005303501.1 ENSGALP00000023228.4 ENSP00000423499.1	ENSP00000422425.1	ENSP00000421570.1	ENSP00000422394.1	ENSP00000426643.1	ENSP00000424391.1	ENSP00000423536.1	ENSP00000425938.1	ENSP00000425461.1	ENSP00000425102.1	ENSP00000423881.1	ENSP00000422962.1	ENSP00000423914.2	ENSP00000423477.1	ENSP00000426286.1	ENSP00000422499.1	ENSP00000295290.8	ENSP00000354171.4	ENSP00000421687.1	ENSP00000420948.1 ENSPSIP00000016145.1 gopAga1_00008823-RA	gopAga1_00008823-RC	gopAga1_00008823-RB	gopAga1_00008823-RD
OG0000415 XP_006264412.2	XP_014455126.1	XP_014459956.1	XP_014449612.1 ENSACAP00000013675.3	ENSACAP00000011040.2	ENSACAP00000007016.3 XP_008167093.1	XP_005281056.1	XP_005281055.1	XP_005280797.2	XP_008165038.1	XP_008165037.1	XP_008166939.1	XP_008166940.1	XP_008170185.1	XP_008170184.1	XP_008170187.1	XP_008170186.1 ENSGALP00000023952.5	ENSGALP00000038157.2	ENSGALP00000002705.4	ENSGALP00000002046.4 ENSP00000458364.1	ENSP00000261917.3	ENSP00000307342.4	ENSP00000251287.1	ENSP00000357342.3 ENSPSIP00000013788.1	ENSPSIP00000004682.1 gopAga1_00005166-RA	gopAga1_00004470-RA	gopAga1_00004057-RA
OG0000416 XP_014460792.1	XP_014460791.1	XP_014460192.1	XP_006267725.1	XP_014460191.1	XP_006264619.1	XP_006268549.2 ENSACAP00000017684.1	ENSACAP00000000016.2	ENSACAP00000005261.2 XP_005297110.1	XP_005294129.1	XP_005311133.1 ENSGALP00000041857.1	ENSGALP00000018371.1	ENSGALP00000005302.3 ENSP00000273047.4	ENSP00000468275.1	ENSP00000391319.2	ENSP00000450168.1	ENSP00000353444.5	ENSP00000411941.1	ENSP00000447895.1	ENSP00000377440.3	ENSP00000345689.4	ENSP00000447053.1 ENSPSIP00000003195.1	ENSPSIP00000007889.1	ENSPSIP00000016824.1 gopAga1_00013489-RB	gopAga1_00013489-RA	gopAga1_00013836-RA	gopAga1_00001802-RA
OG0000417 XP_014458118.1	XP_006278601.1	XP_006278600.1	XP_006264778.1 ENSACAP00000013893.3	ENSACAP00000006887.1	ENSACAP00000001440.2 XP_005278544.1	XP_005294013.1	XP_005294014.1	XP_005278545.1	XP_005278542.1	XP_005278543.1 ENSGALP00000003794.4	ENSGALP00000003793.4	ENSGALP00000019941.4 ENSP00000307701.3	ENSP00000423916.1	ENSP00000309036.8	ENSP00000426650.1	ENSP00000422053.1	ENSP00000423957.1	ENSP00000396270.2	ENSP00000344076.6	ENSP00000361231.1	ENSP00000361237.3	ENSP00000480263.1	ENSP00000361230.2	ENSP00000361229.1 ENSPSIP00000019959.1	ENSPSIP00000020391.1 gopAga1_00007335-RA	gopAga1_00009027-RA
OG0000418 XP_014466194.1	XP_006265331.1	XP_006265332.1	XP_006265333.1	XP_006270769.2	XP_006270304.1 ENSACAP00000012717.2	ENSACAP00000010005.2	ENSACAP00000015818.2 XP_005283206.1	XP_008162862.1	XP_005302513.1 ENSGALP00000011538.2	ENSGALP00000004504.4	ENSGALP00000037001.1 ENSP00000385590.1	ENSP00000403778.1	ENSP00000385270.1	ENSP00000249071.6	ENSP00000463590.1	ENSP00000304283.4	ENSP00000348461.4	ENSP00000258737.7	ENSP00000462421.1 ENSPSIP00000014851.1	ENSPSIP00000014127.1	ENSPSIP00000007879.1	ENSPSIP00000007880.1 gopAga1_00016284-RA	gopAga1_00017212-RB	gopAga1_00017212-RA	gopAga1_00013610-RA	gopAga1_00016284-RB
OG0000419 XP_014461524.1	XP_014461523.1	XP_014461522.1	XP_014461521.1	XP_006268237.1 ENSACAP00000004627.2 XP_008161589.1	XP_008161602.1	XP_008161616.1	XP_008161607.1	XP_008161625.1	XP_008161633.1	XP_008161623.1	XP_008161597.1	XP_008161585.1	XP_005304092.1	XP_008161620.1	XP_008161562.1	XP_008161578.1	XP_008161568.1 ENSGALP00000007721.4 ENSP00000442040.1	ENSP00000348276.3	ENSP00000350770.4	ENSP00000374079.3	ENSP00000324857.5	ENSP00000346786.4	ENSP00000453661.1	ENSP00000374076.3	ENSP00000446152.2	ENSP00000452815.1 ENSPSIP00000019950.1 gopAga1_00006364-RA
OG0000420 XP_006268403.2	XP_014466788.1	XP_014466787.1 ENSACAP00000015815.2 XP_005301609.1	XP_008162655.1	XP_005301613.1	XP_005301612.1	XP_005301611.1	XP_008162645.1	XP_005301610.1	XP_008162661.1	XP_008162666.1 ENSGALP00000016543.4 ENSP00000379468.4	ENSP00000280083.3	ENSP00000474204.1	ENSP00000417289.1	ENSP00000452252.1	ENSP00000343897.3	ENSP00000450869.1	ENSP00000419539.1	ENSP00000395587.2	ENSP00000489019.1	ENSP00000375220.2	ENSP00000474388.1	ENSP00000379462.2	ENSP00000452562.1	ENSP00000339286.5	ENSP00000450449.1	ENSP00000343912.3 ENSPSIP00000015831.1 gopAga1_00004988-RA
OG0000421 XP_014457395.1	XP_014457394.1	XP_006269276.1	XP_014454414.1	XP_006269273.1	XP_006269274.2	XP_006269275.1 ENSACAP00000006464.2	ENSACAP00000015902.3 XP_005295315.1	XP_005295316.1	XP_005295317.1	XP_005297616.1	XP_008162090.1	XP_008162088.1 ENSGALP00000002573.4	ENSGALP00000003293.4 ENSP00000251170.6	ENSP00000406030.3	ENSP00000376268.2	ENSP00000408169.3	ENSP00000389838.1	ENSP00000468423.1	ENSP00000466581.1	ENSP00000390392.3	ENSP00000467934.1 ENSPSIP00000017229.1	ENSPSIP00000007507.1	ENSPSIP00000007498.1 gopAga1_00003068-RA	gopAga1_00016465-RA	gopAga1_00016465-RB	gopAga1_00016465-RC
OG0000422 XP_014457208.1	XP_014462561.1	XP_014462562.1	XP_014462563.1	XP_014462564.1	XP_006270227.1	XP_006270228.1	XP_006270229.1	XP_006270230.1	XP_006269421.2 ENSACAP00000001761.2	ENSACAP00000014963.2	ENSACAP00000023228.1 XP_008166535.1	XP_008166534.1	XP_005294069.1	XP_005294070.1	XP_008166533.1 ENSGALP00000028857.3	ENSGALP00000003546.4 ENSP00000363216.4	ENSP00000390240.1	ENSP00000388183.1	ENSP00000392878.1	ENSP00000414662.1	ENSP00000398576.2	ENSP00000222673.5	ENSP00000486854.1	ENSP00000401356.1 ENSPSIP00000004315.1	ENSPSIP00000010664.1 gopAga1_00013544-RA	gopAga1_00009400-RA
OG0000423 XP_006269661.2	XP_006269658.2 ENSACAP00000014707.3	ENSACAP00000004445.3	ENSACAP00000004454.2	ENSACAP00000013372.3 XP_008171882.1	XP_005296039.1	XP_008171591.1	XP_005292397.1 ENSGALP00000035462.2	ENSGALP00000012817.4	ENSGALP00000012842.3 ENSP00000222399.6	ENSP00000377191.1	ENSP00000377190.1	ENSP00000388325.1	ENSP00000307156.4	ENSP00000373433.3	ENSP00000205386.4	ENSP00000402353.2	ENSP00000416562.1 ENSPSIP00000010026.1	ENSPSIP00000011333.1	ENSPSIP00000009957.1	ENSPSIP00000011306.1 gopAga1_00017711-RA	gopAga1_00019789-RA	gopAga1_00018597-RA	gopAga1_00015899-RA	gopAga1_00019686-RA	gopAga1_00013225-RA	gopAga1_00013224-RA
OG0000424 XP_014450054.1	XP_006270154.1	XP_014462813.1	XP_014460900.1	XP_014460893.1 ENSACAP00000011934.3	ENSACAP00000016179.3	ENSACAP00000010080.3 XP_008166285.1	XP_008166286.1	XP_008166288.1	XP_008166289.1	XP_005309413.1	XP_005288575.1	XP_008164290.1 ENSGALP00000013491.4	ENSGALP00000004972.5	ENSGALP00000022744.4 ENSP00000363435.4	ENSP00000370744.3	ENSP00000475177.1	ENSP00000397885.2	ENSP00000349597.4	ENSP00000346595.7 ENSPSIP00000020327.1	ENSPSIP00000015429.1	ENSPSIP00000020334.1	ENSPSIP00000019904.1	ENSPSIP00000019753.1 gopAga1_00011115-RB	gopAga1_00011115-RC	gopAga1_00003578-RA	gopAga1_00005018-RA
OG0000425 XP_006273238.2	XP_014455360.1	XP_014455361.1 XP_005290565.1	XP_005290556.1	XP_005290554.1	XP_008165043.1	XP_008165040.1 ENSGALP00000002238.4	ENSGALP00000002123.4 ENSP00000378567.3	ENSP00000457032.1	ENSP00000353004.4	ENSP00000457669.1	ENSP00000456989.1	ENSP00000395576.2	ENSP00000457023.1	ENSP00000455612.1	ENSP00000456486.1	ENSP00000456277.1	ENSP00000394642.3	ENSP00000268059.6	ENSP00000315434.8	ENSP00000268058.3	ENSP00000455838.1	ENSP00000378564.2 ENSPSIP00000016315.1	ENSPSIP00000010172.1 gopAga1_00009603-RA	gopAga1_00009602-RB	gopAga1_00009602-RC	gopAga1_00018717-RA	gopAga1_00009602-RA
OG0000426 XP_006273452.1	XP_014465891.1	XP_014465892.1	XP_006276039.1 ENSACAP00000005693.1	ENSACAP00000004567.1 XP_008168890.1	XP_005312060.1	XP_005292995.1	XP_005286017.2 ENSGALP00000002038.3	ENSGALP00000039575.2	ENSGALP00000014596.4 ENSP00000389391.1	ENSP00000401873.1	ENSP00000305260.4	ENSP00000414734.2	ENSP00000377501.1	ENSP00000367872.3	ENSP00000232564.3	ENSP00000419693.1	ENSP00000483532.1	ENSP00000481878.1	ENSP00000400286.1	ENSP00000390543.1	ENSP00000377503.1	ENSP00000229264.3 ENSPSIP00000010067.1	ENSPSIP00000010877.1	ENSPSIP00000014592.1	ENSPSIP00000015852.1 gopAga1_00007828-RA	gopAga1_00004716-RA
OG0000427 XP_014457147.1	XP_014457148.1	XP_006274534.2	XP_014457149.1 ENSACAP00000010788.2	ENSACAP00000001463.3 XP_005293845.1 ENSGALP00000043376.1 ENSP00000377319.2	ENSP00000420297.1	ENSP00000336528.4	ENSP00000424834.1	ENSP00000423666.1	ENSP00000356961.4	ENSP00000412672.2	ENSP00000424934.1	ENSP00000406493.2	ENSP00000399361.2	ENSP00000356965.3	ENSP00000424345.1	ENSP00000427175.1	ENSP00000407446.2	ENSP00000356962.4	ENSP00000423089.1	ENSP00000356963.4	ENSP00000356959.2	ENSP00000421588.1	ENSP00000356960.3	ENSP00000356958.2	ENSP00000425417.1	ENSP00000427034.1 ENSPSIP00000004770.1 gopAga1_00017094-RA
OG0000428 XP_006274843.1 ENSACAP00000012754.3 XP_005283171.1 ENSGALP00000000321.3 ENSP00000483387.1	ENSP00000487602.1	ENSP00000478915.1	ENSP00000481726.1	ENSP00000482981.1	ENSP00000488202.1	ENSP00000487935.1	ENSP00000478597.1	ENSP00000488583.1	ENSP00000488160.1	ENSP00000487670.1	ENSP00000477995.1	ENSP00000483933.1	ENSP00000477869.1	ENSP00000482288.1	ENSP00000479310.1	ENSP00000483549.1	ENSP00000481648.1	ENSP00000479622.1	ENSP00000480131.1	ENSP00000488806.1	ENSP00000488617.1	ENSP00000488876.1	ENSP00000481061.1	ENSP00000483566.1	ENSP00000483890.1 ENSPSIP00000005859.1 gopAga1_00003216-RA	gopAga1_00003216-RB
OG0000429 XP_014459313.1	XP_014459329.1	XP_014459318.1	XP_014459324.1	XP_006275253.2 ENSACAP00000014637.2 XP_005298254.1	XP_005298263.1	XP_005298256.1	XP_008167200.1	XP_008167201.1	XP_008167203.1	XP_008167204.1	XP_008167205.1	XP_005298253.1	XP_005298255.1	XP_005298257.1	XP_005298262.1	XP_005298252.1 ENSGALP00000007118.3 ENSP00000379198.4	ENSP00000387727.1	ENSP00000379190.2	ENSP00000379192.1	ENSP00000268712.2	ENSP00000407998.1	ENSP00000462308.1	ENSP00000379189.1 ENSPSIP00000006147.1	ENSPSIP00000006302.1 gopAga1_00001295-RA	gopAga1_00001294-RA	gopAga1_00001294-RB
OG0000430 XP_014452273.1	XP_006277464.2 ENSACAP00000002674.3 XP_005304021.1	XP_005304023.1	XP_005304019.1	XP_005304020.1	XP_005304017.1	XP_005304018.1	XP_005304024.1	XP_005304025.1	XP_005304016.1	XP_008173937.1	XP_008173957.1 ENSGALP00000018217.4 ENSP00000483666.2	ENSP00000486399.1	ENSP00000483960.2	ENSP00000480327.1	ENSP00000483849.2	ENSP00000486419.1	ENSP00000375945.4	ENSP00000355735.3	ENSP00000468124.1	ENSP00000397661.2	ENSP00000468240.1	ENSP00000355734.1 ENSPSIP00000009968.1	ENSPSIP00000009961.1 gopAga1_00010237-RD	gopAga1_00010237-RC	gopAga1_00010237-RB	gopAga1_00010237-RA
OG0000431 XP_014466966.1	XP_014466967.1	XP_014466970.1	XP_014466969.1	XP_014466968.1	XP_014466962.1	XP_014466963.1	XP_014466965.1	XP_014466964.1	XP_006278203.1	XP_006278204.1 ENSACAP00000009896.3 XP_008163389.1	XP_005288857.1	XP_005288850.1	XP_005288849.1	XP_005288851.1	XP_005288848.1	XP_005288854.1	XP_005288852.1	XP_005288853.1	XP_005288856.1 ENSGALP00000026298.2 ENSP00000429064.1	ENSP00000428685.1	ENSP00000367256.3	ENSP00000428319.1	ENSP00000428348.1	ENSP00000393606.2	ENSP00000322804.5 ENSPSIP00000009757.1	ENSPSIP00000009769.1 gopAga1_00013942-RA
OG0000432 XP_014449144.1	XP_014449146.1	XP_014449147.1	XP_014449139.1	XP_014449141.1	XP_014449142.1	XP_014449145.1	XP_014449143.1 ENSACAP00000004107.3 XP_008170276.1 ENSGALP00000033167.3 ENSP00000405541.1	ENSP00000389364.1	ENSP00000383146.1	ENSP00000398871.2	ENSP00000401199.1	ENSP00000383145.2	ENSP00000443025.1	ENSP00000430488.1	ENSP00000402679.1 ENSPSIP00000019871.1 gopAga1_00008384-RG	gopAga1_00008384-RB	gopAga1_00008384-RD	gopAga1_00008384-RC	gopAga1_00008384-RE	gopAga1_00008384-RI	gopAga1_00008384-RF	gopAga1_00008384-RJ	gopAga1_00008384-RA	gopAga1_00008384-RH	gopAga1_00008384-RK	gopAga1_00008384-RL
OG0000433 XP_014449313.1	XP_014449312.1	XP_014449315.1	XP_014449314.1	XP_014449311.1	XP_014449317.1	XP_014449318.1	XP_014449319.1	XP_014449320.1 ENSACAP00000006309.3 XP_008169489.1	XP_008169488.1	XP_008169494.1	XP_008169495.1	XP_008169496.1	XP_008169497.1	XP_008169490.1	XP_008169492.1	XP_008169493.1	XP_005302482.2	XP_008169498.1 ENSGALP00000014509.4 ENSP00000359803.1	ENSP00000359804.2	ENSP00000294623.4	ENSP00000402630.1 ENSPSIP00000014596.1	ENSPSIP00000014601.1 gopAga1_00011568-RB	gopAga1_00011568-RE	gopAga1_00011568-RA	gopAga1_00011568-RD	gopAga1_00011568-RC
OG0000434 XP_014461073.1	XP_014451372.1	XP_014451375.1	XP_014451374.1	XP_014451376.1 ENSACAP00000003701.3	ENSACAP00000013176.3 XP_005295605.1	XP_005295603.1	XP_005295601.1	XP_005295602.1	XP_005295600.1	XP_008166254.1	XP_005295604.1	XP_008169181.1	XP_008169182.1	XP_008169180.1	XP_008166253.1	XP_008166255.1 ENSGALP00000016069.4	ENSGALP00000010397.4 ENSP00000352780.4	ENSP00000481670.1	ENSP00000480660.1	ENSP00000478352.1	ENSP00000381098.3	ENSP00000446024.1	ENSP00000446047.1	ENSP00000439053.1 ENSPSIP00000017280.1	ENSPSIP00000017271.1	ENSPSIP00000009916.1 gopAga1_00009547-RA
OG0000435 XP_014453466.1	XP_014457018.1 ENSACAP00000010652.3 XP_005279669.2	XP_005315356.1 ENSP00000450005.1	ENSP00000448474.1	ENSP00000415708.1	ENSP00000389244.2	ENSP00000449642.1	ENSP00000447560.1	ENSP00000398764.1	ENSP00000399161.2	ENSP00000449232.1	ENSP00000446935.1	ENSP00000414296.1	ENSP00000393939.2	ENSP00000404572.1	ENSP00000414120.2	ENSP00000449518.1	ENSP00000392054.1	ENSP00000372870.4	ENSP00000448213.1	ENSP00000449039.1	ENSP00000400263.1	ENSP00000447704.1	ENSP00000448088.1	ENSP00000364712.4	ENSP00000229729.6	ENSP00000449180.1	ENSP00000444109.1	ENSP00000398901.1	ENSP00000398852.2
OG0000436 XP_014463055.1	XP_014461238.1	XP_014455715.1	XP_014454367.1	XP_014461231.1 ENSACAP00000005152.2	ENSACAP00000013134.2	ENSACAP00000007468.3	ENSACAP00000022577.1 XP_008166240.1	XP_008176451.1	XP_005291918.1	XP_005291917.1	XP_005291920.1	XP_005288471.1	XP_005288470.1	XP_005291919.1	XP_008176448.1 ENSGALP00000010443.4	ENSGALP00000035469.2	ENSGALP00000001929.4 ENSP00000358696.3	ENSP00000356000.3	ENSP00000377061.2	ENSP00000323194.4	ENSP00000352882.3 ENSPSIP00000008480.1	ENSPSIP00000019306.1	ENSPSIP00000019303.1	ENSPSIP00000012158.1 gopAga1_00005163-RA	gopAga1_00003569-RA	gopAga1_00002250-RA
OG0000437 XP_014454383.1 ENSACAP00000010615.3 XP_005314218.1	XP_008175909.1	XP_005313682.2	XP_008175761.1	XP_008176053.1	XP_005314493.2	XP_005313995.2	XP_008171680.1	XP_008175849.1	XP_008171675.1	XP_005315224.1	XP_008171678.1	XP_005314048.2	XP_008171676.1	XP_008175850.1	XP_005296122.1	XP_005296120.1	XP_008171679.1	XP_008176317.1	XP_005315343.1	XP_005315048.1	XP_005296121.1	XP_005312640.2	XP_005314975.1	XP_008175540.1	XP_008171677.1 ENSPSIP00000013086.1	ENSPSIP00000006130.1 gopAga1_00019938-RA	gopAga1_00006907-RB	gopAga1_00006907-RA
OG0000438 XP_014459581.1	XP_014454686.1	XP_014459582.1 ENSACAP00000001708.3 XP_005285514.1	XP_005285516.1	XP_005285515.1	XP_005285513.1	XP_008162551.1	XP_008162552.1	XP_008162553.1	XP_008162554.1	XP_008162556.1	XP_008162555.1 ENSGALP00000002911.3	ENSGALP00000008251.3 ENSP00000433347.1	ENSP00000354610.4	ENSP00000481588.1	ENSP00000397582.2	ENSP00000390832.1	ENSP00000481450.1	ENSP00000359096.3	ENSP00000399836.1	ENSP00000359100.4	ENSP00000330484.5	ENSP00000390219.1	ENSP00000359097.3 ENSPSIP00000007597.1	ENSPSIP00000007541.1 gopAga1_00019440-RA	gopAga1_00019441-RA	gopAga1_00015308-RA
OG0000439 XP_014456106.1 ENSACAP00000010898.2 XP_005279387.2 ENSP00000405448.2	ENSP00000388494.1	ENSP00000412056.2	ENSP00000412619.2	ENSP00000398396.2	ENSP00000416194.2	ENSP00000365829.4	ENSP00000408610.2	ENSP00000405834.2	ENSP00000403747.2	ENSP00000415046.2	ENSP00000391247.1	ENSP00000414284.2	ENSP00000412174.2	ENSP00000401788.2	ENSP00000394320.2	ENSP00000397778.2	ENSP00000404260.2	ENSP00000403833.2	ENSP00000411003.2	ENSP00000405035.1	ENSP00000409193.2	ENSP00000399295.2	ENSP00000389565.1	ENSP00000410328.2	ENSP00000408577.2	ENSP00000404312.2	ENSP00000409799.2 gopAga1_00009926-RA	gopAga1_00009926-RB
OG0000440 XP_014460663.1	XP_014460662.1 ENSACAP00000012925.3	ENSACAP00000022019.1 XP_005311573.1	XP_008161362.1	XP_008161357.1	XP_008161356.1	XP_008161363.1	XP_008161359.1	XP_008161358.1	XP_008161370.1	XP_008161368.1	XP_008161369.1	XP_008161360.1	XP_008161361.1	XP_008161367.1	XP_008161364.1	XP_008161365.1 ENSGALP00000019199.4 ENSP00000433392.1	ENSP00000316434.9	ENSP00000436791.1	ENSP00000358357.3	ENSP00000358355.3	ENSP00000358360.3	ENSP00000358363.4	ENSP00000479409.1	ENSP00000480806.1	ENSP00000462316.2 ENSPSIP00000002697.1 gopAga1_00009277-RA	gopAga1_00009276-RA
OG0000441 XP_014461664.1	XP_014464482.1	XP_014464483.1	XP_014464480.1	XP_014464481.1 ENSACAP00000002374.2	ENSACAP00000012696.2	ENSACAP00000008018.3 XP_008166072.1	XP_008175921.1	XP_008175920.1	XP_008172099.1 ENSGALP00000010021.3	ENSGALP00000037988.1	ENSGALP00000037978.2	ENSGALP00000041835.1	ENSGALP00000037439.1 ENSP00000397133.3	ENSP00000448873.1	ENSP00000419493.1	ENSP00000447433.1	ENSP00000323867.5	ENSP00000376549.2	ENSP00000419577.1	ENSP00000387386.2	ENSP00000287878.3	ENSP00000448972.1	ENSP00000436068.1	ENSP00000233944.3 ENSPSIP00000012822.1 gopAga1_00008043-RB	gopAga1_00008043-RA	gopAga1_00012851-RA
OG0000442 XP_014463738.1 ENSACAP00000010184.3 XP_005279378.1 ENSP00000373065.2	ENSP00000483875.1	ENSP00000409285.1	ENSP00000408118.1	ENSP00000373064.4	ENSP00000365602.5	ENSP00000397892.1	ENSP00000365603.5	ENSP00000259953.4	ENSP00000482593.1	ENSP00000405789.1	ENSP00000397755.1	ENSP00000482740.1	ENSP00000407049.1	ENSP00000389894.1	ENSP00000392502.2	ENSP00000412991.1	ENSP00000414927.1	ENSP00000478812.1	ENSP00000407779.1	ENSP00000389958.2	ENSP00000481407.1	ENSP00000398752.1	ENSP00000399560.2	ENSP00000394862.1	ENSP00000481406.1	ENSP00000407111.2	ENSP00000394788.2 ENSPSIP00000013925.1 gopAga1_00012517-RA
OG0000443 ENSACAP00000022032.1	ENSACAP00000021893.1	ENSACAP00000023349.1	ENSACAP00000022241.1	ENSACAP00000022673.1	ENSACAP00000023370.1	ENSACAP00000022660.1	ENSACAP00000023202.1	ENSACAP00000022715.1	ENSACAP00000022401.1	ENSACAP00000022209.1	ENSACAP00000022026.1	ENSACAP00000022799.1	ENSACAP00000022262.1	ENSACAP00000022565.1	ENSACAP00000022752.1	ENSACAP00000022841.1	ENSACAP00000023481.1	ENSACAP00000023061.1	ENSACAP00000022827.1	ENSACAP00000022819.1	ENSACAP00000023102.1	ENSACAP00000022657.1	ENSACAP00000022798.1	ENSACAP00000022822.1	ENSACAP00000022053.1	ENSACAP00000023214.1	ENSACAP00000023113.1	ENSACAP00000023011.1	ENSACAP00000023203.1	ENSACAP00000022269.1	ENSACAP00000022851.1 XP_008176405.1
OG0000444 ENSACAP00000018107.1	ENSACAP00000007340.2 XP_008165117.1 ENSGALP00000042113.1	ENSGALP00000023519.4 ENSP00000457575.1	ENSP00000369146.3	ENSP00000290705.8	ENSP00000478425.1	ENSP00000219162.3	ENSP00000456675.1	ENSP00000391397.2	ENSP00000456835.1	ENSP00000457516.1	ENSP00000456804.1	ENSP00000334872.6	ENSP00000476141.1	ENSP00000456462.1	ENSP00000245185.5	ENSP00000377995.4	ENSP00000200691.4	ENSP00000475537.1	ENSP00000475791.1	ENSP00000456056.1	ENSP00000334998.2	ENSP00000457164.1	ENSP00000330587.4	ENSP00000369139.3	ENSP00000307706.5	ENSP00000328137.6 ENSPSIP00000014253.1	ENSPSIP00000015847.1	ENSPSIP00000014241.1
OG0000445 XP_006258691.1	XP_006258692.2	XP_006263268.1	XP_014457453.1	XP_014457452.1	XP_014452947.1 ENSACAP00000022766.1 XP_005305802.1	XP_005294429.1	XP_008172166.1	XP_005305800.1 ENSGALP00000034078.2	ENSGALP00000011811.4	ENSGALP00000043353.1 ENSP00000425581.1	ENSP00000426976.2	ENSP00000455435.1	ENSP00000421064.1	ENSP00000219302.3	ENSP00000426901.1	ENSP00000376886.1	ENSP00000429318.1	ENSP00000013034.3	ENSP00000376892.3	ENSP00000337060.3 ENSPSIP00000003638.1	ENSPSIP00000015677.1 gopAga1_00015045-RB	gopAga1_00015044-RB	gopAga1_00006367-RA	gopAga1_00015045-RA	gopAga1_00015044-RA
OG0000446 XP_014458278.1	XP_006261137.1	XP_006261135.1 ENSACAP00000016769.3	ENSACAP00000004483.3 XP_005287840.1	XP_005287841.1	XP_005287842.1	XP_005287843.1	XP_005287838.1	XP_005287839.1	XP_005314508.1	XP_008170278.1	XP_005282602.1 ENSGALP00000008288.3	ENSGALP00000026659.4 ENSP00000388738.2	ENSP00000399902.1	ENSP00000397155.1	ENSP00000401705.1	ENSP00000379891.2	ENSP00000328789.2	ENSP00000336666.5	ENSP00000410780.1	ENSP00000389474.1	ENSP00000444957.2	ENSP00000403498.1	ENSP00000369645.1 ENSPSIP00000010504.1	ENSPSIP00000010153.1	ENSPSIP00000009073.1 gopAga1_00019202-RA
OG0000447 XP_014459226.1	XP_014459227.1	XP_006262796.2	XP_006262797.2	XP_006262798.2	XP_014467011.1	XP_014459602.1	XP_014459985.1 ENSACAP00000003337.2	ENSACAP00000004346.2	ENSACAP00000022100.1	ENSACAP00000007585.2	ENSACAP00000002879.3 XP_008167306.1	XP_008173811.1	XP_005285506.1	XP_005285508.1	XP_005285507.1	XP_005285509.1 ENSGALP00000008307.4	ENSGALP00000004011.4 ENSP00000481360.1	ENSP00000360882.3	ENSP00000351163.2	ENSP00000426533.1	ENSP00000359114.3	ENSP00000264828.3	ENSP00000302551.6 ENSPSIP00000008751.1	ENSPSIP00000018407.1 gopAga1_00008445-RA	gopAga1_00018861-RA
OG0000448 XP_006263570.1	XP_014461027.1	XP_014461026.1 ENSACAP00000007076.3	ENSACAP00000011490.2	ENSACAP00000023185.1 XP_005280485.1	XP_005280486.1	XP_005280487.1	XP_005280484.1	XP_005292756.1	XP_005292757.1	XP_005292754.1	XP_005292755.1	XP_005292752.1	XP_005292753.1	XP_005292758.1 ENSGALP00000024055.4	ENSGALP00000020132.4 ENSP00000420167.1	ENSP00000419627.1	ENSP00000420287.1	ENSP00000420666.1	ENSP00000273666.6	ENSP00000356451.3	ENSP00000420019.1	ENSP00000321826.6	ENSP00000356450.3 ENSPSIP00000014449.1	ENSPSIP00000014305.1 gopAga1_00017530-RA	gopAga1_00003524-RA
OG0000449 XP_014464604.1	XP_006263886.2	XP_014464599.1	XP_014450885.1	XP_014464594.1	XP_006265753.2	XP_014450884.1 ENSACAP00000009809.3	ENSACAP00000000034.3	ENSACAP00000020731.2 XP_008162435.1	XP_008162434.1	XP_008162433.1	XP_008162432.1	XP_005279967.1	XP_008162491.1	XP_008175728.1 ENSGALP00000007775.3	ENSGALP00000021166.3	ENSGALP00000021163.2 ENSP00000352702.4	ENSP00000407104.2	ENSP00000339260.4	ENSP00000254488.2	ENSP00000380464.2	ENSP00000444268.1	ENSP00000399136.2 ENSPSIP00000006568.1	ENSPSIP00000020502.1	ENSPSIP00000004564.1 gopAga1_00017769-RA	gopAga1_00013027-RA
OG0000450 XP_014455256.1	XP_006263924.2	XP_014464164.1	XP_014464165.1	XP_006273789.2	XP_014464163.1 ENSACAP00000018406.2	ENSACAP00000003139.2 XP_005300952.1	XP_005300951.1	XP_008161396.1	XP_005304332.1 ENSGALP00000042481.1	ENSGALP00000020584.4	ENSGALP00000008417.4 ENSP00000396951.1	ENSP00000420572.1	ENSP00000359142.3	ENSP00000336739.3	ENSP00000417897.1	ENSP00000489217.1	ENSP00000354916.6	ENSP00000364390.3	ENSP00000364388.3	ENSP00000388501.1	ENSP00000364389.1	ENSP00000413940.2 ENSPSIP00000011814.1	ENSPSIP00000014618.1	ENSPSIP00000014625.1 gopAga1_00003014-RA	gopAga1_00006297-RA
OG0000451 XP_014455818.1	XP_014455951.1	XP_014455952.1	XP_014455794.1	XP_014455793.1	XP_006277747.1	XP_006263990.1	XP_014455815.1	XP_014455817.1	XP_014455816.1 ENSACAP00000008159.3	ENSACAP00000021625.1 XP_005283294.1	XP_008165655.1 ENSGALP00000027011.3	ENSGALP00000027012.2	ENSGALP00000042740.1 ENSP00000487012.1	ENSP00000386923.1	ENSP00000311320.4	ENSP00000386381.1	ENSP00000390357.1	ENSP00000386939.1	ENSP00000327533.2	ENSP00000405439.1 ENSPSIP00000012951.1	ENSPSIP00000012935.1	ENSPSIP00000012944.1	ENSPSIP00000016151.1 gopAga1_00018627-RA	gopAga1_00018628-RA	gopAga1_00010585-RA
OG0000452 XP_014464619.1	XP_014464621.1	XP_014464620.1	XP_014464613.1	XP_014464614.1	XP_014464615.1	XP_014464616.1	XP_014464617.1	XP_006264877.2	XP_006264881.2 ENSACAP00000007521.3 XP_005308303.1	XP_005308298.1	XP_005308297.1	XP_005308296.1	XP_005308305.1	XP_005308306.1	XP_005308307.1	XP_005308295.1	XP_005308301.1	XP_005308302.1	XP_005308304.1	XP_005308308.1	XP_005308309.1	XP_005308300.1	XP_005308299.1 ENSGALP00000000818.4 ENSP00000402046.1	ENSP00000272203.2 ENSPSIP00000006937.1 gopAga1_00009186-RB	gopAga1_00009186-RA
OG0000453 XP_014455011.1	XP_006266378.1	XP_014449292.1 ENSACAP00000010337.3	ENSACAP00000005768.3 XP_005286131.1	XP_008166038.1	XP_008166043.1	XP_008166040.1	XP_008166042.1	XP_008162601.1	XP_008162602.1	XP_008166041.1	XP_008166044.1	XP_008166039.1 ENSGALP00000019155.5	ENSGALP00000021147.4 ENSP00000339299.4	ENSP00000353109.3	ENSP00000240874.3	ENSP00000291478.4	ENSP00000346122.4	ENSP00000426342.2	ENSP00000421555.2	ENSP00000445592.1	ENSP00000418611.1 ENSPSIP00000016278.1	ENSPSIP00000004011.1	ENSPSIP00000016262.1 gopAga1_00004964-RA	gopAga1_00004966-RA	gopAga1_00009416-RA
OG0000454 XP_014465442.1	XP_006268191.2	XP_014454277.1	XP_014454275.1	XP_014454274.1	XP_014454273.1	XP_014454272.1	XP_014454276.1 ENSACAP00000015850.3	ENSACAP00000022406.1 XP_008161459.1	XP_005285940.1	XP_008177906.1	XP_005306377.1	XP_008166448.1	XP_005285939.1	XP_005285941.1	XP_008177908.1	XP_005307965.1 ENSGALP00000015963.4	ENSGALP00000019298.4 ENSP00000261461.2	ENSP00000442866.1	ENSP00000337641.3	ENSP00000452396.1	ENSP00000404632.2	ENSP00000164133.2 ENSPSIP00000012312.1	ENSPSIP00000015040.1	ENSPSIP00000006341.1 gopAga1_00013316-RA	gopAga1_00012689-RA
OG0000455 XP_006270822.1	XP_014450574.1	XP_014450575.1	XP_006269755.1	XP_006269754.2	XP_006269753.1 XP_005285974.1	XP_005308105.1	XP_005308104.1	XP_008177892.1	XP_008177893.1	XP_005308103.1	XP_005285975.1	XP_005308102.1	XP_005305623.1 ENSGALP00000019568.2	ENSGALP00000013180.3	ENSGALP00000039434.1 ENSP00000322147.7	ENSP00000437971.1	ENSP00000378107.2	ENSP00000440874.1	ENSP00000340716.4	ENSP00000378525.1	ENSP00000348279.3	ENSP00000397808.1	ENSP00000440960.1	ENSP00000384825.2	ENSP00000350365.4	ENSP00000489133.1	ENSP00000340903.2 gopAga1_00004132-RA
OG0000456 XP_006271812.1	XP_006269802.1	XP_014462144.1 ENSACAP00000023226.1	ENSACAP00000008459.3	ENSACAP00000000732.3 XP_005282719.1	XP_005303021.1	XP_005282720.1	XP_005282721.1 ENSGALP00000012126.4	ENSGALP00000022345.3 ENSP00000360141.3	ENSP00000467345.1	ENSP00000269162.4	ENSP00000439023.1	ENSP00000360143.4	ENSP00000408489.2	ENSP00000467709.1	ENSP00000473600.1	ENSP00000334051.5	ENSP00000412424.1	ENSP00000360126.3	ENSP00000346328.7	ENSP00000360136.3	ENSP00000474219.1	ENSP00000265620.7	ENSP00000304472.11 ENSPSIP00000013894.1	ENSPSIP00000004927.1 gopAga1_00002568-RA	gopAga1_00004182-RA
OG0000457 XP_014466282.1	XP_014466283.1	XP_014466281.1	XP_006270794.1	XP_006270796.1	XP_006270800.1	XP_006270799.1	XP_006270798.1	XP_006270797.1 XP_008171043.1	XP_008171046.1	XP_008171047.1	XP_008171044.1	XP_008171045.1	XP_005306789.1 ENSGALP00000005086.1 ENSP00000481589.1	ENSP00000459138.1	ENSP00000459533.1	ENSP00000340118.5	ENSP00000397958.2	ENSP00000460133.1	ENSP00000483114.1	ENSP00000458836.1	ENSP00000461667.1	ENSP00000461813.1	ENSP00000460743.1	ENSP00000458871.1	ENSP00000458981.1 ENSPSIP00000019553.1 gopAga1_00010297-RB	gopAga1_00010297-RA
OG0000458 XP_014464679.1	XP_014464680.1	XP_014464681.1	XP_014464682.1	XP_006271619.1 ENSACAP00000017077.3 XP_008160837.1	XP_008160838.1	XP_008160839.1	XP_008160841.1	XP_008160840.1	XP_008160842.1	XP_008160836.1 ENSGALP00000042673.1	ENSGALP00000000840.4 ENSP00000485811.1	ENSP00000479863.1	ENSP00000461484.1	ENSP00000486009.1	ENSP00000487644.1	ENSP00000482074.1	ENSP00000487763.1	ENSP00000461299.1	ENSP00000486326.1	ENSP00000484212.1	ENSP00000262419.6	ENSP00000387393.2	ENSP00000485807.1	ENSP00000480995.1	ENSP00000461812.1 ENSPSIP00000009964.1 gopAga1_00004917-RA
OG0000459 XP_014462395.1	XP_006272458.1 ENSACAP00000005320.2	ENSACAP00000022576.1	ENSACAP00000022316.1	ENSACAP00000021655.1	ENSACAP00000005054.2	ENSACAP00000022603.1	ENSACAP00000005069.3	ENSACAP00000005347.2 XP_008175786.1	XP_008175038.1	XP_008175751.1	XP_005315034.1	XP_005315023.1	XP_005314246.1	XP_005313955.1 ENSGALP00000021655.4 ENSP00000483803.1	ENSP00000479452.1	ENSP00000369494.1	ENSP00000315167.4	ENSP00000400581.2	ENSP00000314879.3	ENSP00000458749.1	ENSP00000460332.2	ENSP00000369530.4	ENSP00000369520.2 ENSPSIP00000008490.1 gopAga1_00017668-RA	gopAga1_00016772-RA	gopAga1_00016771-RA
OG0000460 XP_014456100.1	XP_006276025.1 ENSACAP00000015454.3	ENSACAP00000023258.1	ENSACAP00000022404.1	ENSACAP00000011652.3 XP_005313122.1	XP_005312921.1	XP_008174923.1	XP_008174920.1	XP_008174921.1	XP_005312299.1 ENSGALP00000000108.4 ENSP00000342557.2	ENSP00000472786.1	ENSP00000469467.1	ENSP00000375702.1	ENSP00000469841.1	ENSP00000470120.1	ENSP00000472474.1	ENSP00000471950.1 ENSPSIP00000017729.1	ENSPSIP00000018851.1	ENSPSIP00000006102.1	ENSPSIP00000018138.1	ENSPSIP00000017026.1 gopAga1_00015608-RA	gopAga1_00015607-RA	gopAga1_00018601-RA	gopAga1_00018602-RA	gopAga1_00015606-RA	gopAga1_00016365-RA
OG0000461 XP_014457991.1	XP_006276703.1	XP_014466497.1	XP_014457590.1	XP_006276716.1 ENSACAP00000005162.3	ENSACAP00000003013.3	ENSACAP00000001266.3 XP_005278773.1	XP_005278772.1	XP_005302348.1	XP_005302349.1 ENSGALP00000019020.3	ENSGALP00000013353.3 ENSP00000256997.3	ENSP00000432439.1	ENSP00000432205.1	ENSP00000323036.8	ENSP00000417744.1	ENSP00000270593.1	ENSP00000418366.1	ENSP00000337471.5 ENSPSIP00000013790.1	ENSPSIP00000013874.1	ENSPSIP00000010523.1 gopAga1_00001591-RD	gopAga1_00001591-RE	gopAga1_00001591-RC	gopAga1_00001591-RB	gopAga1_00001591-RA	gopAga1_00004935-RA	gopAga1_00004933-RA
OG0000462 XP_014456142.1	XP_014456180.1	XP_014456181.1	XP_006278542.1	XP_006278543.1 ENSACAP00000020451.2	ENSACAP00000021080.2	ENSACAP00000012367.3	ENSACAP00000012369.2 XP_008176900.1	XP_005300411.1	XP_008176898.1	XP_005300432.1	XP_005300412.1	XP_005300410.1 ENSGALP00000027713.4	ENSGALP00000027716.3	ENSGALP00000041145.1	ENSGALP00000027709.4 ENSP00000401004.2	ENSP00000236826.3	ENSP00000279441.4	ENSP00000260229.4	ENSP00000322788.6	ENSP00000299855.5 ENSPSIP00000018180.1	ENSPSIP00000018056.1	ENSPSIP00000017950.1 gopAga1_00017527-RA	gopAga1_00016809-RA	gopAga1_00017525-RA	gopAga1_00019004-RA
OG0000463 XP_014450191.1	XP_014450104.1	XP_014450103.1	XP_014450102.1	XP_014450101.1 ENSACAP00000017043.3 XP_008171537.1	XP_005307749.1	XP_005307751.1	XP_008171538.1	XP_005307750.1	XP_008171541.1	XP_008171540.1	XP_008171536.1	XP_008171539.1 ENSGALP00000015480.4 ENSP00000425062.1	ENSP00000358001.1	ENSP00000357997.1	ENSP00000353763.3	ENSP00000334280.2	ENSP00000357996.1	ENSP00000422815.1	ENSP00000357995.1	ENSP00000422725.1	ENSP00000350701.1	ENSP00000260733.3	ENSP00000420967.1 ENSPSIP00000011512.1	ENSPSIP00000011507.1 gopAga1_00008868-RA	gopAga1_00015212-RA
OG0000464 XP_014458436.1	XP_014450211.1	XP_014450204.1	XP_014460144.1	XP_014450209.1	XP_014450207.1 ENSACAP00000008133.3	ENSACAP00000003589.3 XP_005300684.1	XP_008177277.1	XP_008165751.1	XP_008168704.1	XP_005280799.1 ENSGALP00000013987.4	ENSGALP00000024116.4 ENSP00000421097.1	ENSP00000354451.2	ENSP00000436603.1	ENSP00000453181.1	ENSP00000268182.5	ENSP00000488618.1	ENSP00000379535.3	ENSP00000426027.1	ENSP00000274364.6	ENSP00000442313.2 ENSPSIP00000014164.1	ENSPSIP00000012062.1	ENSPSIP00000013686.1 gopAga1_00009917-RA	gopAga1_00009916-RA	gopAga1_00001750-RA	gopAga1_00002490-RA
OG0000465 XP_014450397.1 ENSACAP00000005972.3 XP_005299129.1	XP_005299130.1	XP_005299131.1 ENSGALP00000022759.3 ENSP00000425968.1	ENSP00000421582.1	ENSP00000416943.2	ENSP00000423126.2	ENSP00000420917.1	ENSP00000424252.1	ENSP00000423845.1	ENSP00000423002.1	ENSP00000422171.1	ENSP00000399656.2	ENSP00000425633.1	ENSP00000420881.1	ENSP00000427363.1	ENSP00000426902.1	ENSP00000426386.1	ENSP00000379725.2	ENSP00000264312.7	ENSP00000423909.2	ENSP00000425356.1	ENSP00000370882.3	ENSP00000427389.1	ENSP00000423381.1	ENSP00000424041.1	ENSP00000421572.1 ENSPSIP00000018223.1 gopAga1_00004575-RA
OG0000466 XP_014452684.1	XP_014458760.1	XP_014464652.1	XP_014450776.1	XP_014466021.1 ENSACAP00000013922.1	ENSACAP00000016757.3	ENSACAP00000017658.2 XP_005293639.2	XP_005314581.1	XP_008172063.1	XP_005289789.1	XP_008174431.1	XP_005308414.1	XP_005308413.1	XP_008172062.1 ENSGALP00000000498.4	ENSGALP00000010079.4	ENSGALP00000018334.4 ENSP00000225823.2	ENSP00000352934.6	ENSP00000450247.1	ENSP00000400228.2	ENSP00000228468.4	ENSP00000402896.3	ENSP00000350786.4	ENSP00000326627.3 ENSPSIP00000014604.1	ENSPSIP00000004482.1	ENSPSIP00000014614.1 gopAga1_00019951-RA	gopAga1_00016973-RA
OG0000467 XP_014463971.1	XP_014463922.1	XP_014452182.1 ENSACAP00000017308.3	ENSACAP00000006011.2	ENSACAP00000006311.2 XP_005289224.1	XP_008163078.1	XP_005288930.2	XP_005297719.1	XP_005297718.2 ENSGALP00000008679.4	ENSGALP00000039457.2	ENSGALP00000038497.2	ENSGALP00000038496.2	ENSGALP00000002089.4 ENSP00000462696.1	ENSP00000284110.1	ENSP00000293937.3	ENSP00000416741.3	ENSP00000354213.2	ENSP00000436078.1	ENSP00000330606.5	ENSP00000261374.3 ENSPSIP00000001335.1	ENSPSIP00000018392.1	ENSPSIP00000000650.1 gopAga1_00014476-RA	gopAga1_00009539-RA	gopAga1_00011375-RA	gopAga1_00005819-RA	gopAga1_00008531-RA
OG0000468 XP_014463970.1	XP_014453192.1	XP_014457221.1	XP_014457222.1 XP_005300612.1	XP_008176476.1	XP_008177274.1	XP_005311297.2	XP_008177280.1	XP_005311308.1 ENSGALP00000010056.3 ENSP00000416592.2	ENSP00000357027.3	ENSP00000357033.3	ENSP00000473590.1	ENSP00000357072.3	ENSP00000357038.3	ENSP00000357036.3	ENSP00000357021.3	ENSP00000312367.4	ENSP00000357022.3	ENSP00000352281.4	ENSP00000483774.1	ENSP00000403294.2	ENSP00000405605.2	ENSP00000409965.2 ENSPSIP00000013127.1	ENSPSIP00000013117.1	ENSPSIP00000009977.1	ENSPSIP00000004231.1 gopAga1_00011409-RA	gopAga1_00019239-RA
OG0000469 XP_014453921.1	XP_014453920.1	XP_014453919.1	XP_014453918.1	XP_014453925.1	XP_014453924.1	XP_014453923.1	XP_014453922.1	XP_014453927.1	XP_014453926.1	XP_014453930.1	XP_014453916.1	XP_014453917.1	XP_014453931.1	XP_014453932.1	XP_014453929.1	XP_014453928.1 ENSACAP00000014806.3 XP_008161897.1 ENSGALP00000004924.5 ENSP00000402808.1	ENSP00000384018.1	ENSP00000384202.1	ENSP00000403034.1	ENSP00000348551.4	ENSP00000443689.1	ENSP00000405367.1	ENSP00000385618.3	ENSP00000400281.2 ENSPSIP00000003311.1 gopAga1_00001001-RA	gopAga1_00001002-RA
OG0000470 XP_014456796.1	XP_014455857.1	XP_014456802.1 ENSACAP00000009332.2	ENSACAP00000006192.3 XP_008171425.1	XP_008171426.1	XP_008171427.1	XP_005307650.1	XP_005307649.1	XP_005307653.1	XP_005307652.1	XP_008177227.1	XP_005301099.1 ENSGALP00000010376.2	ENSGALP00000027173.3 ENSP00000359654.1	ENSP00000359656.1	ENSP00000250617.6	ENSP00000397068.2	ENSP00000364875.1	ENSP00000418067.1	ENSP00000364888.4	ENSP00000218789.5	ENSP00000417596.1	ENSP00000325994.5	ENSP00000364891.2	ENSP00000364893.2 ENSPSIP00000012027.1	ENSPSIP00000009203.1 gopAga1_00005897-RA	gopAga1_00015599-RA
OG0000471 XP_014455942.1	XP_014456740.1	XP_014456727.1	XP_014456746.1	XP_014456735.1 ENSACAP00000005983.3	ENSACAP00000006546.3 XP_005307657.1	XP_005294662.1	XP_008173867.1	XP_005294664.1	XP_005294663.1	XP_005294667.1	XP_005294665.1	XP_005294669.1	XP_005294668.1 ENSGALP00000010676.3	ENSGALP00000027136.4 ENSP00000332756.3	ENSP00000359588.1	ENSP00000420387.1	ENSP00000355165.2	ENSP00000364781.2	ENSP00000396374.1	ENSP00000364796.3 ENSPSIP00000014019.1	ENSPSIP00000019401.1	ENSPSIP00000019417.1 gopAga1_00009251-RA	gopAga1_00009251-RB	gopAga1_00009251-RC	gopAga1_00006094-RA
OG0000472 XP_014466680.1	XP_014466681.1	XP_014466682.1	XP_014466683.1 ENSACAP00000017616.3 XP_005301845.1	XP_005301839.1	XP_005301841.1	XP_005301840.1	XP_005301847.1	XP_008169121.1	XP_005301842.1 ENSGALP00000026095.3 ENSP00000443078.2	ENSP00000372355.5	ENSP00000483595.1	ENSP00000398929.1	ENSP00000437405.2	ENSP00000441943.2	ENSP00000445274.2	ENSP00000439922.2	ENSP00000372352.4	ENSP00000355420.4	ENSP00000484698.1	ENSP00000485013.1	ENSP00000483735.1	ENSP00000367203.4	ENSP00000405910.1	ENSP00000442047.2	ENSP00000328939.4 ENSPSIP00000013275.1 gopAga1_00002585-RA
OG0000473 XP_006274058.2	XP_014466851.1	XP_006257868.2 ENSACAP00000009308.2	ENSACAP00000000730.3	ENSACAP00000003391.3 XP_005281962.1	XP_005300058.1	XP_005291528.1 ENSGALP00000005930.3	ENSGALP00000042547.1	ENSGALP00000025792.4	ENSGALP00000040626.1	ENSGALP00000020762.4	ENSGALP00000043249.1 ENSP00000357665.4	ENSP00000357668.4	ENSP00000257527.4	ENSP00000428654.1	ENSP00000322550.5	ENSP00000369190.4	ENSP00000348912.2	ENSP00000431027.1 ENSPSIP00000006721.1	ENSPSIP00000006706.1	ENSPSIP00000004335.1	ENSPSIP00000004416.1 gopAga1_00000212-RB	gopAga1_00012819-RA	gopAga1_00000212-RA	gopAga1_00013043-RA
OG0000474 XP_006275546.1	XP_006258959.1	XP_014453022.1	XP_006277668.1	XP_006277669.1	XP_006277671.1	XP_006277670.1 ENSACAP00000018799.1	ENSACAP00000017791.2 XP_005287825.1	XP_005285729.1 ENSGALP00000040654.1	ENSGALP00000028782.3 ENSP00000456121.1	ENSP00000284856.3	ENSP00000457524.1	ENSP00000289373.4	ENSP00000455371.1	ENSP00000457057.1	ENSP00000455771.1	ENSP00000484052.1	ENSP00000472749.1	ENSP00000370010.1	ENSP00000370009.1	ENSP00000370007.1	ENSP00000233143.4	ENSP00000414376.2 ENSPSIP00000004094.1	ENSPSIP00000011603.1 gopAga1_00012343-RA	gopAga1_00017165-RA
OG0000475 XP_014451302.1	XP_006259231.1 ENSACAP00000007488.2	ENSACAP00000008081.2 XP_005308272.1	XP_005308271.1 ENSGALP00000038118.2 ENSP00000458794.1	ENSP00000262482.6	ENSP00000466753.1	ENSP00000459324.1	ENSP00000460190.1	ENSP00000458189.1	ENSP00000419069.1	ENSP00000460024.1	ENSP00000420510.1	ENSP00000376628.3	ENSP00000341361.3	ENSP00000417655.1	ENSP00000420667.1	ENSP00000355268.6	ENSP00000417294.1	ENSP00000420124.1	ENSP00000418308.1	ENSP00000418863.3 ENSPSIP00000005740.1	ENSPSIP00000004328.1	ENSPSIP00000004324.1 gopAga1_00019871-RA	gopAga1_00009012-RA	gopAga1_00009011-RA
OG0000476 XP_014460953.1	XP_006259385.2	XP_014463029.1	XP_006259384.1	XP_014463028.1	XP_014463026.1	XP_014463027.1 ENSACAP00000014111.3	ENSACAP00000011987.3 XP_005281374.1	XP_005281376.1	XP_005281375.1	XP_005281373.1	XP_008173878.1	XP_008173876.1	XP_008173877.1 ENSGALP00000012914.4	ENSGALP00000000438.4 ENSP00000358814.5	ENSP00000413639.2	ENSP00000377238.4	ENSP00000352092.3	ENSP00000419346.1	ENSP00000420801.1	ENSP00000420459.1	ENSP00000315931.3 ENSPSIP00000009685.1	ENSPSIP00000009699.1	ENSPSIP00000007081.1 gopAga1_00013147-RA	gopAga1_00013990-RA
OG0000477 XP_006260548.1	XP_006260547.1	XP_006260549.1	XP_006260544.1	XP_006260546.1	XP_006260545.1	XP_014466665.1	XP_014466664.1 ENSACAP00000002822.2 XP_008178075.1	XP_008178077.1	XP_008178076.1	XP_008178079.1	XP_008178078.1 ENSGALP00000026036.4 ENSP00000335242.4	ENSP00000381283.3	ENSP00000381285.3	ENSP00000381280.3	ENSP00000344730.3	ENSP00000328699.6	ENSP00000369685.2	ENSP00000381281.3	ENSP00000335365.6	ENSP00000291539.6	ENSP00000381287.3	ENSP00000381289.3	ENSP00000381291.3 ENSPSIP00000017119.1	ENSPSIP00000017114.1 gopAga1_00007541-RA
OG0000478 XP_006272989.2	XP_006272988.1	XP_006262018.1	XP_006262019.1	XP_014451530.1	XP_014451529.1	XP_014451528.1	XP_014459287.1	XP_014459286.1	XP_014459285.1	XP_006262017.1	XP_014459288.1 ENSACAP00000007838.2	ENSACAP00000021906.1 XP_008167307.1	XP_005293288.1	XP_005293289.1	XP_005291910.1	XP_005283450.1 ENSGALP00000005377.4	ENSGALP00000004130.4 ENSP00000482458.1	ENSP00000435434.1	ENSP00000352900.5	ENSP00000419692.1 ENSPSIP00000013390.1	ENSPSIP00000013401.1	ENSPSIP00000005268.1 gopAga1_00019536-RA	gopAga1_00001561-RA	gopAga1_00004837-RA
OG0000479 XP_006262220.1	XP_006262221.1	XP_006262219.1 ENSACAP00000002667.3 XP_008164607.1	XP_008164605.1	XP_008164604.1	XP_008164603.1	XP_008164602.1	XP_008164601.1	XP_008164600.1	XP_008164609.1	XP_008164608.1	XP_005309518.1	XP_005309519.1	XP_005309524.1	XP_005309523.1 ENSGALP00000010462.4 ENSP00000427782.1	ENSP00000427968.1	ENSP00000378469.1	ENSP00000430179.1	ENSP00000429547.1	ENSP00000367822.4	ENSP00000340347.5	ENSP00000378472.1	ENSP00000429696.1	ENSP00000430617.1 ENSPSIP00000005399.1 gopAga1_00006597-RA	gopAga1_00006597-RB
OG0000480 XP_006278974.2	XP_014458386.1	XP_006263379.1	XP_014463852.1	XP_006265594.1 ENSACAP00000004686.3	ENSACAP00000004779.2 XP_005301149.1	XP_005303326.1	XP_005287215.1	XP_005287214.1	XP_008177189.1	XP_005301150.1	XP_005301148.1 ENSGALP00000027391.2	ENSGALP00000004164.2	ENSGALP00000009526.2 ENSP00000387890.2	ENSP00000418700.1	ENSP00000336831.3	ENSP00000289290.4	ENSP00000315757.2	ENSP00000348163.3	ENSP00000381581.1	ENSP00000445339.2	ENSP00000398945.3 ENSPSIP00000019924.1	ENSPSIP00000018059.1	ENSPSIP00000010942.1 gopAga1_00007058-RA	gopAga1_00003953-RA
OG0000481 XP_014453069.1	XP_006269738.1	XP_006269739.1	XP_006263458.1 ENSACAP00000013163.2	ENSACAP00000006888.2 XP_008169445.1	XP_008168784.1	XP_005302902.1	XP_008168783.1	XP_005300676.1	XP_005300675.1	XP_005300677.1 ENSGALP00000022938.3	ENSGALP00000041179.1	ENSGALP00000011819.2 ENSP00000421524.1	ENSP00000424625.1	ENSP00000423485.1	ENSP00000423674.1	ENSP00000424275.1	ENSP00000311876.6	ENSP00000423494.1	ENSP00000427423.1	ENSP00000424061.1	ENSP00000425868.1	ENSP00000295448.3 ENSPSIP00000015786.1	ENSPSIP00000005501.1 gopAga1_00016449-RA	gopAga1_00005071-RA
OG0000482 XP_006263706.1	XP_006263710.1	XP_006263709.1	XP_006263708.1	XP_006263712.1 ENSACAP00000016752.3 XP_008175025.1	XP_008175030.1	XP_008175035.1	XP_008175039.1	XP_008175040.1	XP_008175054.1	XP_008175044.1 ENSGALP00000022545.4 ENSP00000434826.1	ENSP00000436216.1	ENSP00000435441.1	ENSP00000376159.2	ENSP00000435210.1	ENSP00000433505.1	ENSP00000436142.1	ENSP00000431734.1	ENSP00000229446.5	ENSP00000487249.1 ENSPSIP00000007872.1 gopAga1_00012462-RC	gopAga1_00012462-RD	gopAga1_00012462-RF	gopAga1_00012462-RA	gopAga1_00012462-RB	gopAga1_00012462-RE
OG0000483 XP_014452676.1	XP_014452675.1	XP_006264011.1	XP_006264009.1	XP_006264010.1	XP_006264007.1	XP_006264008.1	XP_014460089.1	XP_014460088.1	XP_014460091.1	XP_014460092.1 ENSACAP00000020198.1	ENSACAP00000008227.2	ENSACAP00000009324.3 XP_005281812.1	XP_005281810.1	XP_005281811.1	XP_008170003.1	XP_008170002.1	XP_008170004.1 ENSGALP00000007541.3	ENSGALP00000010654.3 ENSP00000363758.1	ENSP00000363761.3	ENSP00000383053.3	ENSP00000363763.3	ENSP00000381097.3	ENSP00000419574.1 ENSPSIP00000004568.1	ENSPSIP00000002077.1 gopAga1_00011785-RA
OG0000484 XP_014457836.1	XP_014457837.1	XP_014457839.1	XP_014457838.1	XP_014457835.1	XP_006265451.1	XP_006265450.1	XP_006265449.2 ENSACAP00000004688.3 XP_005290857.1	XP_005290855.1	XP_005290853.1	XP_008177137.1	XP_005307914.1 ENSGALP00000023127.4	ENSGALP00000008684.4	ENSGALP00000023126.3	ENSGALP00000029867.3 ENSP00000351184.2	ENSP00000441959.1	ENSP00000380311.2	ENSP00000354588.3	ENSP00000352926.2	ENSP00000435393.1	ENSP00000435233.1 ENSPSIP00000020120.1	ENSPSIP00000019542.1	ENSPSIP00000019539.1 gopAga1_00002792-RA	gopAga1_00001065-RA	gopAga1_00001064-RA
OG0000485 XP_006265600.1	XP_014450847.1 ENSACAP00000009033.2 XP_005315530.1	XP_008176278.1	XP_005315395.2	XP_008171121.1 ENSGALP00000028664.3	ENSGALP00000022266.4 ENSP00000202917.5	ENSP00000342278.4	ENSP00000376362.2	ENSP00000448790.1	ENSP00000448001.1	ENSP00000388001.2	ENSP00000415721.2	ENSP00000447323.1	ENSP00000448348.1	ENSP00000257570.4	ENSP00000479512.1	ENSP00000483679.1	ENSP00000448388.1	ENSP00000341125.5	ENSP00000228928.7 ENSPSIP00000005672.1	ENSPSIP00000009598.1 gopAga1_00007663-RA	gopAga1_00007663-RB	gopAga1_00013428-RA	gopAga1_00007663-RC	gopAga1_00013427-RA
OG0000486 XP_006265799.1	XP_014465233.1	XP_014467060.1	XP_006265796.1	XP_006265798.1	XP_006265797.1 ENSACAP00000017937.3	ENSACAP00000008361.3	ENSACAP00000008002.3 XP_005280453.2	XP_005305252.1	XP_008176791.1 ENSGALP00000022339.4	ENSGALP00000042840.1 ENSP00000422927.1	ENSP00000404416.2	ENSP00000426507.1	ENSP00000424680.1	ENSP00000350509.4	ENSP00000485875.1	ENSP00000473952.1	ENSP00000405048.1	ENSP00000356573.4	ENSP00000340090.6	ENSP00000229583.5	ENSP00000368726.2	ENSP00000275235.4	ENSP00000407817.1 ENSPSIP00000009880.1	ENSPSIP00000004871.1 gopAga1_00014011-RA
OG0000487 XP_006270453.1	XP_014463256.1	XP_014463255.1	XP_006276864.2	XP_006266073.1 ENSACAP00000023458.1	ENSACAP00000010415.3	ENSACAP00000014298.3	ENSACAP00000009578.2	ENSACAP00000005543.3 XP_008164708.1	XP_008173167.1	XP_005285722.1	XP_005287867.1	XP_005287868.1 ENSGALP00000007885.3	ENSGALP00000033861.3	ENSGALP00000026696.4	ENSGALP00000017513.4 ENSP00000274576.4	ENSP00000274093.3	ENSP00000411593.2	ENSP00000218075.4	ENSP00000347123.4	ENSP00000345284.5	ENSP00000361700.4 ENSPSIP00000003996.1	ENSPSIP00000018446.1	ENSPSIP00000013399.1 gopAga1_00009633-RA	gopAga1_00014991-RA
OG0000488 XP_014453323.1	XP_014453324.1	XP_006277712.1	XP_014457378.1	XP_006268471.1	XP_014457377.1	XP_006268472.1 ENSACAP00000012110.1	ENSACAP00000001251.3	ENSACAP00000016228.3 XP_008165843.1	XP_005288975.1	XP_005288977.1	XP_005288974.1	XP_008165844.1	XP_008165842.1	XP_008174306.1 ENSGALP00000009662.4	ENSGALP00000041561.1	ENSGALP00000006278.3 ENSP00000408695.3	ENSP00000305355.7	ENSP00000318315.7	ENSP00000458564.1	ENSP00000263431.3	ENSP00000462087.1 ENSPSIP00000018400.1	ENSPSIP00000004683.1 gopAga1_00019308-RA	gopAga1_00004099-RB	gopAga1_00004099-RA
OG0000489 XP_014463327.1	XP_014463334.1	XP_014463328.1	XP_006272309.1	XP_014463296.1	XP_006269131.2	XP_006269130.2 ENSACAP00000014689.3	ENSACAP00000008887.2	ENSACAP00000022035.1	ENSACAP00000014691.3 XP_005292608.2	XP_005292571.1	XP_005292562.1	XP_005292561.1	XP_008168797.1	XP_005292610.1 ENSGALP00000005664.4	ENSGALP00000010290.4	ENSGALP00000005693.3 ENSP00000337354.5	ENSP00000360903.1	ENSP00000440375.1	ENSP00000383901.3 ENSPSIP00000019328.1	ENSPSIP00000008806.1	ENSPSIP00000007787.1 gopAga1_00000416-RA	gopAga1_00000426-RA	gopAga1_00000418-RA	gopAga1_00000419-RA
OG0000490 XP_014462143.1	XP_006269800.1	XP_006269801.1 ENSACAP00000014017.2 XP_005282723.1	XP_008162613.1	XP_008162612.1	XP_008162616.1	XP_008162615.1	XP_005282722.1	XP_008162614.1 ENSGALP00000022355.3 ENSP00000467703.1	ENSP00000466291.1	ENSP00000468269.1	ENSP00000468639.1	ENSP00000465318.1	ENSP00000433950.1	ENSP00000465894.1	ENSP00000327257.6	ENSP00000467698.1	ENSP00000467993.1	ENSP00000339423.7	ENSP00000311200.9	ENSP00000312935.4	ENSP00000464842.1	ENSP00000466303.1	ENSP00000468065.1	ENSP00000468606.1 ENSPSIP00000014141.1 gopAga1_00004181-RA
OG0000491 XP_014466400.1	XP_014466397.1	XP_014466403.1	XP_014466402.1	XP_014466396.1	XP_014466398.1	XP_014466399.1	XP_006269849.1 ENSACAP00000010257.3 XP_008172396.1	XP_008172397.1	XP_008172394.1	XP_008172395.1	XP_008172399.1	XP_005308959.1	XP_008172403.1	XP_008172402.1	XP_008172401.1	XP_008172400.1	XP_008172398.1 ENSGALP00000041710.1	ENSGALP00000019263.2 ENSP00000445955.1	ENSP00000440440.1	ENSP00000443179.1	ENSP00000261168.4	ENSP00000444589.1	ENSP00000379575.2 ENSPSIP00000012254.1 gopAga1_00010475-RA	gopAga1_00010476-RA
OG0000492 XP_006270637.1	XP_006270635.1	XP_006270636.1 ENSACAP00000014843.3 XP_005283674.1	XP_008164246.1	XP_008164244.1	XP_008164242.1	XP_008164241.1	XP_008164217.1	XP_008164248.1	XP_008164212.1	XP_008164250.1	XP_008164229.1	XP_008164224.1	XP_008164236.1	XP_008164226.1	XP_008164234.1	XP_008164221.1	XP_008164219.1 ENSGALP00000024765.2 ENSP00000405405.2	ENSP00000405292.1	ENSP00000377502.3	ENSP00000418198.1	ENSP00000418296.1	ENSP00000377500.3	ENSP00000418319.1 ENSPSIP00000019577.1	ENSPSIP00000019582.1 gopAga1_00006611-RA
OG0000493 XP_014455140.1	XP_014455139.1	XP_006272574.2 ENSACAP00000014656.2 XP_005281109.1 ENSGALP00000003077.3 ENSP00000475528.1	ENSP00000465762.1	ENSP00000466868.1	ENSP00000308528.4	ENSP00000475725.1	ENSP00000325612.1	ENSP00000488682.1	ENSP00000488368.1	ENSP00000488787.1	ENSP00000488455.1	ENSP00000487810.1	ENSP00000480766.1	ENSP00000379153.1	ENSP00000269814.5	ENSP00000478286.1	ENSP00000479411.1	ENSP00000464810.1	ENSP00000488448.1	ENSP00000488309.1 ENSPSIP00000018236.1	ENSPSIP00000018247.1 gopAga1_00007790-RC	gopAga1_00007790-RB	gopAga1_00007790-RA	gopAga1_00007790-RD
OG0000494 XP_014450269.1	XP_006272875.1	XP_006272874.1	XP_006272871.1	XP_006272873.1	XP_006272872.1 XP_008161877.1	XP_008161875.1	XP_008161874.1	XP_008161876.1	XP_008161873.1	XP_008161872.1	XP_005298576.1	XP_005298579.1	XP_005298575.1 ENSGALP00000008267.4 ENSP00000346585.4	ENSP00000323833.9	ENSP00000450348.1	ENSP00000473637.1	ENSP00000448832.1	ENSP00000447465.1	ENSP00000354282.5	ENSP00000391813.2	ENSP00000347464.3 ENSPSIP00000019363.1	ENSPSIP00000019359.1 gopAga1_00010438-RF	gopAga1_00010438-RD	gopAga1_00010438-RB	gopAga1_00010438-RC
OG0000495 XP_006276267.1	XP_014465461.1 ENSACAP00000012403.2	ENSACAP00000003576.1 XP_008165635.1	XP_005283347.1	XP_005283346.1	XP_008168305.1	XP_008168306.1	XP_008168307.1	XP_005283349.1 ENSGALP00000006043.3	ENSGALP00000026957.3 ENSP00000486145.1	ENSP00000486555.1	ENSP00000484819.1	ENSP00000481038.1	ENSP00000428009.1	ENSP00000479968.1	ENSP00000480525.1	ENSP00000478779.1	ENSP00000479719.1	ENSP00000453060.1	ENSP00000403793.3	ENSP00000430904.1 ENSPSIP00000007927.1	ENSPSIP00000004359.1	ENSPSIP00000004361.1 gopAga1_00000210-RA	gopAga1_00000208-RA	gopAga1_00014092-RA
OG0000496 XP_014452784.1 ENSACAP00000005659.2	ENSACAP00000023237.1 XP_008161913.1	XP_008161920.1	XP_008161923.1	XP_008161922.1	XP_008161918.1	XP_008161919.1	XP_008161912.1	XP_008161910.1	XP_008161911.1	XP_008161916.1	XP_008161917.1	XP_008161914.1	XP_008161915.1	XP_008161929.1	XP_008161927.1	XP_008161926.1	XP_008161925.1	XP_008161924.1	XP_008161930.1	XP_008161921.1	XP_008161933.1	XP_008161928.1 ENSGALP00000026378.4 ENSP00000382114.2	ENSP00000473409.1	ENSP00000396103.2 ENSPSIP00000005577.1 gopAga1_00009052-RA
OG0000497 XP_014453103.1 XP_008175195.1 ENSP00000410772.2	ENSP00000403986.1	ENSP00000404376.2	ENSP00000397612.1	ENSP00000483517.1	ENSP00000479172.1	ENSP00000415898.1	ENSP00000372681.4	ENSP00000382281.3	ENSP00000480448.1	ENSP00000411700.1	ENSP00000409756.1	ENSP00000396876.2	ENSP00000482399.1	ENSP00000408215.1	ENSP00000484830.1	ENSP00000394108.2	ENSP00000404623.1	ENSP00000412433.1	ENSP00000412177.1	ENSP00000408499.1	ENSP00000406008.1	ENSP00000477633.1	ENSP00000483394.1	ENSP00000382014.3	ENSP00000372539.4	ENSP00000478810.1	ENSP00000363668.5	ENSP00000266000.6
OG0000498 XP_014456128.1	XP_014456129.1	XP_014456130.1	XP_014456131.1 ENSACAP00000008350.3 XP_008177389.1	XP_008177388.1	XP_008177390.1	XP_008177392.1	XP_008177393.1	XP_008177387.1	XP_008177395.1	XP_008177396.1	XP_008177385.1	XP_008177386.1	XP_008177397.1	XP_008177394.1	XP_008177391.1 ENSGALP00000021359.3 ENSP00000378912.3	ENSP00000265136.7	ENSP00000405059.1	ENSP00000378910.2	ENSP00000399500.1	ENSP00000413498.1	ENSP00000401204.1	ENSP00000488001.1	ENSP00000391864.1 ENSPSIP00000004559.1 gopAga1_00000695-RA	gopAga1_00000697-RA
OG0000499 XP_014456644.1	XP_014456657.1	XP_014466769.1	XP_014456663.1	XP_014456651.1 ENSACAP00000013382.2	ENSACAP00000021533.2 XP_008167269.1	XP_008167271.1	XP_008167270.1	XP_008167272.1	XP_008172607.1	XP_005309225.1	XP_005309226.1 ENSGALP00000014766.4	ENSGALP00000042583.1	ENSGALP00000027747.3 ENSP00000376915.3	ENSP00000396020.1	ENSP00000343737.7	ENSP00000386882.1	ENSP00000345752.5	ENSP00000414178.2	ENSP00000359417.3	ENSP00000434105.1 ENSPSIP00000008301.1	ENSPSIP00000016428.1	ENSPSIP00000016410.1 gopAga1_00007850-RA	gopAga1_00002426-RA	gopAga1_00002426-RB
OG0000500 XP_014458183.1	XP_014458182.1	XP_014458181.1	XP_014458180.1	XP_014458179.1	XP_014458178.1	XP_014458174.1	XP_014458175.1	XP_014458173.1	XP_014458172.1	XP_014458177.1	XP_014458176.1 ENSACAP00000001703.3	ENSACAP00000020995.1 XP_008172040.1	XP_005295674.1	XP_008172042.1	XP_008172041.1	XP_008172039.1 ENSGALP00000014417.4 ENSP00000259406.7	ENSP00000312844.6	ENSP00000417994.1	ENSP00000417866.2	ENSP00000418898.1	ENSP00000363251.1	ENSP00000340284.5	ENSP00000378141.3	ENSP00000363255.2 ENSPSIP00000017864.1 gopAga1_00010508-RA
OG0000501 XP_014458592.1	XP_014458580.1	XP_014458581.1	XP_014458591.1	XP_014458587.1	XP_014458586.1	XP_014458588.1	XP_014458589.1	XP_014458590.1	XP_014458585.1	XP_014458584.1	XP_014458583.1	XP_014458582.1 ENSACAP00000015482.3 XP_008167638.1	XP_008167648.1	XP_008167636.1	XP_008167641.1	XP_005282450.1	XP_008167663.1	XP_008167668.1	XP_008167672.1	XP_005282449.1 ENSGALP00000015160.4 ENSP00000378042.2	ENSP00000350813.3	ENSP00000351922.3	ENSP00000406937.1	ENSP00000348573.3 ENSPSIP00000019079.1 gopAga1_00003288-RA
OG0000502 XP_014458993.1	XP_014458986.1	XP_014458992.1	XP_014458991.1	XP_014458990.1	XP_014458989.1	XP_014458981.1	XP_014458982.1	XP_014458983.1	XP_014458984.1	XP_014458985.1	XP_014458987.1	XP_014458988.1 ENSACAP00000010059.2 XP_005310758.1	XP_005310757.1	XP_005310756.1	XP_005310759.1 ENSGALP00000027948.2 ENSP00000309771.2	ENSP00000377216.1	ENSP00000480966.1	ENSP00000442990.1	ENSP00000443427.1	ENSP00000445652.1	ENSP00000377217.2	ENSP00000440770.1	ENSP00000442551.1	ENSP00000377215.2 ENSPSIP00000000585.1 gopAga1_00009176-RA
OG0000503 XP_014459240.1	XP_014459238.1	XP_014459237.1	XP_014459236.1	XP_014459232.1	XP_014459235.1	XP_014459233.1	XP_014459234.1 ENSACAP00000000938.2 XP_005299492.1	XP_005299505.1	XP_005299491.1	XP_005299497.1	XP_005299494.1	XP_005299495.1	XP_005299504.1	XP_005299496.1	XP_005299503.1	XP_005299502.1	XP_005299501.1	XP_005299500.1	XP_005299499.1	XP_005299498.1	XP_008167673.1 ENSGALP00000002160.3 ENSP00000259371.2	ENSP00000386183.3	ENSP00000362887.3	ENSP00000310827.1 ENSPSIP00000016854.1 gopAga1_00000505-RA
OG0000504 XP_014460065.1	XP_014460064.1	XP_014460068.1	XP_014460069.1	XP_014460070.1	XP_014460071.1	XP_014460067.1	XP_014460066.1	XP_014460072.1 ENSACAP00000009381.3 XP_005303697.1	XP_005303698.1	XP_005303699.1	XP_005303701.1	XP_005303702.1	XP_005303704.1	XP_005303696.1	XP_008170000.1	XP_008169998.1	XP_008169999.1 ENSGALP00000010701.4 ENSP00000346432.3	ENSP00000372716.3	ENSP00000426129.1	ENSP00000328382.5	ENSP00000475903.1	ENSP00000336524.3	ENSP00000426866.1	ENSP00000482219.1 ENSPSIP00000015636.1 gopAga1_00006642-RA
OG0000505 XP_014460469.1 ENSACAP00000007847.3	ENSACAP00000007747.2 XP_008173191.1	XP_008175738.1	XP_008173915.1	XP_005314392.1	XP_008173914.1	XP_005314035.1	XP_008175513.1 ENSGALP00000000252.4	ENSGALP00000041466.1 ENSP00000404683.1	ENSP00000376504.1	ENSP00000355070.5	ENSP00000407726.2	ENSP00000376501.4 gopAga1_00020028-RA	gopAga1_00019843-RA	gopAga1_00019484-RA	gopAga1_00016764-RH	gopAga1_00019078-RB	gopAga1_00016080-RA	gopAga1_00016764-RC	gopAga1_00016764-RB	gopAga1_00016764-RA	gopAga1_00016764-RF	gopAga1_00016764-RD	gopAga1_00016764-RE	gopAga1_00016764-RG	gopAga1_00016763-RA
OG0000506 XP_014461417.1 ENSACAP00000011621.2 XP_005301750.1	XP_008169092.1	XP_005301753.1	XP_005301754.1	XP_005301751.1	XP_005301752.1	XP_005301755.1 ENSGALP00000010498.4 ENSP00000484971.1	ENSP00000478129.1	ENSP00000452625.1	ENSP00000453308.1	ENSP00000453571.1	ENSP00000453710.1	ENSP00000456973.1	ENSP00000479071.1	ENSP00000455146.1	ENSP00000454152.1	ENSP00000454273.1	ENSP00000454409.1	ENSP00000454137.1	ENSP00000453709.1	ENSP00000453291.1	ENSP00000452664.1	ENSP00000453888.1	ENSP00000261749.6	ENSP00000452735.1 ENSPSIP00000013536.1 gopAga1_00011770-RA
OG0000507 XP_014462263.1 ENSACAP00000010952.3 XP_008174850.1 ENSP00000408583.2	ENSP00000401012.2	ENSP00000401424.1	ENSP00000416957.2	ENSP00000382888.3	ENSP00000372863.2	ENSP00000399344.1	ENSP00000397323.2	ENSP00000396119.2	ENSP00000398286.2	ENSP00000403402.2	ENSP00000411035.1	ENSP00000400838.1	ENSP00000400861.2	ENSP00000406110.2	ENSP00000364687.4	ENSP00000364680.4	ENSP00000379078.3	ENSP00000364678.4	ENSP00000382886.3	ENSP00000388879.2	ENSP00000414377.2	ENSP00000486948.1	ENSP00000413358.1	ENSP00000399135.2	ENSP00000372864.4	ENSP00000486997.1	ENSP00000392305.2
OG0000508 XP_014462381.1	XP_014462382.1 ENSACAP00000014511.3 XP_008163521.1	XP_005309343.1	XP_005309344.1	XP_005309345.1	XP_005309346.1	XP_005309347.1	XP_005309348.1	XP_005309349.1	XP_005309350.1	XP_005309351.1	XP_008163519.1	XP_008163518.1	XP_008163517.1	XP_008163516.1	XP_008163520.1	XP_005309353.1	XP_008163515.1	XP_008163514.1 ENSGALP00000025135.4 ENSP00000303221.7	ENSP00000373393.2	ENSP00000373392.3	ENSP00000342626.3	ENSP00000410176.1	ENSP00000373394.4	ENSP00000373395.2 ENSPSIP00000020463.1 gopAga1_00001990-RA
OG0000509 XP_014465209.1	XP_014465208.1	XP_014465210.1	XP_014464297.1	XP_014465207.1 ENSACAP00000011141.3	ENSACAP00000020456.1 XP_008176276.1	XP_005291786.1	XP_008170427.1	XP_008168287.1	XP_005315510.2	XP_008170428.1 ENSGALP00000042919.1	ENSGALP00000009948.3 ENSP00000432656.1	ENSP00000262929.5	ENSP00000342759.4	ENSP00000456351.1	ENSP00000371016.3	ENSP00000457944.1	ENSP00000402438.1	ENSP00000435045.1	ENSP00000457551.2	ENSP00000454437.1	ENSP00000371034.1	ENSP00000371036.3 gopAga1_00009826-RC	gopAga1_00009826-RB	gopAga1_00009825-RA	gopAga1_00009826-RA
OG0000510 XP_006258003.1	XP_014452917.1 ENSACAP00000004001.2	ENSACAP00000020186.1	ENSACAP00000017986.1	ENSACAP00000000230.2 XP_005282984.1	XP_005306164.1	XP_005306165.1	XP_005306166.1	XP_005282978.1	XP_005282979.1	XP_005282980.1	XP_005282982.1	XP_005282983.1	XP_005282981.1 ENSGALP00000041450.1	ENSGALP00000004102.4	ENSGALP00000005803.4 ENSP00000463626.1	ENSP00000464006.1	ENSP00000464584.1	ENSP00000464364.1	ENSP00000299954.10 ENSPSIP00000016506.1	ENSPSIP00000007457.1 gopAga1_00000557-RA	gopAga1_00000556-RC	gopAga1_00000556-RB	gopAga1_00008685-RA
OG0000511 XP_006266175.2	XP_006259237.2	XP_006258301.1 ENSACAP00000014108.3	ENSACAP00000007327.3	ENSACAP00000003407.3 XP_008172597.1	XP_008172596.1	XP_008171094.1	XP_005312969.1 ENSGALP00000016972.4	ENSGALP00000039908.2	ENSGALP00000027770.3 ENSP00000411687.2	ENSP00000420545.1	ENSP00000264613.6	ENSP00000313699.9	ENSP00000343939.2	ENSP00000430620.1	ENSP00000337418.5 ENSPSIP00000011395.1	ENSPSIP00000005209.1	ENSPSIP00000005204.1	ENSPSIP00000017764.1	ENSPSIP00000017792.1 gopAga1_00006198-RC	gopAga1_00004699-RA	gopAga1_00006198-RB	gopAga1_00015311-RA	gopAga1_00006198-RA
OG0000512 XP_006258917.1	XP_014465708.1	XP_014465709.1	XP_014465710.1	XP_014465711.1	XP_014465707.1	XP_014465706.1 ENSACAP00000000770.3 XP_005308521.1	XP_005308529.1	XP_005308517.1	XP_005308518.1	XP_005308520.1	XP_005308522.1	XP_005308528.1	XP_005308525.1	XP_005308524.1	XP_005308527.1	XP_005308526.1	XP_005308523.1 ENSGALP00000026768.4	ENSGALP00000026767.4 ENSP00000288599.5	ENSP00000379197.3	ENSP00000385216.1	ENSP00000385097.1	ENSP00000320940.5	ENSP00000385195.1 ENSPSIP00000008403.1 gopAga1_00007103-RA
OG0000513 XP_006259505.1	XP_014454616.1 ENSACAP00000004907.3 XP_008163458.1	XP_008163459.1	XP_008163456.1	XP_008163457.1	XP_008163454.1	XP_008163455.1	XP_008163453.1 ENSGALP00000025741.3 ENSP00000370691.4	ENSP00000396054.1	ENSP00000370685.5	ENSP00000382275.4	ENSP00000370684.3	ENSP00000389013.1	ENSP00000382290.1	ENSP00000382292.2	ENSP00000382286.1	ENSP00000382301.3	ENSP00000382289.1	ENSP00000370719.3 ENSPSIP00000007125.1 gopAga1_00013067-RA	gopAga1_00013069-RA	gopAga1_00013069-RB	gopAga1_00013068-RA	gopAga1_00013068-RB	gopAga1_00013070-RA
OG0000514 XP_006264395.1	XP_014458958.1	XP_006259565.1	XP_014452849.1	XP_006259566.1 ENSACAP00000011752.2	ENSACAP00000014534.2	ENSACAP00000003669.2 XP_008170198.1	XP_005279108.1	XP_005285119.1 ENSGALP00000041790.1	ENSGALP00000005505.3 ENSP00000467501.1	ENSP00000453111.1	ENSP00000300935.2	ENSP00000453982.1	ENSP00000453679.1	ENSP00000312734.4	ENSP00000453236.1	ENSP00000357564.3	ENSP00000381540.3 ENSPSIP00000008723.1	ENSPSIP00000006877.1	ENSPSIP00000003328.1 gopAga1_00017982-RA	gopAga1_00012732-RA	gopAga1_00003309-RC	gopAga1_00003309-RA	gopAga1_00003309-RB
OG0000515 XP_006259839.2 ENSACAP00000018995.1 XP_005280328.1	XP_005280329.1 ENSP00000364855.3	ENSP00000405073.2	ENSP00000462078.1	ENSP00000364903.3	ENSP00000394017.2	ENSP00000399721.1	ENSP00000414937.1	ENSP00000394649.1	ENSP00000401072.2	ENSP00000387609.2	ENSP00000413831.1	ENSP00000406868.1	ENSP00000394619.2	ENSP00000436555.1	ENSP00000395133.1	ENSP00000457803.1	ENSP00000417871.2	ENSP00000407047.1	ENSP00000406269.2	ENSP00000388037.1	ENSP00000409181.2	ENSP00000364892.3	ENSP00000402659.1	ENSP00000364908.3 ENSPSIP00000001413.1 gopAga1_00008188-RA
OG0000516 XP_014465246.1	XP_006260001.1	XP_006273120.1 ENSACAP00000004966.2	ENSACAP00000017696.2	ENSACAP00000006264.2	ENSACAP00000019960.1 XP_008169014.1	XP_008172972.1	XP_005301259.1 ENSGALP00000009594.4	ENSGALP00000024609.4 ENSP00000395483.2	ENSP00000343515.5	ENSP00000354552.2	ENSP00000339432.4	ENSP00000407085.1	ENSP00000406293.2	ENSP00000474530.1	ENSP00000428370.1	ENSP00000429192.1	ENSP00000428426.2	ENSP00000488976.1	ENSP00000489592.1	ENSP00000416026.1 ENSPSIP00000020172.1	ENSPSIP00000012057.1	ENSPSIP00000010895.1 gopAga1_00002371-RA	gopAga1_00002097-RA
OG0000517 XP_014462340.1	XP_006260002.1	XP_014461230.1	XP_014461229.1 ENSACAP00000018992.1	ENSACAP00000005050.2	ENSACAP00000021866.1 XP_005302139.1	XP_005302140.1	XP_005301254.1	XP_005301258.1	XP_005302138.1 ENSGALP00000006365.3	ENSGALP00000043246.1 ENSP00000363638.3	ENSP00000363626.3	ENSP00000388003.1	ENSP00000428306.1	ENSP00000484280.1	ENSP00000409004.1	ENSP00000363627.3	ENSP00000482430.1	ENSP00000344477.6	ENSP00000320043.3	ENSP00000363625.1	ENSP00000428729.1 ENSPSIP00000007795.1	ENSPSIP00000007538.1 gopAga1_00015107-RA	gopAga1_00002370-RA
OG0000518 XP_006261685.1	XP_006265695.1	XP_006265777.1	XP_006260406.1 ENSACAP00000006985.2	ENSACAP00000001285.1 XP_005295010.1	XP_005314849.1	XP_008177023.1	XP_008177022.1	XP_008177025.1	XP_008177024.1 ENSGALP00000043272.1 ENSP00000432648.1	ENSP00000300022.3	ENSP00000432165.1	ENSP00000312272.4	ENSP00000457976.1	ENSP00000456427.1	ENSP00000381821.1	ENSP00000381818.4	ENSP00000464285.1	ENSP00000454350.1	ENSP00000342832.3 ENSPSIP00000005968.1	ENSPSIP00000012010.1	ENSPSIP00000005952.1	ENSPSIP00000003353.1 gopAga1_00010944-RA	gopAga1_00000614-RA
OG0000519 XP_006260534.1	XP_006260532.1	XP_006260533.1	XP_006260531.1	XP_014466696.1 ENSACAP00000017560.1 XP_005311606.1	XP_008178087.1	XP_008178086.1	XP_005311023.1 ENSGALP00000026067.1 ENSP00000369629.2	ENSP00000482964.1	ENSP00000469891.1	ENSP00000418705.1	ENSP00000420672.1	ENSP00000471804.1	ENSP00000291552.4	ENSP00000381205.1	ENSP00000368258.2	ENSP00000397645.2	ENSP00000485382.1	ENSP00000480611.2	ENSP00000485022.1 ENSPSIP00000004613.1	ENSPSIP00000007862.1 gopAga1_00015483-RA	gopAga1_00016949-RC	gopAga1_00016949-RA	gopAga1_00016949-RB
OG0000520 XP_014450367.1	XP_014450368.1	XP_006262595.2	XP_006262596.1 ENSACAP00000006482.3 XP_008166692.1	XP_008166688.1	XP_008166693.1	XP_008166685.1	XP_008166684.1	XP_008166687.1	XP_008166691.1	XP_008166683.1	XP_005282127.1	XP_005282128.1	XP_005282126.1	XP_008166690.1	XP_008166686.1 ENSGALP00000022108.3 ENSP00000262102.6	ENSP00000430167.1	ENSP00000489288.1	ENSP00000297488.6	ENSP00000431016.1	ENSP00000371285.3	ENSP00000371293.3	ENSP00000445738.1 ENSPSIP00000018036.1 gopAga1_00000889-RA	gopAga1_00000888-RA
OG0000521 XP_006264835.2	XP_014463568.1	XP_014463567.1	XP_014463566.1	XP_014463563.1	XP_014463562.1	XP_014463565.1	XP_014463564.1 ENSACAP00000021627.1	ENSACAP00000015218.2 XP_008177031.1	XP_008177032.1	XP_008177033.1	XP_008177034.1 ENSGALP00000008478.3 ENSP00000465328.1	ENSP00000484605.2	ENSP00000466078.1	ENSP00000385323.2	ENSP00000465539.1	ENSP00000468682.1	ENSP00000468592.1	ENSP00000386173.2	ENSP00000375067.4	ENSP00000464825.1	ENSP00000465175.1	ENSP00000466552.1	ENSP00000485015.2 ENSPSIP00000017813.1 gopAga1_00005103-RA
OG0000522 XP_014466687.1	XP_014466685.1	XP_014466684.1	XP_006265278.1	XP_006265279.1 ENSACAP00000022545.1	ENSACAP00000017649.3 XP_005301822.1	XP_005301823.1	XP_008169118.1	XP_005301825.1	XP_005301824.1	XP_005301827.1	XP_005301826.1	XP_008169116.1	XP_008169117.1	XP_005301829.1	XP_005301828.1 ENSGALP00000026115.4 ENSP00000367408.4	ENSP00000367400.1	ENSP00000367405.1	ENSP00000400526.2	ENSP00000367410.2	ENSP00000367421.3	ENSP00000367396.1	ENSP00000398007.2 ENSPSIP00000018176.1	ENSPSIP00000018170.1 gopAga1_00007734-RA
OG0000523 XP_014464867.1	XP_014464870.1	XP_014464869.1	XP_014464868.1	XP_014464865.1	XP_006265713.1	XP_006265714.1	XP_006265717.1 ENSACAP00000010744.3 XP_005284052.1	XP_008170049.1 ENSGALP00000019031.4	ENSGALP00000019033.3 ENSP00000392541.1	ENSP00000384695.3	ENSP00000426179.1	ENSP00000483421.1	ENSP00000480485.1	ENSP00000421027.1	ENSP00000422784.1	ENSP00000295897.4	ENSP00000379138.2	ENSP00000226359.2	ENSP00000401820.2 ENSPSIP00000011433.1	ENSPSIP00000010348.1	ENSPSIP00000010338.1 gopAga1_00017238-RA	gopAga1_00017239-RA	gopAga1_00017025-RA
OG0000524 XP_006266413.2	XP_014457707.1	XP_014457706.1	XP_014457705.1	XP_014457704.1	XP_014457708.1	XP_014457709.1 ENSACAP00000004039.3 XP_005290871.1	XP_005290872.1	XP_005290873.1	XP_005290874.1	XP_005290869.1	XP_005290870.1	XP_005290875.1	XP_005290876.1	XP_005290878.1	XP_008177133.1	XP_008177132.1	XP_005290877.1	XP_005290880.1	XP_005290879.1	XP_005290881.1 ENSGALP00000008476.4 ENSP00000435469.1	ENSP00000437321.1	ENSP00000299492.4	ENSP00000436498.1 ENSPSIP00000017947.1 gopAga1_00006861-RA
OG0000525 XP_014449864.1	XP_014464575.1	XP_006266946.2	XP_014464577.1	XP_014464576.1 ENSACAP00000001003.2	ENSACAP00000009581.3 XP_008161153.1	XP_008161152.1	XP_008161154.1	XP_005306149.1	XP_005291074.1	XP_005291071.1	XP_005291075.1	XP_005291076.1	XP_005291072.1 ENSGALP00000013813.4	ENSGALP00000011451.4 ENSP00000363838.1	ENSP00000473625.1	ENSP00000363836.4	ENSP00000265375.9	ENSP00000344275.5	ENSP00000396072.1	ENSP00000342344.5	ENSP00000295414.3	ENSP00000376045.3 ENSPSIP00000005905.1	ENSPSIP00000019903.1 gopAga1_00003534-RA
OG0000526 XP_014456879.1	XP_014456878.1	XP_014456881.1	XP_014456880.1	XP_014456882.1	XP_014456870.1	XP_006267448.1 ENSACAP00000021965.1	ENSACAP00000008485.3 XP_008171686.1	XP_008171692.1	XP_005278811.1	XP_008171688.1	XP_005278813.1	XP_005278814.1	XP_005278815.1	XP_005278812.1	XP_008171687.1 ENSGALP00000008004.4	ENSGALP00000008020.3 ENSP00000361785.2	ENSP00000436312.3	ENSP00000475626.1	ENSP00000475675.1	ENSP00000475801.2	ENSP00000444580.1	ENSP00000434041.1 ENSPSIP00000018982.1 gopAga1_00004881-RA	gopAga1_00004880-RA
OG0000527 XP_006268101.2	XP_006269562.1	XP_014466377.1 ENSACAP00000019873.1 XP_005308995.1	XP_005308990.1	XP_005308997.1	XP_005309000.1	XP_005309007.1	XP_008172409.1	XP_008174602.1 ENSGALP00000037266.1	ENSGALP00000019205.1	ENSGALP00000019163.2 ENSP00000330074.3	ENSP00000339566.2	ENSP00000307705.3	ENSP00000244534.5	ENSP00000244573.3	ENSP00000341214.4 ENSPSIP00000001366.1	ENSPSIP00000001528.1	ENSPSIP00000001013.1 gopAga1_00019486-RA	gopAga1_00015330-RA	gopAga1_00016828-RA	gopAga1_00016819-RA	gopAga1_00019184-RA	gopAga1_00019641-RA	gopAga1_00013250-RA
OG0000528 XP_014453316.1	XP_006268477.1	XP_014453315.1	XP_014453314.1	XP_006268479.1	XP_006268476.1	XP_006268475.1	XP_006268478.1 ENSACAP00000011749.3 XP_008163032.1	XP_008163034.1	XP_008163035.1	XP_008163033.1	XP_008163027.1	XP_008163029.1	XP_008163028.1	XP_008163030.1	XP_008163031.1	XP_008163026.1	XP_008163025.1 ENSGALP00000009774.4 ENSP00000404278.2	ENSP00000379144.3	ENSP00000326900.7 ENSPSIP00000004207.1 gopAga1_00005654-RE	gopAga1_00005654-RA	gopAga1_00005654-RD	gopAga1_00005654-RB	gopAga1_00005654-RC
OG0000529 XP_006269263.1 ENSACAP00000001090.3 XP_005291037.1	XP_005291038.1	XP_005291039.1	XP_005291040.1	XP_005291055.1	XP_005291051.1	XP_005291050.1	XP_005291048.1	XP_005291042.1	XP_005291043.1	XP_005291046.1	XP_005291044.1	XP_005291045.1	XP_008161147.1	XP_008161144.1	XP_008161145.1	XP_005291047.1	XP_008161148.1 ENSGALP00000011528.4	ENSGALP00000037731.2 ENSP00000363926.3	ENSP00000443147.1	ENSP00000363920.3	ENSP00000340591.4	ENSP00000363922.3	ENSP00000341844.5 ENSPSIP00000013510.1	ENSPSIP00000013538.1
OG0000530 XP_014457384.1	XP_014457382.1	XP_014457383.1	XP_006269264.1	XP_014457381.1 ENSACAP00000011144.2 XP_008162075.1	XP_008162074.1	XP_008162072.1	XP_008162071.1	XP_008162070.1	XP_008162073.1 ENSGALP00000002525.3 ENSP00000438089.2	ENSP00000329161.8	ENSP00000466648.1	ENSP00000466247.1	ENSP00000468120.1	ENSP00000406987.2	ENSP00000403194.1	ENSP00000465464.1	ENSP00000405877.1	ENSP00000468406.1	ENSP00000415624.1	ENSP00000391249.1	ENSP00000400181.2	ENSP00000468668.1 ENSPSIP00000020434.1	ENSPSIP00000020431.1 gopAga1_00005595-RA
OG0000531 XP_014453856.1	XP_014453855.1	XP_014453857.1	XP_006269772.1 ENSACAP00000009873.3	ENSACAP00000006175.3 XP_005299436.2	XP_008167634.1	XP_008167635.1	XP_005310812.1	XP_008173357.1	XP_005310817.1	XP_005310816.1	XP_005310814.1	XP_005310813.1 ENSGALP00000025553.3	ENSGALP00000002482.4	ENSGALP00000041868.1	ENSGALP00000042820.1 ENSP00000477590.1	ENSP00000198765.4	ENSP00000317257.5	ENSP00000380585.1	ENSP00000415597.1	ENSP00000336945.4	ENSP00000396069.1 ENSPSIP00000020418.1	ENSPSIP00000008312.1 gopAga1_00008964-RA	gopAga1_00015949-RA
OG0000532 XP_006270718.2 ENSACAP00000010203.3 XP_005283130.1	XP_008165932.1 ENSGALP00000011804.4 ENSP00000336579.5	ENSP00000414068.2	ENSP00000464440.1	ENSP00000482845.1	ENSP00000463352.1	ENSP00000463342.1	ENSP00000384949.2	ENSP00000463226.1	ENSP00000386002.4	ENSP00000463343.1	ENSP00000464098.1	ENSP00000463601.1	ENSP00000462398.1	ENSP00000342502.6	ENSP00000385483.4	ENSP00000480779.1	ENSP00000485679.1	ENSP00000463225.1	ENSP00000462892.1	ENSP00000328858.8	ENSP00000479793.1	ENSP00000482614.1 ENSPSIP00000017420.1 gopAga1_00011481-RC	gopAga1_00011481-RA
OG0000533 XP_006271747.1 ENSACAP00000003447.2	ENSACAP00000004171.2 XP_005313242.1 ENSP00000382314.3	ENSP00000402212.1	ENSP00000402553.1	ENSP00000448607.1	ENSP00000404773.1	ENSP00000420135.1	ENSP00000363738.2	ENSP00000363734.5	ENSP00000378563.1	ENSP00000400152.2	ENSP00000415678.1	ENSP00000419351.1	ENSP00000449925.1	ENSP00000363735.1	ENSP00000447540.1	ENSP00000419277.1	ENSP00000372694.2	ENSP00000382316.1	ENSP00000395462.2	ENSP00000448784.1	ENSP00000420209.1	ENSP00000403771.1	ENSP00000412319.2	ENSP00000398171.1	ENSP00000418433.1 gopAga1_00017011-RA
OG0000534 XP_014456819.1	XP_006271992.2	XP_006273538.1	XP_006273539.1 ENSACAP00000009466.3	ENSACAP00000006764.2	ENSACAP00000005716.2 XP_005281953.1	XP_005285287.1	XP_008172494.1	XP_005281954.1 ENSGALP00000041197.1	ENSGALP00000015855.4	ENSGALP00000006708.3	ENSGALP00000006706.3 ENSP00000346643.5	ENSP00000290573.2	ENSP00000387140.1	ENSP00000352398.6	ENSP00000415949.1 ENSPSIP00000019825.1	ENSPSIP00000019827.1	ENSPSIP00000017050.1	ENSPSIP00000017903.1 gopAga1_00007714-RA	gopAga1_00007715-RB	gopAga1_00007715-RA	gopAga1_00010675-RA	gopAga1_00010200-RA	gopAga1_00007714-RB
OG0000535 XP_014453120.1	XP_014453122.1	XP_014453115.1	XP_014453118.1	XP_014453119.1	XP_014453117.1	XP_014453116.1	XP_014453114.1	XP_006277661.1	XP_006272450.1	XP_014453121.1 ENSACAP00000016562.3	ENSACAP00000016745.3 XP_008165098.1	XP_005310371.1	XP_005310370.1 ENSGALP00000041260.1	ENSGALP00000009752.4 ENSP00000479484.1	ENSP00000386358.2	ENSP00000394734.2	ENSP00000326830.4	ENSP00000316948.4 ENSPSIP00000003991.1	ENSPSIP00000018122.1 gopAga1_00002236-RA	gopAga1_00001937-RD	gopAga1_00001937-RB	gopAga1_00001937-RA	gopAga1_00001937-RC
[truncated: 17,150 more rows]
[truncated: 1,259 more columns]
