# Supplementary material for: The Agassiz’s desert tortoise genome provides a resource for the conservation of a threatened species
Source: PLoS One. 2017 May 31;12(5):e0177708. doi: 10.1371/journal.pone.0177708 (PMC5451010; doi:10.1371/journal.pone.0177708)
Supplement: S7 Table — (XLSX) [file pone.0177708.s012.xlsx]

## Sheet: Sheet1
Term ID	Name	Type	p-value
GO:0044424	intracellular part	CC	5.61e-08
GO:0005622	intracellular	CC	6.94e-06
GO:0043231	intracellular membrane-bounded organelle	CC	7.74e-06
GO:0043229	intracellular organelle	CC	6.03e-05
GO:0043227	membrane-bounded organelle	CC	0.000454
GO:0043226	organelle	CC	0.00301
GO:0005737	cytoplasm	CC	0.0067
GO:0044464	cell part	CC	0.04
GO:0044446	intracellular organelle part	CC	0.0484
GO:0005515	protein binding	MF	0.00575
